# Supplementary material
Source: PubMed Central journal article supplement (PMC3901393)

## Supplementary Information

### ‘Naked’ and Hydrated Conformers of the Conserved Core-Pentasaccharide of *N*-linked Glycoproteins and its Building Blocks

Conor S. Barry,<sup>†,#</sup> Emilio J. Cocinero,<sup>‡,1,#</sup> Pierre Çarçabal,<sup>§,#</sup> David P. Gamblin,<sup>†,#</sup> E. Cristina Stanca-Kaposta,<sup>‡,2</sup> Sarah M. Remmert,<sup>‡</sup> María C. Fernández-Alonso,<sup>||</sup> Svemir Rudić,<sup>†,‡</sup> John P. Simons<sup>\*‡</sup> and Benjamin G. Davis<sup>\*†</sup>

<sup>†</sup> *Department of Chemistry, University of Oxford, Chemistry Research Laboratory, Mansfield Road, Oxford OX1 3TA, UK*

<sup>‡</sup> *Department of Chemistry, University of Oxford, Physical and Theoretical Chemistry Laboratory, South Parks Road, Oxford OX1 3QZ UK*

<sup>§</sup> *Institut des Sciences Moléculaire d’Orsay-CNRS, Université Paris Sud, 91405 Orsay Cedex, France.*

<sup>||</sup> *Centro de Investigaciones Biológicas. Calle Ramiro de Maeztu, 9, 28040, Madrid, Spain.*

[John.Simons@chem.ox.ac.uk](mailto:John.Simons@chem.ox.ac.uk), [Ben.Davis@chem.ox.ac.uk](mailto:Ben.Davis@chem.ox.ac.uk)

## Table of Contents

|                                                                                                                                             |     |
|---------------------------------------------------------------------------------------------------------------------------------------------|-----|
| Supplementary Results                                                                                                                       | S3  |
| Synthetic Schemes                                                                                                                           | S3  |
| Photoionisation and time of flight mass spectra of <b>1-4</b> .                                                                             | S5  |
| Lowest energy structures, relative- and free energies of <b>1</b> and <b>1·H<sub>2</sub>O</b> .                                             | S7  |
| Lowest energy structures, relative- and free energies of <b>2</b> , <b>2·H<sub>2</sub>O</b> , <b>2-B</b><br>and <b>2-B·H<sub>2</sub>O</b> . | S9  |
| Lowest energy structures, relative- and free energies of <b>3</b> and <b>3-B</b> .                                                          | S12 |
| Hydrogen bonding distributions of <b>4</b> , obtained from MM/OPLS2005<br>calculations.                                                     | S14 |
| Molecular shape/size distributions of <b>4</b> obtained from MM/OPLS2005<br>calculations.                                                   | S15 |
| Supplementary Methods                                                                                                                       | S17 |
| General Experimental                                                                                                                        | S17 |
| Computational Strategies                                                                                                                    | S20 |
| Conformational Analysis of <b>4</b>                                                                                                         | S21 |
| Supplementary chemistry schemes, synthesis and characterization                                                                             | S23 |
| General Synthetic Considerations                                                                                                            | S23 |
| Synthesis of Compound <b>1</b>                                                                                                              | S24 |
| Synthesis of Compound <b>2</b>                                                                                                              | S40 |
| Synthesis of Compound <b>3</b>                                                                                                              | S50 |
| Synthesis of Compound <b>4</b>                                                                                                              | S60 |
| References                                                                                                                                  | S91 |
| NMR spectra                                                                                                                                 | S93 |

# Supplementary Results

## Synthetic Schemes

Full synthetic scheme detailing the synthesis of compounds **1**, **2** and **3**.

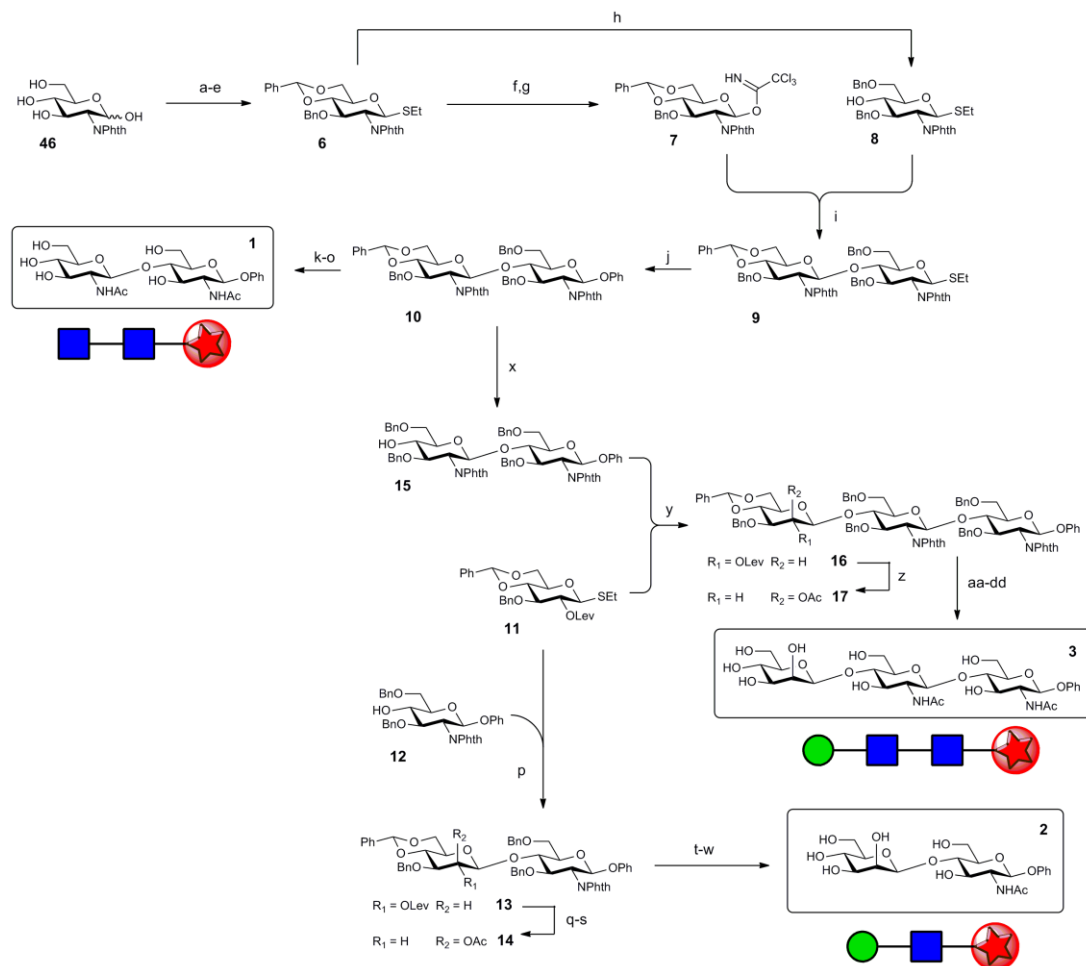

**Supplementary Figure S1. Reagents & conditions:** a)  $\text{Ac}_2\text{O}$ , pyridine, rt, 67%; b) EtSH, TMS-OTf, DCM, rt, 80%; c) NaOMe, MeOH, rt, 99%; d) benzaldehyde dimethylacetal, TsOH, MeCN, rt, 94%; e) i: NaH, DMF, rt, ii: BnBr, TBAI, DMF, 91%; f) NBS, acetone/ $\text{H}_2\text{O}$ ,  $-10^\circ\text{C}$ ; g)  $\text{Cl}_3\text{CCN}$ , DBU, DCM, rt, 84% over two steps; h)  $\text{NaBH}_3\text{CN}$ , HCl/dioxane, THF,  $0^\circ\text{C}$ -rt, 82%; i) TMS-OTf, DCM,  $-78^\circ\text{C}$ , 95%; j) PhOH, NIS, TMS-OTf, DCM, 4 Å MS,  $-10^\circ\text{C}$ , 37%; k) 1,2-ethylenediamine, BuOH,  $\Delta$ ; l)  $\text{Ac}_2\text{O}$ , pyridine, 66% over two steps; m)  $\text{H}_2$ , Pd(OH) $_2$ , EtOH; n)  $\text{Ac}_2\text{O}$ , pyridine, 92% over two steps; o) NaOMe, MeOH, 94%; p) NIS, TMSOTf, 4 Å MS, 88%; q)  $\text{H}_2\text{NNH}_2\cdot\text{HOAc}$ , MeOH,  $55^\circ\text{C}$ , 95%; r)  $\text{Tf}_2\text{O}$ , DCM, pyridine; s)  $\text{Bu}_4\text{N}\cdot\text{OAc}$ , toluene,  $\Delta$ , 84% over two steps; t)  $\text{H}_2$ , Pd(OH) $_2$ , EtOH; u) 1,2-ethylenediamine, BuOH,  $\Delta$ ; v)  $\text{Ac}_2\text{O}$ , pyridine, 74% over three steps; w) NaOMe, MeOH, 94%; x)  $\text{NaBH}_3\text{CN}$ , HCl/dioxane, THF,  $0^\circ\text{C}$ -rt, 80%; y) MeOTf, DCM, 4 Å MS, 75%; z) i -  $\text{H}_2\text{NNH}_2\cdot\text{HOAc}$ , MeOH,  $55^\circ\text{C}$ ; ii -  $\text{Tf}_2\text{O}$ , DCM, pyridine; iii -  $\text{Bu}_4\text{N}\cdot\text{OAc}$ , toluene,  $\Delta$ , 68% over three steps; aa)  $\text{H}_2$ , Pd(OH) $_2$ , EtOH; bb) 1,2-ethylenediamine, BuOH,  $\Delta$ ; cc)  $\text{Ac}_2\text{O}$ , pyridine, 94% over three steps; dd) NaOMe, MeOH, 86%.

Full synthetic scheme detailing the completion of the synthesis of **4**.

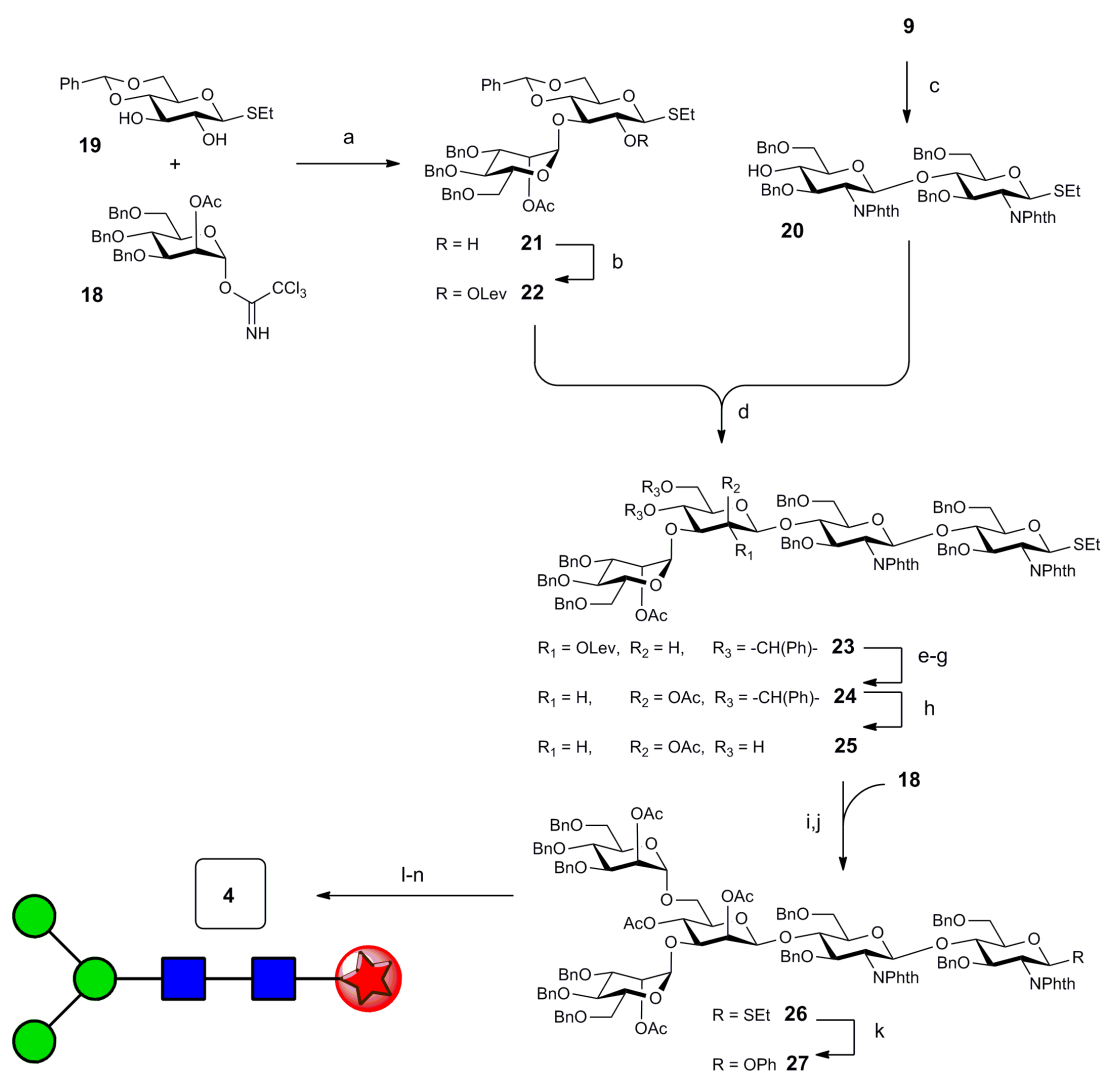

**Supplementary Figure S2. Reagents & conditions:** a) TMS-OTf, DCM,  $-78^{\circ}\text{C}$ , 76%; b) LevOH, DIC, DCM, 94%; c)  $\text{NaBH}_3\text{CN}$ , HCl/dioxane, THF,  $0^{\circ}\text{C}$ -rt, 91%; d)  $\text{Ph}_2\text{O}$ ,  $\text{Tf}_2\text{O}$ , DTBMP, DCM,  $-40^{\circ}\text{C}$  – rt, 64%; e)  $\text{H}_2\text{NNH}_2\cdot\text{HOAc}$ , MeOH,  $55^{\circ}\text{C}$ , 64%; f)  $\text{Tf}_2\text{O}$ , DCM, pyridine; g)  $\text{Bu}_4\text{N}\cdot\text{OAc}$ , toluene,  $55^{\circ}\text{C}$ , 88% over two steps; h)  $\text{TsOH}\cdot\text{H}_2\text{O}$ , MeOH, 1,4-Dioxane,  $85^{\circ}\text{C}$ , 92%; i) **18**, TMS-OTf, DCM,  $-40^{\circ}\text{C}$ , 85%; j)  $\text{Ac}_2\text{O}$ , pyridine; k) PhOH, NIS, TMS-OTf, DCM,  $4\text{\AA}$  MS,  $-10^{\circ}\text{C}$ , 48% over two steps; l) 1,2-ethylenediamine, MeOH,  $\Delta$ , then  $\text{Ac}_2\text{O}$ , pyridine, 80% over two steps; m)  $\text{H}_2$ ,  $\text{Pd}(\text{OH})_2\text{-C}$ , MeOH, 97%; n) NaOMe, MeOH, 88%.

### Photoionisation and time of flight mass spectra of 1-4.

Resonant 2-photon ionisation (R2PI) spectra of **2**, **3** and **4** were recorded in their parent ion channels. The two-colour photo-ionisation spectrum of **1** was recorded with  $\omega_1$  fixed at  $36,232\text{ cm}^{-1}$  while  $\omega_2$  was scanned.

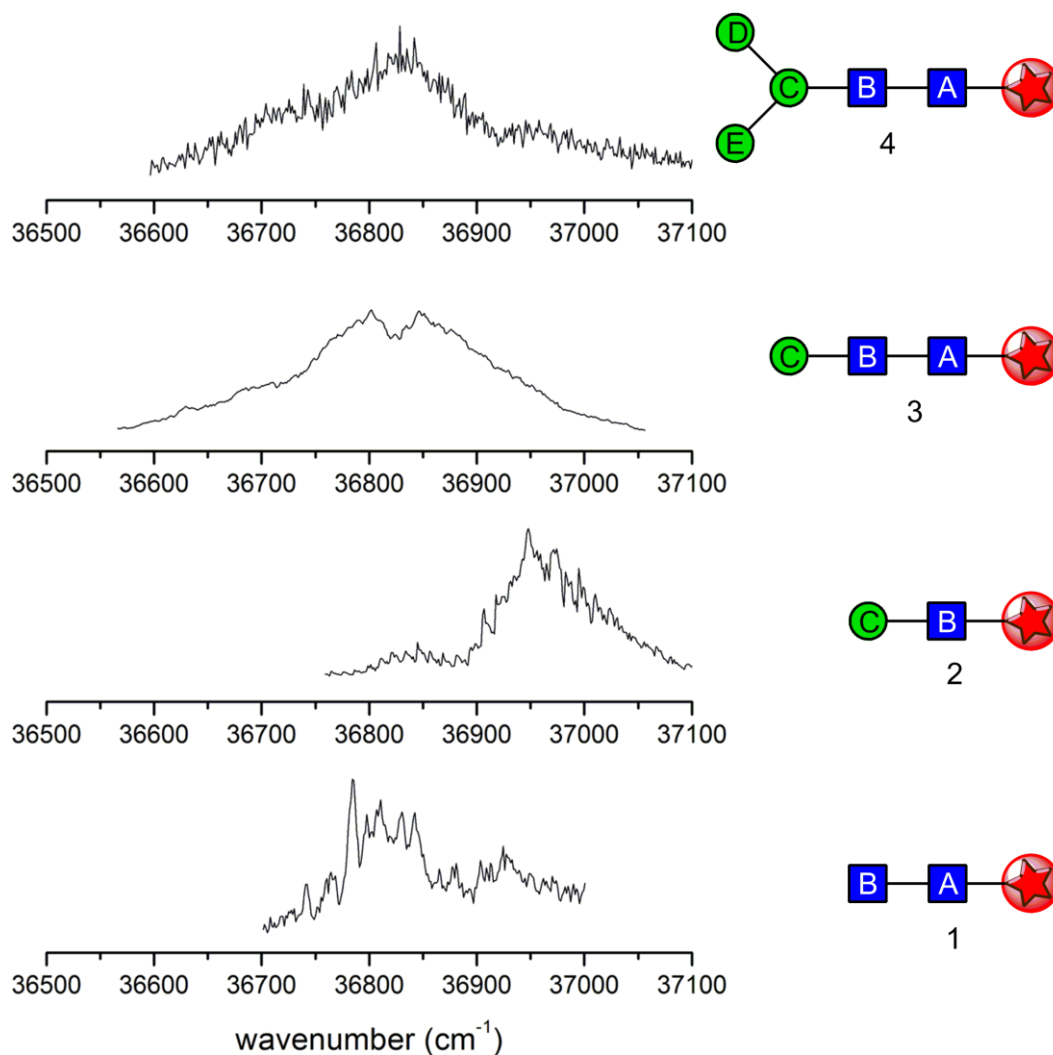

**Supplementary Figure S3.** Two-colour photo-ionisation spectrum of **1**, and R2PI spectra of **2**, **3** and **4**.

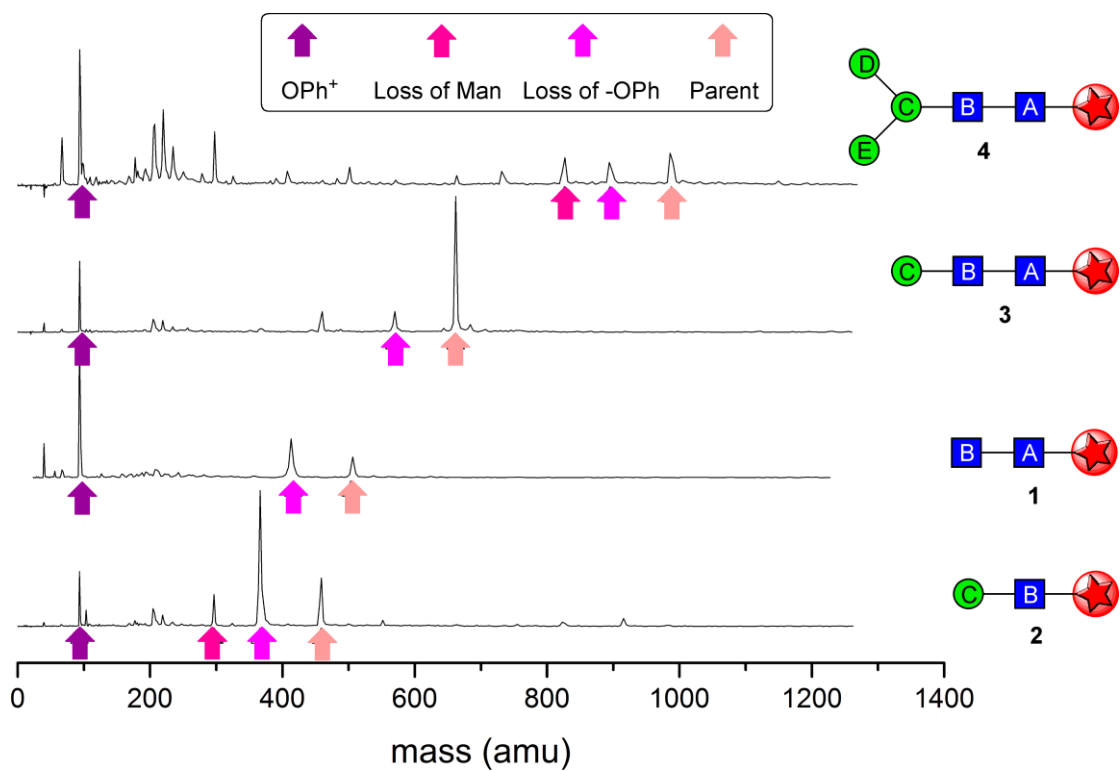

**Supplementary Figure S4.** Time of flight photoionisation mass spectra of 1-4.

## Lowest energy structures, relative- and free energies of **1** and **1**·**H<sub>2</sub>O**.

Calculated structures of **1** (GlcNAc- $\beta$ -1,4-GlcNAc- $\beta$ -1-OPh) and its mono-hydrate **1**·**H<sub>2</sub>O**. Calculated optimised structures were calculated using DFT (B3LYP/6-311+G\*). Relative energies (kJ mol<sup>-1</sup>), calculated using single point B3LYP//MP2/6-311++G\*\*, and corrected for zero point and free energy using the frequency calculations performed at the B3LYP level are shown in square brackets. Dihedral angles H1<sub>B</sub>-C1<sub>B</sub>-O1<sub>B</sub>-C4<sub>A</sub> and C1<sub>B</sub>-O1<sub>B</sub>-C4<sub>A</sub>-H4<sub>A</sub> are denoted by  $\phi$ ,  $\psi$  respectively.

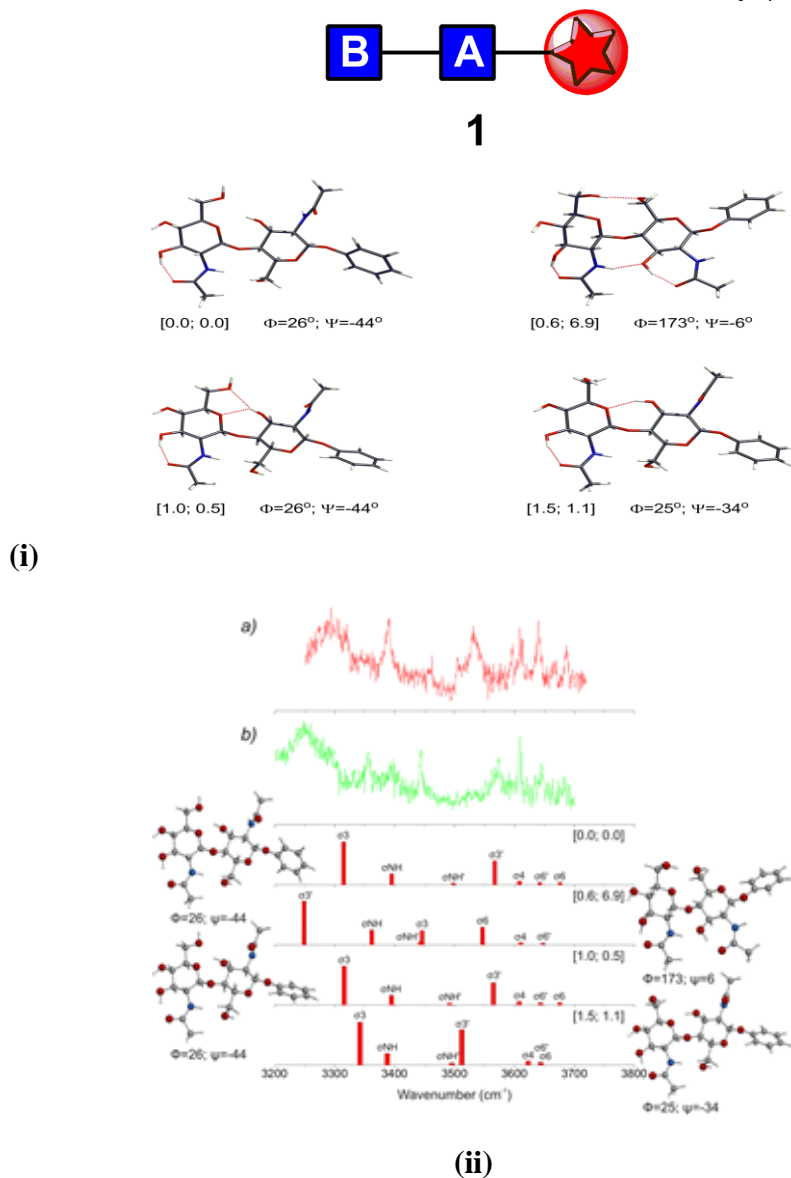

**Supplementary Figure S5. (i)** The computed lowest energy structures of **1**; relative- and free-energies (in brackets) are in kJ mol<sup>-1</sup> and dihedral angles ( $\phi$  and  $\psi$ ) are in degrees. **(ii)** The experimental (IRID) and computed vibrational spectra of the four lowest energy conformers. Note: the first and third structures only differ in the orientation of the phenyl ring.

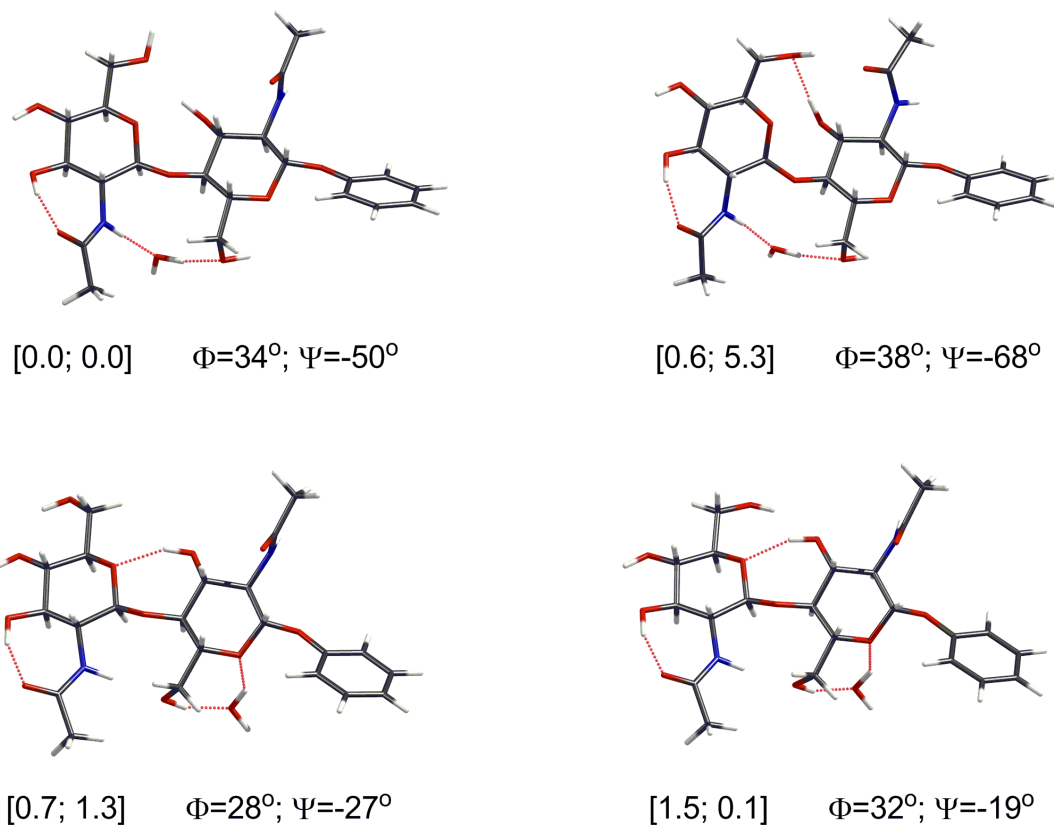

(i)

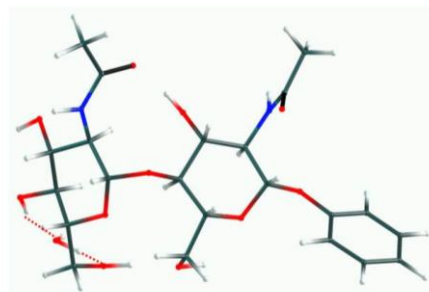

[4.5; 8.0]     $\Phi=162^\circ$ ;  $\Psi=2^\circ$

(ii)

**Supplementary Figure S6.** The computed lowest energy structures of (i), *trans* **1·H<sub>2</sub>O** and (ii) *cis* **1·H<sub>2</sub>O**. Relative energies and free-energies (in brackets) are in kJ mol<sup>-1</sup>; dihedral angles ( $\phi$  and  $\psi$ ) are in degrees.



## Lowest energy structures, relative- and free energies of **2**, **2·H<sub>2</sub>O**, **2-B** and **2-B·H<sub>2</sub>O**.

Calculated structures of **2** (Man- $\beta$ -1,4-GlcNAc- $\beta$ -1-OPh), its mono-hydrate **2·H<sub>2</sub>O**, the blocked disaccharide **2-B** (Man(6-OMe)- $\beta$ -1,4-GlcNAc- $\beta$ -1-OPh) and its mono-hydrate **2-B·H<sub>2</sub>O**. Optimised structures were calculated using DFT (B3LYP/6-311+G\*). Relative and free energies (kJ mol<sup>-1</sup> shown in square brackets) were calculated using single point B3LYP//MP2/6-311++G\*\*. Dihedral angles H1<sub>C</sub>-C1<sub>C</sub>-O1<sub>C</sub>-C4<sub>B</sub> and C1<sub>C</sub>-O1<sub>C</sub>-C4<sub>B</sub>-H4<sub>B</sub> are denoted by  $\phi$ ,  $\psi$  respectively.

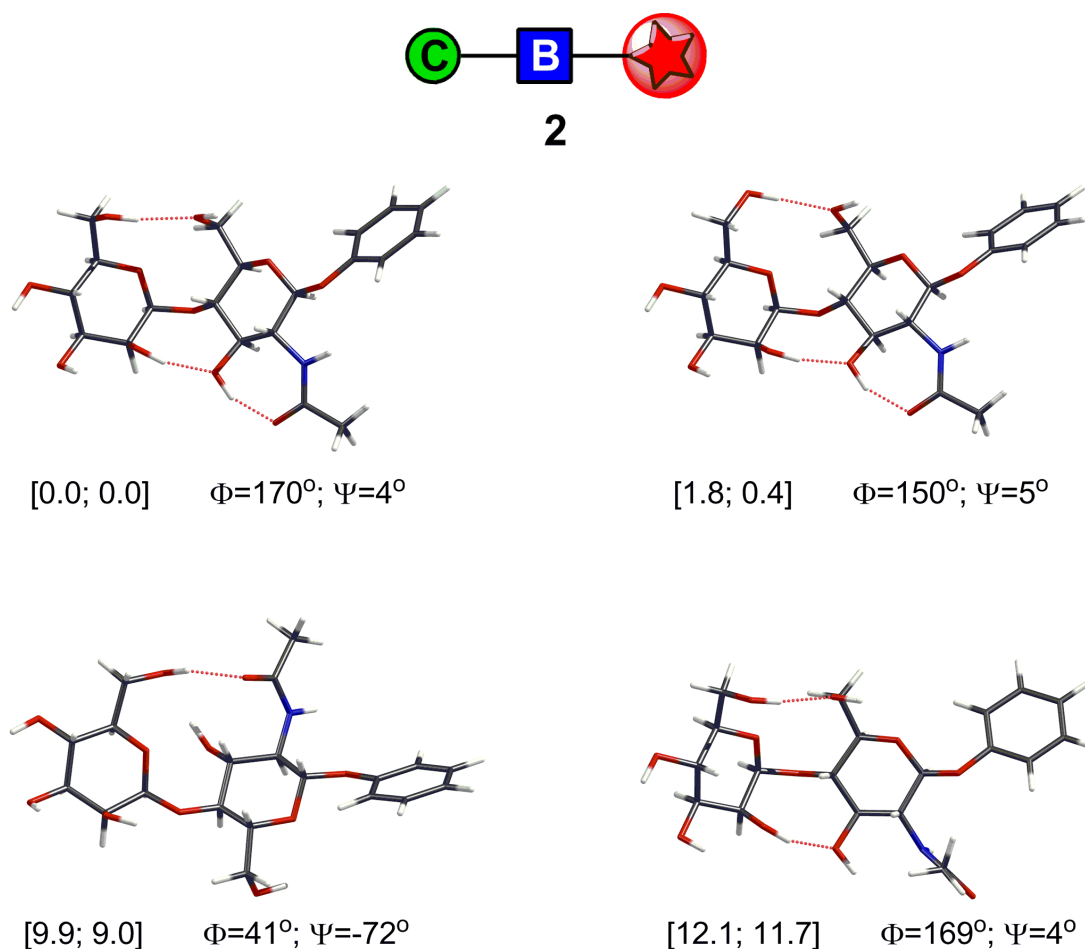

**Supplementary Figure S7.** The computed lowest energy structures of **2**; relative- and free-energies (in brackets) are in kJ mol<sup>-1</sup>, dihedral angles ( $\phi$  and  $\psi$ ) are in degrees.

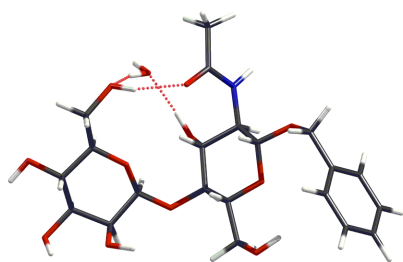

[0.0; 4.5]  $\Phi=42^\circ$ ;  $\Psi=-93^\circ$

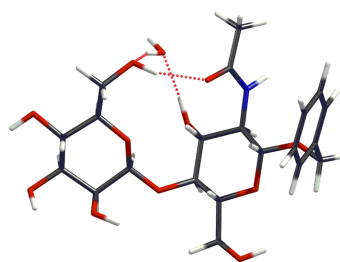

[0.9; 3.8]  $\Phi=40^\circ$ ;  $\Psi=-90^\circ$

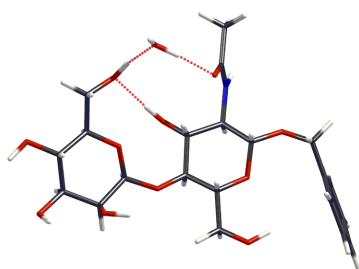

[1.7; 3.0]  $\Phi=37^\circ$ ;  $\Psi=-66^\circ$

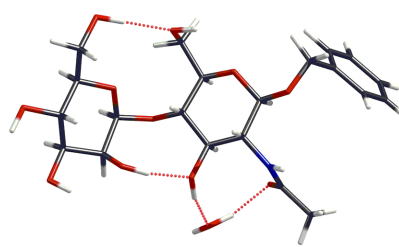

[2.9; 3.6]  $\Phi=156^\circ$ ;  $\Psi=3^\circ$

**Supplementary Figure S8.** The computed lowest energy structures of  $2\cdot\text{H}_2\text{O}$  (relative- and free-energies (in brackets) are in  $\text{kJ mol}^{-1}$ , dihedral angles ( $\phi$  and  $\psi$ ) are in degrees). *Note:* Calculated for the  $-O$ -benzyl glycoside.

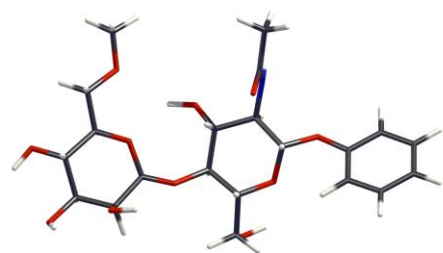

[0.0; 0.0]  $\Phi=35^\circ$ ;  $\Psi=-40^\circ$

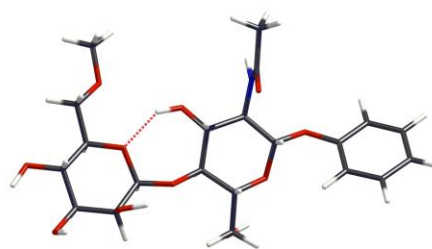

[0.9; 0.0]  $\Phi=38^\circ$ ;  $\Psi=-33^\circ$

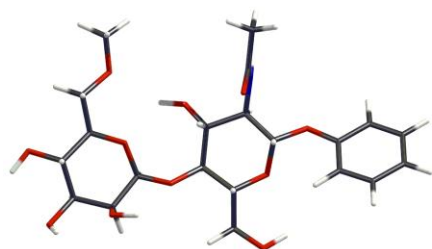

[1.8; 3.7]  $\Phi=36^\circ$ ;  $\Psi=-44^\circ$

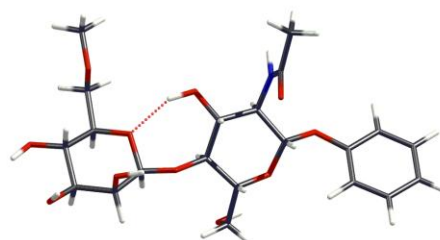

[2.0; 2.3]  $\Phi=50^\circ$ ;  $\Psi=-12^\circ$

**Supplementary Figure S9.** The computed lowest energy structures of **2-B** (relative- and free-energies (in brackets) are in  $\text{kJ mol}^{-1}$ , dihedral angles ( $\phi$  and  $\psi$ ) are in degrees).

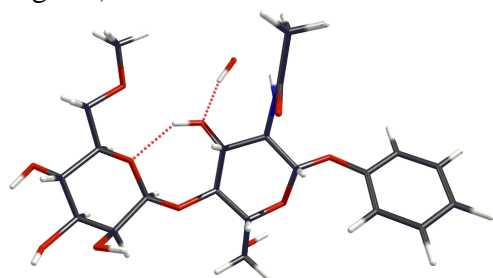

[0.0; 0.0]  $\Phi=36^\circ$ ;  $\Psi=-38^\circ$

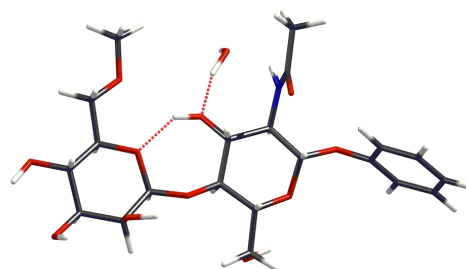

[1.0; 0.9]  $\Phi=36^\circ$ ;  $\Psi=-37^\circ$

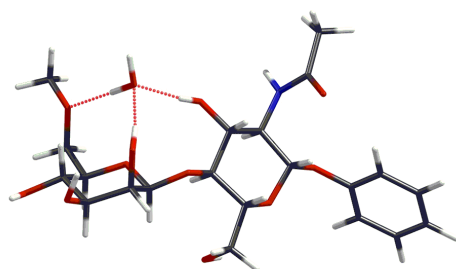

[2.9; 5.3]  $\Phi=54^\circ$ ;  $\Psi=13^\circ$

**Supplementary Figure S10.** The computed lowest energy structures of **2-B·H<sub>2</sub>O** (relative- and free-energies (in brackets) are in  $\text{kJ mol}^{-1}$ , dihedral angles ( $\phi$  and  $\psi$ ) are in degrees).

### Lowest energy structures, relative- and free energies of **3** and **3-B**.

Calculated structures of **3** (Man- $\beta$ -1,4-GlcNAc- $\beta$ -1,4-GlcNAc- $\beta$ -1-OPh) and its blocked trisaccharide **3-B** (Man(6-OMe)- $\beta$ -1,4-GlcNAc- $\beta$ -1,4-GlcNAc- $\beta$ -1-OPh). Calculated optimised structures and relative and free energies ( $\text{kJ mol}^{-1}$  shown in square brackets) were calculated using DFT (M06-2X/6-31+G\*). Free energies were determined at 298 K. Dihedral angles  $\text{H1}_C\text{-C1}_C\text{-O1}_C\text{-C4}_B$ ,  $\text{C1}_C\text{-O1}_C\text{-C4}_B\text{-H4}_B$ ,  $\text{H1}_B\text{-C1}_B\text{-O1}_B\text{-C4}_A$  and  $\text{C1}_B\text{-O1}_B\text{-C4}_C\text{-H4}_C$  are denoted by  $\phi_1$ ,  $\psi_1$ ,  $\phi_2$  and  $\psi_2$  respectively.

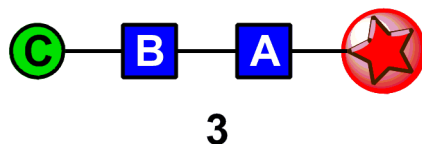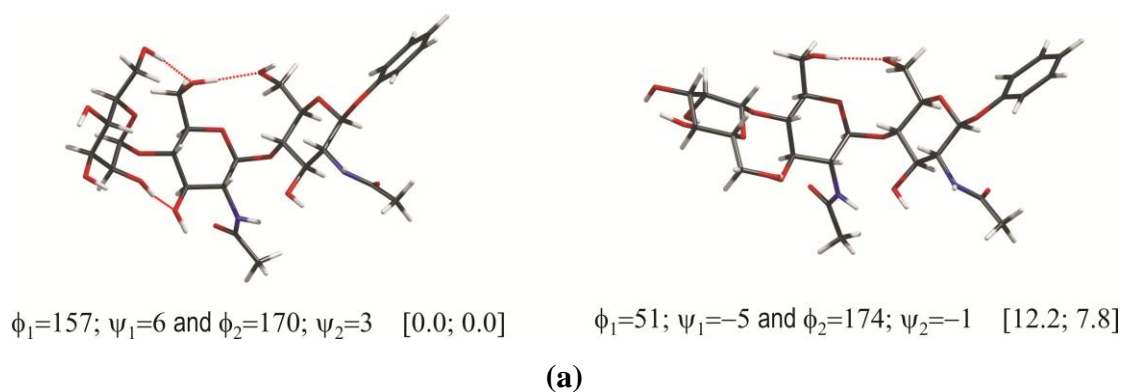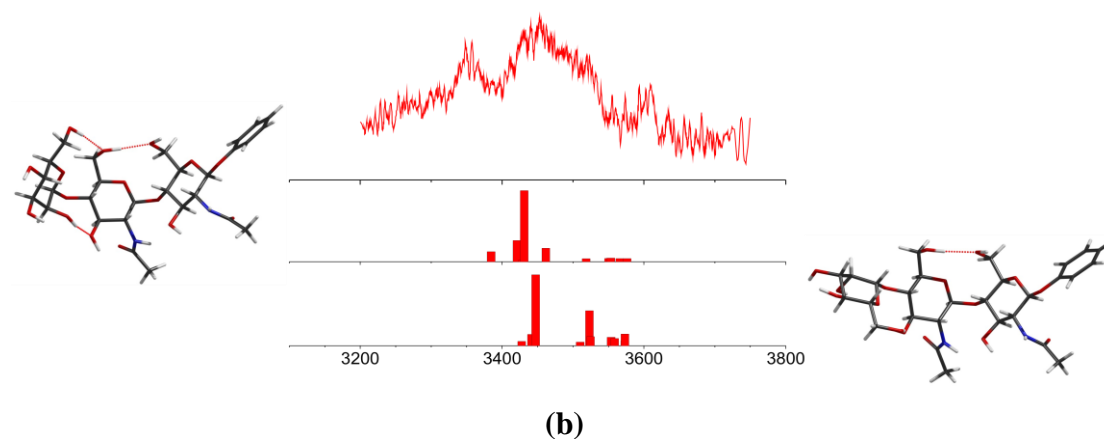

**Supplementary Figure S11.** **(a)** The computed lowest energy structures of **3** (relative- and free-energies (in brackets) are in  $\text{kJ mol}^{-1}$ , dihedral angles ( $\phi$  and  $\psi$ ) are in degrees). **(b)** The experimental (IRID) and computed vibrational spectra of the two lowest energy conformers.

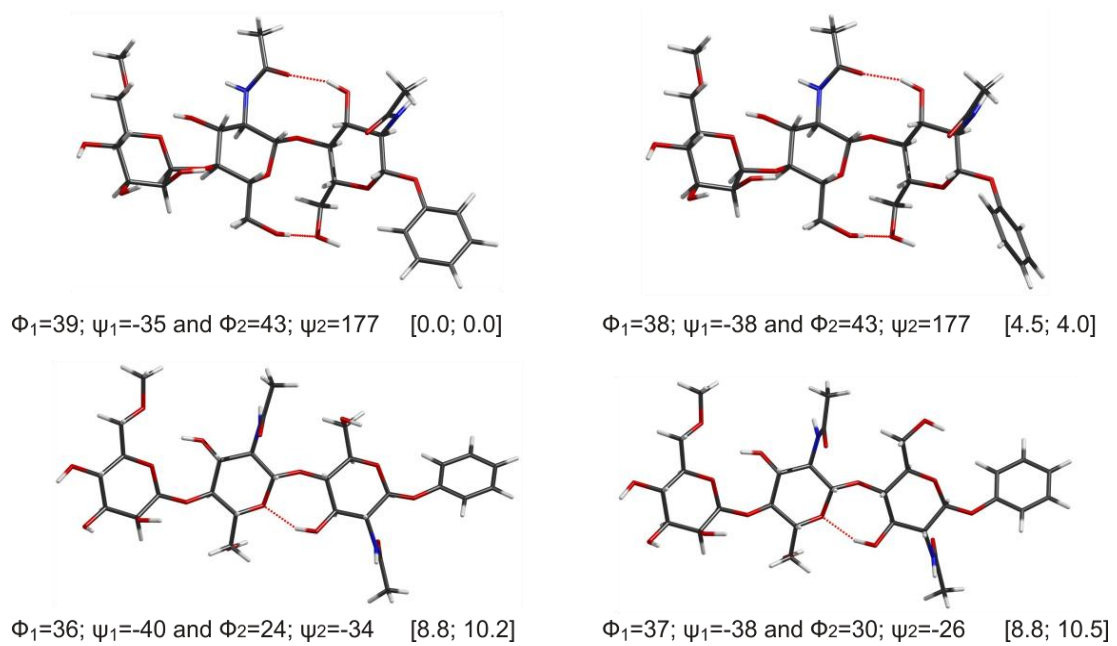

**Supplementary Figure S12.** The computed lowest energy structures of **3-B** (relative- and free-energies (in brackets) are in  $\text{kJ mol}^{-1}$ , dihedral angles ( $\varphi$  and  $\psi$ ) are in degrees).

## Hydrogen bonding distributions of **4**, obtained from MM/OPLS2005 calculations (see pp. S21-S22)

An analysis of the number of hydrogen bonds ( $r[\text{OH}\cdots\text{O}] > 2.5\text{\AA}$ ,  $\theta[\text{OH}\cdots\text{O}] > 120^\circ$ ) present for each converged structure within 30 kJ/mol of the global minimum was conducted for **4** in the gas phase, explicitly hydrated with three water molecules, and in bulk water (Supplementary Figure S13). An optimum of 6-8 intra-molecular hydrogen bonds was found in the gas phase structures. The addition of three water molecules was seen to increase the importance of hydrogen bonding in the low energy structures, allowing for an optimal number of 10-13 hydrogen bonds (including bonds to the water molecules). In the bulk simulation intra-molecular hydrogen bonds are replaced with hydrogen bonds to the bulk solvent. The optimum number of intra-molecular hydrogen bonds was seen to decrease to just 2-4 in the low energy ensemble.

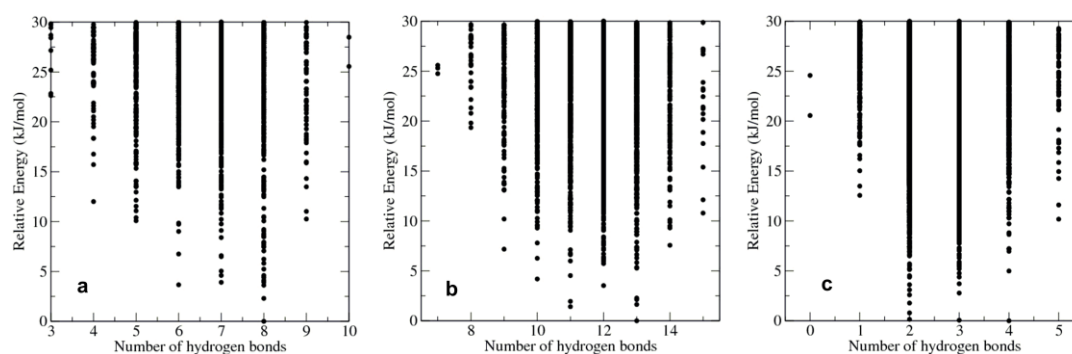

**Supplementary Figure S13.** Hydrogen bonding patterns for **4** in (a) gas phase, (b) explicitly hydrated, and (c) bulk water.

## Molecular shape/size distributions of **4**, obtained from MM/OPLS2005 calculations (see pp. S21-S22)

In addition to using the longest intramolecular distances as an indicator of the molecular conformations (main text), the molecular length and width of the core pentasaccharide (without the *O*-phenyl glycoside) were also measured by identifying an approximate length (the distance between C1<sub>A</sub> of GlcNAc and C4<sub>C</sub> of the bridging mannose) and an approximate width (the distance between C4<sub>D</sub> of the C3-linked mannose and C3<sub>E</sub> of the C6 linked mannose) (Supplementary Figure S14). In the gas phase the shortest molecular length distribution indicates compact structures which become increasingly extended in explicitly hydrated and bulk water simulations. The explicitly hydrated core-pentasaccharide **4** shows a bimodal distribution which reflects the potential for mannose-E to fold back to interact with the chitobiose stem, although there is no conserved water insertion structure associated with each distribution.

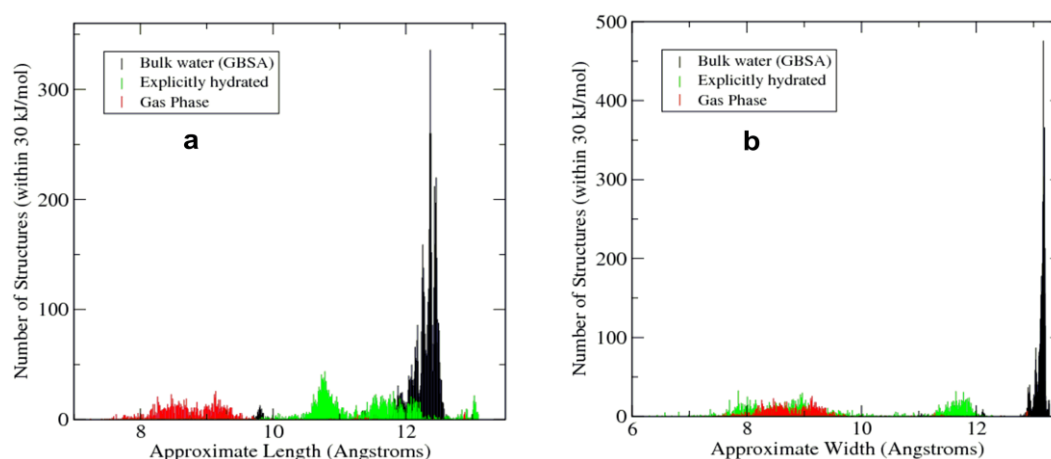

**Supplementary Figure S14:** (a) Approximate molecular length and (b) approximate molecular width of the core pentasaccharide **4** in bulk water (black), explicitly hydrated (green) and in the gas phase (red).

The molecular widths provide an approximate estimate of how widely separated the branching mannose groups are from each other, even if this separation is achieved by folding back along the chitobiose stem. The bulk water structures show decreased flexibility and the largest separation of the mannose head groups. The explicitly hydrated width varies with a bimodal distribution; the longer distance

relates to structures where the mannose-E head group folds back in interaction with the chitobiose stem creating a larger perceived width. The gas phase structures, and the majority of the explicitly hydrated structures, favour compact conformations in comparison to those adopted in bulk solution.



## Supplementary Methods

### General Experimental

Optical rotations were measured on a Perkin-Elmer 241 polarimeter with a path length of 1.0 dm and are reported with implied units of  $10^{-1}$  deg  $\text{cm}^2 \text{g}^{-1}$ . Concentrations (*c*) are given in g/100 mL.

Melting points (m.p.) were recorded on a Leica Galen III hot stage microscope equipped with a Testo 720 thermocouple probe and are uncorrected.

Proton nuclear magnetic resonance ( $^1\text{H}$  NMR) spectra were recorded on a Bruker DPX400 (400 MHz), a Bruker AV400 (400 MHz) or a Bruker AVII500 (500 MHz) spectrometer, as indicated. Carbon nuclear magnetic resonance ( $^{13}\text{C}$  NMR) spectra were recorded on a Bruker AV400 (100 MHz) spectrometer or on a Bruker AVII500 (125 MHz) spectrometer, as indicated. NMR Spectra were fully assigned using COSY, HSQC, HMBC and DEPT 135. All chemical shifts are quoted on the  $\delta$  scale in ppm using residual solvent as the internal standard ( $^1\text{H}$  NMR:  $\text{CDCl}_3 = 7.26$ ,  $\text{CD}_3\text{OD} = 4.87$ ;  $\text{DMSO-}d_6 = 2.50$  and  $^{13}\text{C}$  NMR:  $\text{CDCl}_3 = 77.0$ ;  $\text{CD}_3\text{OD} = 49.0$ ;  $\text{DMSO-}d_6 = 39.5$ ). Coupling constants (*J*) are reported in Hz with the following splitting abbreviations: s = singlet, d = doublet, t = triplet, q = quartet, quin = quintet, and a = apparent.

Infrared (IR) spectra were recorded on a Bruker Tensor 27 Fourier Transform spectrophotometer using thin films on NaCl plates for liquids and oils and KBr discs for solids and crystals. Absorption maxima ( $\nu_{\text{max}}$ ) are reported in wavenumbers ( $\text{cm}^{-1}$ ) and classified as strong (s) or broad (br).

Low resolution mass spectra (LRMS) were recorded on a Waters Micromass LCT Premier TOF spectrometer using electrospray ionization (ESI) and high resolution mass spectra (HRMS) were recorded on a Bruker MicroTOF ESI mass spectrometer. Nominal and exact *m/z* values are reported in Daltons.

Thin layer chromatography (TLC) was carried out using Merck aluminium backed sheets coated with 60F<sub>254</sub> silica gel. Visualization of the silica plates was achieved using a UV lamp ( $\lambda_{\text{max}} = 254 \text{ nm}$ ), and/or acid dip (1:1 MeOH/H<sub>2</sub>O, 10% H<sub>2</sub>SO<sub>4</sub>) and/or ammonium molybdate 5% in 2M H<sub>2</sub>SO<sub>4</sub>, and/or potassium permanganate (5% KMnO<sub>4</sub> in 1M NaOH with 5% potassium carbonate). Column chromatography was carried out using BDH PROLAB<sup>®</sup> 40-63 mm silica gel (VWR). Mobile phases are reported in ratio of solvents (e.g. 4:1 petrol/ ethyl acetate)

Anhydrous solvents were purchased from Fluka or Acros with the exception of dichloromethane and THF, which were dried over alumina cartridges. All other solvents were used as supplied (Analytical or HPLC grade), without prior purification. Distilled water was used for chemical reactions and Milli-Q<sup>™</sup> purified water for protein manipulations. Reagents were purchased from Sigma Aldrich and used as supplied, unless otherwise indicated. 'Petrol' refers to the fraction of light petroleum ether boiling in the range 40–60 °C. All reactions using anhydrous conditions were performed using flame-dried apparatus under an atmosphere of argon or nitrogen. 3Å and 4Å molecular sieves were activated by heating in a 400 °C furnace and were also employed for anhydrous reactions. Brine refers to a saturated solution of sodium chloride. Anhydrous magnesium sulfate (MgSO<sub>4</sub>) or sodium sulfate (Na<sub>2</sub>SO<sub>4</sub>) were used as drying agents after reaction workup, as indicated. DOWEX 50WX8 (H<sup>+</sup> form) was conditioned as follows: 100 g of the commercial resin was placed in a 500 mL sintered filter funnel and allowed to swell with 200 mL of acetone for 5 minutes. The solvent was removed by suction and the resin was washed successively with 800 mL of acetone, 500 mL methanol, 500 mL 5M HCl, and then 1 L of water or until the pH of filtrate was ~ 7, as indicated by pH paper. The resin was partially dried on the filter and then stored and used as needed.

Molecular beam spectroscopy of carbohydrates was performed as follows. The carbohydrates were mixed with graphite powder or carbon black, and vaporized into a supersonic jet of argon using a home-built laser desorption system. The expanding jet passed through a 2 mm skimmer to create a collimated molecular beam which intersected tuneable UV and IR laser beams in the extraction region of a linear time-

of-flight mass spectrometer (Jordan). One, or two colour, mass-selected photoionisation spectra, recorded using a frequency-doubled pulsed Nd:YAG-pumped dye laser operating at 10 Hz, were followed by conformer-specific spectroscopy in the UV and IR using UV-UV and IR-UV ion dip (IRID) double resonance spectroscopy. The tuneable IR radiation was provided by a second dye laser using difference frequency generation in a LiNbO<sub>3</sub> crystal (Continuum Powerlite 8010/ND6000/IRP module) or directly, using an OPO/OPA laser system (LaserVision). The delay between the pump and the probe laser pulses was ~150 ns in both the IRID and UV-UV double resonance experiments.

## Computational Strategies

The structural conformational search followed an iterative approach. The spectroscopic calculations began with completely unrestricted and exhaustive surveys of the conformational landscapes of each of the carbohydrate ‘building blocks’, and their singly hydrated complexes, using a molecular mechanics method (MMFFs-force field)<sup>[1]</sup> until no additional new structures were obtained. Water molecules were free to find their most favoured binding sites. Their conformers were identified with the advanced hybrid<sup>[2]</sup> Large-Scale Low-Mode<sup>[3]</sup>/Monte Carlo algorithm<sup>[4]</sup> (LM/MC) (see p. S21) implemented in MacroModel, v.9.2, Schrödinger, LLC21.<sup>[5]</sup> These surveys, generated 2000-5000 structures depending on the system (<25 kJ mol<sup>-1</sup>). The initial sets of structures were grouped into families. The ~50 lowest-lying energy conformers (<15 kJ mol<sup>-1</sup>) and a representative member of each group that might have a significant population in the cooled adiabatic expansion (typically ~100 structures), were re-optimized through density functional theory calculations (B3LYP/6-311+G\*) using the Gaussian 09 program package<sup>[6]</sup> to provide a new energy ranking of the lowest energy structures and their associated harmonic vibrational spectra. Zero-point corrected relative energies were computed through subsequent single point ab initio calculations (MP2/6-311++G\*\*) and final optimizations were based upon comparisons with the experimental spectra themselves, to provide feedback and guide the ‘fine-tuning’ of the predicted structures. Calculations at the MP2 level were not feasible for the bare and ‘blocked’ trisaccharides, **3** and **3-B**, and dispersion was taken into account using the M06-2X functional, to obtain fully optimized structures, frequencies and relative energies. The quantum mechanical calculations used the Gaussian09 package running in two supercomputers employing a maximum of 96 processors per calculation.

Vibrational, structural and conformational assignments were based primarily on the level of correspondence between the experimental and computed OH vibrational spectra, scaled by the ‘anharmonicity’ factors, 0.9734 (OH) and 0.9600 (NH), to bring them into better accord with experiment. The best agreement between experiment and theory for the most strongly populated structures corresponded, in all cases, with the calculated minimum energy structures.

## Conformational analysis of the core pentasaccharide, **4**.

The gas phase conformational preferences of the core pentasaccharide **4**, were investigated using (a) the OPLS2005 force field<sup>[7]</sup> of Macromodel version 9.5<sup>[5]</sup> selected after a series of evaluations of alternative fields<sup>1</sup> using the known conformational preferences of **1** as a reference (Figure 3a, main text), and (b) the GLYCAM06 force field<sup>[8]</sup>, specifically parameterized for carbohydrates. (Note: a recent investigation<sup>[9]</sup> of a range of alternative force fields found OPLS2005 and GLYCAM (using the 2006 parameters) to be similar in terms of disaccharide characterisation).

The potential energy surface (PES) was exhaustively sampled, again using the 1:1 hybrid Low Mode Monte Carlo (LM/MC) conformational sampling technique. The MC step randomly varied between 2 to 56 of the torsions (Supplementary Figure S15). Each LM step explored the potential in the vicinity of a minimum by taking random steps between 3-6 Å along the 10 lowest eigenvectors. All chiral centres were preserved in the conformational search, and amide bonds were constrained to trans geometry. The ring-opening method of Still<sup>[10]</sup> was used to explore additional ring conformations.

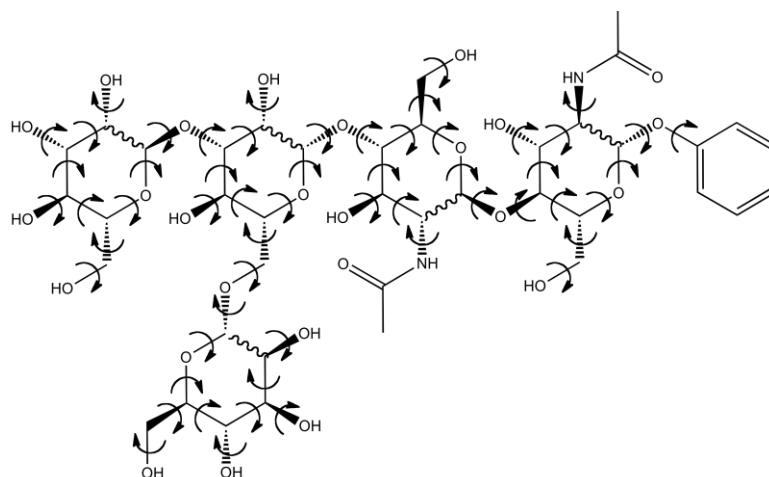

**Supplementary Figure S15:** Conformational search strategy for the core-pentasaccharide, **4**. Torsions varied in the conformation search indicated by arrows, bond breaking indicated by wavy bonds.

New structures were evaluated *via* heavy atom and polar hydrogen superposition with previously found conformers. Structures were saved as unique

S21

<sup>1</sup> The OPLS2005 force field possessed the fewest low quality stretch, bend and torsional parameters.

provided a minimum distance of 0.25 Å between atom pairs. Each structure was subjected to 500 steps of the Truncated Newton Conjugate Gradient<sup>[11]</sup> (TNCG) minimization method. LM/MC searching was performed in 5000 step blocks. Exhaustive PES sampling was achieved by monitoring the convergence of the global minimum energy and the number of converged structures found, as well as by an increase in the frequency of global minimum sampling. In each subsequent CS block, the least sampled structure was used as a starting point for additional LM/MC steps. Conformational searches were similarly performed to determine solvent effects. Bulk water simulations were performed using the Generalized Born Surface Area<sup>[12]</sup> (GBSA) continuum solvation model in conjunction with the OPLS2005s or GLYCAM06 force field. Subsequent calculations, performed to determine the effect of hydration in the gas phase, included explicitly hydrated complexes incorporating three water molecules located at binding sites based upon the lowest energy preferences of singly hydrated trimannose<sup>[13]</sup>, chitobiose **1**, and Man-β-1,4-GlcNAc-β-1-OPh **2** (Figure 4, main text). Water molecules were allowed translational freedom of 1 Å. For the gas phase CS, 175,000 steps were used to achieve convergence and 1420 minimized structures were obtained within 30 kJ/mol of the global minimum. The bulk water and explicitly hydrated conformational searches required 75,000 steps for convergence and resulted in 6146 and 2740 structures within 30 kJ mol<sup>-1</sup> of the global minimum, respectively.

## Supplementary chemistry schemes, synthesis and characterization

### General Synthetic Considerations

The hexose rings of all compounds are defined A – E as detailed below. These definitions are used throughout to denote the hexose rings in the characterisation of compounds. Compounds **11**<sup>[14]</sup>, **34**<sup>[15]</sup> and **46**<sup>[16]</sup> were synthesized as has been recorded previously and their characterization matched previously reported spectroscopic data.

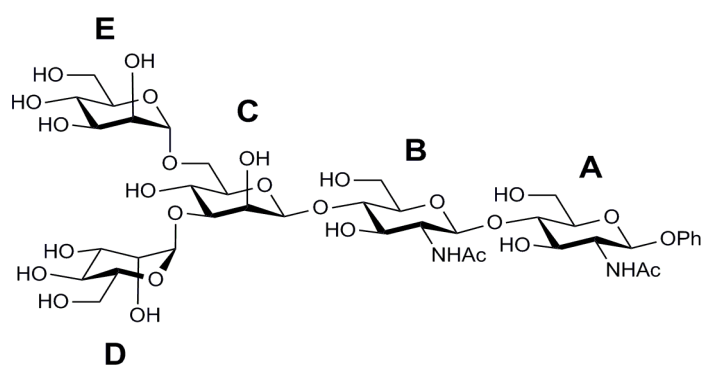

## Synthesis of compound 1.

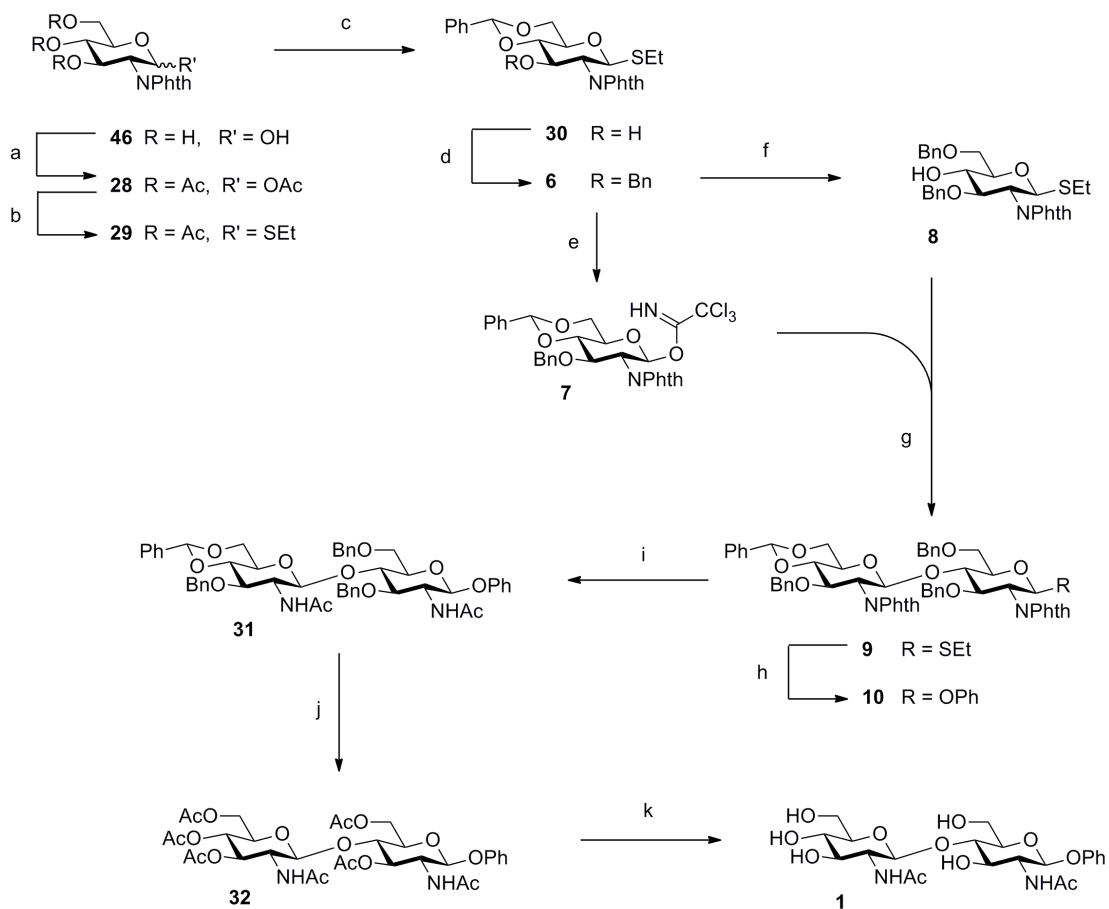

*Reagents and conditions:* a) Ac<sub>2</sub>O, pyridine, rt, 67%; b) EtSH, TMS-OTf, DCM, rt, 74%; c) i- NaOMe, MeOH, rt, ii- benzaldehyde dimethylacetal, TsOH.H<sub>2</sub>O, MeCN, rt, 87%; d) NaH, BnBr, TBAI, DMF, rt, 91%; e) i- NBS, acetone/water, -10 °C, ii- Cl<sub>3</sub>CCN, DBU, DCM, rt, 84%; f) NaCNBH<sub>3</sub>, THF, 0 °C, 82%; g) TMS-OTf, 4 Å MS, DCM, -78 °C, 89%; h) ) PhOH, NIS, TMS-OTf, 4 Å MS, DCM, 0 °C, 37%; i) i- 1,2-ethylenediamine, MeOH, 80 °C, ii- Ac<sub>2</sub>O, pyridine, rt, 66%; j) i- H<sub>2</sub>, Pd(OH)<sub>2</sub>, MeOH, rt, ii- Ac<sub>2</sub>O, pyridine, rt, 92%; k) NaOMe, MeOH, rt, 94%.



### Acetyl-3,4,6-tri-*O*-acetyl-2-deoxy-2-*N*-phthalamido- $\beta$ -D-glucopyranoside<sup>[17]</sup>

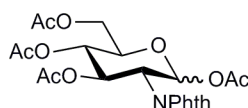

Acetic anhydride (147.4 ml, 1559.8 mmol) was added dropwise to a suspension of 2-deoxy-2-*N*-phthalamido- $\beta$ -D-glucopyranoside<sup>[16]</sup> **46** (88.0 g, 283.6 mmol) in dry pyridine (750 ml) at rt under an atmosphere of nitrogen. The mixture was stirred for 25h at rt then concentrated *in vacuo*. The resulting oil was dissolved in DCM (600 ml) and washed successively with water (300 ml), 1M hydrochloric acid (3x 300 ml), saturated aqueous sodium hydrogencarbonate (300 ml) and brine (2x 300 ml). The organic layer was dried (MgSO<sub>4</sub>), filtered and concentrated *in vacuo* to give acetyl-3,4,6-tri-*O*-acetyl-2-deoxy-2-*N*-phthalamido- $\beta$ -D-glucopyranoside **28** (91.2 g, 67%) as a pale yellow oil ( $\alpha/\beta$  ~2:1);  $\delta_{\text{H}}$  (400 MHz, CDCl<sub>3</sub>) **28- $\alpha$** : 1.86 (3H, s), 2.05 (3H, s), 2.08 (3H, s), 2.11 (3H, s), 4.12 (1H, dd, *J* 12.3, 1.5, 6-*HH*), 4.30 (1H, ddd, *J* 9.9, 4.0, 1.5, 5-H), 4.35 (1H, dd, *J* 12.3, 4.0, 6-*HH*), 4.71 (1H, dd, *J* 11.6, 3.3, 2-H), 5.20 (1H, dd, *J* 9.9, 9.2, 4-H), 6.27 (1H, d, *J* 3.5, 1-H), 6.55 (1H, dd, *J* 11.4, 9.2, 3-H), 7.71-7.77 (2H, m), 7.81-7.88 (2H, m);  $\delta_{\text{C}}$  (100 MHz, CDCl<sub>3</sub>) 20.4 (-OAc), 20.6 (-OAc), 20.64 (2x -OAc), 20.7 (2x -OAc), 20.8 (-OAc), 52.8 (C-2 $\alpha$ ), 53.47 (C-2 $\beta$ ), 61.5 (C-6 $\alpha$ ), 65.8 (C-6 $\beta$ ), 67.0 (C-3 $\alpha$ ), 68.3 (C-4 $\beta$ ), 69.4 (C-4 $\alpha$ ), 70.2 (C-5 $\alpha$ ), 70.5 (C-3 $\beta$ ), 72.6 (C-5 $\beta$ ), 89.7 (C-1 $\alpha$ ), 90.5 (C-1 $\beta$ ), 123.7, 123.8, 131.2, 134.5, 168.6, 169.3, 169.46, 169.52, 169.8, 170.0, 170.7; *m/z* (ES<sup>+</sup>) 495.17 ([M.NH<sub>4</sub>]<sup>+</sup>, 27%), 500.11 ([M.Na]<sup>+</sup> 77%), 977.18 ([2M.Na]<sup>+</sup> 100%);  $\delta_{\text{H}}$  (400 MHz, CDCl<sub>3</sub>) **28- $\beta$** : 1.85 (3H, s), 1.99 (3H, s), 2.03 (3H, s), 2.10 (3H, s), 4.02 (1H, ddd, *J* 10.2, 4.0, 1.8, 5-H), 4.13 (1H, dd, *J* 12.3, 1.8, 6-*HH*), 4.28-4.32 (1H, m, 6-*HH*), 4.46 (1H, dd, *J* 10.3, 8.9, 2-H), 5.15 (1H, dd, *J* 10.1, 9.1), 5.87 (1H, dd, *J* 10.1, 9.1), 6.50 (1H, d, *J* 8.9, 1-H), 7.71-7.77 (2H, m), 7.81-7.88 (2H, m);  $\delta_{\text{C}}$  (100 MHz, CDCl<sub>3</sub>) 20.4 (-OAc), 20.6 (-OAc), 20.64 (2x -OAc), 20.7 (2x -OAc), 20.8 (-OAc), 52.8 (C-2 $\alpha$ ), 53.47 (C-2 $\beta$ ), 61.5 (C-6 $\alpha$ ), 65.8 (C-6 $\beta$ ), 67.0 (C-3 $\alpha$ ), 68.3 (C-4 $\beta$ ), 69.4 (C-4 $\alpha$ ), 70.2 (C-5 $\alpha$ ), 70.5 (C-3 $\beta$ ), 72.6 (C-5 $\beta$ ), 89.7 (C-1 $\alpha$ ), 90.5 (C-1 $\beta$ ), 123.7, 123.8, 131.2, 134.5, 168.6, 169.3, 169.46, 169.52, 169.8, 170.0, 170.7; *m/z* (ES<sup>+</sup>) 495.17 ([M.NH<sub>4</sub>]<sup>+</sup>, 27%), 500.11 ([M.Na]<sup>+</sup> 77%), 977.18 ([2M.Na]<sup>+</sup> 100%).

### Ethyl-3,4,6-tri-*O*-acetyl-2-deoxy-2-*N*-phthalamido-1-thio- $\beta$ -D-glucopyranoside<sup>[18]</sup>

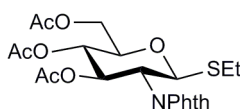

Trimethylsilyl-trifluoromethanesulfonate (3.33 ml, 18.4 mmol) was added slowly to a solution of acetyl-3,4,6-tri-*O*-acetyl-2-deoxy-2-*N*-phthalamido- $\beta$ -D-glucopyranoside **28** (8.00 g, 16.7 mmol) and ethanethiol (2.23 ml, 30.1 mmol) in dry DCM (80 ml) at rt under an atmosphere of nitrogen. The mixture was stirred at rt for 24h whereupon TLC analysis (50% EtOAc/Petrol) indicated complete consumption of starting material and formation of a product ( $R_f=0.55$ ). Triethylamine (5 ml) was added and the mixture was stirred for 20 min. The mixture was added to saturated aqueous sodium hydrogen carbonate solution (200 ml) and DCM (100 ml). The layers were separated and the aqueous layer was extracted with DCM (2x 80 ml). The combined organic layers were washed with saturated aqueous sodium hydrogencarbonate solution (100 ml) and brine (100 ml), dried ( $MgSO_4$ ), filtered and concentrated *in vacuo* to give a pale yellow oil which was purified by flash column chromatography on silica gel eluting with 40% EtOAc/petrol to give ethyl-3,4,6-tri-*O*-acetyl-2-deoxy-2-*N*-phthalamido-1-thio- $\beta$ -D-glucopyranoside **29** as a white solid (5.9g, 74%); m.p. 115-117 °C;  $[\alpha]_D^{25} +39.5$  ( $c=1.0$ ,  $CHCl_3$ ) [lit.  $[\alpha]_D^{22} +44.0$  ( $c=0.8$ ,  $CHCl_3$ )<sup>[18]</sup>];  $\delta_H$  (400 MHz,  $CDCl_3$ ) 1.22 (3H, t,  $J$  7.4,  $-CH_2CH_3$ ), 1.86 (3H, s,  $-OAc$ ), 2.03 (3H, s,  $-OAc$ ), 2.10 (3H, s,  $-OAc$ ), 2.66 (1H, dq,  $J$  12.6, 7.4,  $-SCHH-$ ), 2.72 (1H, dq,  $J$  12.6, 7.4,  $-SCHH-$ ), 3.90 (1H, ddd,  $J$  10.1, 5.0, 1.9, 5-*H*), 4.17 (1H, dd,  $J$  12.3, 1.9, 6-*HH*), 4.31 (1H, dd,  $J$  12.3, 5.0, 6-*HH*), 4.39 (1H, app t,  $J$  10.5, 2-*H*), 5.18 (1H, dd,  $J$  10.1, 9.0, 4-*H*), 5.49 (1H, d,  $J$  10.5, 1-*H*), 5.83 (1H, dd,  $J$  10.5, 9.0, 3-*H*), 7.71-7.78 (4H, m, 4x Ar-*H*), 7.82-7.90 (4H, m, 4x Ar-*H*);  $\delta_C$  (100 MHz,  $CDCl_3$ ) 14.9 ( $-SCH_2CH_3$ ), 20.5 ( $-OAc$ ), 20.6 ( $-OAc$ ), 20.8 ( $-OAc$ ), 24.4 ( $-SCH_2CH_3$ ), 53.7 (C-2), 62.3 (C-6), 68.9 (C-4), 71.5 (C-3), 75.9 (C-5), 81.2 (C-1), 123.7, 131.1, 131.6, 134.3, 134.4, 167.2, 167.8, 169.5, 170.1, 170.7;  $m/z$  ( $ES^-$ ) 478.15 ( $[M-H]^-$ , 100%).

**Ethyl-4,6-*O*-benzylidene-2-deoxy-2-*N*-phthalamido-1-thio- $\beta$ -D-glucopyranoside<sup>[19]</sup>**

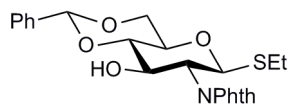

Sodium methoxide (138 mg, 2.4 mmol) was added to a solution of ethyl-3,4,6-tri-*O*-acetyl-2-deoxy-2-*N*-phthalamido-1-thio- $\beta$ -D-glucopyranoside **29** (23.0 g, 48.0 mmol) in dry methanol (175 ml) at rt under an atmosphere of nitrogen. The mixture was stirred for 16h then activated Dowex-H<sup>+</sup> (~4g) was added. The mixture was stirred for 1h then filtered and concentrated *in vacuo* to give a white foam (16.82 g) which was dissolved in dry acetonitrile (300 ml) at rt under an atmosphere of nitrogen. *p*-Benzaldehyde dimethylacetal (13.93 ml, 98.2 mmol) and TsOH.H<sub>2</sub>O (265 mg, 1.4 mmol) were added and the mixture was stirred for 65h whereupon TLC analysis (30% EtOAc/petrol) indicated complete consumption of the starting material and formation of a product ( $R_f=0.29$ ). Triethylamine (3 ml) was added, the mixture was stirred for an additional 1h and then concentrated *in vacuo*. The resulting oil was partitioned between DCM (250 ml) and saturated aqueous sodium hydrogencarbonate solution (200 ml). The layers were separated and the aqueous layer was extracted with DCM (4x 75 ml). The combined organic layers were washed with brine (2x 150 ml), dried (MgSO<sub>4</sub>), filtered and concentrated *in vacuo* to give a brown oil which was purified by flash column chromatography on silica gel eluting with 2% MeOH/DCM to give a yellow solid which was further purified by recrystallisation from diethyl ether/petrol to give ethyl-4,6-*O*-benzylidene-2-deoxy-2-*N*-phthalamido-1-thio- $\beta$ -D-glucopyranoside **30** as a white solid (17.8g, 87%); [ $\alpha$ ]<sub>D</sub><sup>25</sup> -5.3 (c=1.0, CHCl<sub>3</sub>) [lit. [ $\alpha$ ]<sub>D</sub><sup>25</sup> -5.0 (c=1.2, CHCl<sub>3</sub>)<sup>[19]</sup>];  $\delta_H$  (400 MHz, CDCl<sub>3</sub>) 1.20 (3H, t, *J* 7.5, -CH<sub>3</sub>), 2.66 (1H, dq, *J* 12.5, 7.5, -SCHH-), 2.73 (1H, dq, *J* 12.5, 7.5, -SCHH-), 3.61 (1H, t, *J* 9.1, 4-H), 3.70 (1H, td, *J* 9.7, 4.8, 5-H), 3.81 (1H, t, *J* 10.2, 6-HH), 4.33 (1H, t, *J* 10.2, 2-H), 4.40 (1H, dd, *J* 10.2, 4.8, 6-HH), 4.66 (1H, dd, *J* 9.7, 9.1, 3-H), 5.41 (1H, d, *J* 10.6, 1-H), 5.58 (1H, s, Ph-CH-), 7.36-7.41 (3H, m), 7.47-7.53 (2H, m), 7.70-7.76 (2H, m), 7.82-7.91 (2H, m);  $\delta_C$  (100 MHz, CDCl<sub>3</sub>) 14.9, 24.2, 55.5 (C-2), 68.6 (C-6), 69.5 (C-3), 70.4 (C-5), 81.9 (C-1), 82.1 (C-4), 101.9, 126.3, 128.4, 129.0, 129.4, 129.8, 134.2, 134.5; *m/z* (ES<sup>+</sup>) 464.12 ([M.Na]<sup>+</sup>, 100%), 905.27 ([2M.Na]<sup>+</sup>, 92%).

**Ethyl-3-*O*-benzyl-4,6-*O*-benzylidene-2-deoxy-2-*N*-phthalamido-1-thio-β-*D*-glucopyranoside<sup>[17]</sup>**

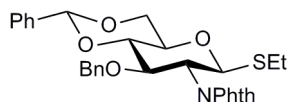

Sodium hydride (1.88 g of 60% w/w, 46.93 mmol) was added in portions to a solution of ethyl-4,6-*O*-benzylidene-2-deoxy-2-*N*-phthalamido-1-thio-β-*D*-glucopyranoside **30** (17.25 g, 39.11 mmol) in dry DMF (250 ml) at r.t. under an atmosphere of nitrogen. The mixture was stirred for 30 min then benzyl bromide (5.58 ml, 46.93 mmol) and tetra-*N*-butylammonium iodide (100 mg) were added. The reaction mixture was stirred for 3.5h whereupon TLC analysis (100% DCM) indicated the formation of a single product ( $R_f=0.09$ ). Methanol (2.5 ml) was added slowly. The mixture was stirred at r.t. for 15 min then concentrated *in vacuo*. The resulting residue was partitioned between DCM (300 ml) and water (300 ml). The layers were separated and the aqueous layer was extracted with DCM (2x 150 ml). The combined organic layers were washed with water (150 ml) brine (2x 150 ml), dried ( $MgSO_4$ ), filtered and concentrated *in vacuo* to give a yellow oil which was purified by flash column chromatography on silica gel eluting with 0-1% MeOH/DCM to give ethyl-3-*O*-benzyl-4,6-*O*-benzylidene-2-deoxy-2-*N*-phthalamido-1-thio-β-*D*-glucopyranoside **6** as a pale yellow solid (18.85g, 91%); m.p. 91-96 °C;  $[\alpha]_D^{25} +59.9$  ( $c=1.0$ ,  $CHCl_3$ ) [lit.  $[\alpha]_D^{20} +53.5$  ( $c=1.0$ ,  $CHCl_3$ )<sup>[17]</sup>];  $\delta_H$  (400 MHz,  $CDCl_3$ ) 1.17 (3H, t,  $J$  7.5, - $CH_3$ ), 2.63 (1H, dq,  $J$  12.5, 7.5, - $SCHH$ -), 2.70 (1H, dq,  $J$  12.5, 7.5, - $SCHH$ -), 3.72 (1H, td,  $J$  9.7, 4.8, 5-H), 3.84 (1H, t,  $J$  9.1, 4-H), 3.85 (1H, t,  $J$  10.2, 6- $HH$ ), 4.31 (1H, t,  $J$  10.3, 2-H), 4.43 (1H, dd,  $J$  10.4, 4.8, 6- $HH$ ), 4.47 (1H, dd,  $J$  9.7, 9.0, 3-H), 4.52 (1H, d, 12.3, Ph- $CHH$ -), 4.80 (1H, d, 12.3, Ph- $CHH$ -), 5.36 (1H, d,  $J$  10.8, 1-H), 5.64 (1H, s, Ph- $CH$ -), 6.86-6.96 (3H, m), 6.98-7.03 (2H, m), 7.36-7.45 (3H, m), 7.51-7.56 (2H, m), 7.62 (1H, d,  $J$  6.5), 7.68-7.76 (2H, m), 7.86 (1H, d,  $J$  6.5);  $\delta_C$  (100 MHz,  $CDCl_3$ ) 14.9 (- $CH_3$ ), 24.1 (- $SCH_2$ -), 54.7 (C-2), 68.7 (C-6), 70.4 (C-5), 74.2 (-Bn), 75.4 (C-3), 81.8 (C-1), 83.0 (C-4), 101.3, 126.1, 127.4, 127.8, 128.1, 128.12, 128.3, 129.0, 129.8, 134.0, 134.5, 137.3, 137.8;  $m/z$  ( $ES^+$ ) 532.19 ( $[M.H]^+$ , 5%), 549.22 ( $[M.NH_4]^+$  19%), 554.15 ( $[M.Na]^+$  100%).

**3-*O*-Benzyl-4,6-*O*-benzylidene-2-deoxy-2-*N*-phthalamido- $\beta$ -D-glucopyranosyl-1',1',1'-trichloroacetimidate<sup>[20]</sup>**

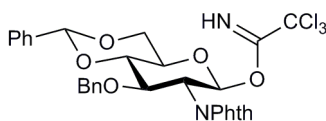

*N*-Bromosuccinimide (10.30 g, 57.85 mmol) was added to a solution of ethyl-3-*O*-benzyl-4,6-*O*-benzylidene-2-deoxy-2-*N*-phthalamido-1-thio- $\beta$ -D-glucopyranoside **6** (6.15 g, 11.57 mmol) in 10:1 acetone/water (75 ml) at -10 °C. The reaction mixture was stirred for 10 min whereupon TLC analysis (33% EtOAc/petrol) indicated complete consumption of the starting material ( $R_f=0.54$ ) and the formation of a single product ( $R_f=0.13$ ). The reaction mixture was diluted with DCM (300 ml) and washed with washed with saturated aqueous sodium hydrogencarbonate solution (100 ml), 10% aqueous sodium thiosulfate solution (2x 100 ml) and brine (100 ml), dried ( $MgSO_4$ ), filtered and concentrated *in vacuo*. The resulting white solid (6.21 g) was dissolved in dry DCM (75 ml) at r.t. under a nitrogen atmosphere and trichloroacetonitrile (11.60 ml, 115.70 mmol) and DBU (173  $\mu$ l, 1.16 mmol) were added. The reaction mixture was stirred at r.t. for 75 min whereupon TLC analysis (2% EtOAc/DCM) indicated the formation of a single product ( $R_f=0.27$ ). The mixture was concentrated *in vacuo* at 30 °C and purified immediately by flash column chromatography on silica gel eluting with an increasing proportion of EtOAc/DCM from 0-2% to give 3-*O*-benzyl-4,6-*O*-benzylidene-2-deoxy-2-*N*-phthalamido- $\beta$ -D-glucopyranosyl-1',1',1'-trichloroacetimidate **7** as a white solid (6.12 g, 84%):  $[\alpha]_D^{25} +87.1$  ( $c=1.0$ ,  $CHCl_3$ );  $\delta_H$  (400 MHz,  $CDCl_3$ ) 3.83-3.98 (3H, m, 3-*H*, 5-*H*, 6-*HH*), 4.46-4.61 (4H, m, 2-*H*, 4-*H*, 6-*HH*, PhCHH-), 4.83 (1H, d,  $J$  12.4, PhCHH-), 5.66 (1H, s, PhCH-), 6.50 (1H, d,  $J$  8.3, 1-*H*), 6.86-6.97 (3H, m, 3x Ar-*H*), 7.00-7.05 (2H, m, 2x Ar-*H*), 7.37-7.45 (3H, m, 3x Ar-*H*), 7.51-7.57 (2H, m, 2x Ar-*H*), 7.66-7.81 (4H, m, 4x Ar-*H*), 8.59 (1H, s, NH);  $\delta_C$  (400 MHz,  $CDCl_3$ ) 54.7 (C-2), 66.9 (C-3), 68.5 (C-6), 74.2 (- $CH_2$ Ph), 74.3 (C-4), 82.6 (C-5), 90.2 (- $CCl_3$ ), 94.3 (C-1), 101.5 (-CHPh), 123.4, 126.1, 127.5, 128.1, 128.3, 129.1, 131.4, 134.0, 137.1, 137.8, 160.8;  $m/z$  ( $ES^+$ ) 653.11 ( $[M.Na]^+$ , 81%), 654.11 ( $[M.Na]^+$ , 39%), 655.11 ( $[M.Na]^+$ , 100%), 656.11 ( $[M.Na]^+$ , 51%).

### Ethyl-3,6-di-*O*-benzyl-2-deoxy-2-*N*-phthalamido-1-thio- $\beta$ -D-glucopyranoside<sup>[21]</sup>

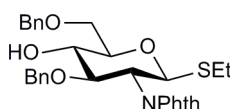

A solution of ethyl-3-*O*-benzyl-4,6-*O*-benzylidene-2-deoxy-2-*N*-phthalamido-1-thio- $\beta$ -D-glucopyranoside **6** (5.10g, 9.58 mmol) in dry THF (20 ml + 15 ml washings) was added *via* cannula to a suspension of sodium cyanoborohydride (6.02g, 95.80 mmol), methyl orange (~2mg) and freshly activated 3Å molecular sieves (3.0 g) in dry THF (85 ml) at 0°C under a nitrogen atmosphere. HCl (4M solution in dioxane) was added slowly (Caution: effervescence) until the yellow colour of the solution changed to a persistent pink (~20ml). The resulting reaction mixture was stirred 17h slowly warming to r.t. whereupon TLC analysis (33% EtOAc/petrol) indicated the complete consumption of the starting material ( $R_f=0.53$ ) and formation of a single product ( $R_f=0.32$ ). The reaction was quenched by the addition of saturated aqueous sodium hydrogencarbonate solution (200 ml). The resulting yellow solution was filtered through celite and diluted with DCM (200 ml). The layers were separated and the aqueous layer was extracted with DCM (2x 150 ml). The combined organic layers were washed with saturated aqueous sodium hydrogencarbonate solution (150 ml) and brine (150 ml), dried ( $MgSO_4$ ), filtered and concentrated *in vacuo* three times from MeOH to give white solid which was stirred with DCM (200 ml) and filtered through celite. The filtrate was concentrated *in vacuo* to give a pale yellow solid which was purified by flash column chromatography on silica gel eluting with an increasing proportion of EtOAc/DCM from 5-10% to give ethyl-3,6-di-*O*-benzyl-2-deoxy-2-*N*-phthalamido-1-thio- $\beta$ -D-glucopyranoside **8** as a white solid (4.18 g, 82%):  $[\alpha]_D^{25} +41.1$  ( $c=1.0$ ,  $CHCl_3$ ) [lit.  $[\alpha]_D^{25} +42$  ( $c=1.2$ ,  $CHCl_3$ )<sup>[21]</sup>];  $\delta_H$  (400 MHz,  $CDCl_3$ ) 1.17 (3H, t,  $J$  7.3, - $SCH_2CH_3$ ), 2.59 (1H, dq,  $J$  12.5, 7.3, - $SCHHCH_3$ ), 2.67 (1H, dq,  $J$  12.5, 7.3, - $SCHHCH_3$ ), 3.69 (1H, dt,  $J$  9.5, 5.2, 5-*H*), 3.78 (1H, dd,  $J$  10.1, 5.2, 6-*HH*), 3.81-3.88 (2H, m, 4-*H*, 6-*HH*), 4.20-4.31 (2H, m, 2-*H*, 3-*H*), 4.55 (1H, d,  $J$  12.1, PhCHH-), 4.59 (1H, d,  $J$  12.0, PhCHH-), 4.65 (1H, d,  $J$  12.0, PhCHH-), 4.76 (1H, d,  $J$  12.1, PhCHH-), 5.28 (1H, d,  $J$  9.9, 1-*H*), 6.92-7.84 (14H, m, 14x Ar-*H*);  $\delta_C$  (400 MHz,  $CDCl_3$ ) 14.9 (- $SCH_2CH_3$ ), 24.0 (- $SCH_2CH_3$ ), 54.4 (C-2), 70.9 (C-6), 73.8 (PhCH<sub>2</sub>-), 74.46 (PhCH<sub>2</sub>-), 74.48 (C-4), 77.6 (C-5), 79.5 (C-3), 81.1 (C-1), 123.3, 123.5, 127.4, 127.8, 127.9, 128.2, 128.5, 131.6, 133.8, 133.9, 137.6, 138.1, 167.5, 168.0;  $m/z$  ( $ES^-$ ) 532.21 ( $[M-H]^-$ , 100%).

**Ethyl-3-*O*-benzyl-4,6-*O*-benzylidene-2-deoxy-2-*N*-phthalamido- $\beta$ -D-glucopyranosyl-(1-4)-3,6-di-*O*-benzyl-2-deoxy-2-*N*-phthalamido-1-thio- $\beta$ -D-glucopyranoside**

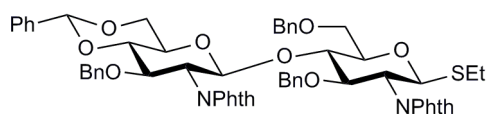

A mixture of 3-*O*-benzyl-4,6-*O*-benzylidene-2-deoxy-2-*N*-phthalamido- $\beta$ -D-glucopyranosyl-1',1',1'-trichloroacetimidate **7** (5.51 g, 8.72 mmol) and ethyl-3,6-di-*O*-benzyl-2-deoxy-2-*N*-phthalamido-1-thio- $\beta$ -D-glucopyranoside **8** (4.23 g, 7.93 mmol) was concentrated from toluene (4x 50 ml) and dried under vacuum. The dried mixture was dissolved in dry DCM (25 ml + 25 ml washings) and added *via* cannula to a flask containing freshly activated 4Å molecular sieves (3.1 g) at r.t. under a nitrogen atmosphere. The resulting suspension was stirred at r.t. for 30 min then cooled to -78 °C. Trimethylsilyltrifluoromethanesulfonate (143  $\mu$ l, 0.79 mmol) was added and the mixture was stirred at -78 °C for 5 min whereupon TLC analysis (10% EtOAc/toluene) indicated complete consumption of the donor **7** ( $R_f$ =0.42) and the acceptor **8** ( $R_f$ =12) and the formation of a major product ( $R_f$ =0.30). Triethylamine (2.5 ml) was added and the mixture was warmed to r.t. and filtered through celite. The filtrate was diluted with DCM (100 ml) and saturated aqueous sodium hydrogencarbonate solution (150 ml). The layers were separated and the aqueous layer was extracted with DCM (2x 100 ml). The combined organic layers were washed with saturated aqueous sodium hydrogencarbonate solution (100 ml), water (100 ml) and brine (100 ml), dried (MgSO<sub>4</sub>), filtered and concentrated *in vacuo* to give a pale yellow foam which was purified by flash column chromatography on silica gel eluting with an increasing proportion of EtOAc/toluene from 2-10% to give ethyl-3-*O*-benzyl-4,6-*O*-benzylidene-2-deoxy-2-*N*-phthalamido- $\beta$ -D-glucopyranosyl-(1-4)-3,6-di-*O*-benzyl-2-deoxy-2-*N*-phthalamido-1-thio- $\beta$ -D-glucopyranoside **9** (7.07 g, 89%) as a white solid: [ $\alpha$ ]<sub>D</sub><sup>25</sup> +29.8 (c=1.0, CHCl<sub>3</sub>) [lit. [ $\alpha$ ]<sub>D</sub><sup>25</sup> (c=1.0, CHCl<sub>3</sub>);  $\delta_H$  (400 MHz, CDCl<sub>3</sub>) 1.12 (3H, t, *J* 7.3, -SCH<sub>2</sub>CH<sub>3</sub>), 2.52 (1H, dq, *J* 12.6, 7.3, -SCHHCH<sub>3</sub>), 2.61 (1H, dq, *J* 12.6, 7.3, -SCHHCH<sub>3</sub>), 3.34-3.45 (3H, m, 5-*H*, 5-*H*, 6-*HH*), 3.50-3.59, (2H, m, 6-*HH*, 6-*HH*), 3.73 (1H, app t, *J* 8.9, 4-*H*), 4.18-4.28 (5H, m, 2-*H*, 2-*H*, 3-*H*, 4-*H*, 6-*HH*), 4.43 (1H, d, *J* 11.9, PhCHH-), 4.46 (1H, dd, *J* 9.9, 8.9, 3-

*H*), 4.49 (1H, d, *J* 11.9, PhCHH-), 4.50 (1H, d, *J* 12.3, PhCHH-), 4.53 (1H, d, *J* 12.3, PhCHH-), 4.81 (1H, d, *J* 12.3, PhCHH-), 4.85 (1H, d, *J* 12.3, PhCHH-), 5.11 (1H, d, *J* 9.1, 1a-*H*), 5.42 (1H, d, *J* 8.5, 1b-*H*), 5.53 (1H, s, PhCH-), 6.88-7.95 (28H, m, 28x Ar-*H*);  $\delta_c$  (400 MHz, CDCl<sub>3</sub>) 14.9 (-SCH<sub>2</sub>CH<sub>3</sub>), 23.6 (-SCH<sub>2</sub>CH<sub>3</sub>), 54.7 (C-2a), 56.6 (C-2b), 65.8 (C-5), 68.2 (C-6), 68.7 (C-6), 72.7 (PhCH<sub>2</sub>-), 74.1 (PhCH<sub>2</sub>-), 74.49 (PhCH<sub>2</sub>-), 74.51 (C-3), 76.1, 77.8, 78.8 (C-5), 80.8 (C-1a), 83.2 (-CCl<sub>3</sub>), 97.7 (C-1b), 101.2 (PhCH-), 123.2, 123.5, 126.1, 127.1, 127.3, 127.4, 127.5, 127.8, 127.98, 128.04, 128.26, 128.27, 129.00, 129.04, 131.6, 133.7, 133.8, 133.99, 134.03, 137.4, 137.9, 138.3, 138.5, 167.5, 167.9; *m/z* (ES<sup>+</sup>) 1025.41 ([M.Na]<sup>+</sup> 100%); ESI<sup>+</sup> [C<sub>58</sub>H<sub>54</sub>N<sub>2</sub>NaO<sub>12</sub>S] requires 1025.3290, found 1025.3279.



**Phenyl-3-*O*-benzyl-4,6-*O*-benzylidene-2-deoxy-2-*N*-phthalamido- $\beta$ -D-glucopyranosyl-(1-4)-3,6-di-*O*-benzyl-2-deoxy-2-*N*-phthalamido- $\beta$ -D-glucopyranoside**

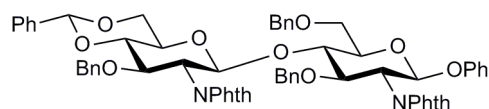

Ethyl-3-*O*-benzyl-4,6-*O*-benzylidene-2-deoxy-2-*N*-phthalamido- $\beta$ -D-glucopyranosyl-(1-4)-3,6-di-*O*-benzyl-2-deoxy-2-*N*-phthalamido-1-thio- $\beta$ -D-glucopyranoside **9** (1.50 g, 1.50 mmol) was concentrated *in vacuo* from toluene (3x 25 ml) then dissolved in dry DCM (20 ml) and stirred over freshly activated 4Å molecular sieves (0.5 g) at r.t. under a nitrogen atmosphere for 1h. The mixture was cooled to 0 °C and NIS (422 mg, 1.88 mmol, dried by stirring over freshly activated 4Å molecular sieves) was added followed immediately by TMS-OTf (27  $\mu$ L, 0.15 mmol). The mixture was stirred at 0 °C for 15 min then phenol (212 mg, 2.25 mmol, concentrated *in vacuo* from toluene (3x 10 ml) and stirred over freshly activated 4Å molecular sieves) in dry DCM (10 ml) was added. The reaction mixture was stirred for 4 h in the dark, slowly warming to rt °C then filtered through celite and diluted with DCM (100 ml) and 5% aqueous sodium thiosulfate solution (100 ml). The layers were separated and the aqueous phase was extracted with DCM (3x 80 ml). The combined organic extracts were washed with 5% aqueous sodium thiosulfate solution (100 ml) and brine (100 ml), dried (MgSO<sub>4</sub>), filtered and concentrated *in vacuo* to give a yellow oil which was purified by flash column chromatography (Biotage SNAP 100g) on silica gel eluting with an increasing proportion of EtOAc/petrol from 25-70% to give phenyl-3-*O*-benzyl-4,6-*O*-benzylidene-2-deoxy-2-*N*-phthalamido- $\beta$ -D-glucopyranosyl-(1-4)-3,6-di-*O*-benzyl-2-deoxy-2-*N*-phthalamido- $\beta$ -D-glucopyranoside **10** (570 mg, 37%) as a white solid:  $[\alpha]_D^{21} +27.7$  (c, 0.65 in CHCl<sub>3</sub>);  $^1\text{H NMR}$  (500 MHz, CDCl<sub>3</sub>) 3.38-3.53 (4H, m, H5a, H5b, H6a, H6'a), 3.57 (1H, at, *J* 10.1 Hz, H6b), 3.75 (1H, at, *J* 9.2 Hz, H4b), 4.21-4.31 (4H, m, H2b, H3a, H4a, H6'b), 4.37-4.47 (4H m, H2a, H3b, 2 x PhCH), 4.50, 4.80 (2H, ABq, *J* 12.3 Hz, PhCH<sub>2</sub>), 4.54, 4.85 (2H, ABq, *J* 12.3 Hz, PhCH<sub>2</sub>), 5.40 (1H, d, *J*<sub>1,2</sub> 8.2 Hz, H1b), 5.54 (1H, s, PhCH), 5.61 (1H, d, *J*<sub>1,2</sub> 8.5 Hz, H1a), 6.77-7.92 (33H, m, ArH);  $^{13}\text{C NMR}$  (125 MHz, CDCl<sub>3</sub>) 55.5 (d, C2a), 56.5 (d, C2b), 65.8 (d, C5), 67.8 (t, C6), 68.7 (t, C6a), 72.7 (t, PhCH<sub>2</sub>), 74.1 (t, PhCH<sub>2</sub>), 74.4 (d, C5), 74.5 (t,

PhCH<sub>2</sub>), 74.6 (d, C3b), 76.7, 77.0 (2 x d, C3a, C4a), 83.1 (d, C4b), 96.2 (d, C1a), 97.8 (d, C1b), 101.2 (d, PhCH), 116.9, 122.6, 123.3, 126.1, 127.1, 127.3, 127.4, 127.5, 127.8, 128.0, 128.2, 128.3, 129.0, 129.2 (14 x d, 33 x ArH), 139.3, 137.8, 137.9, 138.1, 138.4, 156.7 (6 x s, 9 x ArC). *m/z* (ES<sup>+</sup>) 1093 (100%, M+NH<sub>4</sub>/MeCN).

**Phenyl-3-*O*-benzyl-4,6-*O*-benzylidene-2-deoxy-2-*N*-acetyl- $\beta$ -D-glucopyranosyl-(1-4)-3,6-di-*O*-benzyl-2-deoxy-2-*N*-acetyl- $\beta$ -D-glucopyranoside**

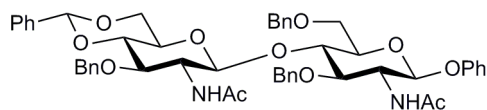

Phenyl-3-*O*-benzyl-4,6-*O*-benzylidene-2-deoxy-2-*N*-phthalamido- $\beta$ -D-glucopyranosyl-(1-4)-3,6-di-*O*-benzyl-2-deoxy-2-*N*-phthalamido- $\beta$ -D-glucopyranoside **10** (1.0 g, 0.97 mmol) was dissolved in methanol (50 mL), and 1,2-ethylenediamine (10 mL) was added and the reaction was heated to 80 °C. After 16 h, t.l.c. (ethyl acetate) showed the formation of a product ( $R_f$  0) with complete consumption of the starting material ( $R_f$  0.7). The reaction was co-evaporated with toluene (3 x 50 mL). The resulting residue was taken up in acetic anhydride (30 mL) and pyridine (50 mL). After 16 h, t.l.c. (ethyl acetate) showed the formation of a product ( $R_f$  0.5) with complete consumption of the starting material ( $R_f$  0). The reaction was partitioned between ethyl acetate (50 mL) and water (100 mL) and the phases separated. The aqueous phase was re-extracted with ethyl acetate (2 x 50 mL). The combined organic layers were washed with dilute hydrochloric acid (300 mL, 1M aqueous solution), sodium hydrogen carbonate (50 mL of a saturated aqueous solution), brine (50 mL), dried ( $MgSO_4$ ), filtered and concentrated *in vacuo*. The resulting residue was precipitated from acetone/petrol to afford phenyl 3-*O*-benzyl-4,6-*O*-benzylidene-2-deoxy-2-*N*-acetyl- $\beta$ -D-glucopyranosyl-(1-4)-3,6-di-*O*-benzyl-2-deoxy-2-*N*-acetyl- $\beta$ -D-glucopyranoside **31** (550 mg, 66%) as a white amorphous solid;  $[\alpha]_D^{19}$  -9.2 (c, 0.5 in 1:1 MeOH/ $CHCl_3$ );  $J_{max}$  (KBr) 3275 (bs, NH), 1655, 1549 (s, C=O)  $cm^{-1}$ ;  $^1H$  (500 MHz,  $CDCl_3$ ) 1.77, 1.90 (6H, 2 x s, 2 x NHAc), 3.20 (1H, dat,  $J_{5,6}$  4.7 Hz,  $J$  9.4 Hz, H5b), 3.49-3.74 (7H, m, H3a, H3b, H4b, H5a, H6a, H6b, H6'b), 3.82 (1H, at,  $J$  9.2 Hz, H2b), 3.88 (1H, at,  $J$  5.2 Hz, H4a), 4.13 (1H, dd,  $J_{5,6}$  4.9 Hz,  $J_{6,6'}$  10.6 Hz, H6a), 4.24-4.27 (2H, m, H2a, PhCH), 4.344.39 (2H, m, H1b, PhCH), 4.56, 4.77 (2H, ABq,  $J$  12.0 Hz,  $PhCH_2$ ), 4.62, 4.68 (2H, ABq,  $J$  11.6 Hz,  $PhCH_2$ ), 5.10 (1H, d,  $J_{1,2}$  5.4 Hz, H1a), 5.46 (1H, s, PhCH), 6.87-7.41 (25H, m, ArH);  $^{13}C$  (125 MHz,  $CDCl_3$ ) 23.9, 24.2 (2 x q, 2 x NHAc), 52.1 (d, C-2a), 56.4 (d, C2b), 67.1 (d, C5b), 69.7 (t, C6a), 70.7 (t, C6b), 73.9, 74.9, 75.3 (3 x t, 3 x  $PhCH_2$ ), 75.5 (d, C4a), 75.8, 78.8 (2 x d, C3a, C3b), 78.7, 83.3 (2 x d, C4b, C5a), 99.4 (d, C1a), 101.8

(d, C1b), 102.4 (d, PhCH), 117.6, 123.5, 127.2, 128.8, 129.0, 129.2, 129.3, 129.5, 129.6, 129.7, 130.3, 130.6 (12 x d, 25 x ArC), 138.3, 138.8, 139.4, 139.6, 158.3 (5 x s, 5 x ArC), 172.6, 173.1 (2 x s, 2 x CO).  $m/z$  (ES<sup>+</sup>) 917 (100%, M+NH<sub>4</sub>/MeCN). HRMS found 881.3627. calcd 881.3620 for C<sub>50</sub>H<sub>54</sub>N<sub>2</sub>NaO<sub>11</sub>.

**Phenyl-3,4,6-tri-*O*-acetyl-2-deoxy-2-*N*-acetyl- $\beta$ -D-glucopyranosyl-(1-4)-3,6-di-*O*-acetyl-2-deoxy-2-*N*-acetyl- $\beta$ -D-glucopyranoside**

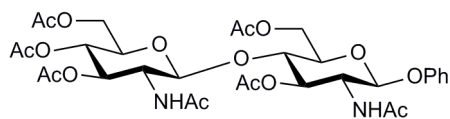

Phenyl 3-*O*-benzyl-4,6-*O*-benzylidene-2-deoxy-2-*N*-acetyl- $\beta$ -D-glucopyranosyl-(1-4)-3,6-di-*O*-benzyl-2-deoxy-2-*N*-acetyl- $\beta$ -D-glucopyranoside **31** (500 mg, 100  $\mu$ mol) and Pearlman's catalyst ( $\text{Pd}(\text{OH})_2$ , moist, 400 mg) were suspended in absolute methanol (20 mL). The resulting solution was degassed and purged with hydrogen gas, then left to stir under an atmosphere of hydrogen. After a 24 h period, t.l.c. (ethyl acetate) indicated the formation of a major product ( $R_f$  0.0) with complete consumption of the starting material ( $R_f$  0.9). The solution was filtered through celite<sup>®</sup> and concentrated *in vacuo*. The resulting residue resuspended in acetic anhydride (10 mL) and pyridine (15 mL) and stirred at RT. After 18 h t.l.c. (petrol:ethyl acetate, 2:3) indicated the formation of a product ( $R_f$  0.4) with complete consumption of the starting material ( $R_f$  0). The reaction was diluted with water (20 mL) and partitioned with ethyl acetate (20 mL) and the phases separated. The aqueous layer was reextracted with ethyl acetate (2 x 20 mL). The combined organic layers were washed with dilute hydrochloric acid (500 mL, 1M), sodium hydrogen carbonate (50 mL of a saturated aqueous solution), brine (30 mL), dried ( $\text{MgSO}_4$ ), filtered and concentrated *in vacuo* to afford phenyl 3,4,6-tri-*O*-acetyl-2-deoxy-2-*N*-acetyl- $\beta$ -D-glucopyranosyl-(1-4)-3,6-di-*O*-acetyl-2-deoxy-2-*N*-acetyl- $\beta$ -D-glucopyranoside **32** (380 mg, 92%) as a white amorphous foam;  $[\alpha]_D^{21}$  -31.3 (c, 0.45 in  $\text{CHCl}_3$ );  $J_{\text{max}}$  (KBr) 3272 (bs, NH), 1748, 1660, 1560 (s, C=O)  $\text{cm}^{-1}$ ;  $^1\text{H}$  (500 MHz,  $\text{CDCl}_3$ ) 1.93, 1.99, 2.01, 2.09 (21H, 4 x s, 7 x OAc), 3.75 (1H, at,  $J$  9.5 Hz, H2b), 3.78-3.80 (1H, m, H5b), 3.83-3.89 (2H, m, H4a, H5a), 4.05 (1H, bd,  $J_{6,6'}$  12.3 Hz, H6b), 4.12-4.17 (2H, m, H2a, H6a), 4.44 (1H, dd,  $J_{5,5'}$  4.0 Hz,  $J_{6,6'}$  12.4 Hz, H6'b), 4.50 (1H, d,  $J_{6,6'}$  11.7 Hz, H6'a), 4.76 (1H, d,  $J_{1,2}$  8.5 Hz, H1b), 5.00 (1H, at,  $J$  9.6 Hz, H4b), 5.14 (1H, d,  $J_{1,2}$  8.2 Hz, H1a), 5.23 (1H, at,  $J$  9.0 Hz, H3a), 5.30 (1H, at,  $J$  10.0 Hz, H3b), 6.98 (2H, d,  $J$  8.2 Hz, ArH), 7.03 (1H, t,  $J$  7.4 Hz, ArH), 7.27 (2H, t,  $J$  7.4 Hz, ArH);  $^{13}\text{C}$  (125 MHz,  $\text{CDCl}_3$ ) 21.1, 21.2, 21.3, 21.4, 23.2, 23.3 (6 x q, 7 x OAc), 55.4 (d, C2a), 56.2 (d, C2b), 63.1 (t,

C6b), 63.9 (t, C6a), 69.8 (d, C4b), 72.9 (d, C5b), 73.7 (d, C3b), 74.1 (d, C5a), 74.6 (d, C3a), 77.7 (d, C4a), 100.0 (d, C1a), 102.1 (d, C1b), 117.9, 124.1, 130.6 (3 x d, 5 x ArC), 158.6 (s, ArC), 171.4, 172.0, 172.4, 172.5, 173.6 (5 x s, 7 x CO). *m/z* (ES<sup>+</sup>) 733 (100%, M+Na). HRMS found 733.2432. calcd 733.2436 for C<sub>32</sub>H<sub>42</sub>N<sub>2</sub>NaO<sub>16</sub>.

## Phenyl-2-deoxy-2-*N*-acetyl- $\beta$ -D-glucopyranosyl-(1-4)-2-deoxy-2-*N*-acetyl- $\beta$ -D-glucopyranoside

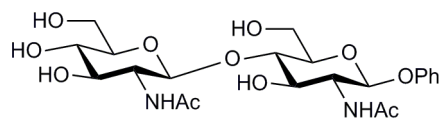

Phenyl-3,4,6-tri-*O*-acetyl-2-deoxy-2-*N*-acetyl- $\beta$ -D-glucopyranosyl-(1-4)-3,6-di-*O*-acetyl-2-deoxy-2-*N*-acetyl- $\beta$ -D-glucopyranoside **32** (380 mg, 0.53 mmol) and sodium methoxide (3 mg, 0.53 mmol) were added to a stirred solution of methanol (20 mL). After 1 h, t.l.c. (ethyl acetate/petrol, 1:1) indicated the formation of a product ( $R_f$  0) with complete consumption of the starting material ( $R_f$  0.5). The reaction was neutralised by the addition of Dowex-50 ion exchange resin<sup>®</sup> after which point the reaction was filtered and concentrated *in vacuo* to afford phenyl 2-deoxy-2-*N*-acetyl- $\beta$ -D-glucopyranosyl-(1-4)-2-deoxy-2-*N*-acetyl- $\beta$ -D-glucopyranoside **1** (250 mg, 94%) as a white amorphous solid;  $[\alpha]_D^{21}$  -6.0 (c, 0.25 in H<sub>2</sub>O);  $J_{\max}$  (KBr) 3384 (bs, NH, OH), 1746, 1657, 1558 (s, C=O) cm<sup>-1</sup>;  $^1\text{H NMR}$  (500 MHz, CDCl<sub>3</sub>) 1.99, 1.99 (6H, 2 x s, 2 x NHAc), 3.26-3.43 (3H, m, H3b, H4b, H5a), 3.57-3.74 (6H, m, H2a, H2b, H3a, H4a, H6a, H6b), 3.79 (1H, d,  $J$  10.7 Hz, H6'a), 3.84 (1H, d,  $J$  12.3 Hz, H6'b), 3.93 (1H, dd,  $J_{1,2}$  8.9 Hz,  $J_{2,3}$  9.9 Hz, H2a), 4.53 (1H, d,  $J_{1,2}$  8.2 Hz, H1b), 5.07 (1H, d,  $J_{1,2}$  8.5 Hz, H1a), 6.96 (2H, d,  $J$  8.5 Hz, ArH), 7.06 (1H, t,  $J$  7.4 Hz, ArH), 7.30 (2H, t,  $J$  8.1 Hz, ArH);  $^{13}\text{C NMR}$  (125 MHz, CDCl<sub>3</sub>) 21.9, 22.0 (2 x q, 2 x NHAc), 54.9 (d, C2a), 55.5 (d, C2b), 59.9 (t, C6a), 60.5 (t, C6b), 69.7, 73.4 (2 x d, C3b, C4b), 72.2, 74.6, 79.1 (3 x d, C2a, C3a, C4a), 75.9 (d, C5b), 99.3 (d, C1a), 101.4 (d, C1b), 116.5, 123.3, 129.8 (3 x d, 5 x ArC), 156.6 (s, ArC), 174.4, 174.5 (2 x s, 2 x CO).  $m/z$  (ES<sup>-</sup>) 499 (100%, MH<sup>+</sup>). HRMS found 499.1932. calcd 499.1933 for C<sub>22</sub>H<sub>31</sub>N<sub>2</sub>O<sub>11</sub>.

## Synthesis of compound 2.

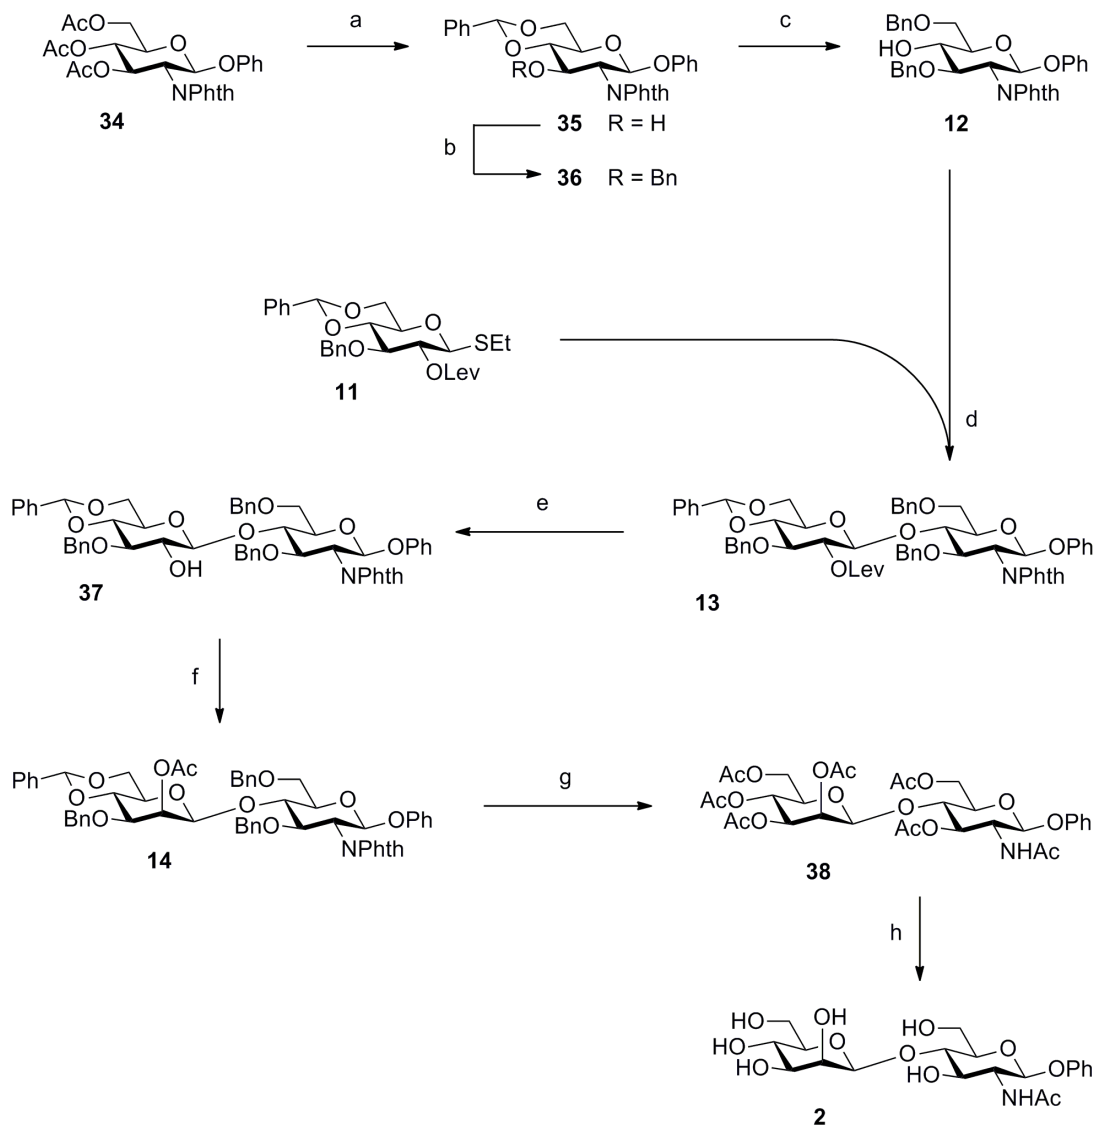

*Reagents and conditions:* a) i- NaOMe, MeOH, rt, ii- benzaldehyde dimethylacetal, TsOH.H<sub>2</sub>O, MeCN, rt, 87%; b) NaH, BnBr, TBAI, DMF, rt, 75%; c) NaCNBH<sub>3</sub>, THF, 0 °C, 81%; d) NIS, TMS-OTf, 4Å MS, DCM, 0 °C, 88%; e) H<sub>2</sub>NNH<sub>2</sub>.AcOH, MeOH, rt, 95%; f) i- Tf<sub>2</sub>O, DCM, pyridine, ii- Bu<sub>4</sub>N.OAc, toluene, )), 84%; g) i- H<sub>2</sub>, Pd(OH)<sub>2</sub>, EtOH, ii- 1,2-ethylenediamine, BuOH,  $\Delta$ , iii- Ac<sub>2</sub>O, pyridine, 74%; h) NaOMe, MeOH, 94%.



### Phenyl-4,6-*O*-benzylidene-2-deoxy-2-*N*-phthalamido- $\beta$ -D-glucopyranoside

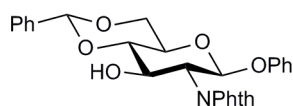

Phenyl-3,4,6-tri-*O*-acetyl-2-deoxy-2-*N*-phthalamido- $\beta$ -D-glucopyranoside<sup>[15]</sup> (15.8 g, 31.1 mmol) and sodium methoxide (170 mg, 3.1 mmol) were added to a stirred solution of methanol (100 mL). After 30 min, t.l.c. (ethyl acetate) indicated the formation of a product ( $R_f$  0) with complete consumption of the starting material ( $R_f$  0.7). The reaction was concentrated *in vacuo*. The resulting residue was dissolved in anhydrous dimethylformamide (100 mL) and benzaldehyde dimethyl acetal (8.9 mL, 5.92 mmol) and camphor sulfonic acid (1.49 g, 5.92 mmol) were added. The resulting solution was heated to 60 °C at a reduced pressure of 240 mbar. After 4 h, t.l.c. (petrol:ethyl acetate, 1:1) showed the formation of a product ( $R_f$  0.5) with complete consumption of the starting material ( $R_f$  0). The reaction was cooled to RT and quenched by the addition of sodium hydrogen carbonate (400 mL of a saturated aqueous solution). The solution was partitioned between DCM (200 mL) and the phases separated. The aqueous phase was re-extracted with DCM (2 x 100 mL). The combined organic layers were washed with brine (2 x 200 mL), dried (MgSO<sub>4</sub>), filtered and concentrated *in vacuo*. The resulting residue was purified by flash column chromatography (ethyl acetate/petrol) to afford phenyl-4,6-*O*-benzylidene-2-deoxy-2-*N*-phthalamido- $\beta$ -D-glucopyranoside **35** (10.0 g, 68%) as a white amorphous foam; [ $\alpha$ ]<sub>D</sub><sup>22</sup> +11.5 (c, 0.65 in CHCl<sub>3</sub>);  $J_{\max}$  (KBr) 3476 (s, OH), 1777, 1714 (s, NCO) cm<sup>-1</sup>;  $\tau_{\text{H}}$  (360 MHz, CDCl<sub>3</sub>) 2.64 (1H, d,  $J$  3.6 Hz, OH3), 3.55 (1H, at,  $J$  9.0 Hz, H4), 3.60 (1H, dat,  $J_{5,6}$  4.9 Hz,  $J$  9.0 Hz, H5), 3.71 (1H, at,  $J$  9.8 Hz, H6), 4.26 (1H, dd,  $J_{5,6}$  4.4 Hz,  $J_{6,6'}$  10.3 Hz, H6'), 4.39 (1H, dd,  $J_{1,2}$  8.4 Hz,  $J_{2,3}$  10.4 Hz, H2), 4.57 (1H, ddd,  $J_{2,3}$  10.4 Hz,  $J_{3,4}$  8.6 Hz,  $J$  3.6 Hz, H3), 5.45 (1H, s, PhCH), 5.77 (1H, d,  $J_{1,2}$  8.4 Hz, H1), 6.76-7.70 (14H, m, ArH);  $\tau_{\text{C}}$  (90 MHz, CDCl<sub>3</sub>) 56.8 (d, C2), 66.7 (d, C5), 68.9, 69.0 (d, t, C3, C6), 82.4 (d, C4), 97.3 (d, C1), 102.4 (d, PhCH), 117.3, 125.5, 126.8, 128.8, 129.8, 129.9, 131.9 (7 x d, 14 x ArC), 134.6, 137.3, 156.9 (3 x s, 4 x ArC), 168.6, 171.6 (2 x s, 2 x CO);  $m/z$  (ES<sup>+</sup>) 964 (M<sub>2</sub>NH<sub>4</sub><sup>+</sup>, 100%). HRMS (ES<sup>+</sup>) Calcd. for C<sub>27</sub>H<sub>23</sub>NO<sub>7</sub>Na (MNa<sup>+</sup>) 496.1367. Found 496.1377.

**Phenyl-3-*O*-benzyl-4,6-*O*-benzylidene-2-deoxy-2-*N*-phthalamido-β-D-glucopyranoside**

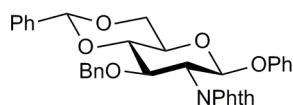

Phenyl-4,6-*O*-benzylidene-2-deoxy-2-*N*-phthalamido-β-D-glucopyranoside **35** (8.3 g, 16.0 mmol) was suspended in anhydrous dimethylformamide (150 mL) to which benzyl bromide (2.9 mL, 24 mmol) was added. The mixture was cooled to 0 °C and sodium hydride (60% in mineral oil, 950 mg, 2.4 mmol) was added portionwise. After 18 h, t.l.c. (petrol:ethyl acetate, 1:1) showed the formation of a major product ( $R_f$  0.8). The reaction was quenched by the careful addition of methanol (*ca* 50 mL). The mixture was partitioned between diethyl ether (100 mL) and water (100 mL) and the phases separated. The aqueous phase was re-extracted with diethyl ether (2 x 50 mL). The combined organic layers were washed with brine (2 x 250 mL), dried ( $MgSO_4$ ), filtered and concentrated *in vacuo*. The resulting residue was purified by flash column chromatography (petrol:ethyl acetate, 7:3) and recrystallised from ethylacetate/petrol to afford phenyl-3-*O*-benzyl-4,6-*O*-benzylidene-2-deoxy-2-*N*-phthalamido-β-D-glucopyranoside **36** (6.8 g, 75%) as a white foam; m.p. 129130 °C; [ $\alpha$ ] $_D^{22}$  +153.8 (c, 0.65 in  $CHCl_3$ );  $J_{max}$  (KBr) 1777, 1715 (s, NCO)  $cm^{-1}$ ;  $\tau_{MH}$  (360 MHz,  $CDCl_3$ ) 3.85 (1H, dat,  $J_{5,6'}$  4.5 Hz,  $J$  9.7 Hz, H5), 3.92-4.01 (2H, m, H4, H6), 4.49 (1H, dd,  $J_{5,6'}$  4.9 Hz,  $J_{6,6'}$  10.3 Hz, H6'), 4.58-4.63 (3H, m, H2, H3, PhCH $\underline{H}$ ), 4.90 (1H, d,  $J$  12.5 Hz, PhCH $\underline{H}$ ), 5.72 (1H, s, PhCH), 5.93-5.95 (1H, m, H1), 6.93-7.75 (19H, m, ArH);  $\tau_{MC}$  (90 MHz,  $CDCl_3$ ) 56.1 (d, C2), 66.7 (d, C5), 69.2 (t, C6), 74.6 (t, PhCH $_2$ ), 83.3 (d, C4), 97.3 (d, C1), 101.8 (d, PhCH), 117.3, 123.5, 123.9, 126.5, 127.4, 127.9, 128.1, 128.5, 128.8, 129.0, 131.9 (13 x d, 19 x ArC), 134.4, 137.7, 138.2, 156.9 (4 x s, 5 x ArC), 168.1, 171.6 (2 x s, 2 x CO);  $m/z$  ( $ES^+$ ) 581 ( $MNH_4^+$ , 100%). HRMS ( $ES^+$ ) Calcd. for  $C_{34}H_{29}NO_7Na$  ( $MNa^+$ ) 586.1836. Found 586.1821.

### Phenyl-3,6-di-*O*-benzyl-2-deoxy-2-*N*-phthalamido- $\beta$ -D-glucopyranoside

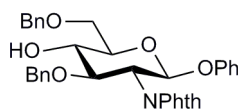

Phenyl-3-*O*-benzyl-4,6-*O*-benzylidene-2-deoxy-2-*N*-phthalamido- $\beta$ -D-glucopyranoside **36** (17.2 g, 29.6 mmol) was dissolved in anhydrous THF (400 mL) and the resulting solution was cooled to 0 °C, to which methyl orange (speck) and sodium cyanoborohydride (37 g, 593 mmol) was added. The resulting solution was acidified by the slow addition of hydrochloric acid in dioxane (4M, ~200 mL to keep the indicator intensely pink). The resulting mixture was stirred under argon at RT. After a 12 h period, t.l.c. (petrol:ethyl acetate, 2:1) indicated the formation of a product ( $R_f$  0.3) with complete consumption of the starting material ( $R_f$  0.4). The reaction was diluted with ice water (1L) and filtered through celite. The filtrate was extracted with DCM (3 x 300 mL) and the combined organics were stirred in aqueous hydrochloric acid (2M, 400 mL) overnight. The organic layer was then washed with sodium hydrogen carbonate (600 mL, of a saturated aqueous solution), dried ( $MgSO_4$ ) and concentrated *in vacuo*. The resulting residue was purified by flash column chromatography (petrol:ethyl acetate, 2:1) to afford phenyl-3,6-di-*O*-benzyl-2-deoxy-2-*N*-phthalamido- $\beta$ -D-glucopyranoside **12** (13.5 g, 81%) as a white amorphous solid;  $[\alpha]_D^{22} +115.1$  (c, 1.4 in  $CHCl_3$ );  $J_{max}$  (KBr) 3474 (bs, OH), 1776, 1713 (s, NCO)  $cm^{-1}$ ;  $^1H$  (360 MHz,  $CDCl_3$ ) 3.10 (1H, bs, OH), 3.81-3.89 (3H, m, H5, H6, H6'), 3.96 (1H, at,  $J$  8.8 Hz, H4), 4.39 (1H, dd,  $J_{2,3}$  10.7 Hz,  $J_{3,4}$  8.3 Hz, H3), 4.50 (1H, dd,  $J_{1,2}$  8.4 Hz,  $J_{2,3}$  10.5 Hz, H2), 4.60-4.70 (3H, m, 3 x PhCH), 4.83 (1H, d,  $J$  12.3 Hz, PhCH), 5.84 (1H, d,  $J_{1,2}$  8.2 Hz, H1), 6.91-7.72 (19H, m, ArH);  $^{13}C$  (90 MHz,  $CDCl_3$ ) 55.6 (d, C2), 67.5 (t, C6), 74.2, 74.3 (2 x t, 2 x PhCH<sub>2</sub>), 74.6, 74.9 (2 x d, C4, C5), 79.0 (d, C3), 96.8 (d, C1), 117.0, 117.4, 123.2, 123.9, 127.9, 128.3, 128.4, 128.6, 128.9, 129.8, 129.9, 131.9 (12 x d, 19 x ArC), 138.0, 138.4, 157.1 (3 x s, 5 x ArC);  $m/z$  ( $ES^+$ ) 583 ( $MNH_4^+$ , 70%), 1148 ( $M_2NH_4^+$ , 100%). HRMS ( $ES^+$ ) Calcd. for  $C_{34}H_{31}NO_7Na$  ( $MNa^+$ ) 588.1993. Found 588.1993.

**Phenyl-3-*O*-benzyl-4-*O*-benzylidene-2-*O*-levulinoyl-β-D-glucopyranosyl-(1-4)-3,6-di-*O*-benzyl-2-deoxy-2-*N*-phthalamido-β-D-glucopyranoside**

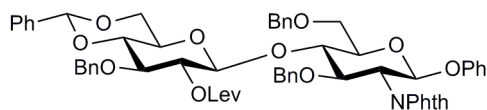

Phenyl-3,6-di-*O*-benzyl-2-deoxy-2-*N*-phthalamido-β-D-glucopyranoside **12** (100 mg, 0.17 mmol), ethyl 3-*O*-benzyl-4,6-*O*-benzylidene-2-*O*-levulinoyl-1-thio-β-D-glucopyranoside<sup>[14]</sup> **11** (93 mg, 0.19 mmol) and *N*-iodosuccinimide (76 mg, 0.34 mmol) were dissolved in anhydrous DCM (20 mL) and stirred over 4Å MS for 1 h. The reaction was cooled to 0°C and trimethylsilyl trifluoromethanesulfonate (3 μL, 0.017) was added. After a 2.5 h period, t.l.c. (petrol:ethyl acetate, 2:1) indicated the formation of a product ( $R_f$  0.3) with complete consumption of the starting material ( $R_f$  0.4). The reaction was filtered through celite and washed with aqueous sodium thiosulfate (30 mL, 10% w/v), brine (30 mL), dried (MgSO<sub>4</sub>), filtered and concentrated *in vacuo*. The resulting residue was purified by flash column chromatography (petrol:ethyl acetate, 1:1) to afford phenyl 3-*O*-benzyl-4-*O*-benzylidene-2-*O*-levulinoyl-β-D-glucopyranosyl-(1-4)-3,6-di-*O*-benzyl-2-deoxy-2-*N*-phthalamido-β-D-glucopyranoside **13** (225 mg, 88%) as a white amorphous solid;  $[\alpha]_D^{21} +28.0$  (c, 1.25 in CHCl<sub>3</sub>);  $J_{\max}$  (KBr) 1776, 1777, 1751, 1716, 1591 (s, CO) cm<sup>-1</sup>;  $^1\text{H NMR}$  (500 MHz, CDCl<sub>3</sub>) 2.11 (3H, s, CH<sub>3</sub>), 2.27-2.45 (2H, m, CH<sub>2</sub>Lev), 2.54-2.76 (2H, m, CH<sub>2</sub>Lev), 3.13 (1H, dat,  $J_{5,6'}$  4.9 Hz,  $J$  9.8 Hz, H5b), 3.38 (1H, at,  $J$  10.2 Hz, H6b), 3.47 (1H, at,  $J$  9.3 Hz, H3b), 3.55 (1H, at,  $J$  9.2 Hz, H4b), 3.63-3.66 (1H, m, H5a), 3.70-3.73 (1H, m, H6a), 3.80 (1H, dd,  $J_{5,6'}$  3.2 Hz,  $J_{6,6'}$  11.7 Hz, H6'a), 4.04-4.08 (1H, m, H4a), 4.18 (1H, dd,  $J_{5,6'}$  4.9 Hz,  $J_{6,6'}$  10.5 Hz, H6'b), 4.23 (1H, dd,  $J_{2,3}$  8.6 Hz, dd,  $J_{3,4}$  9.9 Hz, H3a), 4.31-4.37 (3H, m, H2a, 2 x PhCH), 4.49 (1H, d,  $J_{1,2}$  7.9 Hz, H1b), 4.57, 4.76 (2H, ABq,  $J$  12.2 Hz, PhCH<sub>2</sub>), 4.68 (1H, d,  $J$  12.0 Hz, PhCH), 4.70 (1H, d,  $J$  12.2 Hz, PhCH), 4.89 (1H, at,  $J$  8.5 Hz, H2b), 5.38 (1H, s, PhCH), 5.65 (1H, d,  $J_{1,2}$  8.4 Hz, H1a), 6.78-7.55 (29H, m, ArH);  $^{13}\text{C NMR}$  (125 MHz, CDCl<sub>3</sub>) 28.2 (t, CH<sub>2</sub>), 30.4 (q, CH<sub>3</sub>), 38.7 (t, CH<sub>2</sub>), 55.9 (d, C2a), 66.3 (d, C5b), 67.9 (t, C6a), 69.0 (t, C6b), 70.0 (t, PhCH<sub>2</sub>), 74.5 (d, C2b), 75.1, 75.4 (2 x t, 2 x PhCH<sub>2</sub>), 77.0 (d, C5a), 77.1 (d, C3a), 78.2 (d, C4a), 78.9 (d, C3b), 82.1 (d, C4b), 96.7 (d, C1a), 101.1 (d, PhCH), 117.4, 123.1, 123.8, 126.5, 127.5, 128.1, 128.2, 128.3, 128.4, 128.6, 128.9, 129.5, 129.7, 131.9, 134.2 (15 x d, 29 x ArC), 137.6, 138.3, 138.7, 138.9, 157.2 (5 x s, 7 x ArC), 171.7 (s, CO), 206.7 (s, CO);  $m/z$  (ES<sup>+</sup>) 1026 (MNa<sup>+</sup>, 100%).

**Phenyl-3-*O*-benzyl-4-*O*-benzylidene-β-D-glucopyranosyl-(1-4)-3,6-di-*O*-benzyl-2-deoxy-2-*N*-phthalamido-β-D-glucopyranoside**

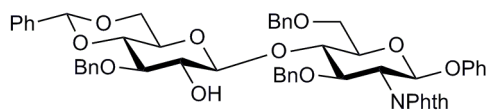

Phenyl 3-*O*-benzyl-4-*O*-benzylidene-2-*O*-levulinoyl-β-D-glucopyranosyl-(1-4)-3,6-di-*O*-benzyl-2-deoxy-2-*N*-phthalamido-β-D-glucopyranoside **13** (1.2 g, 1.19 mmol) and hydrazine acetate (490 mg, 5.38 mmol) were dissolved in methanol (100 mL). After 16 h the reaction was partitioned between water (100 mL) and DCM (100 mL) and the phases separated. The aqueous phase was re-extracted with DCM (2 x 100 mL). The combined organic layers were washed with brine (100 mL), dried (MgSO<sub>4</sub>), filtered and concentrated *in vacuo*. The resulting residue was purified by flash column chromatography (petrol:ethyl acetate, 1:1) to afford phenyl-3-*O*-benzyl-4-*O*-benzylidene-β-D-glucopyranosyl-(1-4)-3,6-di-*O*-benzyl-2-deoxy-2-*N*-phthalamido-β-D-glucopyranoside **37** (1.8 g, 95%) as a white foam; [ $\alpha$ ]<sub>D</sub><sup>21</sup> +28.0 (c, 1.25 in CHCl<sub>3</sub>);  $J_{\max}$  (KBr) 1776, 1777, 1751, 1716, 1591 (s, CO) cm<sup>-1</sup>;  $^1\text{H NMR}$  (360 MHz, CDCl<sub>3</sub>) 2.94 (1H, d,  $J$  1.8 Hz, OH), 3.15 (1H, dat,  $J_{5,6}$  5.0 Hz,  $J$  10.7 Hz, H5b), 3.43-3.56 (4H, m, H2b, H3b, H4b, H6a), 3.68-3.72 (1H, m, H5a), 3.78 (1H, dd,  $J_{5,6}$  1.8 Hz,  $J_{6,6'}$  11.4 Hz, H6a), 3.96 (1H, dd,  $J_{5,6'}$  3.6 Hz,  $J_{6,6'}$  11.4 Hz, H6'a), 4.09-4.15 (2H, m, H4a, H6'b), 4.36-4.39 (3H, m, H2a, H3a, PhCH), 4.56, 4.63 (2H, ABq,  $J$  12.0 Hz, PhCH<sub>2</sub>), 4.57 (1H, m, H1b), 4.70-4.83 (2H, ABq,  $J$  11.8 Hz, PhCH<sub>2</sub>), 7.73 (1H, d,  $J$  12.5 Hz, PhCH<sub>2</sub>), 5.41 (1H, s, PhCH), 5.65 (1H, m, H1a), 6.78-7.57 (29H, m, ArH);  $^{13}\text{C NMR}$  (90 MHz, CDCl<sub>3</sub>) 56.1 (d, C2a), 66.7 (d, C5b), 68.4 (t, C6a), 69.1 (t, C6b), 73.9, 75.0, 75.2 (3 x t, PhCH<sub>2</sub>), 75.4 (d, C5a), 75.4, 80.8, 81.8 (3 x d, C2b, C3b, C4b), 78.2 (d, C4a), 79.2 (d, C3a), 96.9 (d, C1a), 101.6 (d, PhCH), 103.8 (d, C1b), 123.3, 123.8, 126.4, 127.6, 127.9, 128.3, 128.4, 128.5, 128.6, 128.8, 128.9, 129.4, 129.8, 134.3 (14 x d, 29 x ArC), 137.7, 138.2, 138.8, 157.2 (4 x s, 7 x ArC), 168.2 (s, CO);  $m/z$  (ES<sup>+</sup>) 1026 (MNa<sup>+</sup>, 100%).

**Phenyl-2-*O*-acetyl-3-*O*-benzyl-4-*O*-benzylidene- $\beta$ -D-mannopyranosyl-(1-4)-3,6-di-*O*-benzyl-2-deoxy-2-*N*-phthalamido- $\beta$ -D-glucopyranoside**

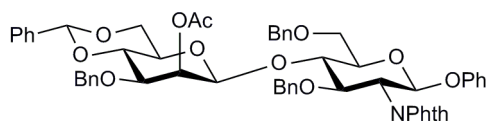

Phenyl-3-*O*-benzyl-4-*O*-benzylidene- $\beta$ -D-glucopyranosyl-(1-4)-3,6-di-*O*-benzyl-2-deoxy-2-*N*-phthalamido- $\beta$ -D-glucopyranoside **37** (106 mg, 0.14 mmol) and anhydrous pyridine (325  $\mu$ L, 1.71 mmol) were dissolved in anhydrous DCM (4 mL). The reaction was cooled to 0  $^{\circ}$ C and trifluoromethanesulfonic anhydride (285  $\mu$ L, 1.71 mmol) was added. The reaction was allowed to warm to RT over a 2 h period, at which point the reaction was partitioned between DCM (10 mL) and sodium hydrogen carbonate (20 mL) and the phases separated. The organic phase was dried (MgSO<sub>4</sub>), filtered and concentrated *in vacuo*. The resulting orange residue was dried under vacuum for 2 h, at which point it was taken up into anhydrous toluene (10 mL) and tetrabutylammonium acetate (250 mg, 0.84 mmol) was added. The reaction was placed under sonication for 16 h then concentrated *in vacuo*. The resulting residue was purified by flash column chromatography (petrol:ethyl acetate, 2:1) to afford phenyl-2-*O*-acetyl-3-*O*-benzyl-4-*O*-benzylidene- $\beta$ -D-mannopyranosyl-(1-4)-3,6-di-*O*-benzyl-2-deoxy-2-*N*-phthalamido- $\beta$ -D-glucopyranoside **14** (94 mg, 84%) as a white foam; [ $\alpha$ ]<sub>D</sub><sup>21</sup> +28.0 (c, 1.25 in CHCl<sub>3</sub>); J<sub>max</sub> (KBr) 1776, 1777, 1751, 1716, 1591 (s, CO) cm<sup>-1</sup>; <sup>1</sup>H NMR (360 MHz, CDCl<sub>3</sub>) 2.02 (3H, s, OAc), 3.00 (1H, dat, *J* 9.6 Hz, *J*<sub>5,6'</sub> 5.0 Hz, H5b), 3.31 (1H, dd, *J*<sub>2,3</sub> 3.5 Hz, *J*<sub>3,4</sub> 9.9 Hz, H3b), 3.43 (1H, at, *J* 9.5 Hz, H6b), 3.55-3.58 (1H, m, H5a), 3.62 (1H, dd, *J*<sub>5,6</sub> 1.7 Hz, *J*<sub>6,6'</sub> 11.2 Hz, H6a), 3.69 (H, dd, *J*<sub>5,6'</sub> 3.1 Hz, *J*<sub>6,6'</sub> 11.2 Hz, H6'a), 3.72 (1H, at, *J* 9.5 Hz, H4b), 4.02-4.08 (2H, m, H4a, H6b), 4.19 (1H, dd, *J*<sub>2,3</sub> 10.6 Hz, *J*<sub>3,4</sub> 8.4 Hz, H3a), 4.26-4.31 (3H, m, H2a, 2 x PhCH), 4.40 (1H, d, *J* 12.5 Hz, PhCH), 4.49-4.53 (2H, m, H1b, PhCH), 4.59 (1H, d, *J* 12.0 Hz, PhCH), 4.71 (1H, d, *J* 12.3 Hz, PhCH), 5.31 (1H, bd, *J* 2.7 Hz, H2b), 5.36 (1H, s, PhCH), 5.58 (1H, d, *J* 8.4 Hz, H1a), 6.69-7.51 (29H, m, ArH); <sup>13</sup>C NMR (90 MHz, CDCl<sub>3</sub>) 21.5 (q, OAc), 55.9 (d, C2a), 67.4 (d, C5b), 68.6 (t, C6a), 69.6 (d, C2b), 72.1, 73.9 (2 x t, 2 x PhCH<sub>2</sub>), 75.0 (d, C5a), 75.1 (t, PhCH<sub>2</sub>), 76.2 (d, C3b), 77.3 (d, C3a), 78.3 (d, C4b), 79.3 (d, C4a), 96.9 (d, C1a), 99.9 (d, C1b), 101.9 (d, PhCH), 117.4, 123.2, 123.8, 126.5, 127.7, 128.0, 128.2, 128.4, 128.6, 128.8, 129.0, 129.4, 129.8, 134.2 (14 x d, 29 x ArC), 137.8, 138.1, 138.2, 138.9, 157.2 (5 x s, 7 x ArC), 170.7 (s, CO); *m/z* (ES<sup>+</sup>) 1026 (MNa<sup>+</sup>, 100%).

**Phenyl-2,3,4,6-tetra-*O*-acetyl- $\beta$ -D-mannopyranosyl-(1-4)-3,6-di-*O*-acetyl-2-deoxy-2-*N*-acetamido- $\beta$ -D-glucopyranoside**

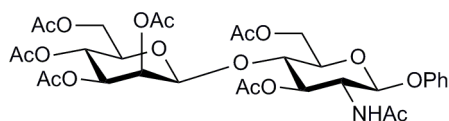

Phenyl-2-*O*-acetyl-3-*O*-benzyl-4-*O*-benzylidene- $\beta$ -D-mannopyranosyl-(1-4)-3,6-di-*O*-benzyl-2-deoxy-2-*N*-phthalamido- $\beta$ -D-glucopyranoside **14** (950 mg, 1.18 mmol) and Pearlman's catalyst ( $\text{Pd}(\text{OH})_2$ , moist, 800 mg) were suspended in absolute ethanol (10 mL). The resulting solution was degassed and purged with hydrogen gas, then left to stir under an atmosphere of hydrogen. After a 48 h period, the solution was filtered through celite<sup>®</sup> and concentrated *in vacuo*. The resulting residue was dissolved in 1-butanol (5 mL) and 1,2-ethylenediamine (4 mL) and the reaction was heated to 80 °C. After 16 h the reaction was co-evaporated with toluene (3 x 50 mL). The resulting residue was taken up in acetic anhydride (10 mL) and pyridine (15 mL). After 16 h, t.l.c. the reaction was quenched by the addition of water (50 mL). The reaction was partitioned with ethyl acetate (30 mL) and the phases separated. The aqueous phase was re-extracted with ethyl acetate (2 x 20 mL). The combined organic layers were washed with dilute hydrochloric acid (300 mL of a 1M aqueous solution), sodium hydrogen carbonate (50 mL of a saturated aqueous solution), brine (50 mL), dried ( $\text{MgSO}_4$ ), filtered and concentrated *in vacuo*. The resulting residue was purified by flash column chromatography (ethyl acetate) to afford phenyl-2,3,4,6-tetra-*O*-acetyl- $\beta$ -D-mannopyranosyl-(1-4)-3,6-di-*O*-acetyl-2-deoxy-2-*N*-acetamido- $\beta$ -D-glucopyranoside **38** (623 mg, 74%) as a white amorphous solid;  $[\alpha]_{\text{D}}^{21} +28.0$  (c, 1.25 in  $\text{CHCl}_3$ );  $J_{\text{max}}$  (KBr) 1776, 1777, 1751, 1716, 1591 (s, CO)  $\text{cm}^{-1}$ ;  $^1\text{H NMR}$  (500 MHz,  $\text{CDCl}_3$ ) 1.92, 1.96, 2.02, 2.05, 2.07, 2.10, 2.13 (21H, 7 x s, 7 x  $\text{COCH}_3$ ), 3.63-3.66 (1H, m, H5b), 3.76-3.79 (1H, m, H5a), 3.90 (1H, at,  $J$  8.9 Hz, H4a), 4.07-4.10 (1H, m, H6b), 4.19-4.25 (2H, m, H2a, H6a), 4.30-4.37 (2H, m, H6'a, H6'b), 4.72 (1H, s, H1b), 5.03 (1H, dd,  $J_{2,3}$  3.1 Hz,  $J_{3,4}$  9.8 Hz, H3b), 5.08 (1H, d,  $J_{1,2}$  7.9 Hz, H1a), 5.16-5.24 (2H, m, H3a, H4a), 5.40 (1H, d,  $J_{2,3}$  3.2 Hz, H2b), 5.94 (1H, d,  $J$  9.2 Hz, NHa), 6.94-7.27 (5H, m, ArH);  $^{13}\text{C NMR}$  (125 MHz,  $\text{CDCl}_3$ ) 20.6, 20.7, 20.8, 20.9, 23.2 (5 x q, 7 x  $\text{COCH}_3$ ), 53.7 (d, C2a), 62.3 (t, C6a), 62.7 (t, C6b), 65.8 (d, C3a), 68.5 (d, C2b), 76.7 (d, C3b), 71.8 (d, C4b), 72.5, 72.6 (2 x d, C5a, C5b), 74.7 (d, C4a), 97.6 (d,

C1b), 99.1 (d, C1a), 116.0, 123.1, 129.6 (3 x d, 5 x ArC), 157.1 (s, ArC), 169.6, 170.0, 170.4, 170.5, 170.6, 170.8 (6 x s, CO);  $m/z$  (ES<sup>+</sup>) 770 (MNH<sub>4</sub>MeCN<sup>+</sup>, 100%).  
HRMS (ES<sup>+</sup>) Calcd. for C<sub>32</sub>H<sub>41</sub>NO<sub>17</sub>Na (MNa<sup>+</sup>) 734.2272 Found 734.2272.



## Phenyl- $\beta$ -D-mannopyranosyl-(1-4)-2-deoxy-2-*N*-acetyl- $\beta$ -D-glucopyranoside

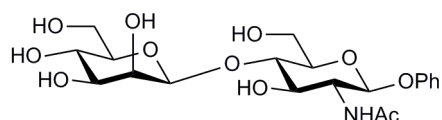

Phenyl-2,3,4,6-tetra-*O*-acetyl- $\beta$ -D-mannopyranosyl-(1-4)-3,6-di-*O*-acetyl-2-deoxy-2-*N*-acetamido- $\beta$ -D-glucopyranoside **38** (420 mg, 0.59 mmol) and sodium methoxide (4 mg, 0.07 mmol) were added to a stirred solution of methanol (10 mL). After 1 h, t.l.c. (ethyl acetate, 1:1) indicated the formation of a product ( $R_f$  0). The reaction was neutralised by the addition of Dowex-50 ion exchange resin<sup>®</sup> after which point the reaction was filtered and concentrated *in vacuo* to afford phenyl- $\beta$ -D-mannopyranosyl-(1-4)-2-deoxy-2-*N*-acetyl- $\beta$ -D-glucopyranoside **2** (268 mg, 99%) as a white amorphous solid;  $[\alpha]_D^{21}$  -6.0 (c, 0.25 in H<sub>2</sub>O);  $J_{\max}$  (KBr) 3289 (bs, NH, OH), 1656, 1551 (s, C=O) cm<sup>-1</sup>;  $^1\text{H}$  (500 MHz, D<sub>2</sub>O) 1.94 (3H, s, NHAc), 3.35 (1H, ddd,  $J_{4,5}$  9.1 Hz,  $J_{5,6}$  2.3 Hz,  $J_{6,6'}$  6.7 Hz, H5b), 3.50 (1H, at,  $J$  9.8 Hz, H4b), 3.57 (1H, dd,  $J_{2,3}$  3.1 Hz,  $J_{3,4}$  9.8 Hz, H3b), 3.64-3.67 (2H, m, H6b, H2/3/4a), 3.70 (1H, dd,  $J_{5,6}$  4.6 Hz,  $J_{6,6'}$  12.6 Hz, H6a), 3.75-3.79 (2H, m, H2/3/4a), 3.84 (1H, dd,  $J_{5,6'}$  1.8 Hz,  $J_{6,6'}$  12.7 Hz, H6'a), 3.86 (1H, dd,  $J_{5,6'}$  2.2 Hz,  $J_{6,6'}$  12.2 Hz, H6'b), 3.94 (1H, at,  $J$  9.3 Hz, H2a), 4.00 (1H, d,  $J_{2,3}$  3.1 Hz, H2b), 4.72 (1H, bs, H1b), 5.09 (1H, d,  $J_{1,2}$  8.5 Hz, H1a), 7.00 (2H, d,  $J$  7.8 Hz, ArH), 7.06 (1H, dd,  $J$  7.3 Hz, ArH), 7.30 (2H, t,  $J$  7.8 Hz, ArH);  $^{13}\text{C}$  (125 MHz, D<sub>2</sub>O) 22.1 (q, COCH<sub>3</sub>), 54.9 (d, C2), 60.0 (t, C6b), 60.9 (t, C6a), 66.6 (d, C4b), 70.5 (d, C2b), 72.0, 74.7, 78.6 (3 x d, C3a, C4a, C5a), 72.7 (d, C3b), 76.4 (d, C5b), 99.5 (d, C1b), 100.1 (d, C1a), 116.6, 123.5, 129.9 (3 x d, 5 x ArC), 156.7 (s, ArC), 174.8 (s, CO).  $m/z$  (ES<sup>-</sup>) 458 (100%, MH<sup>+</sup>). HRMS found 458.1668. calcd 458.1662 for C<sub>20</sub>H<sub>28</sub>NO<sub>11</sub>.

### Synthesis of compound 3.

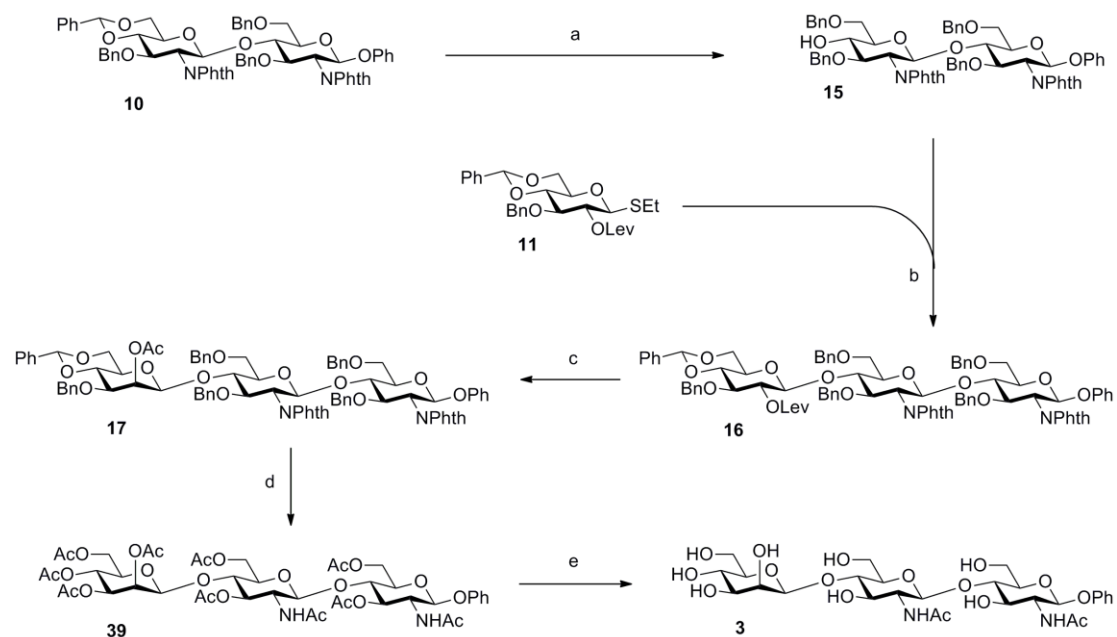

*Reagents and conditions:* a)  $\text{NaBH}_3\text{CN}$ ,  $\text{HCl}/\text{dioxane}$ ,  $\text{THF}$ ,  $0^\circ\text{C}$ -rt, 80%; b)  $\text{MeOTf}$ ,  $\text{DCM}$ ,  $4 \text{ \AA}$  MS, 75%; c) i -  $\text{H}_2\text{NNH}_2 \cdot \text{HOAc}$ ,  $\text{MeOH}$ ,  $55^\circ\text{C}$ ; ii -  $\text{Tf}_2\text{O}$ ,  $\text{DCM}$ , pyridine; iii -  $\text{Bu}_4\text{N} \cdot \text{OAc}$ , toluene,  $\text{N}_2$ , 68%; d) i-  $\text{H}_2$ ,  $\text{Pd}(\text{OH})_2$ ,  $\text{EtOH}$ , ii- 1,2-ethylenediamine,  $\text{BuOH}$ ,  $\Delta$ , iii-  $\text{Ac}_2\text{O}$ , pyridine, 94%; e)  $\text{NaOMe}$ ,  $\text{MeOH}$ , 86%.

**Phenyl-3,6-di-*O*-benzyl-2-deoxy-2-*N*-phthalamido- $\beta$ -D-glucopyranosyl-(1-4)-3,6-di-*O*-benzyl-2-deoxy-2-*N*-phthalamido- $\beta$ -D-glucopyranoside**

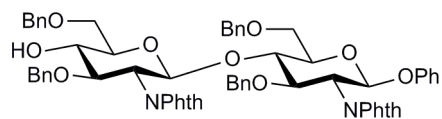

Phenyl-3-*O*-benzyl-4,6-*O*-benzylidene-2-deoxy-2-*N*-phthalamido- $\beta$ -D-glucopyranosyl-(1-4)-3,6-di-*O*-benzyl-2-deoxy-2-*N*-phthalamido- $\beta$ -D-glucopyranoside **10** (3.6 g, 4.85 mmol) was dissolved in anhydrous THF (100 mL) and the resulting solution was cooled to 0 °C, to which methyl orange (speck) and sodium cyanoborohydride (4.4 g, 69.6 mmol) was added. The resulting solution was acidified by the slow addition of hydrochloric acid in dioxane (4M, ~100 mL to keep the indicator intensely pink). The resulting mixture was stirred under argon at RT. After a 12 h period, t.l.c. (petrol:ethyl acetate, 1:1) indicated the formation of a product ( $R_f$  0.4) with complete consumption of the starting material ( $R_f$  0.6). The reaction was diluted with ice water (1L) and filtered through celite. The filtrate was extracted with DCM (3 x 200 mL) and the combined organics were stirred in aqueous hydrochloric acid (2M, 500 mL) overnight. The organic layer was then washed with sodium hydrogen carbonate (600 mL, of a saturated aqueous solution), dried ( $MgSO_4$ ) and concentrated *in vacuo*. The resulting residue was purified by flash column chromatography (petrol:ethyl acetate, 1:1) to afford phenyl 3,6-di-*O*-benzyl-2-deoxy-2-*N*-phthalamido- $\beta$ -D-glucopyranosyl-(1-4)-3,6-di-*O*-benzyl-2-deoxy-2-*N*-phthalamido- $\beta$ -D-glucopyranoside **15** (2.88 g, 80%) as a white amorphous foam; m.p. 113-115 °C;  $[\alpha]_D^{22} +25.3$  (c, 2.2 in  $CHCl_3$ );  $^1H$  (500 MHz,  $CDCl_3$ ) 3.19 (1H, bs, OH), 3.42-3.50 (3H, m, H5a, H5b, H6b), 3.573.62 (2H, m, H6a, H6'b), 3.74 (1H, dd,  $J_{5,6}$  4.3 Hz,  $J_{6,6'}$  9.8 Hz, H6'a), 3.85 (1H, at,  $J$  8.8 Hz, H4b), 4.19 (1H, dd,  $J_{1,2}$  8.2 Hz,  $J_{2,3}$  10.7 Hz, H2b), 4.23-4.30 (3H, m, H3a, H3b, H4a), 4.40 (1H, dd,  $J_{1,2}$  8.7 Hz,  $J_{2,3}$  10.6 Hz, H2a), 4.44 (1H, d,  $J$  11.6 Hz, PhCH), 4.50-4.56 (5H, m, 5 x PhCH), 4.80-4.85 (2H, m, 2 x PhCH), 5.34 (1H, d,  $J_{1,2}$  8.2 Hz, H1b), 5.60 (1H, d,  $J_{1,2}$  8.5 Hz, H1a), 6.78-7.91 (33H, m, ArH);  $^{13}C$  (125 MHz,  $CDCl_3$ ) 55.5 (d, C2a), 56.1 (d, C2b), 67.1 (t, C6b), 68.1 (t, C6a), 70.8, 72.7 (2 x t, 2 x  $PhCH_2$ ), 73.0 (d, C5b), 73.7 (t,  $PhCH_2$ ), 74.4 (t,  $PhCH_2$ ), 74.7 (d, C5a), 75.2 (d, C4b), 75.7, 76.5, 78.3 (3 x d, C3a, C3b, C4a), 96.2

(d, C1a), 97.1 (d, C1b), 116.9, 122.6, 123.2, 123.3, 123.7, 127.0, 127.3, 127.4, 127.7, 127.8, 127.9, 128.0, 128.1, 128.2, 128.5, 128.6, 129.2, 131.5, 131.8, 133.7, 133.9, 134.1 (22 x d, 33 x ArC), 137.5, 138.2, 138.3, 138.4 (4 x s, 8 x ArC), 156.7 (s, ArC), 167.6, 168.4 (2 x s, 4 x CO). *m/z* (ES<sup>+</sup>) 1059 (100%, M+Na<sup>+</sup>).

**Phenyl-2-*O*-levulinoyl-3-*O*-benzyl-4,6-benzylidene- $\beta$ -D-mannopyranosyl-(1-4)-3,6-di-*O*-benzyl-2-deoxy-2-*N*-phthalamido- $\beta$ -D-glucopyranosyl-(1-4)-3,6-di-*O*-benzyl-2-deoxy-2-*N*-phthalamido- $\beta$ -D-glucopyranoside**

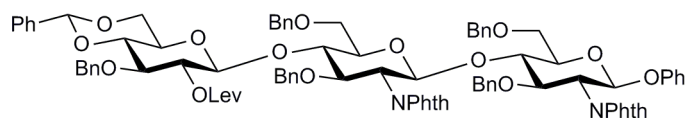

Ethyl 3-*O*-benzyl-4,6-*O*-benzylidene-2-*O*-levulinyl-1-thio- $\beta$ -D-glucopyranoside<sup>[14]</sup> **11** (370 mg, 0.96 mmol) in anhydrous DCM (20 mL) and phenyl 3,6-di-*O*-benzyl-2-deoxy-2-*N*-phthalamido- $\beta$ -D-glucopyranosyl-(1-4)-3,6-di-*O*-benzyl-2-deoxy-2-*N*-phthalamido- $\beta$ -D-glucopyranoside **15** (713 mg, 0.96 mmol) in DCM (20 mL) were added to a dried flask containing activated 4Å molecular sieves (*ca* 500 mg) *via* cannula. The resulting solution was stirred for 1 h, after which point methyl trifluoromethanesulfonate (215  $\mu$ L, 1.89 mmol) was added. After a 20 h period, t.l.c. (toluene:ethyl acetate, 3:1) indicated the formation of a major product ( $R_f$  0.6) with complete consumption of the starting material ( $R_f$  0.5). The reaction was quenched with sodium hydrogen carbonate (30 mL of a saturated aqueous solution) and the solution was concentrated *in vacuo*. The resulting residue was purified by flash column chromatography (toluene:ethyl acetate, 3:1) to afford phenyl-2-*O*-levulinoyl-3-*O*-benzyl-4,6-benzylidene- $\beta$ -D-mannopyranosyl-(1-4)-3,6-di-*O*-benzyl-2-deoxy-2-*N*-phthalamido- $\beta$ -D-glucopyranosyl-(1-4)-3,6-di-*O*-benzyl-2-deoxy-2-*N*-phthalamido- $\beta$ -D-glucopyranoside **16** (769 mg, 75%) as a white amorphous foam;  $[\alpha]_D^{20}$  +24.0 (c, 0.65 in  $\text{CHCl}_3$ );  $J_{\text{max}}$  (KBr) 1778, 1747, 1712 (s, C=O)  $\text{cm}^{-1}$ ;  $^1\text{H NMR}$  (500 MHz,  $\text{CDCl}_3$ ) 2.18, 2.38 (2 x 3H, 2 x s, 2 x  $\text{COCH}_3$ ), 2.44-2.49 (2H, m,  $\text{CH}_2\text{Lev}$ ), 2.72-2.75 (2H, m,  $\text{CH}_2\text{Lev}$ ), 3.22 (1H, dat,  $J_{5,6}$  5.0 Hz,  $J$  9.8 Hz, H5c), 3.42-3.46 (2H, m, H6b, H6c), 3.47-3.51 (2H, m, H5a, H5b), 3.55-3.57 (1H, m, H6'b), 3.60 (1H, at,  $J$  8.9 Hz, H3c), 3.65 (1H, at,  $J$  9.2 Hz, H4c), 3.75-3.81 (2H, m, H6a, H6'a), 4.15 (1H, dd,  $J_{3,4}$  8.5 Hz,  $J_{4,5}$  9.8 Hz, H4a/b), 4.22-4.34 (5H, m, H2b, H3a, H3b, H4a/b, H6'c), 4.39-4.45 (3H, m, H2a, 2 x PhCH), 4.48 (1H, d,  $J$  11.9 Hz, PhCH), 4.52 (1H, d,  $J$  12.0 Hz, PhCH), 4.56 (1H, d,  $J$  12.9 Hz, PhCH), 4.64 (1H, d,  $J_{1,2}$  7.9 Hz, H1c), 4.67 (1H, d,  $J$  12.0 Hz, PhCH), 4.70, 4.87 (2H, ABq,  $J$  12.0 Hz,  $\text{PhCH}_2$ ), 4.81 (1H, d,  $J$  12.3 Hz, PhCH), 4.94 (1H, d,  $J$  12.5 Hz, PhCH), 5.01 (1H, at,  $J$  8.5 Hz, H2c), 5.32 (1H, d,  $J_{1,2}$  8.5 Hz, H1b), 5.47 (1H, s, PhCH), 5.59 (1H, d,  $J_{1,2}$  8.5 Hz, H1a), 6.77-7.69 (43H, m, ArH);  $^{13}\text{C NMR}$

(125 MHz, CDCl<sub>3</sub>) 21.5 (q, COCH<sub>3</sub>), 27.8 (t, CH<sub>2</sub>), 29.8 (q, COCH<sub>3</sub>), 37.8 (t, CH<sub>2</sub>), 55.5 (d, C2a), 56.5 (d, C2b), 65.9 (d, C5c), 67.2 (t, C6a), 68.0 (t, C6b), 68.6 (t, C6c), 72.7, 73.8 (2 x t, 2 x PhCH<sub>2</sub>), 73.3 (d, C2a), 73.6, 74.1 (2 x t, 3 x PhCH<sub>2</sub>), 74.7 (2 x d, C5a, C5b), 76.1, 76.7, 76.9, 77.9 (4 x d, C3a, C3c, C4a, C4b), 78.6 (d, C3c), 81.7 (d, C4c), 96.3 (d, C1a), 97.2 (d, C1b), 100.7 (d, C1c), 101.2 (d, PhCH), 116.7, 126.0, 126.9, 127.0, 127.2, 127.3, 127.6, 127.8, 127.9, 128.1, 128.2, 128.6, 129.0, 129.2 (14 x d, 43 x ArC), 138.0, 138.2, 138.6, 138.7, 156.8 (5 x s, 11 x ArC), 167.6, 168.4, 171.3 (3 x s, 5 x CO), 205.9 (s, CO). *m/z* (ES<sup>+</sup>) 1533 (100%, M+NH<sub>4</sub>/MeCN<sup>+</sup>).

**Phenyl-2-*O*-acetyl-3-*O*-benzyl-4,6-benzylidene- $\beta$ -D-mannopyranosyl-(1-4)-3,6-di-*O*-benzyl-2-deoxy-2-*N*-phthalamido- $\beta$ -D-glucopyranosyl-(1-4)-3,6-di-*O*-benzyl-2-deoxy-2-*N*-phthalamido- $\beta$ -D-glucopyranoside**

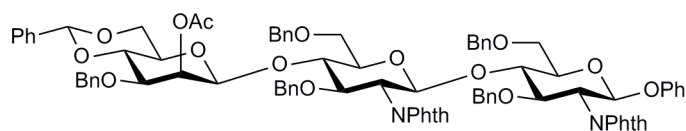

Phenyl-2-*O*-levulinoyl-3-*O*-benzyl-4,6-benzylidene- $\beta$ -D-mannopyranosyl-(1-4)-3,6-di-*O*-benzyl-2-deoxy-2-*N*-phthalamido- $\beta$ -D-glucopyranosyl-(1-4)-3,6-di-*O*-benzyl-2-deoxy-2-*N*-phthalamido- $\beta$ -D-glucopyranoside **16** (700 mg, 0.66 mmol) and hydrazine acetate (180 mg, 1.93 mmol) were dissolved in methanol (50 mL) and heated to 55 °C. After 16 h the reaction was partitioned between water (100 mL) and DCM (100 mL) and the phases separated. The aqueous phase was re-extracted with DCM (2 x 100 mL). The combined organic layers were washed with brine (100 mL), dried (MgSO<sub>4</sub>), filtered and concentrated *in vacuo*. The resulting residue was purified by flash column chromatography (petrol:ethyl acetate, 1:1). The purified intermediate and anhydrous pyridine (1.0 mL, 12.2 mmol) were dissolved in anhydrous DCM (15 mL). The reaction was cooled to 0 °C and trifluoromethanesulfonic anhydride (860  $\mu$ L, 5.17 mmol) was added. The reaction was allowed to warm to RT over a 2 h period, at which point the reaction was partitioned between DCM (20 mL) and sodium hydrogen carbonate (20 mL) and the phases separated. The organic phase was dried (MgSO<sub>4</sub>), filtered and concentrated *in vacuo*. The resulting orange residue was dried under vacuum for 2 h, at which point it was taken up into anhydrous toluene (20 mL) and tetrabutylammonium acetate (800 mg, 2.16 mmol) was added. The reaction was placed under sonication for 16 h then concentrated *in vacuo*. The resulting residue was purified by flash column chromatography (petrol:ethyl acetate, 1:1) to afford phenyl-2-*O*-acetyl-3-*O*-benzyl-4,6-benzylidene- $\beta$ -D-mannopyranosyl-(1-4)-3,6-di-*O*-benzyl-2-deoxy-2-*N*-phthalamido- $\beta$ -D-glucopyranosyl-(1-4)-3,6-di-*O*-benzyl-2-deoxy-2-*N*-phthalamido- $\beta$ -D-glucopyranoside **17** (506 mg, 68%) as a white amorphous foam;  $[\alpha]_D^{22} +17.3$  (c, 0.45 in CHCl<sub>3</sub>);  $J_{\max}$  (KBr) 1778, 1747, 1714 (s, C=O) cm<sup>-1</sup>;  $^1\text{H NMR}$  (500 MHz, CDCl<sub>3</sub>) 2.34 (3H, s, OAc), 3.18 (1H, dat,  $J$  5.1 Hz,  $J$

9.8 Hz, H5c), 3.32 (1H, bd,  $J$  9.8 Hz, H5b), 3.48-3.54 (3H, m, H3c, H5a, H6a), 3.57-3.63 (2H, m, H6c, H6'a), 3.69 (1H, dd,  $J_{5,6}$  2.2 Hz,  $J_{6,6'}$  11.3 Hz, H6b), 3.74 (1H, bd,  $J$  11.3 Hz, H6'b), 3.92 (1H, at,  $J$  9.8 Hz, H4c), 4.18-4.23 (2H, m, H4b, H6'c), 4.25-4.36 (4H, m, H2b, H3a, H3b, H4b), 4.44-4.73 (9H, m, H2a, 9 x PhCH), 4.75 (1H, bd, H1c), 4.92 (1H, d,  $J$  11.9 Hz, PhCH), 4.94 (1H, d,  $J$  12.7 Hz, PhCH), 5.33 (1H, d,  $J_{1,2}$  8.2 Hz, H1b), 5.53 (1H, d,  $J_{2,3}$  3.1 Hz, H2c), 5.55 (1H, s, PhCH), 5.63 (1H, d,  $J_{1,2}$  8.5 Hz, H1a), 6.81-7.76 (43H, m, ArH);  $^{13}\text{C}$  (125 MHz,  $\text{CDCl}_3$ ) 21.1 (q, OAc), 55.6 (d, C2a), 56.6 (d, C2b), 66.9 (d, C5c), 67.8 (t, C6b), 68.1 (t, C6c), 68.5 (t, C6a), 69.1 (d, C2c), 71.6, 72.9, 73.2 (3 x t, 3 x PhCH<sub>2</sub>), 74.3 (d, C5b), 74.5, 74.6 (2 x t, 2 x PhCH<sub>2</sub>), 74.7 (d, C5a), 75.8 (d, C3c), 75.9 (d, C3a), 76.6 (d, C4a), 76.9 (d, C3b), 77.8 (d, C4c), 78.9 (d, C4b), 96.3 (d, C1a), 97.1 (d, C1b), 99.4 (d, C1c), 101.4 (d, PhCH), 116.9-129.2 (20 x d, 43 x ArC), 137.4, 137.8, 137.9, 138.2, 138.5, 138.6 (6 x s, 18 x ArC), 156.8 (s, ArC), 170.2 (s, CO).  $m/z$  ( $\text{ES}^+$ ) 1477 (100%,  $\text{M}+\text{NH}_4/\text{MeCN}^+$ ).



**Phenyl-2,3,4,6-tetra-*O*-acetyl- $\beta$ -D-mannopyranosyl-(1-4)-3,6-di-*O*-acetyl-2-deoxy-2-*N*-acetamido- $\beta$ -D-glucopyranosyl-(1-4)-3,6-di-*O*-acetyl-2-deoxy-2-*N*-acetamido- $\beta$ -D-glucopyranoside**

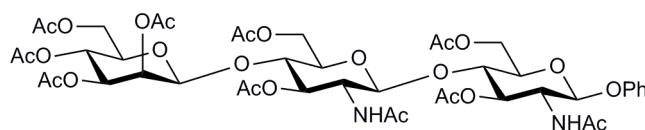

Phenyl-2-*O*-acetyl-3-*O*-benzyl-4,6-benzylidene- $\beta$ -D-mannopyranosyl-(1-4)-3,6-di-*O*-benzyl-2-deoxy-2-*N*-phthalamido- $\beta$ -D-glucopyranosyl-(1-4)-3,6-di-*O*-benzyl-2-deoxy-2-*N*-phthalamido- $\beta$ -D-glucopyranoside **17** (450 mg, 0.40 mmol) and Pearlman's catalyst (Pd(OH)<sub>2</sub>, moist, 300 mg) were suspended in absolute methanol (20 mL). The resulting solution was degassed and purged with hydrogen gas, then left to stir under an atmosphere of hydrogen. After a 24 h period, t.l.c. (ethyl acetate) indicated the formation of a major product ( $R_f$  0.0) with complete consumption of the starting material ( $R_f$  0.9). The solution was filtered through celite<sup>®</sup> and concentrated *in vacuo*. The resulting residue was resuspended in methanol (20 mL), and 1,2-ethylenediamine (5 mL) was added and the reaction was heated to 80 °C. After 16 h the reaction was co-evaporated with toluene (3 x 50 mL). The resulting residue was taken up in acetic anhydride (10 mL) and pyridine (20 mL). After 16 h, t.l.c. (ethyl acetate/methanol, 9:1) showed the formation of a product ( $R_f$  0.5) with complete consumption of the starting material ( $R_f$  0). The reaction was partitioned between chloroform (50 mL) and water (100 mL) and the phases separated. The aqueous phase was re-extracted with chloroform (2 x 50 mL). The combined organic layers were washed with dilute hydrochloric acid (300 mL, 1M aqueous solution), sodium hydrogen carbonate (50 mL of a saturated aqueous solution), brine (50 mL), dried (MgSO<sub>4</sub>), filtered and concentrated *in vacuo*. The resulting residue was purified by flash column chromatography to afford phenyl-2,3,4,6-tetra-*O*-acetyl- $\beta$ -D-mannopyranosyl-(1-4)-3,6-di-*O*-acetyl-2-deoxy-2-*N*-acetamido- $\beta$ -D-glucopyranosyl-(1-4)-3,6-di-*O*-acetyl-2-deoxy-2-*N*-acetamido- $\beta$ -D-glucopyranoside **39** (376 mg, 94%) as a white amorphous foam;  $[\alpha]_D^{22} +17.3$  (c, 0.45 in CHCl<sub>3</sub>);  $J_{\max}$  (KBr) 1778, 1747, 1714 (s, C=O) cm<sup>-1</sup>;  $\tau_{\text{H}}$  (500 MHz, CDCl<sub>3</sub>) 1.90, 1.94, 2.00, 2.01, 2.02, 2.03, 2.06, 2.07, 2.11 (30H, 9 x s, 10 x COCH<sub>3</sub>), 3.58-3.62 (2H, m, H5b, H5c), 3.79-3.83 (3H, m, H4a, H4b, H5a), 3.88 (1H, q,  $J$  9.3 Hz, H2b), 4.05-4.11 (2H, m, 2 x H6),

4.21-4.35 (5H, m, H2a, 4 x H6), 4.53 (1H, d,  $J_{1,2}$  8.2 Hz, H1b), 4.68 (1H, s, H1c), 4.99 (1H, dd,  $J_{2,3}$  3.3 Hz,  $J_{3,4}$  9.9 Hz, H3c), 5.07-5.11 (2H, m, H1a, H3b), 5.17 (1H, at,  $J$  10.0 Hz, H4c), 5.22 (1H, at,  $J$  8.1 Hz, H3a), 5.36 (1H, d,  $J_{2,3}$  3.1 Hz, H2c), 6.42-6.46 (2H, m, 2 x NH), 6.93 (2H, d,  $J$  7.8 Hz, 2 x ArH), 6.97 (1H, t,  $J$  7.8 Hz, ArH), 7.20 (2H, t,  $J$  7.9 Hz, ArH);  $^{13}\text{C}$  (125 MHz,  $\text{CDCl}_3$ ) 20.5, 20.6, 20.7, 20.8 (4 x q, 8 x  $\text{COCH}_3$ ), 23.1 (q, 2 x  $\text{NHCOCH}_3$ ), 53.1 (d, C2a), 54.2 (d, C2b), 62.2, 62.6, 62.7 (3 x t, C6a, C6b, C6c), 65.7 (d, C4c), 68.4 (d, C2c), 70.7 (d, C3c), 72.3 (2 x d, C5b, C5c), 72.5 (2 x d, C3a, C3b), 72.7, 74.5, 75.8 (3 x d, 5 x ArC), 156.9 (s, ArC), 169.5, 169.8, 170.3, 170.4, 170.5, 170.6, 170.7, 170.9, 171.1 (9 x s, 10 x CO).  $m/z$  ( $\text{ES}^+$ ) 1057 (100%,  $\text{M}+\text{NH}_4/\text{MeCN}^+$ ). HRMS found 999.3444. calcd 999.3452 for  $\text{C}_{44}\text{H}_{59}\text{O}_{24}\text{N}_2$ .

**Phenyl- $\beta$ -D-mannopyranosyl-(1-4)-2-deoxy-2-*N*-acetyl- $\beta$ -D-glucopyranosyl-(1-4)-2-deoxy-2-*N*-acetyl- $\beta$ -D-glucopyranoside**

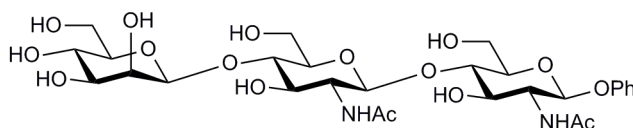

Phenyl-2,3,4,6-tetra-*O*-acetyl- $\beta$ -D-mannopyranosyl-(1-4)-3,6-di-*O*-acetyl-2-deoxy-2-*N*-acetamido- $\beta$ -D-glucopyranosyl-(1-4)-3,6-di-*O*-acetyl-2-deoxy-2-*N*-acetamido- $\beta$ -D-glucopyranoside **39** (210 mg, 0.21 mmol) and sodiummethoxide (3 mg, 0.04 mmol) were added to a stirred solution of methanol (10 mL). After 3 days the reaction was neutralised by the addition of Dowex-50 ion exchangeresin® after which point the reaction was filtered and concentrated *in vacuo* to afford phenyl- $\beta$ -D-mannopyranosyl-(1-4)-2-deoxy-2-*N*-acetyl- $\beta$ -D-glucopyranosyl-(1-4)-2-deoxy-2-*N*-acetyl- $\beta$ -D-glucopyranoside **3** (120 mg, 86%) as a white amorphous solid;  $[\alpha]_D^{20}$  -12.0 (c, 0.85 in CHCl<sub>3</sub>);  $\nu_{\max}$  (KBr) 1753, 1713 (s, C=O) cm<sup>-1</sup>;  $\delta_H$  (500 MHz, D<sub>2</sub>O) 1.94, 1.99 (6H, 2 x s, 2 x NHAc), 3.32-3.36 (1H, m, H-5c), 3.47-3.75 (12H, m, H-2b, H-3a, H-3b, H-3c, H-4a, H-4b, H-4c, H-5a, H-5b, H-6a, H-6b, H-6c), 3.78-3.86 (3H, m, H-6'a, H-6'b, H-6'c), 3.93 (1H, dd,  $J_{1,2}$  8.8 Hz,  $J_{2,3}$  10.2 Hz, H-2a), 3.98 (1H, bd,  $J_{2,3}$  3.1 Hz, H-2c), 4.54 (1H, d,  $J_{1,2}$  8.0 Hz, H-1b), 4.68 (1H, s, H-1c), 5.06 (1H, d,  $J_{1,2}$  8.6 Hz, H-1a), 6.97 (2H, d,  $J$  7.8 Hz, ArH), 7.06 (1H, t,  $J$  7.2 Hz, ArH), 7.30 (2H, m, 7.9 Hz, ArH);  $\delta_C$  (125 MHz, D<sub>2</sub>O) 22.0, 22.1 (2 x q, 2 x OAc), 54.9 (d, C-2a), 55.0 (d, C-2b), 59.9, 60.0, 60.9 (3 x t, C-6a, C-6b, C-6c), 66.6 (d, C-2c), 70.5, 71.9, 72.1, 72.7, 74.6, 74.7, 78.6, 78.9 (8 x d, C-3a, C-3b, C-3c, C-4a, C-4b, C-4c, C-5a, C-5b), 76.4 (d, C-5c), 99.4 (d, C-1a), 100.1 (d, C-1c), 101.4 (d, C-1b), 116.6, 123.4, 129.9 (3x d, 5 x ArC), 174.6, 174.8 (2 x s, 2 x C=O).  $m/z$  (ES<sup>-</sup>) 661 (100%, M-H<sup>+</sup>); ESI<sup>+</sup> [C<sub>28</sub>H<sub>42</sub>N<sub>2</sub>NaO<sub>16</sub>] requires 685.2427, found 685.2417.

## Synthesis of compound 4.

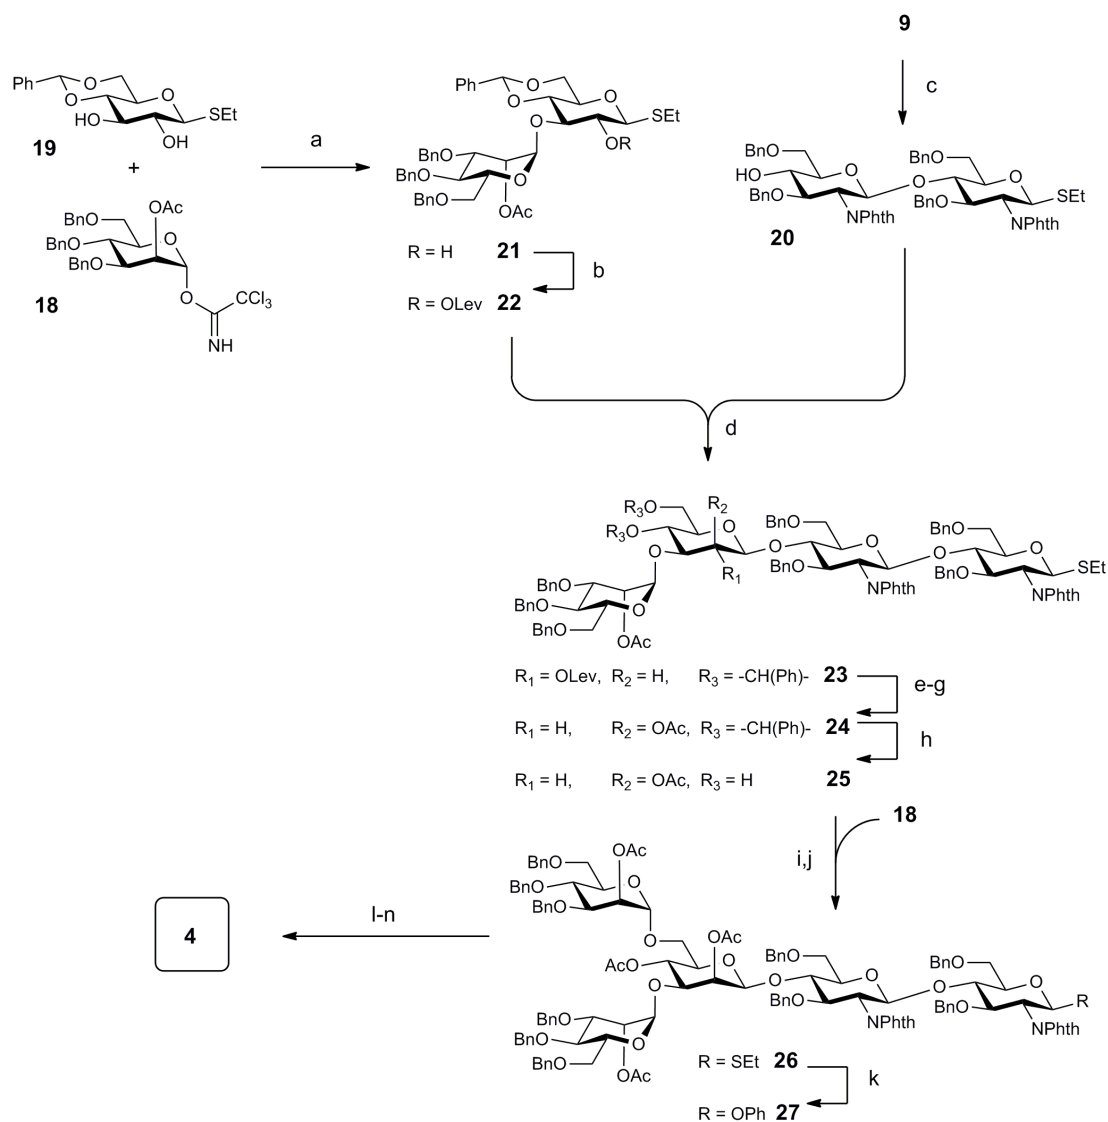

*Reagents & conditions:* a) TMS-OTf, DCM, -78°C, 76%; b) LevOH, DIC, DCM, 94%; c) NaBH<sub>3</sub>CN, HCl/dioxane, THF, 0°C-rt, 91%; d) Ph<sub>2</sub>O, Tf<sub>2</sub>O, DTBMP, DCM, -40 °C – rt, 64%; e) H<sub>2</sub>NNH<sub>2</sub>.HOAc, MeOH, 55 °C, 64%; f) Tf<sub>2</sub>O, DCM, pyridine; g) u<sub>4</sub>N.OAc, toluene, ))) , 88% over two steps; h) TsOH.H<sub>2</sub>O, MeOH, 1,4-Dioxane, 85 °C, 92%; i) **18**, TMS-OTf, DCM, -40 °C, 85%; j) Ac<sub>2</sub>O, pyridine; k) PhOH, NIS, TMS-OTf, DCM, 4Å MS, -10 °C, 48% over two steps; l) 1,2-ethylenediamine, MeOH, Δ, then Ac<sub>2</sub>O, pyridine, 80% over two steps; m) H<sub>2</sub>, Pd(OH)<sub>2</sub>-C, MeOH, 97%; n) NaOMe, MeOH, 88%.

### Ethyl-2,3,4,6-tetra-*O*-acetyl-1-thio- $\beta$ -D-glucopyranoside<sup>[22]</sup>

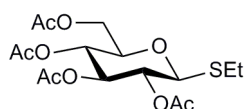

Tin (IV) chloride (1.12 ml, 9.61 mmol) was added dropwise to a solution of pentaacetyl-D-glucose (25.00g, 64.05 mmol) and ethanethiol (5.69 ml, 76.86 mmol) in dry dichloromethane (250 ml) at rt under an atmosphere of nitrogen. The reaction mixture was stirred at rt for 19h by which time TLC analysis (2:1 petrol/EtOAc) indicated that all starting material was consumed and one major ( $R_f=0.32$ ) and one minor ( $R_f=0.40$ ) product had formed. The reaction mixture was diluted with dichloromethane (150 ml) and washed with saturated aqueous sodium hydrogencarbonate solution (3x 200ml) and brine (200 ml), dried ( $MgSO_4$ ), filtered and concentrated *in vacuo* to give a pale yellow oil. The oil was dissolved in boiling hexane/ethanol (3:1) and upon cooling ethyl-2,3,4,6-tetra-*O*-acetyl-1-thio- $\beta$ -D-glucopyranoside **33** precipitated as a white solid (24.73g, 98%); m.p. 79-83 °C;  $[\alpha]_D^{25}$  -29.3 (c=1.0,  $CHCl_3$ ) [lit.  $[\alpha]_D^{25}$  -28 (c=1.0,  $CHCl_3$ )<sup>[23]</sup>];  $\delta_H$  (400 MHz,  $CDCl_3$ ) 1.26 (3H, t,  $J$  7.5,  $-CH_2CH_3$ ), 2.00 (3H, s, -OAc), 2.02 (3H, s, -OAc), 2.05 (3H, s, -OAc), 2.07 (3H, s, -OAc), 2.67 (1H, dq,  $J$  12.4, 7.5, -SCHH-), 2.73 (1H, dq,  $J$  12.4, 7.5, -SCHH-), 3.70 (1H, ddd,  $J$  9.9, 5.0, 1.9, 5-H), 4.13 (1H, dd,  $J$  12.2, 1.9, 6-HH), 4.24 (1H, dd,  $J$  12.2, 5.0, 6-HH), 4.49 (1H, d,  $J$  10.0, 1-H), 5.03 (1H, dd,  $J$  10.0, 9.4, 2-H), 5.07 (1H, dd,  $J$  9.9, 9.4, 4-H), 5.21 (1H, app t,  $J$  9.4, 3-H);  $\delta_C$  (100 MHz,  $CDCl_3$ ) 14.8 ( $-SCH_2CH_3$ ), 20.57 (-OAc), 20.60 (-OAc), 20.7 (2x -OAc), 24.2 ( $-SCH_2CH_3$ ), 62.1 (C-6), 68.3 (C-4), 69.8 (C-2), 73.9 (C-3), 75.8 (C-5), 83.5 (C-1), 169.37, 169.39, 170.2, 170.6;  $m/z$  ( $ES^+$ ) 415.08 ( $[M.Na]^+$ , 100%).

### Ethyl-4,6-*O*-benzylidene-1-thio- $\beta$ -D-glucopyranoside<sup>[24]</sup>

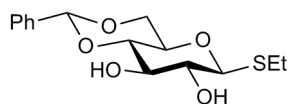

Sodium methoxide (4.37M solution in MeOH, 1.86 ml, 8.15 mmol) was added to a solution of ethyl-2,3,4,6-tetra-*O*-acetyl-1-thio- $\beta$ -D-glucopyranoside **33** (16.00 g, 40.77 mmol) in dry MeOH (150 ml) at rt under an atmosphere of nitrogen. The reaction mixture was stirred at rt for 18h. Activated Dowex-H<sup>+</sup> resin (4g) was added and the mixture stirred at rt for 1h then filtered and concentrated *in vacuo* to give a colourless oil. The oil was dissolved in dry MeCN (250 ml) at rt under an atmosphere of nitrogen. Benzaldehyde dimethylacetal (7.29 ml, 48.6 mmol) followed by *p*-toluenesulfonic acid monohydrate (200 mg, 1.1 mmol) were added. The reaction mixture was stirred at rt for 14h then triethylamine (1.5 ml, 10.1 mmol) was added, the mixture was stirred for 15 min then concentrated *in vacuo* to give a yellow oil which was purified using a Biotage by column chromatography on silica gel eluting with an increasing proportion of MeOH/DCM from 2-8% to afford ethyl-4,6-*O*-benzylidene-1-thio- $\beta$ -D-glucopyranoside **19** (10.86g, 86%) as a white solid;  $[\alpha]_{\text{D}}^{25}$  -54.6 (c=1.0, CHCl<sub>3</sub>) [lit.  $[\alpha]_{\text{D}}^{25}$  -61 (c=1.0, CHCl<sub>3</sub>)<sup>[19]</sup>; 1.33 (3H, t, *J* 7.4, -CH<sub>2</sub>CH<sub>3</sub>), 2.72-2.79 (2H, m, -SCH<sub>2</sub>-), 3.45-3.53 (2H, m, 2-*H*, 5-*H*), 3.56 (1H, app t, *J* 8.8, 3-*H*), 3.75 (1H, app t, *J* 10.5, 6-*HH*), 3.81 (1H, app t, *J* 8.8, 4-*H*), 4.34 (1H, dd, *J* 10.5, 4.7, 6-*HH*), 4.45 (1H, d, *J* 9.9, 1-*H*), 5.53 (1H, s, PhCH-), 7.35-7.41 (3H, m, 3x Ar-*H*), 7.47-7.52 (2H, m, 2 Ar-*H*);  $\delta_{\text{C}}$  (100 MHz, CDCl<sub>3</sub>) 15.2 (-SCH<sub>2</sub>CH<sub>3</sub>), 24.7 (-SCH<sub>2</sub>CH<sub>3</sub>), 68.6 (C-6), 70.5 (C-5), 73.2 (C-2), 74.5 (C-4), 80.3 (C-3), 86.5 (C-1), 101.5 (PhCH-), 126.3, 128.4, 129.3, 136.9; *m/z* (ES<sup>+</sup>) 335.10 ([M.Na]<sup>+</sup>, 26%), 647.17 ([2M.Na]<sup>+</sup>, 100%).

### 3,4,6-Tri-*O*-acetyl-1,2-*O*-(1-*R*-methoxyethylidene)- $\beta$ -D-mannopyranose<sup>[25]</sup>

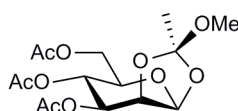

Hydrobromic acid (33% in acetic acid, 173.0 ml, 986 mmol) was added slowly over 1h to a solution of penta-*O*-acetyl-mannose (110.0g, 282 mmol) in dry dichloromethane (300 ml) at rt under a nitrogen atmosphere. After 3h TLC analysis (30% EtOAc/petrol) indicated the formation of a single product ( $R_f = 0.32$ ) and complete consumption of the starting material ( $R_f = 0.23$ ). Dichloromethane (200 ml) and ice-water (200 ml) were added. The layers were separated and the organic phase was extracted with dichloromethane (3x 150 ml). The combined organic layers were washed with water until the pH was neutral then washed with brine (200 ml), dried ( $\text{MgSO}_4$ ), filtered and concentrated *in vacuo*. The resulting pale yellow oil was dissolved in dry tetrahydrofuran (500 ml) and dry methanol (11.3 ml, 280 mmol) at room temperature under a nitrogen atmosphere. 2,6-Lutidine (130 ml, 1120 mmol) was added and the mixture was heated at 80 °C for 5h then cooled to room temperature and concentrated *in vacuo*. The residue was diluted with ethyl acetate (250 ml) and water (250 ml). The layers were separated and the aqueous phase was extracted with ethyl acetate (3x 150 ml). The combined organic extracts were washed with saturated aqueous sodium hydrogencarbonate solution (150 ml) and brine (150 ml), dried ( $\text{MgSO}_4$ ), filtered and concentrated *in vacuo* to give a pale yellow solid which was purified by recrystallisation from 30% methanol/water to give 3,4,6-tri-*O*-acetyl-1,2-*O*-(1-*R*-methoxyethylidene)- $\beta$ -D-mannopyranose **40** as a white solid (77.1 g, 76%); m.p. 99-102 °C [lit. 114-115 °C]<sup>[26]</sup>;  $[\alpha]_D^{18} -22.3$  (c=1.0,  $\text{CHCl}_3$ ), [lit.  $[\alpha]_D^{18} -21.4$  (c=1.8,  $\text{CHCl}_3$ )]<sup>[26]</sup>;  $\delta_H$  (400 MHz,  $\text{CDCl}_3$ ) 1.74 (3H, s, -Me), 2.05 (3H, s, -OAc), 2.07 (3H, s, -OAc), 2.12 (3H, s, -OAc), 3.28 (3H, s, -OMe), 3.68 (1H, ddd,  $J$  9.7, 5.0, 2.6, 5-H), 4.14 (1H, dd,  $J$  12.1, 2.6, 6-*HH*), 4.24 (1H, dd,  $J$  12.1, 5.0, 6-*HH*), 4.61 (1H, dd,  $J$  3.9, 2.5, 2-H), 5.14 (1H, dd,  $J$  9.7, 3.9, 3-H), 5.30 (1H, app t,  $J$  9.7, 4-H), 5.49 (1H, d,  $J$  2.5, 1-H);  $\delta_C$  (100 MHz,  $\text{CDCl}_3$ ) 20.65 (-OAc), 20.69 (-OAc), 20.73 (-OAc), 24.4 (- $\text{CH}_3$ ), 49.9 (- $\text{OCH}_3$ ), 62.3 (C-6), 65.5 (C-4), 70.6 (C-3), 71.3 (C-5), 76.6 (C-2), 97.3 (C-1), 124.5 (C-7), 169.4 (-OAc), 170.4 (-OAc), 170.6 (-OAc);  $m/z$  ( $\text{ES}^+$ ) 385.1 ( $[\text{MNa}]^+$ , 19%), 421.2 ( $[\text{M}(\text{MeCN})\text{NH}_4]^+$ , 100%).

### 3,4,6-Tri-*O*-benzyl-1,2-*O*-(1-*R*-methoxyethylidene)- $\beta$ -D-mannopyranose<sup>[27]</sup>

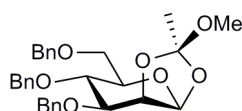

A mixture of 3,4,6-tri-*O*-acetyl-1,2-*O*-(1-*R*-methoxyethylidene)- $\beta$ -D-mannopyranose **40** (25.0 g, 69.0 mmol) and benzyl chloride (140 ml, 1173 mmol) in dry tetrahydrofuran (40 ml) was heated to reflux under nitrogen. The heat source was removed and freshly crushed potassium hydroxide (50.0 g, 897 mmol) was added portion-wise (*Care*: exotherm!). The mixture was stirred for 36h then water (200 ml) and dichloromethane (150 ml) were added. The layers were separated and the aqueous phase was extracted with dichloromethane (150 ml). The combined organic extracts were washed with saturated aqueous sodium hydrogencarbonate solution (2x 150 ml) and brine (150 ml), dried (MgSO<sub>4</sub>), filtered and concentrated *in vacuo* to give a yellow oil which solidified on standing. The yellow solid was recrystallised from diethyl ether/hexane to give 3,4,6-tri-*O*-benzyl-1,2-*O*-(1-*R*-methoxyethylidene)- $\beta$ -D-mannopyranose **41** as white needles (26.3 g, 75%); m.p. 73-76 °C [lit. 87-88 °C]<sup>[28]</sup>;  $[\alpha]_{\text{D}}^{18} +33.7$  (c=1.0, CHCl<sub>3</sub>), [lit.  $[\alpha]_{\text{D}}^{18} +37.0$  (c=1.0, CHCl<sub>3</sub>)]<sup>[xxviii=23]</sup>; (400 MHz, CDCl<sub>3</sub>) 1.76 (3H, s, -Me), 3.30 (3H, s, -OMe), 3.44 (1H, ddd, *J* 9.4, 4.2, 2.4, 5-H), 3.70-3.80 (3H, m, 3-H, 6-H<sub>2</sub>), 3.94 (1H, dd, *J* 9.4, 8.9, 4-H), 4.41 (1H, dd, *J* 4.1, 2.6, 2-H), 4.57 (1H, d, *J* 11.8, PhCHH-), 4.60 (1H, d, *J* 11.4, PhCHH-), 4.63 (1H, d, *J* 11.8, PhCHH-), 4.78 (1H, d, *J* 12.1, PhCHH-), 4.82 (1H, d, *J* 12.1, PhCHH-), 4.92 (1H, d, *J* 11.4, PhCHH-), 5.37 (1H, d, *J* 2.6, 1-H);  $\delta_{\text{C}}$  (100 MHz, CDCl<sub>3</sub>) 24.4 (-CH<sub>3</sub>), 49.8 (-OCH<sub>3</sub>), 69.0 (C-6), 72.4 (PhCH<sub>2</sub>-), 73.4 (PhCH<sub>2</sub>-), 74.15 (C-5), 74.20 (C-4), 75.3 (PhCH<sub>2</sub>-), 77.1 (C-2), 97.6 (C-1), 124.0 (C-7), 127.5, 127.8, 128.0, 128.1, 128.3, 128.4, 128.5, 137.8, 138.2; %); *m/z* (ES<sup>+</sup>) 529.2 ([M.Na]<sup>+</sup>, 8%), 545.2 (34%), 565.3 ([M.NH<sub>4</sub>.MeCN]<sup>+</sup>, 100%).



## 2-*O*-Acetyl-3,4,6-tri-*O*-benzyl-D-mannopyranose<sup>[29]</sup>

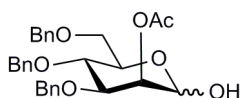

A solution of 3,4,6-tri-*O*-benzyl-1,2-*O*-(1-*R*-methoxyethylidene)- $\beta$ -D-mannopyranose **41** (38.0 g, 75.0 mmol) in acetic acid (300 ml) and water (200 ml) was stirred at r.t. for 4h whereupon TLC analysis (50% EtOAc/petrol) indicated the complete consumption of the starting material ( $R_f=0.62$ ) and formation of a three products ( $R_f=0.24, 0.36, 0.51$ ). The mixture was concentrated *in vacuo* and partitioned between water (400 ml) and ethyl acetate (400 ml). The layers were separated and the aqueous phase was extracted with ethyl acetate (2x 175 ml). The combined organic extracts were washed with saturated aqueous sodium hydrogencarbonate solution (2x 200 ml) and brine (200 ml), dried ( $MgSO_4$ ), filtered and concentrated *in vacuo* to give a yellow oil which was dissolved in dry pyridine (250 ml) under an atmosphere of nitrogen. The resulting solution was cooled to 0 °C and acetic anhydride (100 ml) was added dropwise over 30 min. The mixture was stirred for 16 h, slowly warming to r.t. whereupon TLC analysis (50% EtOAc/petrol) indicated the complete consumption of the starting materials ( $R_f=0.24, 0.36, 0.51$ ) and formation of a single product ( $R_f=0.88$ ). The mixture was concentrated *in vacuo* to give a pale yellow oil (39.0 g) which was dissolved in dry THF (400 ml) at r.t. under an atmosphere of nitrogen. Benzylamine (12.0 ml, 109.5 mmol) was added slowly and the resulting solution was stirred at r.t. for 22 h whereupon TLC analysis (50% EtOAc/petrol) indicated the complete consumption of the starting material ( $R_f=0.88$ ) and formation of a major product ( $R_f=0.66$ ). The mixture was concentrated *in vacuo* and dissolved in ethyl acetate (500 ml). The organic phase was washed with cold aqueous 1M HCl (2x 175 ml), saturated aqueous sodium hydrogencarbonate solution (200 ml) and brine (200 ml), dried ( $MgSO_4$ ), filtered and concentrated *in vacuo* to give a pale yellow oil (45.6 g) which was purified by flash column chromatography on silica gel (Biotage SNAP 340g) eluting with an increasing proportion of ethyl acetate/petrol from 8-66% to give 2-*O*-acetyl-3,4,6-tri-*O*-benzyl-D-mannopyranose **42** (34.34 g, 98%) as a pale yellow oil (predominantly  $\alpha$ -anomer): Data for **42- $\alpha$** :  $[\alpha]_D^{25} +17.8$  ( $c=1.0, CHCl_3$ ), [lit.  $[\alpha]_D^{25} +16.7$  ( $c=0.8, CHCl_3$ )]<sup>[30]</sup>,  $\delta_H$  (400 MHz,  $CDCl_3$ ) 2.18 (3H, s, -OAc), 3.68-3.74 (2H,

m, 6-*H*<sub>2</sub>), 3.75 (1H, t, *J* 9.5, 4-*H*), 4.07 (1H, dd, *J* 9.5, 3.1, 3-*H*), 4.08-4.14 (2H, m, 5-*H* and -*OH*), 4.49 (1H, d, *J* 10.9, -*CHHPh*), 4.53 (1H, d, *J* 12.1, -*CHHPh*), 4.55 (1H, d, *J* 11.1, -*CHHPh*), 4.63 (1H, d, *J* 12.1, -*CHHPh*), 4.73 (1H, d, *J* 11.1, -*CHHPh*), 4.89 (1H, d, *J* 10.9, -*CHHPh*), 5.22 (1H, br s, 1-*H*), 5.39 (1H, m, 2-*H*), 7.28-7.38 (15H, m, 15x Ar-*H*);  $\delta_{\text{C}}$  (100 MHz, CDCl<sub>3</sub>) 21.2 (-OC(O)CH<sub>3</sub>), 69.2 (C-2), 69.3 (C-6), 71.0 (C-5), 71.8 (-CH<sub>2</sub>Ph), 73.4 (-CH<sub>2</sub>Ph), 74.7 (C-4), 75.1 (-CH<sub>2</sub>Ph), 77.7 (C-3), 92.4 (C-1), 127.7, 127.8, 127.9, 128.10, 128.12, 128.35, 128.41, 128.42, 137.8, 137.9, 138.3, 170.6 (-OC(O)CH<sub>3</sub>).

**2-*O*-Acetyl-3,4,6-tri-*O*-benzyl- $\alpha$ -D-mannopyranosyl-1',1',1'-trichloroacetimidate<sup>[31]</sup>**

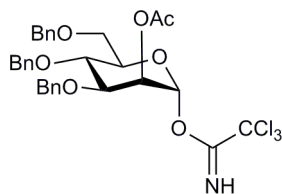

DBU (897  $\mu$ l, 6.0 mmol) was added to a solution of 2-*O*-acetyl-3,4,6-tri-*O*-benzyl-D-mannopyranose **42** (28.7 g, 60.0 mmol) and trichloroacetonitrile (30.1 ml, 300.0 mmol) in dry DCM (500 ml) at 0 °C under a nitrogen atmosphere. The reaction mixture was stirred at 0 °C for 1 h whereupon TLC analysis (33% EtOAc/petrol) indicated complete consumption of the starting material ( $R_f=0.18$ ) and formation of a single product ( $R_f=0.45$ ). The mixture was concentrated *in vacuo* and purified immediately by flash column chromatography on silica gel eluting with an increasing proportion of EtOAc/petrol from 17.5-25% to give 2-*O*-acetyl-3,4,6-tri-*O*-benzyl- $\alpha$ -D-mannopyranosyl-1',1',1'-trichloroacetimidate **18** as a pale yellow oil (35.44 g, 94%):  $[\alpha]_D^{25} +38.1$  ( $c=1.0$ ,  $\text{CHCl}_3$  [lit.  $[\alpha]_D^{25} +36.3$  ( $c=0.9$ ,  $\text{CHCl}_3$ )]<sup>[31]</sup>;  $\delta_H$  (400 MHz,  $\text{CDCl}_3$ ) 2.21 (3H, s, -OAc), 3.73 (1H, dd,  $J$  11.3, 1.1, 6-*HH*), 3.86 (1H, dd,  $J$  11.3, 3.5, 6-*HH*), 3.97-4.12 (3H, m, 3-H, 4-H, 5-H), 4.52 (1H, d,  $J$  10.9, PhCHH-), 4.54 (1H, d,  $J$  12.1, PhCHH-), 4.60 (1H, d,  $J$  11.3, PhCHH-), 4.70 (1H, d,  $J$  12.1, PhCHH-), 4.75 (1H, d,  $J$  11.3, PhCHH-), 4.89 (1H, d,  $J$  10.9, PhCHH-), 5.52 (1H, dd,  $J$  2.4, 1.5, H-2), 6.32 (1H, d,  $J$  1.5, 1-H), 7.26-7.40 (15H, m, 15x Ar-*H*), 8.70 (1H, s, NH);  $\delta_C$  (400 MHz,  $\text{CDCl}_3$ ) 21.0 (-OAc), 67.3 (C-2), 68.4 (C-6), 72.1(PhCH<sub>2</sub>-), 73.4 (PhCH<sub>2</sub>-), 73.7, 74.4, 75.5 (PhCH<sub>2</sub>-), 77.4, 90.8 (-CCl<sub>3</sub>), 95.4 (C-1), 127.6, 127.8, 127.9, 128.1, 128.30, 128.33, 128.4, 128.5, 137.5, 138.1, 138.2, 160.0, 170.1 (-OAc);  $m/z$  ( $\text{ES}^+$ ) 636.37 ( $[\text{M.Na}]^+$ , 10%), 557.21 (74%), 529.19 (100%).

**Ethyl-2-*O*-acetyl-3,4,6-tri-*O*-benzyl- $\alpha$ -D-mannopyranoside-(1-3)-4,6-*O*-benzylidene-1-thio- $\beta$ -D-glucopyranoside<sup>[14]</sup>**

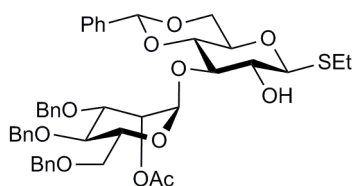

A mixture of 2-*O*-acetyl-3,4,6-tri-*O*-benzyl- $\alpha$ -D-mannopyranosyl-1',1',1'-trichloroacetimidate **18** (600 mg, 0.94 mmol) and ethyl-4,6-*O*-benzylidene-1-thio- $\beta$ -D-glucopyranoside **19** (245 mg, 0.79 mmol) were concentrated *in vacuo* from toluene (2x 30 ml), dried under vacuum, dissolved in dry DCM (20 ml) and added *via* cannula to a flask containing freshly activated 4Å molecular sieves (0.5 g) at r.t. under a nitrogen atmosphere. The resulting suspension was stirred at r.t. for 1 h then cooled to -78 °C and trimethylsilyltrifluoromethanesulfonate (14  $\mu$ l, 0.08 mmol) was added. The reaction mixture was stirred for 19 h slowly warming to 10 °C, whereupon TLC analysis (33% EtOAc/petrol) indicated complete consumption of **18** (Rf=0.60) and **19** (Rf=0.11) and the formation of a major product (Rf=0.48). Triethylamine (50  $\mu$ l) was added and the mixture was filtered through celite and diluted with DCM (40 ml) and saturated aqueous sodium hydrogencarbonate solution (30 ml). The layers were separated and the aqueous layer was extracted with DCM (3x 20 ml). The combined organic layers were washed with saturated aqueous sodium hydrogencarbonate solution (30 ml) water (30 ml) and brine (30 ml), dried (MgSO<sub>4</sub>), filtered and concentrated *in vacuo* to give a residue which was recrystallised from EtOAc/petrol to give ethyl-2-*O*-acetyl-3,4,6-tri-*O*-benzyl- $\alpha$ -D-mannopyranoside-(1-3)-4,6-*O*-benzylidene-1-thio- $\beta$ -D-glucopyranoside **21** as a white solid (CB322-2, 341 mg, 55 %): m.p. 130-135 °C;  $[\alpha]_D^{25}$  -24.1 (c=1.0, CHCl<sub>3</sub>) [lit.  $[\alpha]_D^{25}$  -24 (c=0.6, CHCl<sub>3</sub>)<sup>[14]</sup>;  $\delta_H$  (500 MHz, CDCl<sub>3</sub>) 1.32 (3H, t, *J* 7.5, -SCH<sub>2</sub>CH<sub>3</sub>), 2.12 (3H, s, -OAc), 2.74 (1H, dq, *J* 12.6, 7.5, -SCHHCH<sub>3</sub>), 2.75 (1H, dq, *J* 12.6, 7.5, -SCHHCH<sub>3</sub>), 3.01 (1H, d, *J* 3.2, -OH), 3.44 - 3.54 (2H, m, 2*c*-H, 5*c*-H), 3.66 (1H, t, *J* 9.1, 4*c*-H), 3.73 (1H, dd, *J* 10.4, 1.9, 6*d*-HH), 3.77 (1H, t, *J* 10.4, 6*c*-HH), 3.79 (1H, dd, *J* 10.4, 4.7, 6*d*-HH), 3.89 (1H, t, *J* 9.5, 4*d*-H), 3.89 (1H, t, *J* 9.1, 3*c*-H), 4.03 (1H, dd, *J* 9.5, 3.5, 3*d*-H), 4.25 (1H, ddd, *J* 9.5, 4.4, 1.9, 5*d*-H), 4.37 (1H, dd, *J* 10.4, 5.0, 6*c*-HH), 4.42 (1H, d, *J* 9.8, 1*c*-H), 4.49 (1H, d, *J* 10.7, -CHHPh), 4.51 (1H, d, *J* 12.0, -CHHPh), 4.53 (1H, d, *J*

11.0, -CHHPh), 4.70 (1H, d, *J* 12.0, -CHHPh), 4.71 (1H, d, *J* 11.0, -CHHPh), 4.86 (1H, d, *J* 10.7, -CHHPh), 5.28 (1H, d, *J* 1.6, 1d-*H*), 5.55 (1H, dd, *J* 3.5, 1.6, 2d-*H*), 5.58 (1H, s, -CHPh), 7.16 - 7.19 (2H, m, 2x Ar-*H*), 7.25 – 7.39 (16H, m, 16x Ar-*H*), 7.45 – 7.49 (2H, m, 2x Ar-*H*);  $\delta_C$  (125 MHz, CDCl<sub>3</sub>) 15.2 (-SCH<sub>2</sub>CH<sub>3</sub>), 21.0 (-OAc), 24.7 (-SCH<sub>2</sub>CH<sub>3</sub>), 68.5 (2C, C-6c, C-6d), 68.8 (C-2d), 70.4 (C-5c), 71.6 (C-5d), 71.8 (-CH<sub>2</sub>Ph), 72.1 (C-2c), 73.4 (-CH<sub>2</sub>Ph), 74.3 (C-4d), 75.1 (-CH<sub>2</sub>Ph), 78.1 (C-3d), 79.9 (C-3c), 80.6 (C-4c), 87.0 (C-1c), 98.7 (C-1d), 101.0 (C-7d), 125.9 (2x C-Ar), 127.60 (C-Ar), 127.62 (C-Ar), 127.7 (C-Ar), 127.89 (2x C-Ar), 127.93 (2x C-Ar), 128.0 (2x C-Ar), 128.2 (2x C-Ar), 128.29 (2x C-Ar), 128.32 (2x C-Ar), 128.4 (2x C-Ar), 128.9 (C-Ar), 136.9 (C-Ar), 138.0 (C-Ar), 138.1 (C-Ar), 138.4 (C-Ar), 170.1 (-OAc); *m/z* (ES<sup>+</sup>) 809.28 ([M.Na]<sup>+</sup>, 100%); ESI<sup>+</sup> [C<sub>44</sub>H<sub>50</sub>NaO<sub>11</sub>S] requires 809.2966, found 809.2976.

**Ethyl-2-*O*-acetyl-3,4,6-tri-*O*-benzyl- $\alpha$ -D-mannopyranosyl-(1-3)-4,6-*O*-benzylidene-2-levulinoyl-1-thio- $\beta$ -D-glucopyranoside<sup>[14]</sup>**

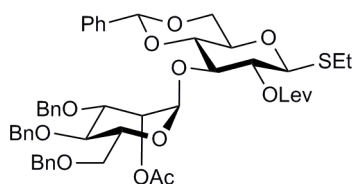

*N,N*-DIC (6.45 ml, 41.4 mmol) was added to a solution of ethyl-2-*O*-acetyl-3,4,6-tri-*O*-benzyl- $\alpha$ -D-mannopyranoside-(1-3)-4,6-*O*-benzylidene-1-thio- $\beta$ -D-glucopyranoside **21** (16.3 g, 20.7 mmol), levulinic acid (5.30 ml, 51.8 mmol) and DMAP (114 mg, 2.0 mmol) in dry DCM (400 ml) at r.t. under a nitrogen atmosphere. The resulting solution was stirred at r.t. for 26 h whereupon TLC analysis (33% EtOAc/petrol) indicated the complete consumption of the starting material ( $R_f=0.44$ ) and formation of a major product ( $R_f=0.40$ ). The mixture was diluted with DCM (300 ml) and water (300 ml). The layers were separated and the aqueous layer was extracted with DCM (3x 150 ml). The combined organic layers were washed with saturated aqueous sodium hydrogencarbonate solution (2x 200 ml) and brine (2x 200 ml), dried ( $MgSO_4$ ), filtered and concentrated *in vacuo* to give a brown oil which was purified by flash column chromatography on silica gel (Biotage SNAP 340g) eluting with an increasing proportion of diethyl ether/petrol from 20-100% to give ethyl-2-*O*-acetyl-3,4,6-tri-*O*-benzyl- $\alpha$ -D-mannopyranosyl-(1-3)-4,6-*O*-benzylidene-2-levulinoyl-1-thio- $\beta$ -D-glucopyranoside **22** as a colourless oil (17.21 g, 94%):  $[\alpha]_D^{25}$  -11.1 ( $c=1.0$ ,  $CHCl_3$ ) [lit.  $[\alpha]_D^{25}$  -35.0 ( $c=1.0$ ,  $CHCl_3$ )<sup>[14]</sup>];  $\delta_H$  (400 MHz,  $CDCl_3$ ) 1.28 (3H, t,  $J$  7.4, - $SCH_2CH_3$ ), 1.90 (3H, s, - $C(O)CH_3$ ), 2.10 (3H, s, -OAc), 2.32-2.78 (6H, m, - $SCH_2CH_3$ , 1'- $H_2$  and 2'- $H_2$ ), 3.51 (1H, td,  $J$  9.6, 5.1, 5c- $H$ ), 3.71-3.90 (7H, m, 4c- $H$ , 6c- $HH$ , 3d- $H$ , 4d- $H$ , 5d- $H$  and 6d- $H_2$ ), 4.10 (1H, t,  $J$  9.6, 3c- $H$ ), 4.39 (1H, dd,  $J$  10.6, 5.1, 6c- $HH$ ), 4.50 (1H, d,  $J$  11.1, - $CHHPh$ ), 4.54 (1H, d,  $J$  12.3, - $CHHPh$ ), 4.68 (1H, d,  $J$  11.1, - $CHHPh$ ), 4.69 (1H, d,  $J$  12.3, - $CHHPh$ ), 4.83 (1H, d,  $J$  11.1, - $CHHPh$ ), 5.06 (1H, t,  $J$  9.6, 2c- $H$ ), 5.42 (1H, d,  $J$  1.3, 1d- $H$ ), 5.48 (1H, dd,  $J$  2.0, 1.3, 2d- $H$ ), 5.59 (1H, s, 7- $H$ ), 7.07-7.13 (2H, m, 2x Ar- $H$ ), 7.23-7.39 (16H, m, 16x Ar- $H$ ), 7.43-7.47 (2H, m, 2x Ar- $H$ );  $\delta_C$  (100 MHz,  $CDCl_3$ ) 14.9 (- $SCH_2CH_3$ ), 21.1 (- $OC(O)CH_3$ ), 24.2 (- $CH_2CH_2-$ ), 27.9 (- $CH_2CH_2-$ ), 29.6 (- $C(O)CH_3$ ), 37.5 (- $SCH_2CH_3$ ), 68.1 (C-2d), 68.5 (C-6c), 68.8 (C-6d), 70.3 (C-2c), 70.4 (C-5c), 71.7 (- $CH_2Ph$ ), 71.8

(C-5d), 73.4 (-CH<sub>2</sub>Ph), 73.9 (C-4d), 74.8 (C-3c), 75.0 (-CH<sub>2</sub>Ph), 77.9 (C-3d), 81.6 (C-4c), 84.3 (C-1c), 97.4 (C-1d), 101.2 (-CHPh), 126.1, 127.5, 127.6, 127.7, 127.8, 128.18, 128.22, 128.28, 128.34, 128.4, 129.0, 136.7, 137.9, 138.2, 138.6, 170.2, 171.5, 206.0; ESI<sup>+</sup> [C<sub>49</sub>H<sub>56</sub>NaO<sub>13</sub>S] requires 907.3334, found 907.3333.

**Ethyl-3,6-di-*O*-benzyl-2-deoxy-2-*N*-phthalamido- $\beta$ -D-glucopyranosyl-(1-4)-3,6-di-*O*-benzyl-2-deoxy-2-*N*-phthalamido-1-thio- $\beta$ -D-glucopyranoside**

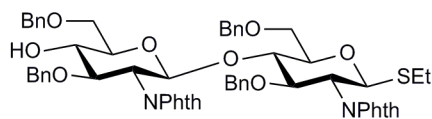

A solution of ethyl-3-*O*-benzyl-4,6-*O*-benzylidene-2-deoxy-2-*N*-phthalamido- $\beta$ -D-glucopyranosyl-(1-4)-3,6-di-*O*-benzyl-2-deoxy-2-*N*-phthalamido-1-thio- $\beta$ -D-glucopyranoside **9** (14.20g, 14.16 mmol) in dry THF (60 ml + 60 ml washings) was added *via* cannula to a suspension of sodium cyanoborohydride (8.90 g, 141.16 mmol), methyl orange (~2mg) and freshly activated 3Å molecular sieves (3.0 g) in dry THF (280 ml) at 0°C under a nitrogen atmosphere. HCl (4M solution in dioxane) was added slowly (Caution: effervescence) until the yellow colour of the solution changed to a persistent pink. The resulting reaction mixture was stirred 21h slowly warming to r.t. whereupon TLC analysis (40% EtOAc/petrol) indicated the complete consumption of the starting material ( $R_f=0.49$ ) and formation of a single product ( $R_f=0.35$ ). The reaction was quenched by addition to saturated aqueous sodium hydrogencarbonate solution (500 ml). The resulting yellow solution was filtered through celite and the layers were separated. The aqueous layer was extracted with DCM (3x 200 ml). The combined organic layers were washed with saturated aqueous sodium hydrogencarbonate solution (2x 200 ml) and brine (200 ml), dried ( $MgSO_4$ ), filtered and concentrated *in vacuo* to give a pale yellow oil which was dissolved in methanol (1000 ml) and heated at 55 °C for 6h then concentrated *in vacuo* to give a yellow foam which was purified by flash column chromatography on silica gel eluting with 6%  $Et_2O/DCM$  to give ethyl-3,6-di-*O*-benzyl-2-deoxy-2-*N*-phthalamido- $\beta$ -D-glucopyranosyl-(1-4)-3,6-di-*O*-benzyl-2-deoxy-2-*N*-phthalamido-1-thio- $\beta$ -D-glucopyranoside **20** as a white solid (12.91 g, 91%):  $[\alpha]_D^{18} +18.8$  ( $c=0.5$ ,  $CHCl_3$ );  $\delta_H$  (500 MHz,  $CDCl_3$ ) 1.11 (3H, t,  $J$  7.6,  $-SCH_2CH_3$ ), 2.51 (1H, dq,  $J$  12.6, 7.6,  $-SCHHCH_3$ ), 2.59 (1H, dq,  $J$  12.6, 7.6,  $-SCHHCH_3$ ), 3.13 (1H, d,  $J$  1.9,  $-OH$ ), 3.33-3.41 (2H, m, 5a-*H*, 5b-*H*), 3.43 (1H, dd,  $J$  11.2, 3.9, 6a-*HH*), 3.53-3.59 (2H, m, 6a-*HH*, 6b-*HH*), 3.71 (1H, dd,  $J$  9.9, 4.3, 6b-*HH*), 3.82 (1H, td,  $J$  8.6, 1.9, 4b-*H*), 4.15-4.22 (4H, m, 2a-*H*, 2b-*H*, 3a-*H*, 4a-*H*), 4.26 (1H, dd,  $J$  10.7, 8.6, 3b-*H*), 4.46-4.55 (6H, m, 6x  $-CHPh-$ ), 4.80 (1H, d,  $J$  12.3,  $-CHHPh$ ), 4.81(1H, d,  $J$  12.3,  $-CHHPh$ ),



5.08 (1H, d,  $J$  9.2, 1a-*H*), 5.32 (1H, d,  $J$  8.2, 1b-*H*), 6.83-6.87 (3H, m, 3x Ar-*H*), 6.93-6.97 (3H, m, 3x Ar-*H*), 6.98-7.01 (2H, m, 2x Ar-*H*), 7.03-7.06 (2H, m, 2x Ar-*H*), 7.25-7.39 (1H, m, Ar-*H*), 7.57-7.80 (6H, m, 6x Ar-*H*), 7.86-7.91 (1H, m, Ar-*H*);  $\delta_C$  (125 MHz, CDCl<sub>3</sub>) 14.9 (-SCH<sub>2</sub>CH<sub>3</sub>), 23.6 (-SCH<sub>2</sub>CH<sub>3</sub>), 54.7 (C-2a), 56.1 (C-2b), 68.3 (C-6a), 70.9 (C-6b), 72.6 (-CH<sub>2</sub>Ph), 72.8 (C-5b), 73.7 (-CH<sub>2</sub>Ph), 74.3 (-CH<sub>2</sub>Ph), 75.4 (C-4b), 75.5 (C-3a), 77.6 (C-4a), 78.3 (C-3b), 78.8 (C-5a), 80.7 (C-1a), 96.9 (C-1b), 123.2, 123.4, 123.6, 126.9, 127.3, 127.4, 127.7, 127.75, 127.84, 127.9, 128.1, 128.2, 128.5, 131.6, 133.6, 133.7, 133.9, 134.0, 137.5, 138.3, 138.4, 138.5, 167.5, 167.7, 167.8, 168.4; ESI<sup>+</sup> [C<sub>58</sub>H<sub>56</sub>N<sub>2</sub>NaO<sub>12</sub>S] requires 1027.3446, found 1027.3463.

**Ethyl-2-*O*-acetyl-3,4,6-tri-*O*-benzyl- $\alpha$ -D-mannopyranosyl-(1-3)-4,6-*O*-benzylidene-2-levulinoyl- $\beta$ -D-glucopyranosyl-(1-4)-3,6-di-*O*-benzyl-2-deoxy-2-*N*-phthalamido- $\beta$ -D-glucopyranosyl-(1-4)-3,6-di-*O*-benzyl-2-deoxy-2-*N*-phthalamido-1-thio- $\beta$ -D-glucopyranoside**

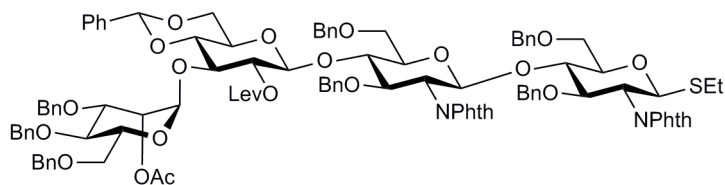

A mixture of ethyl-2-*O*-acetyl-3,4,6-tri-*O*-benzyl- $\alpha$ -D-mannopyranosyl-(1-3)-4,6-*O*-benzylidene-2-levulinoyl-1-thio- $\beta$ -D-glucopyranoside **22** (89 mg, 0.10 mmol), 2,6-di-*tert*-butyl-4-methylpyridine (51 mg, 0.25 mmol) and diphenylsulfoxide (40 mg, 0.20 mmol) were concentrated from toluene (3x 20 ml), dissolved in dry DCM (10 ml) under a nitrogen atmosphere and added *via* cannula to a flask containing freshly activated 4Å molecular sieves (150 mg) at r.t. under a nitrogen atmosphere. The suspension was stirred at r.t. for 30 min then cooled to -40 °C. Triflic anhydride (17  $\mu$ l, 0.10 mmol) was added and the mixture was stirred for 40 min. A solution of ethyl-3,6-di-*O*-benzyl-2-deoxy-2-*N*-phthalamido- $\beta$ -D-glucopyranosyl-(1-4)-3,6-di-*O*-benzyl-2-deoxy-2-*N*-phthalamido-1-thio- $\beta$ -D-glucopyranoside **20** (100 mg, 0.10 mmol) in dry DCM (5 ml) was added dropwise *via* cannula. The resulting solution was stirred at -40 °C for 45 min then warmed to 0 °C and stirred for 22 h slowly warming to r.t. whereupon TLC analysis (20% EtOAc/toluene) indicated the complete consumption of the starting material **20** (Rf=0.40) and formation of a major product (Rf=0.53). Saturated aqueous sodium hydrogencarbonate solution (20 ml) was added and the layers were separated. The aqueous layer was extracted with DCM (2x 15 ml). The combined organic layers were washed with saturated aqueous sodium hydrogencarbonate solution (20 ml) and brine (20 ml), dried (MgSO<sub>4</sub>), filtered and concentrated *in vacuo* to give a pale yellow oil which was purified by flash column chromatography on silica gel (Biotage SNAP 25g) eluting with an increasing proportion of ethyl acetate/toluene from 3-25% to give ethyl-2-*O*-acetyl-3,4,6-tri-*O*-benzyl- $\alpha$ -D-mannopyranosyl-(1-3)-4,6-*O*-benzylidene-2-levulinoyl- $\beta$ -D-glucopyranosyl-(1-4)-3,6-di-*O*-benzyl-2-deoxy-2-*N*-phthalamido- $\beta$ -D-glucopyranosyl-(1-4)-3,6-di-*O*-benzyl-2-deoxy-2-*N*-phthalamido-1-thio- $\beta$ -D-

glucopyranoside **23** as a colourless oil (117 mg, 64%):  $[\alpha]_D^{18} +7.7$  (c=0.7, CHCl<sub>3</sub>), Lit.  $[\alpha]_D^{18}$  (c=1.0, CHCl<sub>3</sub>);  $\delta_H$  (500 MHz, CDCl<sub>3</sub>): 1.10 (3H, t, *J* 7.6, -SCH<sub>2</sub>CH<sub>3</sub>), 1.88 (3H, s, -CH<sub>3</sub>), 2.07 (3H, s, -C(O)CH<sub>3</sub>), 2.30 (1H, dt, *J* 18.3, 6.0, 9c-HH), 2.46-2.51 (2H, m, 8c-H<sub>2</sub>), 2.50 (1H, dq, *J* 12.6, 7.6, -SCHHCH<sub>3</sub>), 2.58 (1H, dq, *J* 12.6, 7.6, -SCHHCH<sub>3</sub>), 3.10 (1H, td, *J* 9.5, 4.9, 5c-H), 3.32-3.40 (3H, m, 5a-H, 6b-HH, 6c-HH), 3.47-3.54 (2H, m, 4a-H, 6b-HH), 3.62 (1H, t, *J* 9.3, 4c-H), 3.69-3.74 (1H, m, 5d-H), 3.72 (1H, br d, *J* 9.8, 6d-HH), 3.77 (1H, dd, *J* 9.8, 3.8, 6d-HH), 3.78-3.86 (4H, m, 3d-H, 4d-H, 6a-H<sub>2</sub>), 3.91 (1H, t, *J* 9.3, 3c-H), 4.13 (1H, t, *J* 9.2, 4b-H), 4.15-4.24 (5H, m, 2a-H, 2b-H, 3a-H, 5b-H, 6c-HH), 4.29 (1H, dd, *J* 10.5, 9.2, 3b-H), 4.39 (1H, d, *J* 12.7, -CHHPh), 4.40 (1H, d, *J* 11.3, -CHHPh), 4.41 (1H, d, *J* 12.3, -CHHPh), 4.43 (1H, d, *J* 12.0, -CHHPh), 4.46 (1H, d, *J* 11.3, -CHHPh), 4.51 (1H, d, *J* 11.3, -CHHPh), 4.52 (1H, d, *J* 11.3, -CHHPh), 4.53 (1H, d, *J* 11.4, -CHHPh), 4.62 (1H, d, *J* 12.0, -CHHPh), 4.63 (1H, d, *J* 8.5, 1c-H), 4.65 (1H, d, *J* 11.4, -CHHPh), 4.68 (1H, d, *J* 12.3, -CHHPh), 4.79 (1H, d, *J* 12.3, -CHHPh), 4.81 (1H, d, *J* 12.3, -CHHPh), 4.91 (1H, d, *J* 12.7, -CHHPh), 4.96 (1H, dd, *J* 9.3, 8.5, 2c-H), 5.08 (1H, d, *J* 9.1, 1a-H), 5.31 (1H, d, *J* 8.2, 1b-H), 5.37 (1H, br s, 1d-H), 5.42 (1H, s, 7c-H), 5.44 (1H, br s, 2d-H), 6.74-6.78 (3H, m, 3x ArH), 6.87-7.03 (7H, m, 7x ArH), 7.06-7.11 (2H, m, 2x ArH), 7.20-7.41 (23H, m, 23x ArH), 7.43-7.49 (4H, m, 4x ArH), 7.52-7.56 (1H, m, ArH), 7.61-7.78 (8H, m, 8x ArH), 7.83-7.88 (1H, m, ArH);  $\delta_C$  (125 MHz, CDCl<sub>3</sub>): 14.9 (-SCH<sub>2</sub>CH<sub>3</sub>), 21.0 (-OC(O)CH<sub>3</sub>), 23.7 (-SCH<sub>2</sub>CH<sub>3</sub>), 27.7 (C-8c), 29.5 (-C(O)CH<sub>3</sub>), 37.4 (C-9c), 54.8 (C-2a), 56.6 (C-2b), 65.4 (C-5c), 67.3 (C-6a), 68.0 (C-2d), 68.2 (C-6b), 68.4 (C-6c), 68.8 (C-6d), 71.7 (-CH<sub>2</sub>Ph), 71.8 (C-5d), 72.4 (C-2c), 72.6 (-CH<sub>2</sub>Ph), 73.2 (-CH<sub>2</sub>Ph), 73.5 (-CH<sub>2</sub>Ph), 73.8 (C-4d), 74.0 (C-3c), 74.6 (C-4a and 2x -CH<sub>2</sub>Ph), 75.0 (-CH<sub>2</sub>Ph), 75.9 (C-5b), 76.6 (C-3b), 77.9 (C-3a, 3d and 4b), 78.8 (C-5a), 80.7 (C-1a), 81.7 (C-4c), 97.0 (C-1b), 97.3 (C-1d), 100.4 (C-1c), 101.1 (C-7c), 123.1, 123.3, 123.6, 124.8, 126.1, 126.8, 127.0, 127.2, 127.3, 127.5, 127.6, 127.65, 127.69, 127.72, 127.76, 127.80, 127.86, 127.89, 127.93, 128.0, 128.1, 128.2, 128.3, 128.4, 128.5, 128.9, 129.3, 131.0, 131.4, 131.7, 131.8, 133.5, 133.7, 133.9, 136.8, 137.9, 138.0, 138.1, 138.4, 138.6, 138.7, 145.6, 167.5, 167.6, 167.7, 168.3, 170.1 (-OC(O)CH<sub>3</sub>), 171.3 (-OC(O)CH<sub>2</sub>-), 205.7 (-C(O)-); ESI<sup>+</sup> [C<sub>105</sub>H<sub>106</sub>N<sub>2</sub>NaO<sub>25</sub>S] requires 1849.6698, found 1849.6718.

**Ethyl-2-*O*-acetyl-3,4,6-tri-*O*-benzyl- $\alpha$ -D-mannopyranosyl-(1-3)-4,6-*O*-benzylidene- $\beta$ -D-glucopyranosyl-(1-4)-3,6-di-*O*-benzyl-2-deoxy-2-*N*-phthalamido- $\beta$ -D-glucopyranosyl-(1-4)-3,6-di-*O*-benzyl-2-deoxy-2-*N*-phthalamido-1-thio- $\beta$ -D-glucopyranoside**

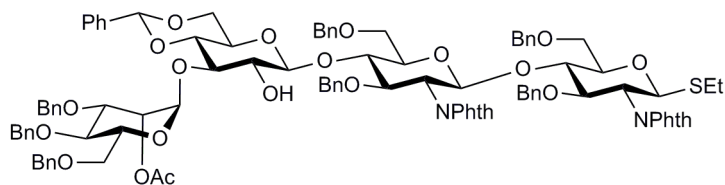

Hydrazine acetate (148 mg, 1.64 mmol) was added to a suspension of ethyl-2-*O*-acetyl-3,4,6-tri-*O*-benzyl- $\alpha$ -D-mannopyranosyl-(1-3)-4,6-*O*-benzylidene-2-levulinoyl- $\beta$ -D-glucopyranosyl-(1-4)-3,6-di-*O*-benzyl-2-deoxy-2-*N*-phthalamido- $\beta$ -D-glucopyranosyl-(1-4)-3,6-di-*O*-benzyl-2-deoxy-2-*N*-phthalamido-1-thio- $\beta$ -D-glucopyranoside **23** (1.00 g, 0.55 mmol) in methanol (40 ml). The mixture was heated to 55 °C under reflux for 20 h whereupon TLC analysis (40% EtOAc/petrol) indicated the complete consumption of the starting material ( $R_f=0.31$ ) and formation of a major product ( $R_f=0.35$ ). The mixture was diluted with water (150 ml) and DCM (150 ml). The layers were separated and the aqueous layer was extracted with DCM (3x 100ml). The combined organic layers were washed with water (100 ml) and brine (100 ml), dried ( $MgSO_4$ ), filtered and concentrated *in vacuo* to give a pale yellow foam which was purified by flash column chromatography on silica gel (Biotage SNAP 100g) eluting with an increasing proportion of ethyl acetate/petrol from 8-50% to give ethyl-2-*O*-acetyl-3,4,6-tri-*O*-benzyl- $\alpha$ -D-mannopyranosyl-(1-3)-4,6-*O*-benzylidene- $\beta$ -D-glucopyranosyl-(1-4)-3,6-di-*O*-benzyl-2-deoxy-2-*N*-phthalamido- $\beta$ -D-glucopyranosyl-(1-4)-3,6-di-*O*-benzyl-2-deoxy-2-*N*-phthalamido-1-thio- $\beta$ -D-glucopyranoside **3a** as a white powder (641 mg, 68%):  $[\alpha]_D^{18}$  ( $c=1.0$ ,  $CHCl_3$ ), Lit.  $[\alpha]_D^{18}$  ( $c=1.0$ ,  $CHCl_3$ );  $\delta_H$  (500 MHz,  $CDCl_3$ ): 1.11 (3H, t,  $J$  7.3,  $-SCH_2CH_3$ ), 2.52 (1H, dq,  $J$  12.6, 7.3,  $-SCHHCH_3$ ), 2.60 (1H, dq,  $J$  12.6, 7.3,  $-SCHHCH_3$ ), 3.13 (1H, td,  $J$  9.5, 5.0, 5c- $H$ ), 3.31-3.35 (2H, m, 5a- $H$ , 5b- $H$ ), 3.39-3.56 (4H, m, 2c- $H$ , 4c- $H$ , 6a- $HH$ , 6c- $HH$ ), 3.58 (1H, br d,  $J$  11.0, 6a- $HH$ ), 3.68 (1H, br d,  $J$  10.8, 6b- $HH$ ), 3.70 (1H, br d,  $J$  11.7, 6d- $HH$ ), 3.75 (1H, t,  $J$  9.1, 3c- $H$ ), 3.79 (1H, dd,  $J$  10.8, 4.4, 6d- $HH$ ), 3.86 (1H, br d,  $J$  11.3, 6b- $HH$ ), 3.91 (1H, t,  $J$  9.3, 4d- $H$ ), 4.02 (1H, dd,  $J$  9.3, 3.0, 3d- $H$ ), 4.11 (1H, dd,  $J$  10.2, 5.0, 6c- $HH$ ), 4.13 (1H, app t,  $J$  9.2, 4b- $H$ ), 4.16 (1H, app t,  $J$

9.2, 3a-*H*), 4.20-4.24 (3H, m, 2a-*H*, 2b-*H*, 5d-*H*), 4.25 (1H, dd, *J* 10.5, 9.2, 4a-*H*), 4.40 (1H, dd, *J* 10.5, 9.2, 3b-*H*), 4.41 (1H, d, *J* 12.6, -*CHHP*h), 4.48-4.53 (5H, m, 5x -*CHHP*h), 4.53 (1H, d, *J* 11.7, -*CHHP*h), 4.54 (1H, d, *J* 12.6, -*CHHP*h), 4.57 (1H, d, *J* 12.0, -*CHHP*h), 4.62 (1H, d, *J* 7.6, 1c-*H*), 4.70 (1H, d, *J* 12.0, -*CHHP*h), 4.71 (1H, d, *J* 11.0, -*CHHP*h), 4.81 (1H, d, *J* 12.3, -*CHHP*h), 4.86 (1H, d, *J* 12.3, -*CHHP*h), 4.87 (1H, d, *J* 11.0, -*CHHP*h), 5.08 (1H, d, *J* 10.1, 1a-*H*), 5.24 (1H, br s, 1d-*H*), 5.28 (1H, d, *J* 8.5, 1b-*H*), 5.45 (1H, s, 7c-*H*), 5.53 (1H, dd, *J* 3.0, 0.7, 2d-*H*), 6.73-6.81 (3H, m, 3x *ArH*), 6.87-7.06 (8H, m, 8x *ArH*), 7.15-7.44 (28H, m, 28x *ArH*), 7.52-7.57 (1H, m, *ArH*), 7.62-7.89 (8H, m, 8x *ArH*);  $\delta_c$  (125 MHz,  $\text{CDCl}_3$ ): 14.9 (- $\text{SCH}_2\text{CH}_3$ ), 21.0 (- $\text{OC(O)CH}_3$ ), 23.6 (- $\text{SCH}_2\text{CH}_3$ ), 54.7 (C-2a), 56.6 (C-2b), 65.9 (C-5c), 67.6 (C-6b), 68.3 (C-6a), 68.47 (C-6c), 68.53 (C-2d), 68.8 (C-6d), 71.5 (C-5d), 71.8 (- $\text{CH}_2\text{Ph}$ ), 72.6 (- $\text{CH}_2\text{Ph}$ ), 73.3 (- $\text{CH}_2\text{Ph}$ ), 73.4 (- $\text{CH}_2\text{Ph}$ ), 74.1 (C-2c), 74.3 (C-4d), 74.51 (C-5d or - $\text{CH}_2\text{Ph}$ ), 74.53 (C-5d or - $\text{CH}_2\text{Ph}$ ), 74.7 (- $\text{CH}_2\text{Ph}$ ), 75.1 (- $\text{CH}_2\text{Ph}$ ), 75.4 (C-4a), 77.5 (C-3a), 78.08 (C-3b), 78.12 (C-3d), 78.75 (C-4b), 78.78 (C-5a), 78.9 (C-3c), 80.7 (C-4c), 80.8 (C-1a), 96.9 (C-1b), 98.6 (C-1d), 100.9 (C-7c), 103.8 (C-1c), 123.2, 123.3, 123.7, 125.9, 126.9, 127.1, 127.23, 127.25, 127.4, 127.6, 127.65, 127.66, 127.76, 127.82, 127.9, 127.99, 128.01, 128.08, 128.10, 128.2, 128.29, 128.34, 128.5, 128.8, 131.4, 131.66, 131.74, 133.6, 133.7, 133.9, 134.0, 137.0, 137.6, 138.0, 138.1, 138.4, 138.45, 138.49, 167.5, 167.7, 168.5, 170.1 (- $\text{OC(O)CH}_3$ );  $\text{ESI}^+$  [ $\text{C}_{100}\text{H}_{100}\text{N}_2\text{NaO}_{23}\text{S}$ ] requires 1751.6330, found 1751.6310.

**Ethyl-2-*O*-acetyl-3,4,6-tri-*O*-benzyl- $\alpha$ -D-mannopyranosyl-(1-3)-2-*O*-acetyl-4,6-*O*-benzylidene- $\beta$ -D-mannopyranosyl-(1-4)-3,6-di-*O*-benzyl-2-deoxy-2-*N*-phthalamido- $\beta$ -D-glucopyranosyl-(1-4)-3,6-di-*O*-benzyl-2-deoxy-2-*N*-phthalamido-1-thio- $\beta$ -D-glucopyranoside**

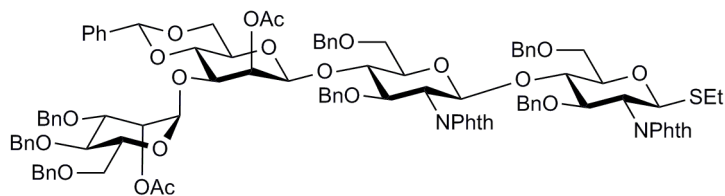

Triflic anhydride (838  $\mu$ l, 4.980 mmol) was added dropwise to a solution of ethyl-2-*O*-acetyl-3,4,6-tri-*O*-benzyl- $\alpha$ -D-mannopyranosyl-(1-3)-4,6-*O*-benzylidene- $\beta$ -D-glucopyranosyl-(1-4)-3,6-di-*O*-benzyl-2-deoxy-2-*N*-phthalamido- $\beta$ -D-glucopyranosyl-(1-4)-3,6-di-*O*-benzyl-2-deoxy-2-*N*-phthalamido-1-thio- $\beta$ -D-glucopyranoside **44** (575 mg, 0.332 mmol) in dry DCM (40 ml) at -5 °C under a nitrogen atmosphere. The resulting mixture was stirred for 3 h slowly warming to r.t. whereupon TLC analysis (15% EtOAc/petrol) indicated the complete consumption of the starting material ( $R_f$ =0.36) and formation of a single product ( $R_f$ =0.53). The reaction mixture was diluted with DCM (50 ml) and washed with saturated aqueous sodium hydrogencarbonate solution (2x 40 ml) and brine (40 ml), dried ( $MgSO_4$ ), filtered and concentrated *in vacuo* to give an orange oil which was purified by flash column chromatography on silica gel eluting with 35% ethyl acetate/petrol to give the intermediate triflate as a white solid (543 mg, 88%). The triflate (543 mg) and tetra-*n*-butylammonium acetate (751 mg, 2.49 mmol) were dissolved in dry toluene under a nitrogen atmosphere and sonicated at r.t. for 4h. The mixture was diluted with water (500 ml) and DCM (200 ml). The layers were separated and the aqueous layer was extracted with DCM (3x 150 ml). The combined organic extracts were washed with brine (150 ml), dried ( $MgSO_4$ ), filtered and concentrated *in vacuo* to give a yellow oil which was purified by flash column chromatography on silica gel (Biotage SNAP 25g) eluting with an increasing proportion of ethyl acetate/toluene from 10-80% to give ethyl-2-*O*-acetyl-3,4,6-tri-*O*-benzyl- $\alpha$ -D-mannopyranosyl-(1-3)-2-*O*-acetyl-4,6-*O*-benzylidene- $\beta$ -D-mannopyranosyl-(1-4)-3,6-di-*O*-benzyl-2-deoxy-2-*N*-phthalamido- $\beta$ -D-glucopyranosyl-(1-4)-3,6-di-*O*-benzyl-2-deoxy-2-*N*-phthalamido-1-thio- $\beta$ -D-glucopyranoside **24** (516 mg, 88%) as a pale yellow oil:  $[\alpha]_D^{18} +7.6$  ( $c=1.0$ ,

CHCl<sub>3</sub>), Lit.  $[\alpha]_D^{18}$  (c=1.0, CHCl<sub>3</sub>);  $\delta_H$  (400 MHz, CDCl<sub>3</sub>): 1.13 (3H, t, *J* 7.6, -SCH<sub>2</sub>CH<sub>3</sub>), 2.11 (3H, s, -OAc), 2.12 (3H, s, -OAc), 2.54 (1H, dq, *J* 12.5, 7.6, -SCHHCH<sub>3</sub>), 2.62 (1H, dq, *J* 12.5, 7.6, -SCHHCH<sub>3</sub>), 3.12 (1H, td, *J* 9.0, 4.6, 5c-*H*), 3.25 (1H, br d, *J* 9.6, 5b-*H*), 3.37 (1H, dd, *J* 9.6, 2.3, 5a-*H*), 3.45 (1H, dd, *J* 11.0, 3.5, 6a-*HH*), 3.54 (1H, d, *J* 10.4, 6c-*HH*), 3.60 (1H, d, *J* 11.0, 6a-*HH*), 3.61 (1H, d, *J* 11.1, 6b-*HH*), 3.68 (1H, d, *J* 11.1, 6b-*HH*), 3.73 (1H, d, *J* 10.6, 6d-*HH*), 3.83 (1H, dd, *J* 10.6, 3.6, 6d-*HH*), 3.86-3.98 (5H, m, 3c-*H*, 4c-*H*, 3d-*H*, 4d-*H* and 5d-*H*), 4.16-4.34 (7H, m, 2a-*H*, 3a-*H*, 4a-*H*, 2b-*H*, 3b-*H*, 4b-*H* and 6c-*HH*), 4.42-4.61 (9H, m, 9x -CHHPh), 4.69 (1H, d, *J* 12.1, -CHHPh), 4.71 (1H, d, *J* 12.1, -CHHPh), 4.76 (1H, br s, 1c-*H*), 4.89-4.92 (3H, m, 3x -CHHPh), 5.11 (1H, d, *J* 10.4, 1a-*H*), 5.27 (1H, br s, 1d-*H*), 5.30 (1H, d, *J* 8.1, 1b-*H*), 5.44 (1H, d, *J* 2.5, 2c-*H*), 5.51 (1H, br s, 2d-*H*), 5.53 (1H, s, 7c-*H*), 6.78-6.82 (3H, m, 3x Ar-*H*), 6.94-7.07 (7H, m, 7x Ar-*H*), 7.24-7.40 (28H, m, 28x Ar-*H*), 7.43-7.47 (2H, m, 2x Ar-*H*), 7.55-7.90 (8H, m, 8x Ar-*H*);  $\delta_C$  (100 MHz, CDCl<sub>3</sub>): 14.9 (-SCH<sub>2</sub>CH<sub>3</sub>), 20.9 (-OC(O)CH<sub>3</sub>), 21.0 (-OC(O)CH<sub>3</sub>), 23.7 (-SCH<sub>2</sub>CH<sub>3</sub>), 54.8 (C-2a), 56.6 (C-2b), 66.5 (C-5c), 67.6 (C-6b), 68.3 (C-6a and C-6c), 68.6 (C-2d), 68.9 (C-6d), 70.8 (C-2c), 71.7 (-CH<sub>2</sub>Ph), 72.8 (-CH<sub>2</sub>Ph), 73.1 (C-5d and -CH<sub>2</sub>Ph), 73.4 (2x -CH<sub>2</sub>Ph), 74.2 (-CH<sub>2</sub>Ph), 74.4, 74.5, 74.6 (-CH<sub>2</sub>Ph), 74.8 (-CH<sub>2</sub>Ph), 75.5 (C-4a), 76.9 (C-3b), 77.6 (C-3a), 77.7, 78.6 (C-4b), 78.8, 78.9 (C-5a), 80.8 (C-1a), 97.0 (C-1b), 98.6 (C-1d), 99.2 (C-1c), 101.2 (C-7c), 123.2, 123.3, 123.7, 126.9, 127.2, 127.5, 127.55, 127.58, 127.66, 127.72, 127.80, 127.84, 127.95, 128.0, 128.1, 128.26, 128.30, 128.4, 128.6, 128.9, 131.7, 133.6, 133.7, 133.9, 134.1, 137.1, 137.97, 138.02, 138.2, 138.3, 138.6, 138.7, 167.5, 167.7, 169.6 (-OC(O)CH<sub>3</sub>), 170.1 (-OC(O)CH<sub>3</sub>); ESI<sup>+</sup> [C<sub>102</sub>H<sub>102</sub>N<sub>2</sub>NaO<sub>24</sub>S] requires 1793.6435, found 1705.6353.

**Ethyl-2-*O*-acetyl-3,4,6-tri-*O*-benzyl- $\alpha$ -D-mannopyranosyl-(1-3)-2-*O*-acetyl- $\beta$ -D-mannopyranosyl-(1-4)-3,6-di-*O*-benzyl-2-deoxy-2-*N*-phthalamido- $\beta$ -D-glucopyranosyl-(1-4)-3,6-di-*O*-benzyl-2-deoxy-2-*N*-phthalamido-1-thio- $\beta$ -D-glucopyranoside**

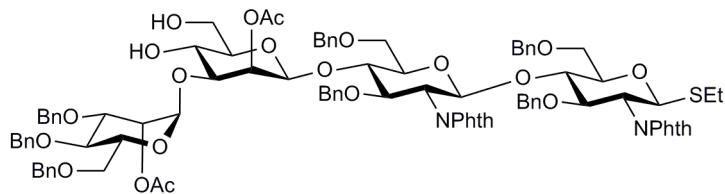

*p*-Toluenesulfonic acid monohydrate (68 mg, 0.36 mmol) was added to a solution of ethyl-2-*O*-acetyl-3,4,6-tri-*O*-benzyl- $\alpha$ -D-mannopyranosyl-(1-3)-2-*O*-acetyl-4,6-*O*-benzylidene- $\beta$ -D-mannopyranosyl-(1-4)-3,6-di-*O*-benzyl-2-deoxy-2-*N*-phthalamido- $\beta$ -D-glucopyranosyl-(1-4)-3,6-di-*O*-benzyl-2-deoxy-2-*N*-phthalamido-1-thio- $\beta$ -D-glucopyranoside **24** (6.35 g, 3.58 mmol) in dry methanol (128 ml) and dry 1,4-dioxane (72 ml) at r.t under a nitrogen atmosphere. The resulting solution was heated to 85 °C for 3.5 h whereupon TLC analysis (50% EtOAc/petrol) indicated the complete consumption of the starting material ( $R_f=0.68$ ) and formation of a single product ( $R_f=0.21$ ). The reaction mixture was diluted with DCM (400 ml) and saturated aqueous sodium hydrogencarbonate solution (300 ml). The layers were separated and the aqueous layer was extracted with DCM (3x 150 ml). The combined organic extracts were washed with saturated aqueous sodium hydrogencarbonate solution (150 ml) and brine (150 ml), dried ( $MgSO_4$ ), filtered and concentrated *in vacuo* to give a white solid which was purified by flash column chromatography on silica gel eluting with an increasing proportion of ethyl acetate/petrol from 50-80% to give ethyl-2-*O*-acetyl-3,4,6-tri-*O*-benzyl- $\alpha$ -D-mannopyranosyl-(1-3)-2-*O*-acetyl- $\beta$ -D-mannopyranosyl-(1-4)-3,6-di-*O*-benzyl-2-deoxy-2-*N*-phthalamido- $\beta$ -D-glucopyranosyl-(1-4)-3,6-di-*O*-benzyl-2-deoxy-2-*N*-phthalamido-1-thio- $\beta$ -D-glucopyranoside **25** (5.56 g, 92%) as a white solid:  $[\alpha]_D^{25} +19.6$  ( $c=1.0$ ,  $CHCl_3$ );  $\delta_H$  (500 MHz,  $CDCl_3$ ): 1.11 (3H, t,  $J$  7.6, - $SCH_2CH_3$ ), 2.06 (3H, s, -OAc), 2.15 (3H, s, -OAc), 2.52 (1H, dq,  $J$  12.6, 7.6, - $SCHHCH_3$ ), 2.60 (1H, dq,  $J$  12.6, 7.6, - $SCHHCH_3$ ), 3.03 (1H, ddd,  $J$  9.5, 4.7, 3.2, 5c-*H*), 3.23 (1H, br d,  $J$  9.6, 5b-*H*), 3.34 (1H, dd,  $J$  9.6, 3.8, 5a-*H*), 3.41 (1H, dd,  $J$  11.4, 3.8, 6a-*HH*), 3.27-3.59 (4H, m, 3d-*H*, 6a-*HH*, 6b-*HH*, 6c-*HH*), 3.63 (1H, br d,  $J$  11.0, 6b-*HH*), 3.68 (1H, dd,  $J$  11.7, 3.2, 6c-*HH*), 3.72-



3.75 (2H, m, 6d-*H*<sub>2</sub>), 3.80-3.86 (2H, m, 4c-*H*, 4d-*H*), 3.88 (1H, dd, *J* 9.3, 3.0, 3c-*H*), 3.97 (1H, dt, *J* 9.5, 3.5, 5d-*H*), 4.10 (1H, dd, *J* 9.6, 8.5, 4b-*H*), 4.16 (1H, dd, *J* 9.8, 8.2, 3a-*H*), 4.17-4.23 (3H, m, 2a-*H*, 2b-*H*, 4a-*H*), 4.25 (1H, dd, *J* 10.5, 8.5, 3b-*H*), 4.39 (1H, d, *J* 12.0, (-*CHHP*h)), 4.43 (1H, d, *J* 12.0, (-*CHHP*h)), 4.47-4.58 (7H, m, 7x -*CHHP*h), 4.65 (1H, d, *J* 11.7, (-*CHHP*h)), 4.65 (1H, br s, 1c-*H*), 4.67 (1H, d, *J* 11.7, (-*CHHP*h)), 4.86 (1H, d, *J* 11.3, (-*CHHP*h)), 4.87 (1H, d, *J* 12.7, (-*CHHP*h)), 4.88 (1H, d, *J* 11.3, (-*CHHP*h)), 5.07 (1H, d, *J* 10.1, 1a-*H*), 5.25 (1H, d, *J* 1.5, 1d-*H*), 5.26 (1H, d, *J* 8.2, 1b-*H*), 5.27 (1H, dd, *J* 2.3, 1.5, 2d-*H*), 5.34 (1H, d, *J* 3.5, 2c-*H*), 6.74-6.78 (3H, m, 3x *ArH*), 6.93-7.02 (7H, m, 7x *ArH*), 7.19-7.23 (2H, m, 2x *ArH*), 7.24-7.37 (23H, m, 23x *ArH*), 7.52-7.56 (1H, m, *ArH*), 7.60-7.79 (6H, m, 6x *ArH*), 7.84-7.91 (1H, m, *ArH*);  $\delta_C$  (125 MHz, CDCl<sub>3</sub>): 14.9 (-SCH<sub>2</sub>CH<sub>3</sub>), 21.0 (-C(O)CH<sub>3</sub>), 21.1 (-C(O)CH<sub>3</sub>), 23.6 (-SCH<sub>2</sub>CH<sub>3</sub>), 54.7 (C-2a), 56.5 (C-2b), 62.1 (C-6c), 67.0 (C-4c), 67.4 (C-6b), 68.3 (C-6a), 69.0 (C-6d), 69.3 (C-2d), 71.0 (C-2c), 71.76 (C-5d), 71.82 (-CH<sub>2</sub>Ph), 72.7 (-CH<sub>2</sub>Ph), 73.1 (-CH<sub>2</sub>Ph), 73.4 (-CH<sub>2</sub>Ph), 74.2 (C-4d), 74.37 (C-5b), 74.42 (-CH<sub>2</sub>Ph), 74.6 (-CH<sub>2</sub>Ph), 74.8 (-CH<sub>2</sub>Ph), 75.4 (C-5c), 75.6 (C-4a), 76.8 (C-3b), 77.4 (C-3c), 77.7 (C-3a), 78.0 (C-4b), 78.6 (C-3d), 78.8 (C-5a), 80.7 (C-1a), 97.0 (C-1b), 98.15 (C-1c or 1d), 98.21 (C-1c or 1d), 123.2, 123.3, 123.7, 126.9, 127.28, 127.34, 127.5, 127.6, 127.7, 127.8, 127.9, 128.0, 128.11, 128.14, 128.3, 128.35, 128.39, 128.6, 131.4, 131.65, 131.69, 133.5, 133.6, 133.9, 134.1, 137.8, 137.9, 138.3, 138.4, 138.5, 167.5, 167.6, 167.7, 168.4, 169.7 (-C(O)CH<sub>3</sub>), 170.6 (-C(O)CH<sub>3</sub>); ESI<sup>+</sup> [C<sub>95</sub>H<sub>98</sub>N<sub>2</sub>NaO<sub>24</sub>S] requires 1705.6122, found 1705.6059.

**Ethyl-2-*O*-acetyl-3,4,6-tri-*O*-benzyl- $\alpha$ -D-mannopyranosyl-(1-6)-[2-*O*-acetyl-3,4,6-tri-*O*-benzyl- $\alpha$ -D-mannopyranosyl-(1-3)]-2-*O*-acetyl- $\beta$ -D-mannopyranosyl-(1-4)-3,6-di-*O*-benzyl-2-deoxy-2-*N*-phthalamido- $\beta$ -D-glucopyranosyl-(1-4)-3,6-di-*O*-benzyl-2-deoxy-2-*N*-phthalamido-1-thio- $\beta$ -D-glucopyranoside**

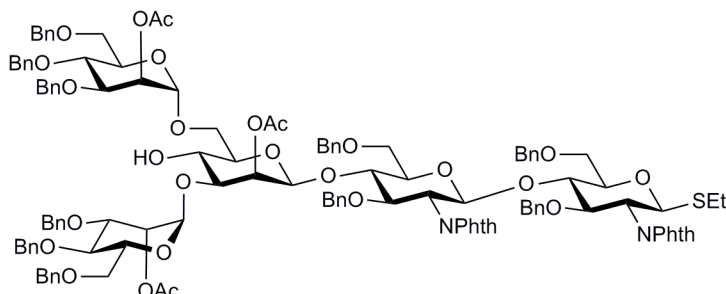

A mixture of ethyl-2-*O*-acetyl-3,4,6-tri-*O*-benzyl- $\alpha$ -D-mannopyranosyl-(1-3)-2-*O*-acetyl- $\beta$ -D-mannopyranosyl-(1-4)-3,6-di-*O*-benzyl-2-deoxy-2-*N*-phthalamido- $\beta$ -D-glucopyranosyl-(1-4)-3,6-di-*O*-benzyl-2-deoxy-2-*N*-phthalamido-1-thio- $\beta$ -D-glucopyranoside **25** (25 mg, 15  $\mu$ mol) and 2-*O*-acetyl-3,4,6-tri-*O*-benzyl- $\alpha$ -D-mannopyranosyl-1',1',1'-trichloroacetimidate **18** (10 mg, 16  $\mu$ mol) was concentrated from toluene (3x 2 ml) and dried under vacuum. The dried mixture was dissolved in dry DCM (1 ml) and added *via* cannula to a flask containing freshly activated 4Å molecular sieves (100 mg) at r.t. under a nitrogen atmosphere. The resulting suspension was stirred at r.t. for 30 min then cooled to -40 °C. Trimethylsilyltrifluoromethanesulfonate (0.2  $\mu$ l, 1.5 mmol) was added and the mixture was stirred at -40 °C for 20 min whereupon TLC analysis (33% EtOAc/toluene) indicated complete consumption of the acceptor **25** ( $R_f$ =0.07) and donor **18** ( $R_f$ =0.67), and the formation of a product ( $R_f$ =0.38). Triethylamine (100  $\mu$ l) was added and the mixture was warmed to r.t. and filtered through celite. The filtrate was concentrated *in vacuo* to give a colourless oil which was purified by flash column chromatography (Biotage SNAP 10g) on silica gel eluting with an increasing proportion of EtOAc/petrol from 10-75% to give ethyl-2-*O*-acetyl-3,4,6-tri-*O*-benzyl- $\alpha$ -D-mannopyranosyl-(1-6)-[2-*O*-acetyl-3,4,6-tri-*O*-benzyl- $\alpha$ -D-mannopyranosyl-(1-3)]-2-*O*-acetyl- $\beta$ -D-mannopyranosyl-(1-4)-3,6-di-*O*-benzyl-2-deoxy-2-*N*-phthalamido- $\beta$ -D-glucopyranosyl-(1-4)-3,6-di-*O*-benzyl-2-deoxy-2-*N*-phthalamido-1-thio- $\beta$ -D-glucopyranoside **44** (27 mg, 85%) as a white solid:  $[\alpha]_D^{18} +42.6$  ( $c=0.5$ ,  $\text{CHCl}_3$ ), Lit.  $[\alpha]_D^{18}$  ( $c=1.0$ ,  $\text{CHCl}_3$ );  $\delta_H$  (700 MHz,  $\text{CDCl}_3$ ): 1.11 (3H, t,  $J$  7.4, -

SCH<sub>2</sub>CH<sub>3</sub>), 1.95 (3H, s, -OAc), 2.08 (3H, s, -OAc), 2.14 (3H, s, -OAc), 2.51 (1H, dq, *J* 12.4, 7.4, -SCHHCH<sub>3</sub>), 2.59 (1H, dq, *J* 12.4, 7.4, -SCHHCH<sub>3</sub>), 3.06 (1H, dt, *J* 9.5, 2.9, 5c-*H*), 3.23 (1H, br d, *J* 9.9, 5b-*H*), 3.32 (1H, dd, *J* 9.9, 3.4, 5a-*H*), 3.37 (1H, dd, *J* 11.0, 3.4, 6a-*HH*), 3.53 (1H, br d, *J* 11.0, 6a-*HH*), 3.55 (1H, dd, *J* 11.2, 2.6, 6b-*HH*), 3.59 (1H, dd, *J* 9.6, 3.3, 3c-*H*), 3.62-3.65 (2H, m, 6b-*HH* and 6c-*HH*), 3.67-3.69 (2H, m, 6e-*H*<sub>2</sub>), 3.72-3.76 (2H, m, 5e-*H* and 6d-*HH*), 3.79-3.82 (3H, m, 3e-*H*, 4d-*H* and 6d-*HH*), 3.89-3.93 (3H, m, 3d-*H*, 4e-*H* and 6c-*HH*), 3.95 (1H, t, *J* 9.5, 4c-*H*), 3.98-4.01 (1H, m, 5d-*H*), 4.10-4.24 (7H, m, 2a-*H*, 3a-*H*, 4a-*H*, 2b-*H*, 3b-*H*, 4b-*H* and -CHHPh), 4.40-4.58 (12H, m, 12x -CHHPh), 4.65-4.68 (4H, m, 1c-*H* and 3x -CHHPh), 4.77 (1H, d, *J* 10.7, -CHHPh), 4.81 (1H, br s, 1e-*H*), 4.85-4.89 (3H, m, 3x -CHHPh), 5.06 (1H, d, *J* 10.4, 1a-*H*), 5.23 (1H, s, 1d-*H*), 5.24 (1H, d, *J* 8.3, 1b-*H*), 5.30 (1H, br s, 2e-*H*), 5.37 (1H, d, *J* 3.2, 2c-*H*), 5.43 (1H, br s, 2d-*H*), 6.74-6.81 (6H, m, 6x Ar-*H*), 6.95-6.99 (4H, m, 4x Ar-*H*), 7.09-7.12 (2H, m, 2x Ar-*H*), 7.14-7.17 (2H, m, 2x Ar-*H*), 7.22-7.36 (36H, m, 36x Ar-*H*), 7.54-7.82 (8H, m, 8x Ar-*H*); δ<sub>C</sub> (175 MHz, CDCl<sub>3</sub>): 14.9 (-SCH<sub>2</sub>CH<sub>3</sub>), 20.9 (-C(O)CH<sub>3</sub>), 21.0 (-C(O)CH<sub>3</sub>), 21.1 (-C(O)CH<sub>3</sub>), 23.7 (-SCH<sub>2</sub>CH<sub>3</sub>), 54.7 (C-2a), 56.6 (C-2b), 66.1 (C-6c), 67.0 (C-4c), 67.6 (C-6b), 68.3 (C-6a), 68.5 (C-2e), 68.7 (C-6e), 68.87 (C-6d), 68.93 (C-2d), 71.1 (-CH<sub>2</sub>Ph), 71.5 (-CH<sub>2</sub>Ph), 71.82 (C-4d), 71.85 (-CH<sub>2</sub>Ph), 71.9 (C-5d), 72.7 (-CH<sub>2</sub>Ph), 73.0 (-CH<sub>2</sub>Ph), 73.37 (-CH<sub>2</sub>Ph), 73.44 (-CH<sub>2</sub>Ph), 74.1 (C-4e), 74.3 (C-5e), 74.4 (C-5b), 74.50 (C-5c), 74.54 (2x -CH<sub>2</sub>Ph), 74.7 (-CH<sub>2</sub>Ph), 75.4 (-CH<sub>2</sub>Ph), 75.5 (C-3a), 76.9 (C-3b), 77.7 (C-4a), 77.8 (C-3d), 78.0 (C-3c), 78.2 (C-3e), 78.8 (C-4b and C-5a), 80.7 (C-1a), 96.9 (C-1b), 97.9 (C-1e), 99.1 (C-1c), 99.4 (C-1d), 123.1, 123.2, 123.3, 123.5, 126.8, 127.1, 127.4, 127.5, 127.60, 127.62, 127.65, 127.7, 127.76, 127.8, 127.9, 127.98, 128.02, 128.11, 128.14, 128.2, 128.3, 128.35, 128.4, 128.5, 131.4, 131.7, 131.8, 133.5, 133.58, 133.62, 133.8, 137.8, 137.9, 138.0, 138.1, 138.2, 138.3, 138.6, 138.65, 138.7, 167.5, 167.7, 168.2, 169.9 (-C(O)CH<sub>3</sub>), 170.0 (-C(O)CH<sub>3</sub>), 170.4 (-C(O)CH<sub>3</sub>); ESI<sup>+</sup> [C<sub>124</sub>H<sub>128</sub>N<sub>2</sub>NaO<sub>30</sub>S] requires 2180.8198, found 2180.8187.

**Phenyl-2-*O*-acetyl-3,4,6-tri-*O*-benzyl- $\alpha$ -D-mannopyranosyl-(1-6)-[2-*O*-acetyl-3,4,6-tri-*O*-benzyl- $\alpha$ -D-mannopyranosyl-(1-3)]-2,4-di-*O*-acetyl- $\beta$ -D-mannopyranosyl-(1-4)-3,6-di-*O*-benzyl-2-deoxy-2-*N*-phthalamido- $\beta$ -D-glucopyranosyl-(1-4)-3,6-di-*O*-benzyl-2-deoxy-2-*N*-phthalamido- $\beta$ -D-glucopyranoside**

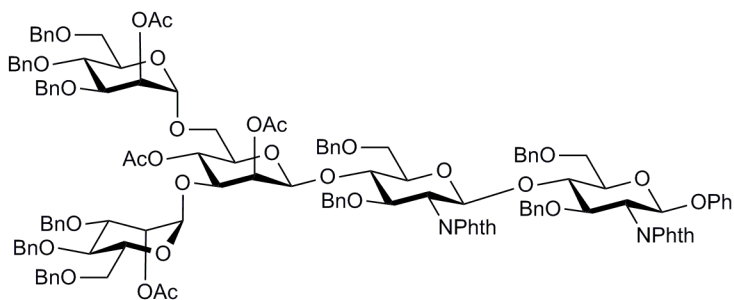

Acetic anhydride (30.0 ml, 317.4 mmol) was added dropwise to a solution of ethyl-2-*O*-acetyl-3,4,6-tri-*O*-benzyl- $\alpha$ -D-mannopyranosyl-(1-6)-[2-*O*-acetyl-3,4,6-tri-*O*-benzyl- $\alpha$ -D-mannopyranosyl-(1-3)]-2-*O*-acetyl- $\beta$ -D-mannopyranosyl-(1-4)-3,6-di-*O*-benzyl-2-deoxy-2-*N*-phthalamido- $\beta$ -D-glucopyranosyl-(1-4)-3,6-di-*O*-benzyl-2-deoxy-2-*N*-phthalamido-1-thio- $\beta$ -D-glucopyranoside **44** (2.53 g, 1.35 mmol) in dry pyridine (45 ml) at rt under an atmosphere of nitrogen. The mixture was stirred for 7h at rt whereupon TLC analysis (50% EtOAc/petrol) indicated the complete consumption of the starting material ( $R_f=0.36$ ) and formation of a single product ( $R_f=0.41$ ). The reaction mixture was concentrated *in vacuo*. The resulting oil was again concentrated *in vacuo* from methanol (2x 100 ml) then partitioned between DCM (150 ml) and saturated aqueous sodium hydrogencarbonate solution (100 ml). The layers were separated and the organic phase was washed with brine (100 ml), dried ( $MgSO_4$ ), filtered and concentrated *in vacuo* to give a white solid which was purified by flash column chromatography (Biotage SNAP 100g) on silica gel eluting with an increasing proportion of EtOAc/petrol from 11-75% to give a white solid (2.48 g) which was concentrated *in vacuo* from toluene (3x 75 ml) then dissolved in dry DCM (20 ml) and stirred over freshly activated 4Å molecular sieves (1.0 g) at r.t. under a nitrogen atmosphere for 1h. The mixture was cooled to -10 °C and NIS (511 mg, 2.27 mmol, dried by stirring over freshly activated 4Å molecular sieves) was added followed immediately by TMS-OTf (21  $\mu$ L, 0.11 mmol). The mixture was stirred at -10 °C for 15 min then phenol (252 mg, 2.68 mmol, concentrated *in vacuo*

from toluene (3x 10 ml) and stirred over freshly activated 4Å molecular sieves) in dry DCM (10 ml) was added. The reaction mixture was stirred for 2 h slowly warming to -5 °C then filtered through celite and diluted with DCM (150 ml) and 5% aqueous sodium thiosulfate solution (100 ml). The layers were separated and the aqueous phase was extracted with DCM (3x 80 ml). The combined organic extracts were washed with 5% aqueous sodium thiosulfate solution (100 ml) and brine (100 ml), dried (MgSO<sub>4</sub>), filtered and concentrated *in vacuo* to give a yellow oil which was purified by flash column chromatography (Biotage SNAP 100g) on silica gel eluting with an increasing proportion of EtOAc/petrol from 25-70% to give phenyl-2-*O*-acetyl-3,4,6-tri-*O*-benzyl- $\alpha$ -D-mannopyranosyl-(1-6)-[2-*O*-acetyl-3,4,6-tri-*O*-benzyl- $\alpha$ -D-mannopyranosyl-(1-3)]-2,4-di-*O*-acetyl- $\beta$ -D-mannopyranosyl-(1-4)-3,6-di-*O*-benzyl-2-deoxy-2-*N*-phthalamido- $\beta$ -D-glucopyranosyl-(1-4)-3,6-di-*O*-benzyl-2-deoxy-2-*N*-phthalamido- $\beta$ -D-glucopyranoside **27** (1.21 g, 48%) as a white solid;  $[\alpha]_D^{18}$  +31.7 (c=0.6, CHCl<sub>3</sub>), Lit.  $[\alpha]_D^{18}$  (c=1.0, CHCl<sub>3</sub>);  $\delta_H$  (500 MHz, CDCl<sub>3</sub>): 1.92 (3H, s, -OAc), 2.11 (3H, s, -OAc), 2.13 (3H, s, -OAc), 2.16 (3H, s, -OAc), 3.22-3.28 (2H, m, 5b-*H*, 5c-*H*), 3.39 (1H, dd, *J* 10.7, 4.4, 6c-*HH*), 3.44 (1H, app dd, *J* 8.6, 4.3, 5a-*H*), 3.51-3.59 (3H, m, 6c-*HH*, 6-*H*, 6-*H*), 3.62-3.68 (4H, m, 3c-*H*, 6-*H*, 6-*H*, 6-*H*), 3.70-3.74 (2H, m, 5e-*H*, 6-*H*), 3.76 (1H, dd, *J* 10.7, 4.1, 6-*H*), 3.81-3.87 (3H, m, 3d-*H*, 4e-*H*, 6-*H*), 3.91 (1H, dd, *J* 9.3, 3.0, 3e-*H*), 3.93-3.99 (2H, m, 4d-*H*, 5d-*H*), 4.12-4.25 (5H, m, 2b-*H*, 3a-*H*, 3b-*H*, 4a-*H*, 4b-*H*), 4.37-4.74 (16H, m, 16x PhCH-), 4.39-4.42 (1H, m, 2a-*H*), 4.79-4.88 (4H, m, 4x PhCH-), 4.82 (1H, d, *J* 2.8, 1e-*H*), 4.94 (1H, d, *J* 1.9, 1d-*H*), 5.13 (1H, dd, *J* 3.2, 1.9, 2d-*H*), 5.22 (1H, app t, *J* 9.5, 4c-*H*), 5.23 (1H, d, *J* 7.6, 1b-*H*), 5.31 (1H, dd, *J* 3.0, 1.9, 2e-*H*), 5.40 (1H, d, *J* 3.2, 2c-*H*), 5.57 (1H, d, *J* 8.5, 1a-*H*), 6.72-6.82 (7H, m, 7x Ar*H*), 6.87-6.99 (5H, m, 5x Ar*H*), 7.05-7.40 (44H, m, 44x Ar*H*), 7.56-7.82 (7H, m, 7x Ar*H*);  $\delta_C$  (125 MHz, CDCl<sub>3</sub>): 20.78 (-CH<sub>3</sub>), 20.83 (-CH<sub>3</sub>), 21.0 (-CH<sub>3</sub>), 21.1 (-CH<sub>3</sub>), 55.5 (C-2a), 56.5 (C-2b), 66.7 (C-6), 67.5 (C-6), 68.0 (C-6c), 68.4 (C-2e), 68.66 (C-4c), 68.68 (C-6), 68.8 (C-6), 69.2 (C-2d), 70.8 (C-2c) 71.70 (C-5a), 71.74 (-CH<sub>2</sub>Ph), 71.78 (-CH<sub>2</sub>Ph), 72.1 (C-5d), 72.68 (C-5c), 72.73 (-CH<sub>2</sub>Ph), 73.0 (-CH<sub>2</sub>Ph), 73.4 (2x -CH<sub>2</sub>Ph), 73.9 (C-4d), 74.1 (C-4e), 74.42 (C-5b), 74.43 (-CH<sub>2</sub>Ph), 74.5 (-CH<sub>2</sub>Ph), 74.6 (-CH<sub>2</sub>Ph), 74.7 (C-5a), 75.0 (-CH<sub>2</sub>Ph), 75.8 (C-3a, 3b or 4a), 76.3 (C-3a, 3b or 4a), 76.6 (C-3a, 3b or 4a), 77.4 (C-3c), 78.2 (C-3e),

79.0 (C-4b), 96.2 (C-1a), 97.1 (C-1b), 97.9 (C-1e), 98.8 (C-1c), 100.0 (C-1d), 116.9, 122.6, 123.1, 123.2, 123.5, 126.9, 127.2, 127.37, 127.40, 127.45, 127.49, 127.54, 127.62, 127.67, 127.73, 127.79, 128.0, 128.15, 128.18, 128.20, 128.23, 128.26, 128.35, 128.36, 128.6, 129.2, 131.4, 131.6, 131.8, 133.6, 133.8, 137.9, 138.00, 138.03, 138.1, 138, 2, 138.3, 138.4, 138.5, 138.6, 156.8, 167.4, 168.1, 169.7, 170.0, 170.1, 170.5; ESI<sup>+</sup> [C<sub>130</sub>H<sub>130</sub>N<sub>2</sub>Na<sub>2</sub>O<sub>32</sub>] requires 1138.4196, found 1138.4222.

**Phenyl-2-*O*-acetyl-3,4,6-tri-*O*-benzyl- $\alpha$ -D-mannopyranosyl-(1-6)-[2-*O*-acetyl-3,4,6-tri-*O*-benzyl- $\alpha$ -D-mannopyranosyl-(1-3)]-2,4-di-*O*-acetyl- $\beta$ -D-mannopyranosyl-(1-4)-3,6-di-*O*-benzyl-2-deoxy-2-*N*-acetyl- $\beta$ -D-glucopyranosyl-(1-4)-3,6-di-*O*-benzyl-2-deoxy-2-*N*-acetyl- $\beta$ -D-glucopyranoside**

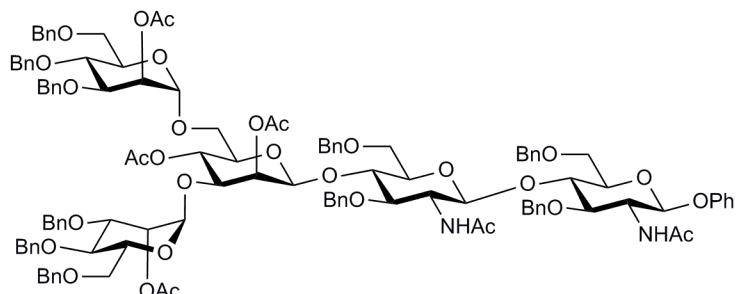

Methanol (25 ml) was added to a solution of phenyl-2-*O*-acetyl-3,4,6-tri-*O*-benzyl- $\alpha$ -D-mannopyranosyl-(1-6)-[2-*O*-acetyl-3,4,6-tri-*O*-benzyl- $\alpha$ -D-mannopyranosyl-(1-3)]-2,4-di-*O*-acetyl- $\beta$ -D-mannopyranosyl-(1-4)-3,6-di-*O*-benzyl-2-deoxy-2-*N*-phthalamido- $\beta$ -D-glucopyranosyl-(1-4)-3,6-di-*O*-benzyl-2-deoxy-2-*N*-phthalamido- $\beta$ -D-glucopyranoside **27** (1.14 g, 0.51 mmol) in 1,2-ethylenediamine (5.11 ml, 76.50 mmol) at r.t under a nitrogen atmosphere. The mixture was heated to reflux and stirred for 6 h then concentrated *in vacuo* from toluene (3x 40 ml). The resulting yellow oil was dissolved in dry pyridine (24 ml) and acetic anhydride (16 ml) at r.t under a nitrogen atmosphere. The mixture was stirred for 16 h whereupon TLC analysis (75% EtOAc/petrol) indicated the formation of a single product (R<sub>f</sub>=0.57). The reaction mixture was concentrated *in vacuo*. The resulting oil was again concentrated *in vacuo* from methanol (2x 150 ml) then partitioned between EtOAc (100 ml) and water (100 ml). The layers were separated and the aqueous layer was extracted with EtOAc (4x 75 ml). The combined organic extracts were washed with brine (150 ml), dried (MgSO<sub>4</sub>), filtered and concentrated *in vacuo* to give a pale yellow solid which was purified by flash column chromatography on silica gel eluting with 60% ethyl acetate/petrol to give phenyl-2-*O*-acetyl-3,4,6-tri-*O*-benzyl- $\alpha$ -D-mannopyranosyl-(1-6)-[2-*O*-acetyl-3,4,6-tri-*O*-benzyl- $\alpha$ -D-mannopyranosyl-(1-3)]-2,4-di-*O*-acetyl- $\beta$ -D-mannopyranosyl-(1-4)-3,6-di-*O*-benzyl-2-deoxy-2-*N*-acetyl- $\beta$ -D-glucopyranosyl-(1-4)-3,6-di-*O*-benzyl-2-deoxy-2-*N*-acetyl- $\beta$ -D-glucopyranoside **45** (838 mg, 80%) as a colourless oil: [ $\alpha$ ]<sub>D</sub><sup>18</sup> +26.5 (c=0.5, CHCl<sub>3</sub>), Lit. [ $\alpha$ ]<sub>D</sub><sup>18</sup> (c=1.0, CHCl<sub>3</sub>);  $\delta_{\text{H}}$  (500 MHz, CDCl<sub>3</sub>): 1.58 (3H, s, -CH<sub>3</sub>), 1.91 (3H, s, -CH<sub>3</sub>), 2.03 (3H, s, -

*CH*<sub>3</sub>), 2.05 (3H, s, -*CH*<sub>3</sub>), 2.13 (3H, s, -*CH*<sub>3</sub>), 2.15 (3H, s, -*CH*<sub>3</sub>), 3.20-3.27 (2H, m, 5b-*H*, 5c-*H*), 3.44-3.53 (3H, m, 3b-*H*, 6c-*HH*, 6-*H*), 3.53-3.71 (8H, m, 2b-*H*, 3c-*H*, 6a-*HH*, 6b-*H*<sub>2</sub>, 6c-*HH*, 2x 6-*H*), 3.73-3.95 (10H, m, 3a-*H*, 3d-*H*, 3e-*H* 4d-*H*, 4e-*H*, 5a-*H*, 5d-*H*, 5e-*H*, 6a-*HH*, 6-*H*), 3.96-3.99 (1H, m, 4a-*H*), 4.04 (1H, app t, *J* 8.8, 4b-*H*), 4.30 (1H, d, *J* 8.2, 1b-*H*), 4.33 (2H, s, Ph*CH*<sub>2</sub>-), 4.37 (1H, d, *J* 11.0, Ph*CHH*-), 4.38 (1H, d, *J* 12.0, Ph*CHH*-), 4.41-4.45 (1H, m, 2a-*H*), 4.43 (1H, d, *J* 12.0, Ph*CHH*-), 4.45-4.63 (9H, m, 9x Ph*CHH*-), 4.59 (1H, br s, 1c-*H*), 4.63 (1H, d, *J* 12.3, Ph*CHH*-), 4.66 (1H, d, *J* 12.3, Ph*CHH*-), 4.67 (1H, d, *J* 8.2, -*NHAc*), 4.78 (1H, d, *J* 12.0, Ph*CHH*-), 4.81 (1H, d, *J* 12.0, Ph*CHH*-), 4.82 (1H, d, *J* 11.0, Ph*CHH*-), 4.85 (1H, d, *J* 11.4, Ph*CHH*-), 4.86 (1H, br s, 1e-*H*), 4.92 (1H, d, *J* 1.7, 1d-*H*), 5.11 (1H, dd, *J* 2.8, 1.7, 2d-*H*), 5.17 (1H, app t, *J* 9.9, 4c-*H*), 5.23 (1H, d, *J* 4.1, 1a-*H*), 5.33 (1H, d, *J* 3.1, 2c-*H*), 5.34 (1H, dd, *J* 2.8, 1.9, 2e-*H*), 6.75 (1H, d, *J* 9.5, -*NHAc*), 6.94-7.00 (3H, m, 3x Ar*H*), 7.14-7.20 (6H, m, 6x Ar*H*), 7.21-7.37 (46H, m, 46x Ar*H*);  $\delta_C$  (125 MHz, CDCl<sub>3</sub>): 20.8 (-OC(O)CH<sub>3</sub>), 20.9 (-OC(O)CH<sub>3</sub>), 21.0 (-OC(O)CH<sub>3</sub>), 21.1 (-OC(O)CH<sub>3</sub>), 23.0 (-NHC(O)CH<sub>3</sub>), 23.4 (-NHC(O)CH<sub>3</sub>), 49.1 (C-2a), 55.0 (C-2b), 66.4 (C-6c), 68.3 (C-6b), 68.4 (C-4c), 68.6 (C-2e, 6e or 6d), 68.69 (C-2e, 6e or 6d), 68.71 (C-2e, 6e or 6d), 69.0 (C-2d), 70.1 (C-6a), 71.6 (C-5e), 71.7 (-CH<sub>2</sub>Ph), 71.86 (-CH<sub>2</sub>Ph), 71.90 (-CH<sub>2</sub>Ph), 72.1 (C-5d), 72.8 (C-5c), 73.0 (C-4a), 73.32 (2x -CH<sub>2</sub>Ph), 73.35 (-CH<sub>2</sub>Ph), 73.36 (-CH<sub>2</sub>Ph), 73.7 (-CH<sub>2</sub>Ph), 73.8 (C-4e), 74.3 (C-4d), 74.4 (C-5b), 74.6 (-CH<sub>2</sub>Ph), 74.8 (C-5a), 75.2 (-CH<sub>2</sub>Ph), 76.4 (C-3a), 76.8 (C-4b), 77.3 (C-3c and 3d), 77.7 (C-3b), 78.4 (C-3e), 97.75 (C-1a and 1e), 98.0 (C-1c), 99.9 (C-1d), 100.0 (C-1b), 116.4, 122.0, 127.4, 127.5, 127.57, 127.59, 127.65, 127.68, 127.71, 127.80, 127.86, 127.91, 127.92, 128.00, 128.04, 128.08, 128.19, 128.26, 128.27, 128.32, 128.37, 128.59, 128.64, 128.9, 129.3, 137.76, 137.78, 137.9, 138.1, 138.2, 138.3, 138.4, 138.55, 138.63, 157.1, 169.8 (-C(O)CH<sub>3</sub>), 170.0 (-C(O)CH<sub>3</sub>), 170.33 (-C(O)CH<sub>3</sub>), 170.35 (-C(O)CH<sub>3</sub>), 170.5 (-C(O)CH<sub>3</sub>), 170.7 (-C(O)CH<sub>3</sub>); ESI<sup>+</sup> [C<sub>118</sub>H<sub>130</sub>N<sub>2</sub>NaO<sub>30</sub>] requires 2077.8601, found 2077.8651.



**Phenyl- $\alpha$ -D-mannopyranosyl-(1-6)-[ $\alpha$ -D-mannopyranosyl-(1-3)]- $\beta$ -D-mannopyranosyl-(1-4)-2-deoxy-2-*N*-acetyl- $\beta$ -D-glucopyranosyl-(1-4)-2-deoxy-2-*N*-acetyl- $\beta$ -D-glucopyranoside**

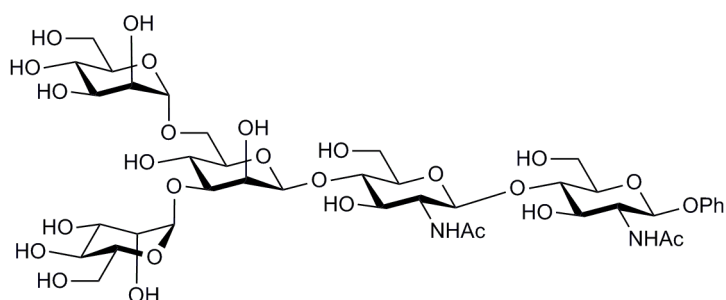

A mixture of Pd(OH)<sub>2</sub> on carbon (20% w/w, 400 mg, 0.376 mmol) and phenyl-2-*O*-acetyl-3,4,6-tri-*O*-benzyl- $\alpha$ -D-mannopyranosyl-(1-6)-[2-*O*-acetyl-3,4,6-tri-*O*-benzyl- $\alpha$ -D-mannopyranosyl-(1-3)]-2,4-di-*O*-acetyl- $\beta$ -D-mannopyranosyl-(1-4)-3,6-di-*O*-benzyl-2-deoxy-2-*N*-acetyl- $\beta$ -D-glucopyranosyl-(1-4)-3,6-di-*O*-benzyl-2-deoxy-2-*N*-acetyl- $\beta$ -D-glucopyranoside **46** (650 mg, 0.316 mmol) was suspended in dry methanol (50 ml) at r.t under a nitrogen atmosphere. The flask was evacuated and purged with hydrogen twice. A balloon of hydrogen was attached and the mixture was stirred at r.t for 64 h whereupon MS analysis indicated complete conversion. The reaction vessel was purged with nitrogen and the reaction mixture was filtered through a short celite pad under a constant stream of nitrogen. The resulting solution was concentrated *in vacuo* to give a white solid which was purified by column chromatography on silica gel eluting with 25% methanol/DCM to give a white solid (331 mg) which was dissolved in dry MeOH (50 ml) at rt under an atmosphere of nitrogen. Sodium methoxide (4.37 M solution in MeOH, 17  $\mu$ L, 0.074 mmol) was added and the reaction mixture was stirred at rt for 8h whereupon MS analysis indicated complete reaction. Activated Dowex-H<sup>+</sup> resin (2.0 g) was added and the mixture stirred at rt for 30 min then filtered and concentrated *in vacuo* to give phenyl- $\alpha$ -D-mannopyranosyl-(1-6)-[ $\alpha$ -D-mannopyranosyl-(1-3)]- $\beta$ -D-mannopyranosyl-(1-4)-2-deoxy-2-*N*-acetyl- $\beta$ -D-glucopyranosyl-(1-4)-2-deoxy-2-*N*-acetyl- $\beta$ -D-glucopyranoside **4** (258 mg, 88%) as a white solid: [ $\alpha$ ]<sub>D</sub><sup>18</sup> -12.9 (c=0.1, H<sub>2</sub>O);  $\delta$ <sub>H</sub> (700 MHz, D<sub>2</sub>O): 1.94 (3H, s, -

NHC(O)CH<sub>3</sub>), 2.01 (3H, s, -NHC(O)CH<sub>3</sub>), 3.54-3.62 (7H, m, 3d-H, 3e-H, 5a-H, 5b-H, 5c-H, 5d-H, 6a-HH), 3.62-3.70 (8H, m, 3a-H, 3c-H, 4a-H, 4b-H, 4c-H, 6a-HH, 2x 6-H), 3.70-3.75 (4H, m, 2b-H, 3b-H, 5d-H, 6c-HH), 3.78-3.86 (7H, m, 4d-H, 4e-H, 6c-HH, 6-H<sub>2</sub>, 2x 6-H), 3.89 (1H, dd, *J* 3.4, 1.4, 2e-H), 3.93 (1H, dd, *J* 10.5, 8.5, 2a-H), 3.99 (1H, dd, *J* 3.2, 1.5, 2d-H), 4.18 (1H, d, *J* 2.0, 2c-H), 4.55 (1H, d, *J* 8.2, 1b-H), 4.70 (1H, br s, 1c-H), 4.84 (1H, d, *J* 1.4, 1e-H), 5.02 (1H, d, *J* 1.5, 1d-H), 5.07 (1H, d, *J* 8.5, 1a-H), 6.98 (2H, d, *J* 8.2, 2x Ar-H<sub>ortho</sub>), 7.07 (1H, t, *J* 7.2, Ar-H<sub>para</sub>), 7.30 (2H, dd, *J* 8.2, 7.2, 2x Ar-H<sub>meta</sub>); δ<sub>C</sub> (175 MHz, D<sub>2</sub>O): 22.1 (-NHC(O)CH<sub>3</sub>), 22.2 (-NHC(O)CH<sub>3</sub>), 54.87 (C-2b), 54.92 (C-2a), 59.9 (C-6), 60.0 (C-6a), 60.9 (C-6), 61.1 (C-6), 65.8 (C-4c and 6c), 66.8 (C-3e or 3d), 66.9 (C-3e or 3d), 69.9 (C-2e), 70.0 (C-2d), 70.1 (C-2c), 70.3 (C-4d or 4e), 70.4 (C-4d or 4e), 71.9 (C-3a), 72.1 (C-3b), 72.7 (C-5e), 73.4 (C-5d), 74.2 (C-5c), 74.4 (C-5b), 74.7 (C-5a), 79.0 (C-4a), 79.6 (C-4b), 80.5 (C-3c), 99.4 (C-1a), 99.6 (C-1e), 100.4 (C-1c), 101.4 (C-1b), 102.5 (C-1d), 116.6 (C-ortho), 123.5 (C-para), 130.0 (C-meta), 156.6 (C-*ipso*), 174.7 (-C(O)CH<sub>3</sub>), 174.9 (-C(O)CH<sub>3</sub>); ESI<sup>+</sup> [C<sub>40</sub>H<sub>62</sub>N<sub>2</sub>NaO<sub>26</sub>] requires 1009.3483, found 1009.3456.

## References

- [1] Halgren, T. A. *J. Comput. Chem.* **1999**, *20*, 730.
- [2] Parish, C.; Lombardi, R.; Sinclair, K.; Smith, E.; Goldberg, A.; Rappleye, M.; Dure, M. *J. Molec. Graphics & Modelling* **2002**, *21*, 129.
- [3] a) Kolossvary, I.; Guida, W.C. *J. Comp. Chem.* **1999**, *20*, 1671;  
b) Kolossvary, I.; Guida, W.C. *J. Am. Chem. Soc.* **1996**, *118*, 5011.
- [4] Chang, G.; Guida, W.C.; Still, W.C. *J. Am. Chem. Soc.* **1989**, *111*, 4379.
- [5] Mohamadi, F.; Richards, N. G. J.; Guida, W. C.; Liskamp, R.; Lipton, M.; Caufield, C.; Chang, G.; Hendrickson, T.; Still, W.C. *J. Comp Chem.* **1990**, *11*, 440.
- [6] Gaussian 09, Revision **A.1**, Frisch, M. J.; Trucks, G. W.; Schlegel, H. B.; Scuseria, G. E.; Robb, M. A.; Cheeseman, J. R.; Scalmani, G.; Barone, V.; Mennucci, B.; Petersson, G. A.; Nakatsuji, H.; Caricato, M.; Li, X.; Hratchian, H. P.; Izmaylov, A. F.; Bloino, J.; Zheng, G.; Sonnenberg, J. L.; Hada, M.; Ehara, M.; Toyota, K.; Fukuda, R.; Hasegawa, J.; Ishida, M.; Nakajima, T.; Honda, Y.; Kitao, O.; Nakai, H.; Vreven, T.; Montgomery, Jr., J. A.; Peralta, J. E.; Ogliaro, F.; Bearpark, M.; Heyd, J. J.; Brothers, E.; Kudin, K. N.; Staroverov, V. N.; Kobayashi, R.; Normand, J.; Raghavachari, K.; Rendell, A.; Burant, J. C.; Iyengar, S. S.; Tomasi, J.; Cossi, M.; Rega, N.; Millam, J. M.; Klene, M.; Knox, J. E.; Cross, J. B.; Bakken, V.; Adamo, C.; Jaramillo, J.; Gomperts, R.; Stratmann, R. E.; Yazyev, O.; Austin, A. J.; Cammi, R.; Pomelli, C.; Ochterski, J. W.; Martin, R. L.; Morokuma, K.; Zakrzewski, V. G.; Voth, G. A.; Salvador, P.; Dannenberg, J. J.; Dapprich, S.; Daniels, A. D.; Farkas, Ö.; Foresman, J. B.; Ortiz, J. V.; Cioslowski, J.; Fox, D. J. Gaussian, Inc., Wallingford CT, 2009.
- [7] Kaminski, G. A.; Friesner, R. A.; Tirado-Rives, J.; Jorgensen, W. J. *J. Phys. Chem. B* **2001**, *105*, 6474.
- [8] Kirschner, K.N.; Yongye, A.B.; Tschampel, S.M.; González-Outeiriño, J.; Daniels, C.R.; Foley, B.L.; Woods, R.J. *J. Comput Chem* **2008**, *29*, 622.
- [9] Stortz, C.A.; Johnson, G.P.; French, A.D.; and Csonka, G.I. *Carbohydr. Res.* **2009**, *344*, 2217.
- [10] Still, W.C.; Galynker, I. *Tetrahedron* **1981**, *37*, 3981.
- [11] Ponder, J.W.; Richards, F. M. *J. Comp. Chem.* **1987**, *8*, 1016.
- [12] a) Qiu, D.; Shenkin, P. S.; Hollinger, F. P.; Still, W. C. *J. Phys. Chem. A* **1997**, *101*, 3005; b) Still, W. C.; Tempczyk, A.; Hawley, R. C.; Hendrickson, T. *J. Am. Chem. Soc.* **1990**, *112*, 6127; c) Weiser, J.; Shenkin, P. S.; Still, W. C.; *J. Comp. Chem.* **1999**, *20*, 688; d) Weiser, J.; Shenkin, P. S.; Still, W. C. *J. Comp. Chem.* **1999**, *20*, 586; e) Weiser, J.; Weiser, A. A.; Shenkin, P. S.; Still, W. C. *J. Comp. Chem.* **1998**, *19*, 797.
- [13] Stanca-Kaposta, E. C.; Gamblin, D. P.; Cocinero E. J.; Frey, J.; Kroemer, R. T.; Fairbanks, A. J.; Davis, B. G.; Simons, J. P. *J. Am. Chem. Soc.* **2008**, *130*, 10691.
- [14] Rising, T. W. D. F.; Claridge, T. D. W.; Davies, N.; Gamblin, D. P.; Moir, J. W. B.; Fairbanks, A. J. *Carbohydr. Res.* **2006**, *341*, 1574.
- [15] Cocinero, E. J.; Stanca-Kaposta, E. C.; Dethlefsen, M.; Liu, B.; Gamblin, D. P.; Davis, B. G.; Simons, J. P. *Chem. Eur. J.* **2009**, *15*, 13427.
- [16] Li, Y. M.; Zhou, Y.; Ma, Y. F.; Li, X. B. *Carbohydr. Res.* **2011**, *346*, 1714.

- [17] Nagorny, P.; Fasching, B.; Li, X. C.; Chen, G.; Aussedat, B.; Danishefsky, S. *J. J. Am. Chem. Soc.* **2009**, *131*, 5792.
- [18] Lonn, H. *Carbohydr. Res.* **1985**, *139*, 105.
- [19] Sarkar, K.; Mukherjee, I.; Roy, N.J. *Carbohydr. Chem.* **2003**, *22*, 95.
- [20] Witte, M. D. Horst, D.; Wiertz, E. J. H. J.; van der Marel, G. A.; Overkleeft, H. S. *J. Org. Chem.* **2009**, *74*, 605.
- [21] W. M. Macindoe, W.M.; Nakahara, Y.; Ogawa, T. *Carbohydr. Res.* **1995**, *271*, 207.
- [22] Houdier, S.; Vottero, P. J. A. *Carbohydr. Res.* **1993**, *248*, 377.
- [23] Mukhopadhyay, B.; Kartha, K. P. R.; Russell, D. A.; Field, R. A. *J. Org. Chem.* **2004**, *69*, 7758.
- [24] Soderberg, E.; Westman, J.; Oscarson, S. *J. Carbohydr. Chem.* **2001**, *20*, 397.
- [25] Li, Z. J.; Li, H.; Cai, M. S. *Carbohydr. Res.* **1999**, *320*, 1.
- [26] Dais, P.; Shing, T. K. M.; Perlin, A. S. *Carbohydr. Res.* **1983**, *122*, 305.
- [27] Tsui, D. S.; Gorin, P. A. J. *Carbohydr. Res.* **1986**, *156*, 1.
- [28] Zhang, Y. M.; Mallet, J. M.; Sinay, P. *Carbohydr. Res.* **1992**, *236*, 73.
- [29] Beignet, J.; Tiernan, J.; Woo, C. H.; Kariuki, B. M.; Cox, L. R. *J. Org. Chem.* **2004**, *69*, 9323.
- [30] Ogawa, T.; Sasajima, K. *Carbohydr. Res.* **1981**, *93*, 53.
- [31] Yamazaki, Y.; Sato, S.; Nukada, T.; Ito, Y.; Ogawa, T. *Carbohydr. Res.* **1990**, *201*, 31.

## **NMR Spectra**

28

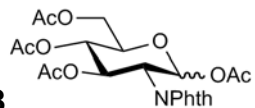

# NMR@CHEM.OX

```

NAME      Mar30-2010-38
EXPNO     1
PROCNO    1
Date_     20100330
Time      14.18
INSTRUM   av400
PROBHD    5 mm QNP 1H/13
PULPROG   zg60
TD        65536
SOLVENT   CDC13
NS        16
DS        2
SWH       8278.146 Hz
FIDRES    0.126314 Hz
AQ        3.9584243 sec
RG        90.5
DW        60.400 usec
DE        7.50 usec
TE        300.0 K
D1        1.00000000 sec
  
```

```

===== CHANNEL f1 =====
NUC1      1H
P1        9.00 usec
PL1       0.00 dB
SFO1     400.2024714 MHz
SI        32768
SF        400.2000028 MHz
WDW       EM
SSB       0
LB        0.30 Hz
GB        0
PC        1.00
  
```

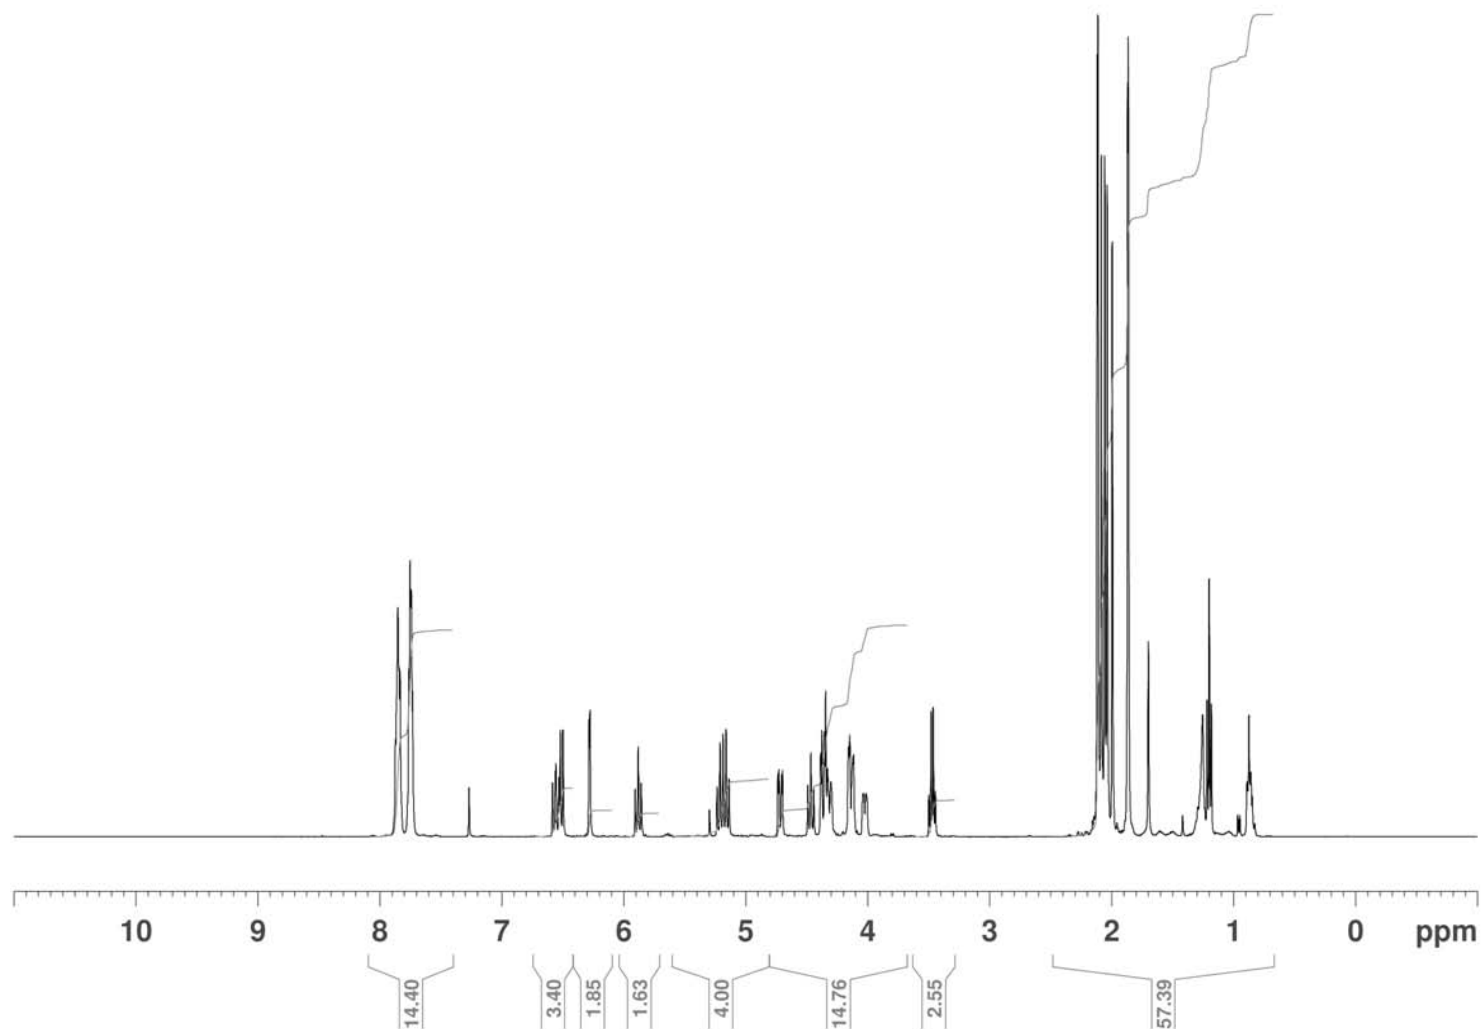

28

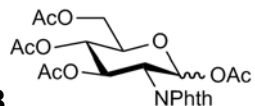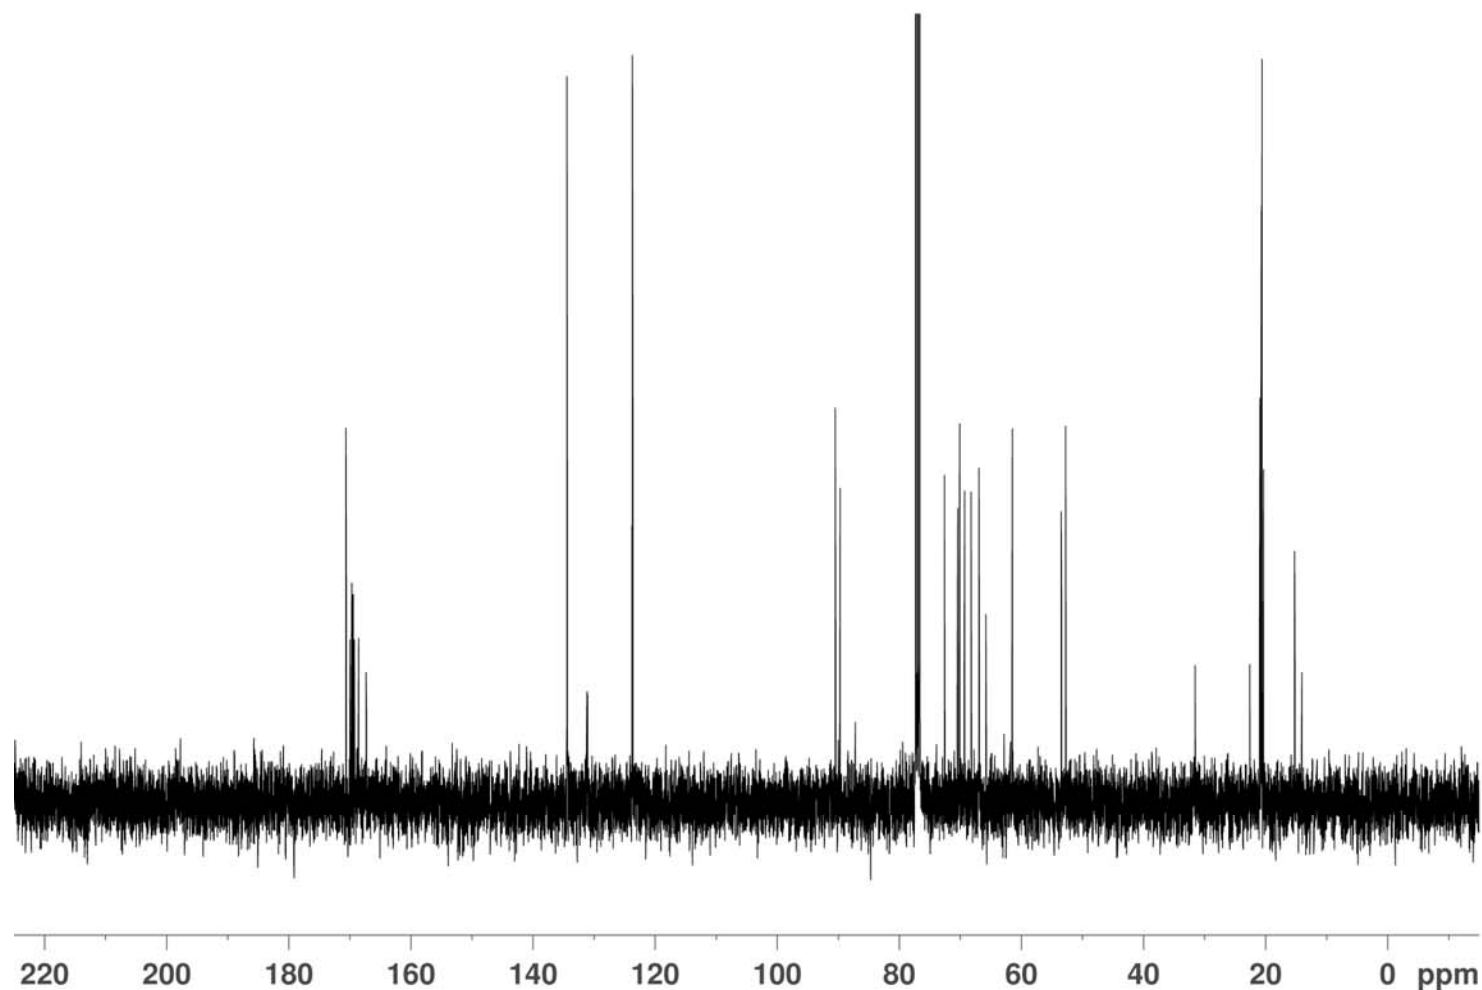

# NMR@CHEM.OX

```

NAME      Mar30-2010-38
EXPNO     2
PROCNO    1
Date_     20100330
Time      14.26
INSTRUM   av400
PROBHD    5 mm QNP 1H/13
PULPROG   zgpg30
TD         32768
SOLVENT   CDC13
NS         256
DS         4
SWH        26178.010 Hz
FIDRES     0.798889 Hz
AQ         0.6259188 sec
RG         32768
DW         19.100 usec
DE         7.50 usec
TE         300.0 K
D1         1.00000000 sec
D11        0.03000000 sec
TD0        1
  
```

```

===== CHANNEL f1 =====
NUC1      13C
P1         9.50 usec
PL1        0.00 dB
SFO1      100.6403931 MHz
  
```

```

===== CHANNEL f2 =====
CPDPRG2   waltz16
NUC2       1H
PCPD2     80.00 usec
PL2        0.00 dB
PL12      19.00 dB
PL13      25.00 dB
SFO2      400.2016008 MHz
SI         32768
SF         100.6303718 MHz
WDW        EM
SSB        0
LB         1.00 Hz
GB         0
PC         1.40
  
```

29

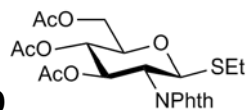

# NMR@CHEM.OX

```

NAME      Mar30-2010-24
EXPNO     1
PROCNO    1
Date_     20100330
Time      10.54
INSTRUM   av400
PROBHD    5 mm QNP 1H/13
PULPROG   zg60
TD         65536
SOLVENT   CDC13
NS         16
DS         2
SWH        8278.146 Hz
FIDRES     0.126314 Hz
AQ         3.9584243 sec
RG         128
DW         60.400 usec
DE         7.50 usec
TE         300.0 K
D1         1.00000000 sec
  
```

```

===== CHANNEL f1 =====
NUC1      1H
P1         9.00 usec
PL1        0.00 dB
SFO1      400.2024714 MHz
SI         32768
SF         400.2000028 MHz
WDW        EM
SSB         0
LB         0.30 Hz
GB         0
PC         1.00
  
```

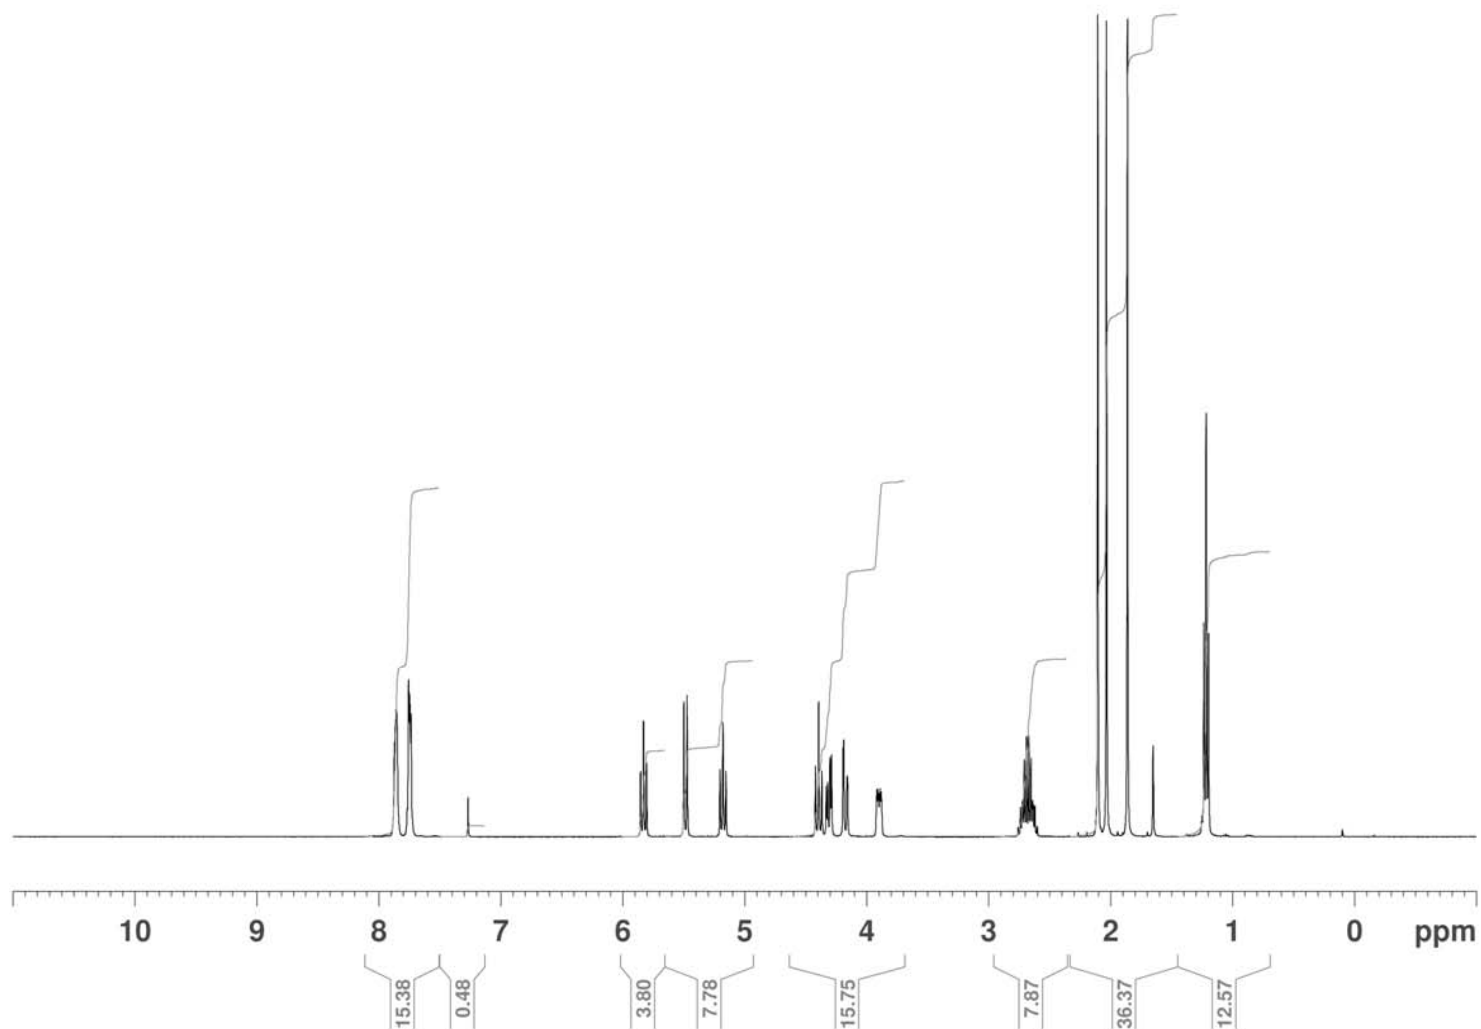



29

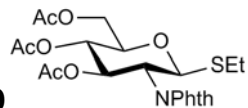

# NMR@CHEM.OX

```

NAME      Mar30-2010-24
EXPNO     2
PROCNO    1
Date_     20100330
Time      11.02
INSTRUM   av400
PROBHD    5 mm QNP 1H/13
PULPROG   zgpg30
TD         32768
SOLVENT   CDC13
NS         256
DS         4
SWH        26178.010 Hz
FIDRES     0.798889 Hz
AQ         0.6259188 sec
RG         32768
DW         19.100 usec
DE         7.50 usec
TE         300.0 K
D1         1.00000000 sec
D11        0.03000000 sec
TD0        1
  
```

```

===== CHANNEL f1 =====
NUC1      13C
P1         9.50 usec
PL1        0.00 dB
SFO1      100.6403931 MHz
  
```

```

===== CHANNEL f2 =====
CPDPRG2   waltz16
NUC2       1H
PCPD2      80.00 usec
PL2         0.00 dB
PL12        19.00 dB
PL13        25.00 dB
SFO2      400.2016008 MHz
SI         32768
SF         100.6303718 MHz
WDW         EM
SSB         0
LB          1.00 Hz
GB          0
PC          1.40
  
```

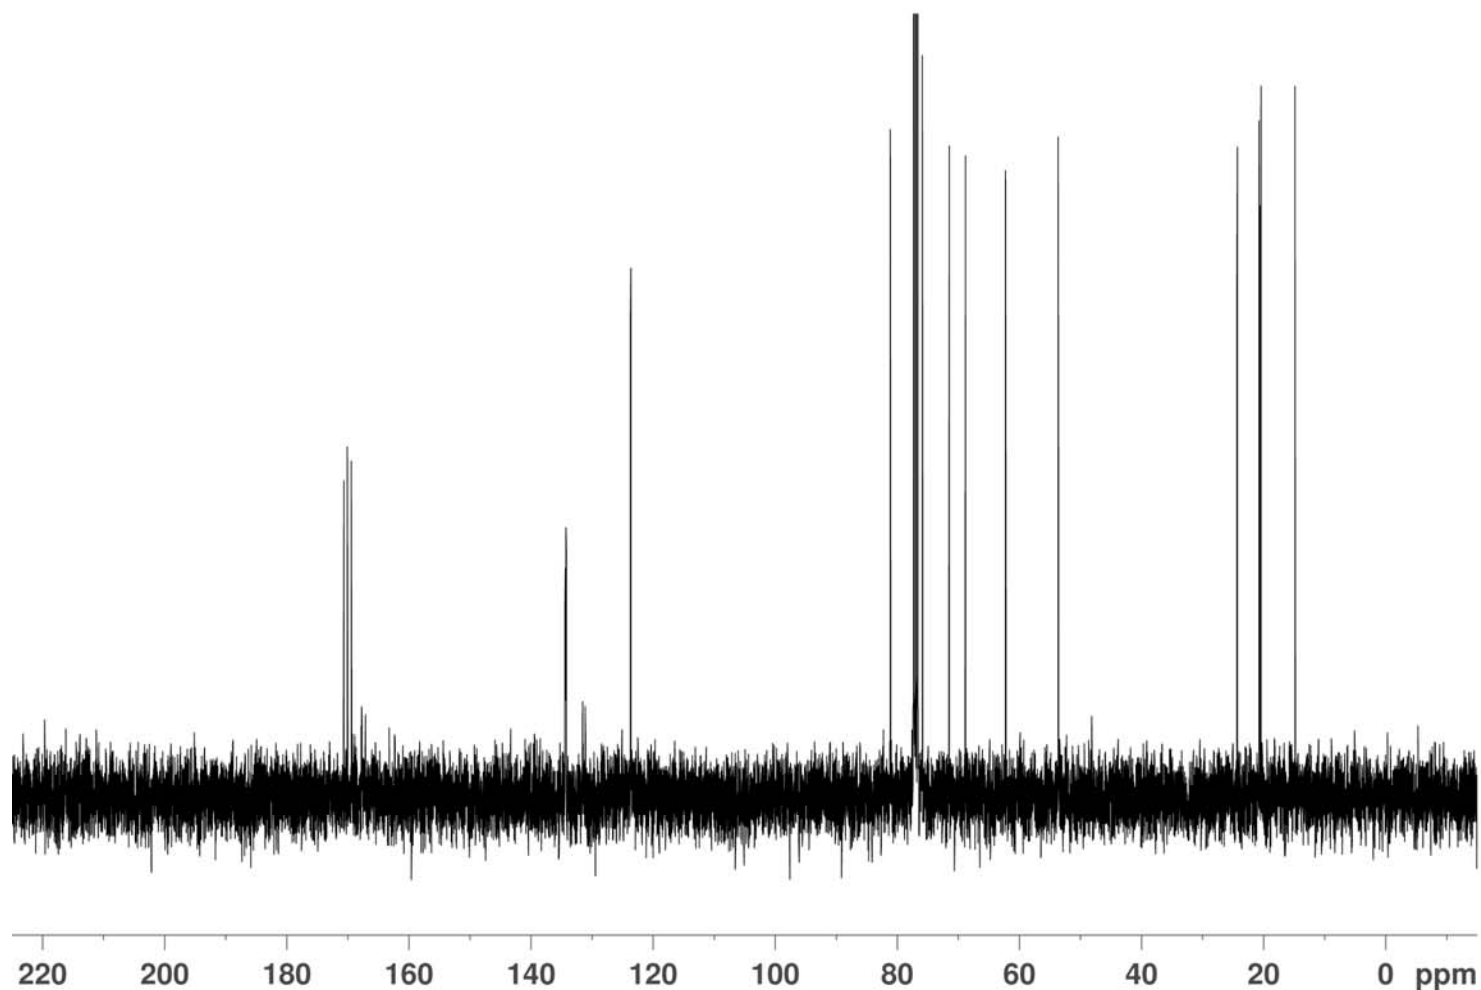

30

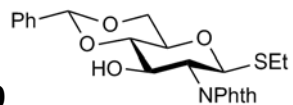

# NMR@CHEM.OX

Current Data Parameters  
 NAME Sep15-2009-20  
 EXPNO 1  
 PROCNO 1

F2 - Acquisition Parameters  
 Date\_ 20090915  
 Time 18.52  
 INSTRUM dpx400  
 PROBHD 5 mm Dual 1H/1  
 PULPROG zg60  
 TD 32768  
 SOLVENT CDCl3  
 NS 16  
 DS 2  
 SWH 5592.841 Hz  
 FIDRES 0.170680 Hz  
 AQ 2.9295092 sec  
 RG 64  
 DW 89.400 usec  
 DE 17.00 usec  
 TE 300.0 K  
 D1 1.0000000 sec

==== CHANNEL f1 =====  
 NUC1 1H  
 P1 7.30 usec  
 PL1 0.00 dB  
 SFO1 400.1320007 MHz

F2 - Processing parameters  
 SI 32768  
 SF 400.1300182 MHz  
 WDW EM  
 SSB 0  
 LB 0.30 Hz  
 GB 0  
 PC 0.60

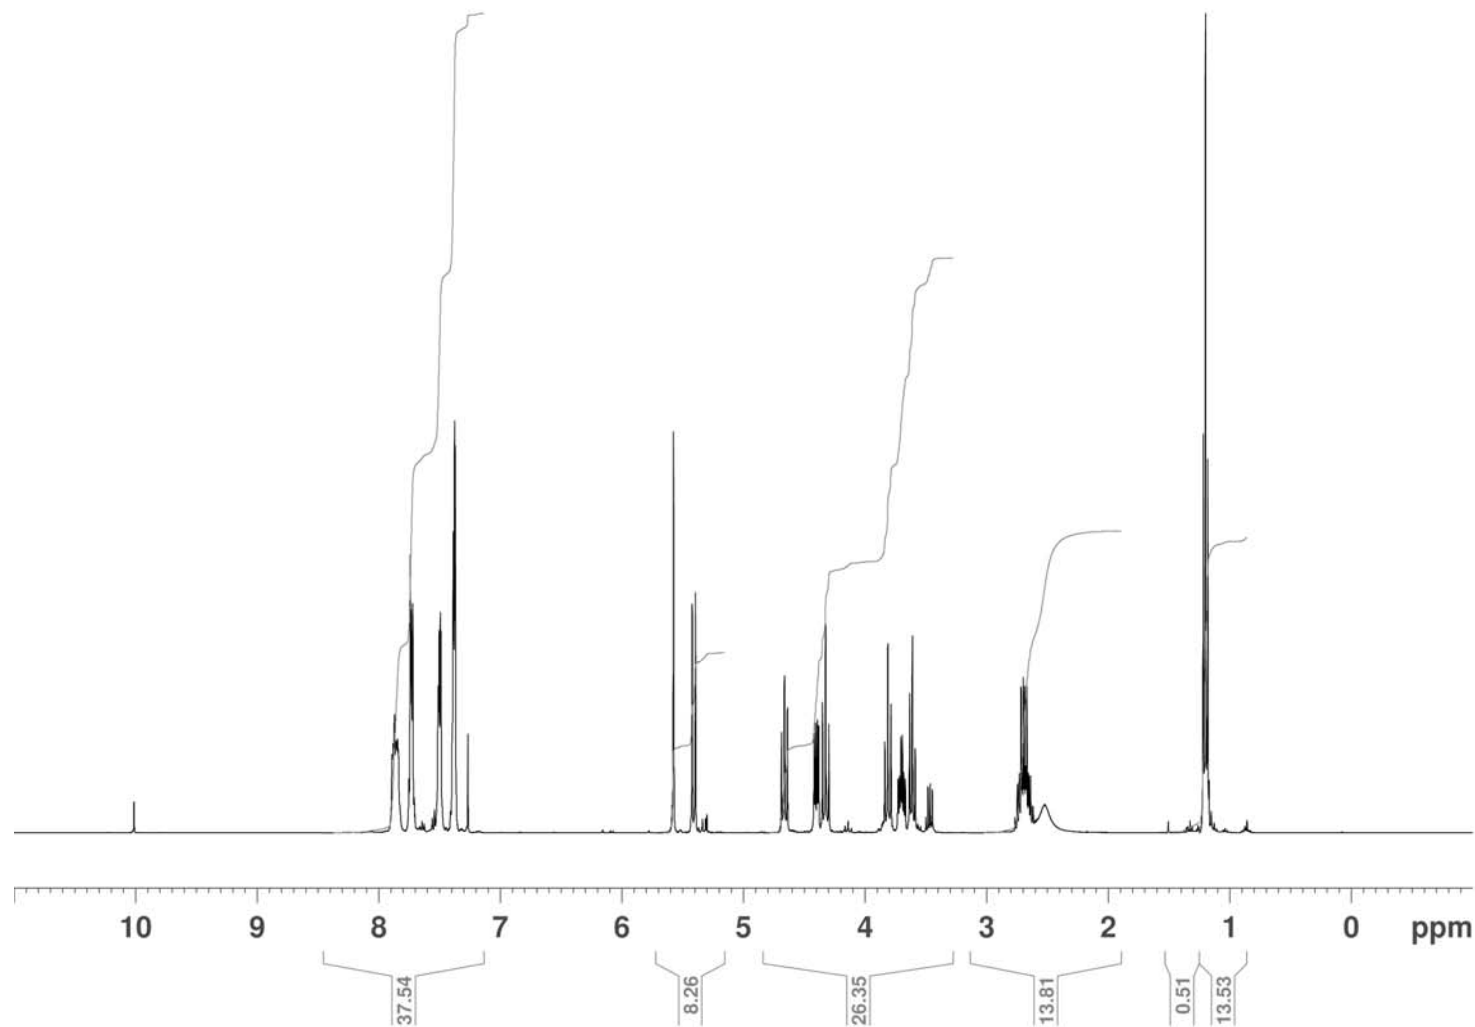

30

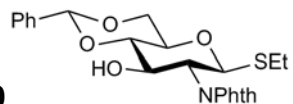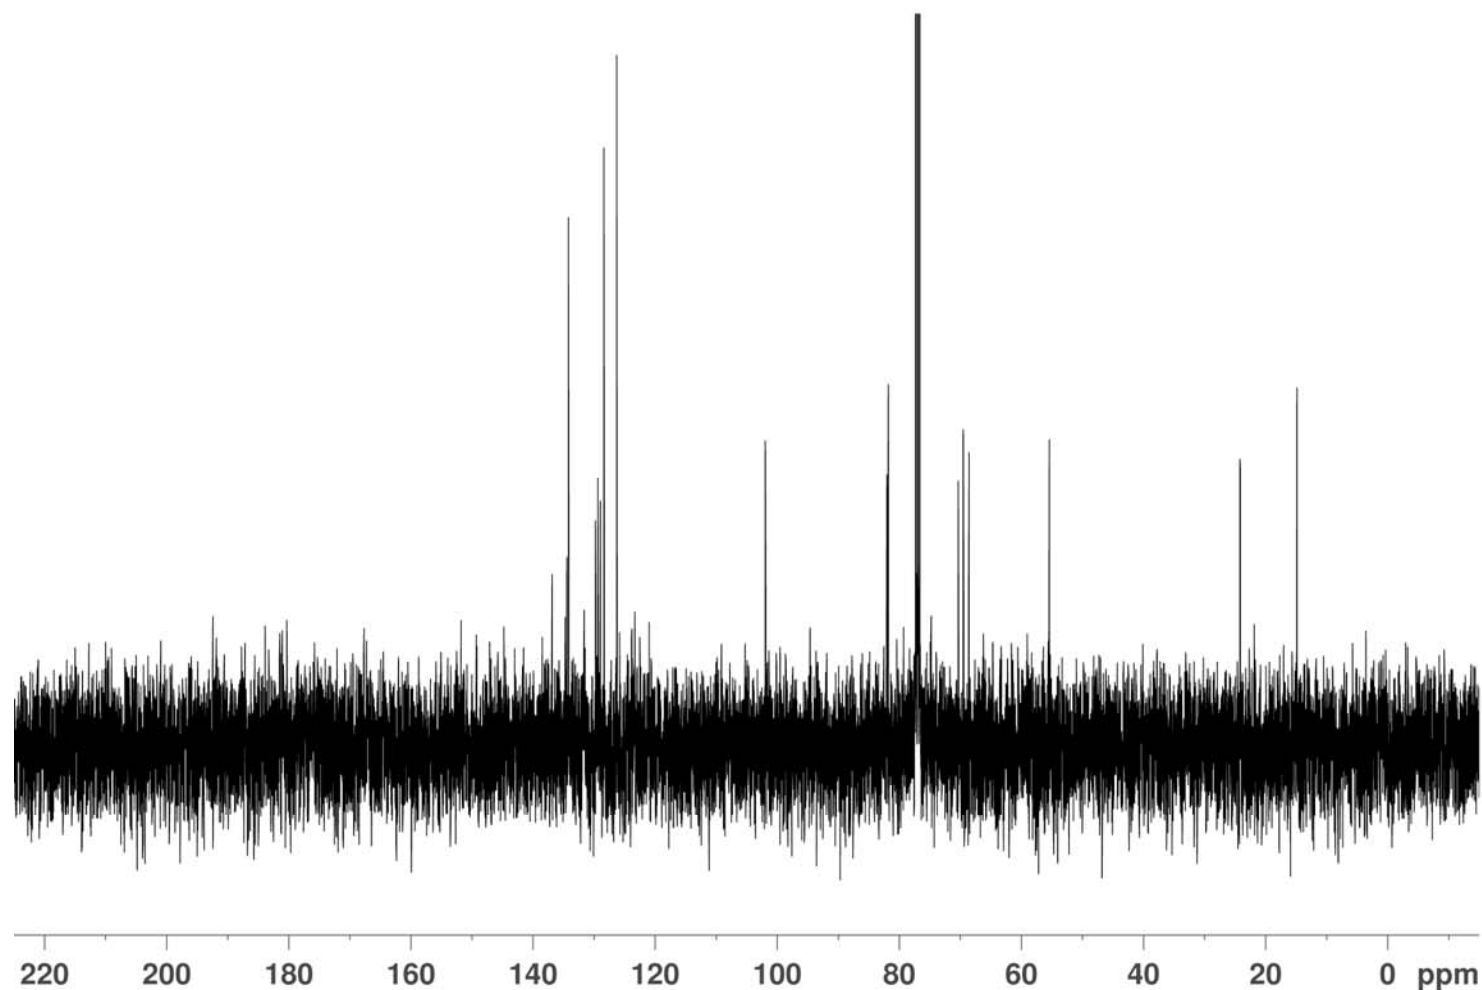

# NMR@CHEM.OX

```

NAME      Sep28-2009-10
EXPNO     3
PROCNO    1
Date_     20090928
Time      12.17
INSTRUM   av400
PROBHD    5 mm QNP 1H/13
PULPROG   zgpg30
TD        32768
SOLVENT   CDC13
NS        256
DS        4
SWH       26178.010 Hz
FIDRES    0.798889 Hz
AQ        0.6259188 sec
RG        32768
DW        19.100 usec
DE        7.50 usec
TE        300.0 K
D1        1.00000000 sec
D11       0.03000000 sec
TD0       1
  
```

```

===== CHANNEL f1 =====
NUC1      13C
P1        9.50 usec
PL1       0.00 dB
SFO1      100.6403931 MHz
  
```

```

===== CHANNEL f2 =====
CPDPRG2   waltz16
NUC2      1H
PCPD2     80.00 usec
PL2       0.00 dB
PL12     19.00 dB
PL13     25.00 dB
SFO2      400.2016008 MHz
SI        32768
SF        100.6303718 MHz
WDW       EM
SSB       0
LB        1.00 Hz
GB        0
PC        1.40
  
```

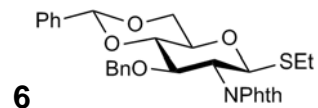

NMROCHEM.OX

Current Data Parameters  
 NAME Sep17-2009-21  
 EXPNO 1  
 PROCNO 1

F2 - Acquisition Parameters  
 Date\_ 20090917  
 Time 19.43  
 INSTRUM dpx400  
 PROBHD 5 mm Dual 1H/1  
 PULPROG zg60  
 TD 32768  
 SOLVENT CDCl3  
 NS 16  
 DS 2  
 SWH 5592.841 Hz  
 FIDRES 0.170680 Hz  
 AQ 2.9295092 sec  
 RG 45.3  
 DW 89.400 usec  
 DE 17.00 usec  
 TE 300.0 K  
 D1 1.00000000 sec

==== CHANNEL f1 =====  
 NUC1 1H  
 P1 7.30 usec  
 PL1 0.00 dB  
 SFO1 400.1320007 MHz

F2 - Processing parameters  
 SI 32768  
 SF 400.1300182 MHz  
 WDW EM  
 SSB 0  
 LB 0.30 Hz  
 GB 0  
 PC 0.60

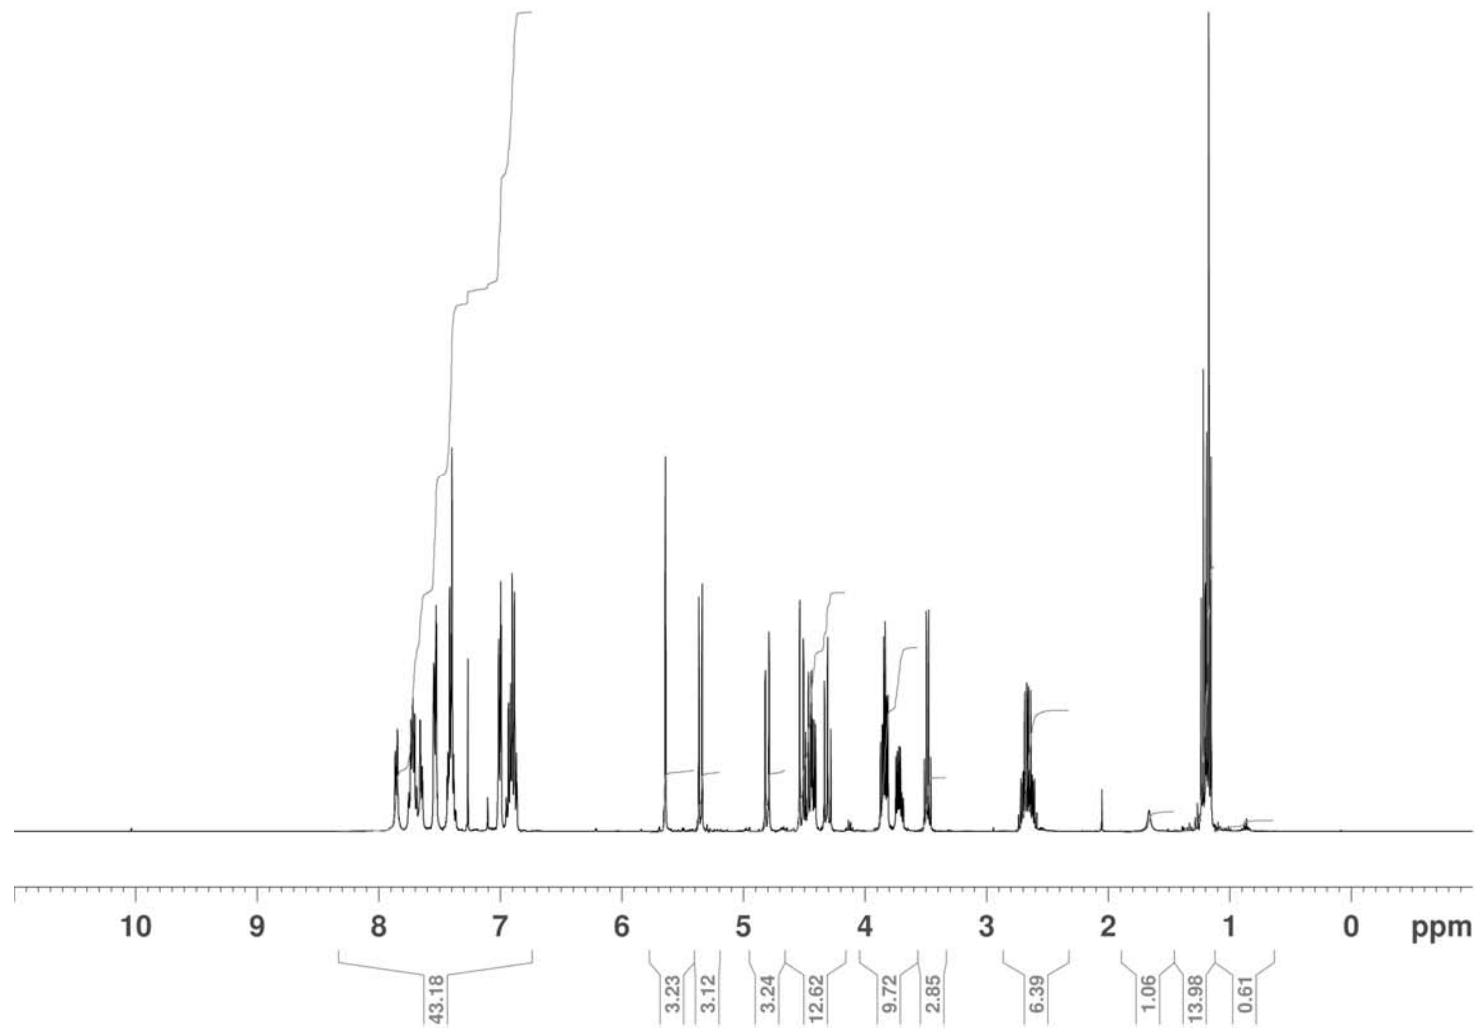

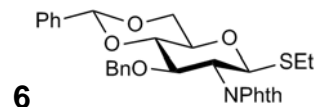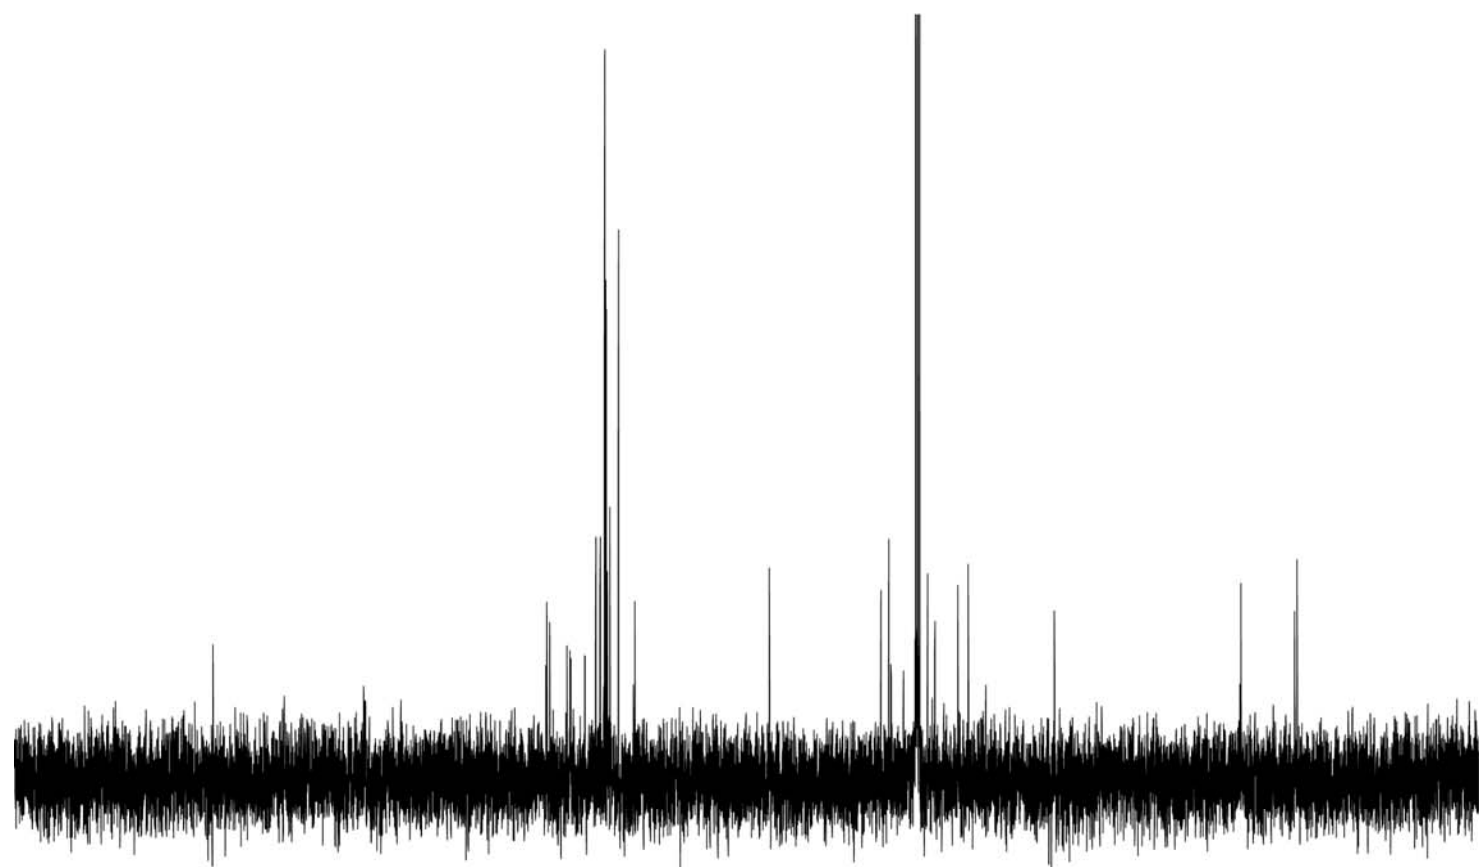

220 200 180 160 140 120 100 80 60 40 20 0 ppm

NMR@CHEM.OX

```

NAME      Sep28-2009-15
EXPNO     3
PROCNO    1
Date_     20090928
Time      14.17
INSTRUM   av400
PROBHD    5 mm QNP 1H/13
PULPROG   zgpg30
TD         32768
SOLVENT   CDC13
NS         256
DS         4
SWH        26178.010 Hz
FIDRES     0.798889 Hz
AQ         0.6259188 sec
RG         32768
DW         19.100 usec
DE         7.50 usec
TE         300.0 K
D1         1.00000000 sec
D11        0.03000000 sec
TD0        1
  
```

```

===== CHANNEL f1 =====
NUC1      13C
P1         9.50 usec
PL1        0.00 dB
SFO1      100.6403931 MHz
  
```

```

===== CHANNEL f2 =====
CPDPRG2   waltz16
NUC2      1H
PCPD2     80.00 usec
PL2        0.00 dB
PL12      19.00 dB
PL13      25.00 dB
SFO2      400.2016008 MHz
SI         32768
SF         100.6303718 MHz
WDW        EM
SSB         0
LB         1.00 Hz
GB         0
PC         1.40
  
```

7

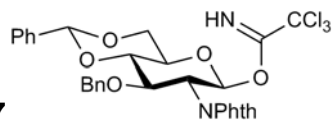

# NMR@CHEM.OX

```

NAME      Jan26-2010-1
EXPNO     1
PROCNO    1
Date_     20100126
Time      8.42
INSTRUM   av400
PROBHD    5 mm QNP 1H/13
PULPROG   zg60
TD         65536
SOLVENT   CDC13
NS         16
DS         2
SWH        8278.146 Hz
FIDRES     0.126314 Hz
AQ         3.9584243 sec
RG         181
DW         60.400 usec
DE         7.50 usec
TE         300.0 K
D1         1.00000000 sec
  
```

```

===== CHANNEL f1 =====
NUC1      1H
P1         9.00 usec
PL1        0.00 dB
SFO1      400.2024714 MHz
SI         32768
SF         400.2000028 MHz
WDW        EM
SSB         0
LB         0.30 Hz
GB         0
PC         1.00
  
```

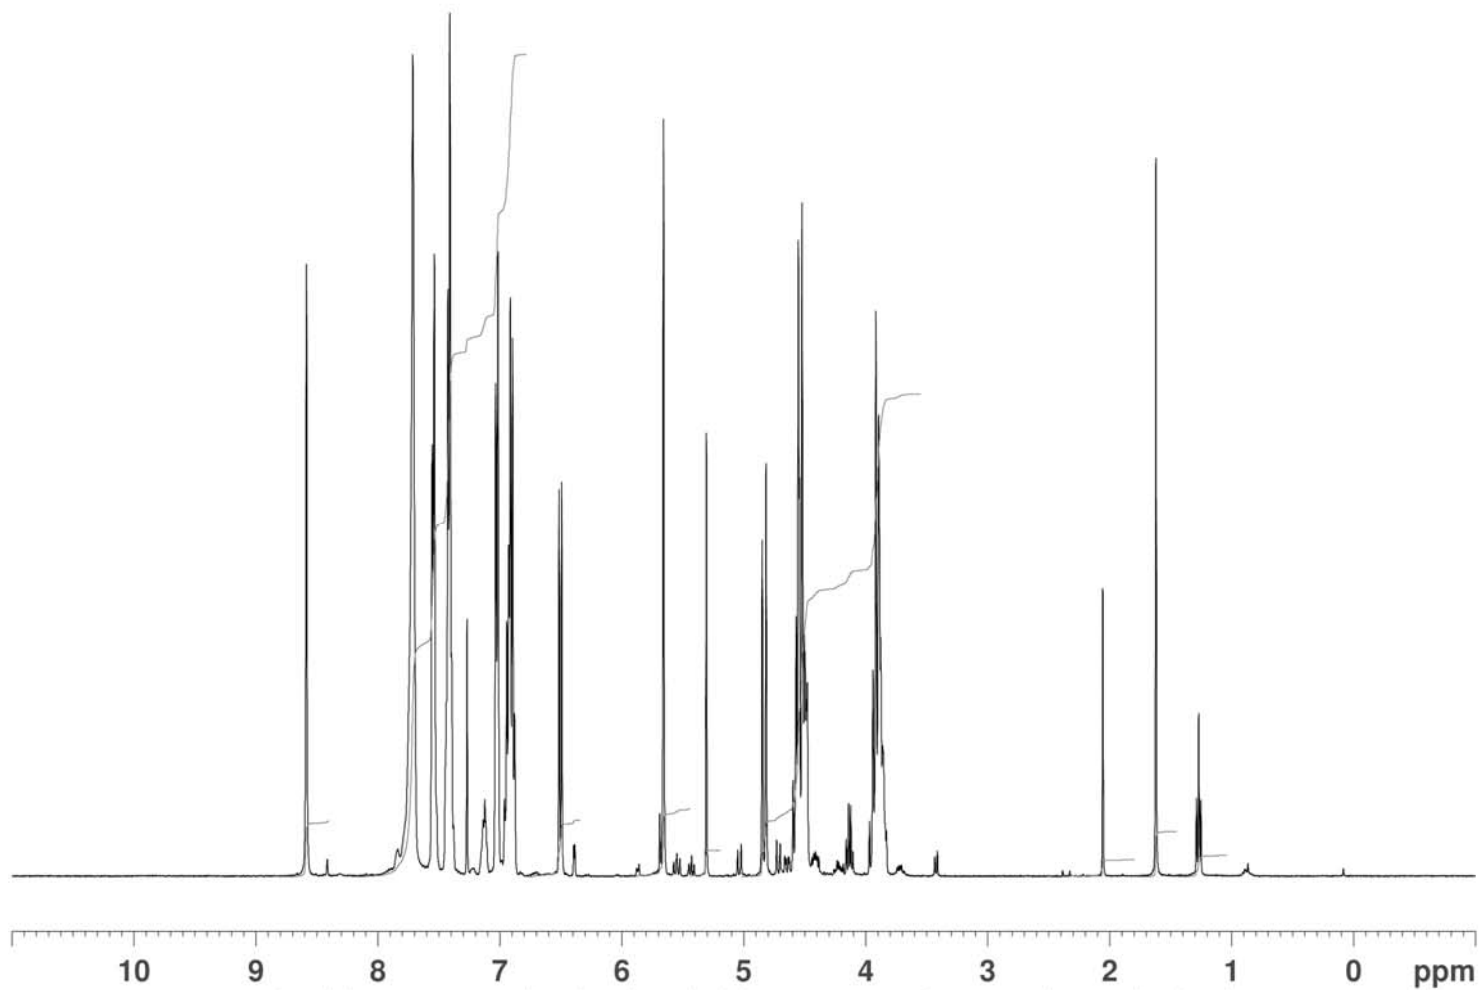

7

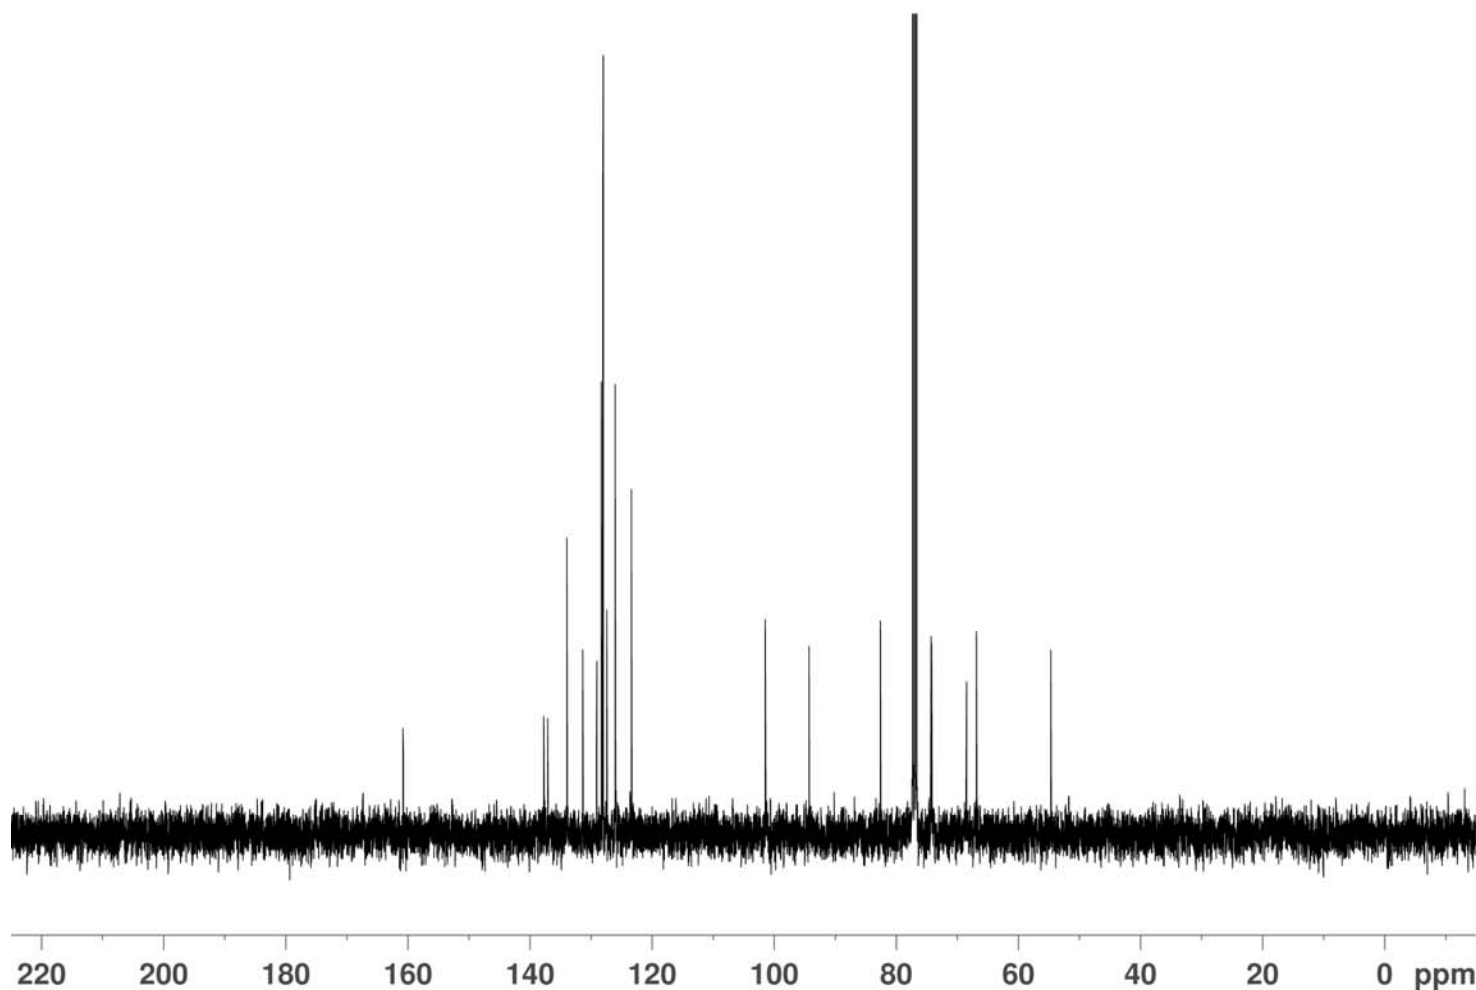

NMR@CHEM.OX

```

NAME      Jan26-2010-1
EXPNO     2
PROCNO    1
Date_     20100126
Time      8.50
INSTRUM   av400
PROBHD    5 mm QNP 1H/13
PULPROG   zgpg30
TD         32768
SOLVENT   CDC13
NS         256
DS         4
SWH        26178.010 Hz
FIDRES     0.798889 Hz
AQ         0.6259188 sec
RG         32768
DW         19.100 usec
DE         7.50 usec
TE         300.0 K
D1         1.00000000 sec
D11        0.03000000 sec
TD0        1
  
```

```

===== CHANNEL f1 =====
NUC1      13C
P1         9.50 usec
PL1        0.00 dB
SFO1      100.6403931 MHz
  
```

```

===== CHANNEL f2 =====
CPDPRG2   waltz16
NUC2      1H
PCPD2     80.00 usec
PL2        0.00 dB
PL12       19.00 dB
PL13       25.00 dB
SFO2      400.2016008 MHz
SI         32768
SF         100.6303718 MHz
WDW        EM
SSB        0
LB         1.00 Hz
GB         0
PC         1.40
  
```

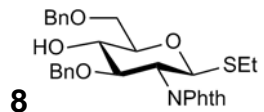

NMR@CHEM.OX

Current Data Parameters  
 NAME Feb15-2010-33  
 EXPNO 1  
 PROCNO 1

F2 - Acquisition Parameters  
 Date\_ 20100215  
 Time 17.14  
 INSTRUM dpx400  
 PROBHD 5 mm Dual 1H/1  
 PULPROG zg60  
 TD 32768  
 SOLVENT CDCl3  
 NS 16  
 DS 2  
 SWH 5592.841 Hz  
 FIDRES 0.170680 Hz  
 AQ 2.9295092 sec  
 RG 128  
 DW 89.400 usec  
 DE 17.00 usec  
 TE 300.0 K  
 D1 1.00000000 sec

==== CHANNEL f1 =====  
 NUC1 1H  
 P1 7.30 usec  
 PL1 0.00 dB  
 SFO1 400.1320007 MHz

F2 - Processing parameters  
 SI 32768  
 SF 400.1300182 MHz  
 WDW EM  
 SSB 0  
 LB 0.30 Hz  
 GB 0  
 PC 0.60

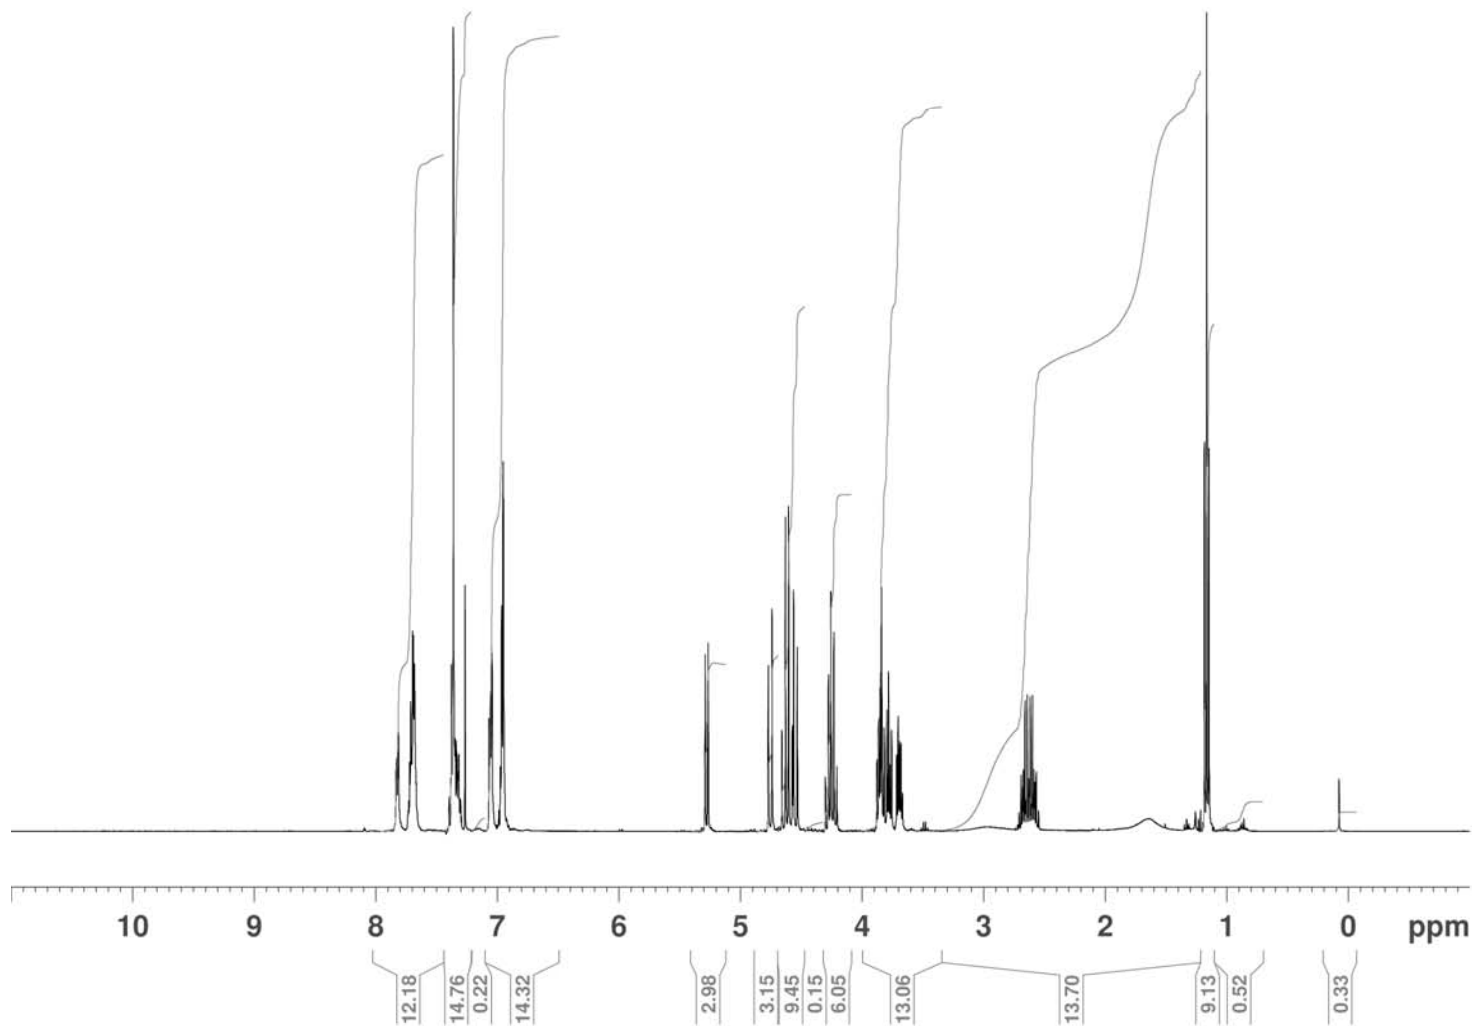



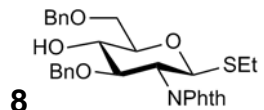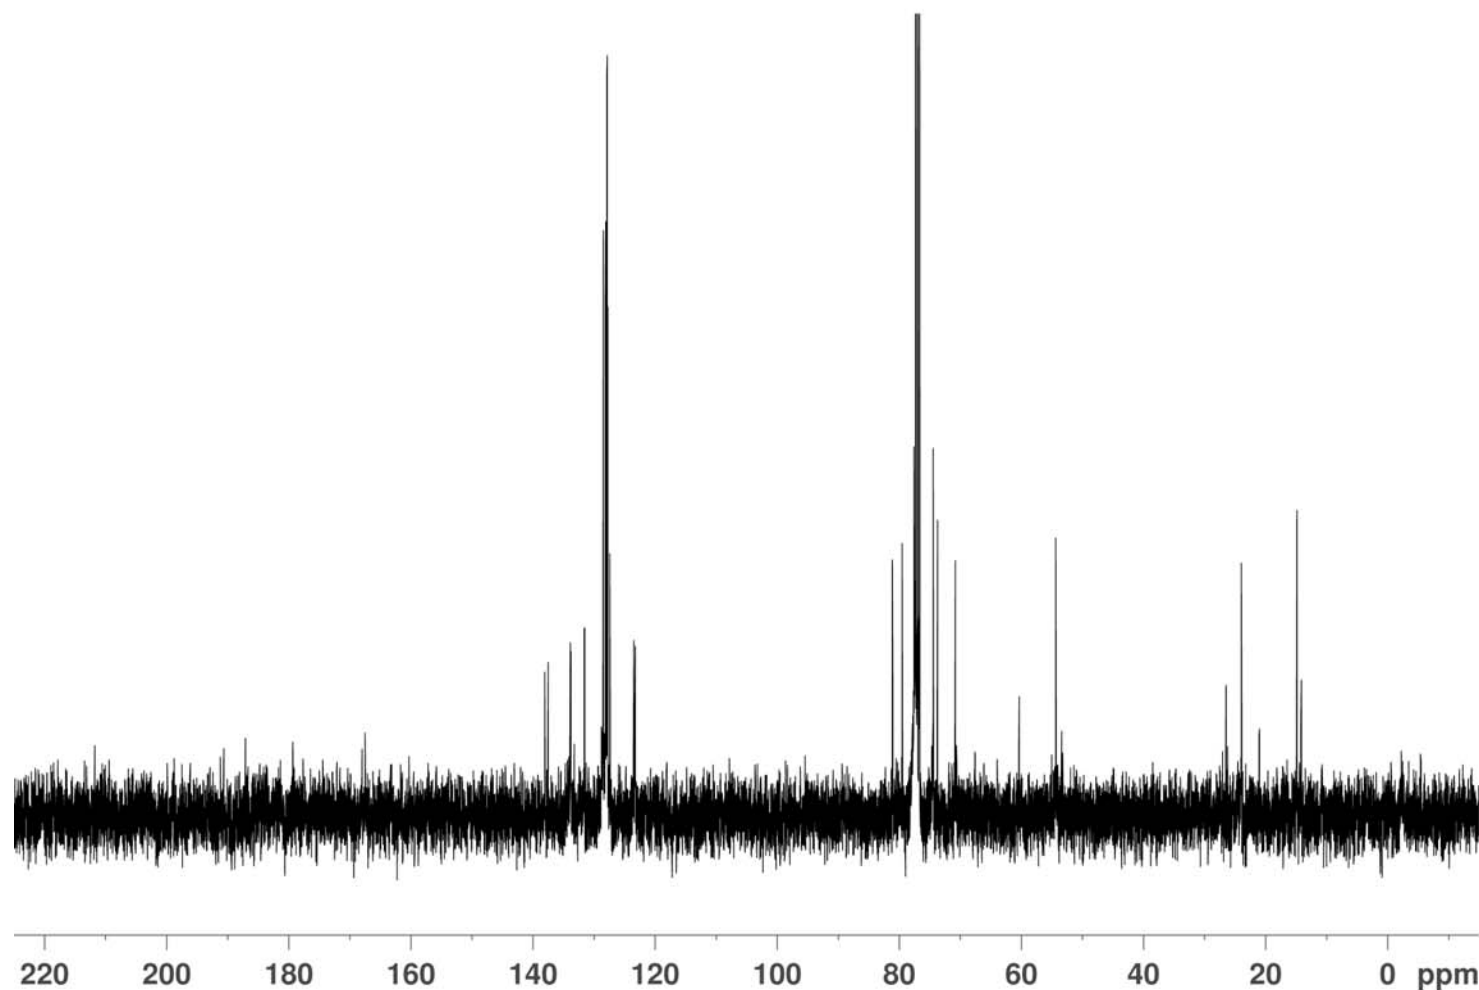

NMR@CHEM.OX

```

NAME      Jan25-2010-4
EXPNO     7
PROCNO    1
Date_     20100126
Time      1.54
INSTRUM   av400
PROBHD    5 mm QNP 1H/13
PULPROG   zgpg30
TD         32768
SOLVENT   CDC13
NS         256
DS         4
SWH        26178.010 Hz
FIDRES     0.798889 Hz
AQ         0.6259188 sec
RG         32768
DW         19.100 usec
DE         7.50 usec
TE         300.0 K
D1         1.00000000 sec
D11        0.03000000 sec
TD0        1
  
```

```

===== CHANNEL f1 =====
NUC1      13C
P1         9.50 usec
PL1        0.00 dB
SFO1      100.6403931 MHz
  
```

```

===== CHANNEL f2 =====
CPDPRG2   waltz16
NUC2      1H
PCPD2     80.00 usec
PL2        0.00 dB
PL12      19.00 dB
PL13      25.00 dB
SFO2      400.2016008 MHz
SI         32768
SF         100.6303718 MHz
WDW        EM
SSB        0
LB         1.00 Hz
GB         0
PC         1.40
  
```

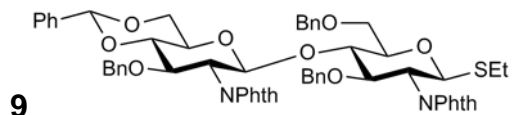

NMROCHEM.OX

```

NAME      Jan27-2010-1
EXPNO     1
PROCNO    1
Date_     20100127
Time      19.38
INSTRUM   av400
PROBHD    5 mm QNP 1H/13
PULPROG   zg60
TD         65536
SOLVENT   CDC13
NS         16
DS         2
SWH        8278.146 Hz
FIDRES     0.126314 Hz
AQ         3.9584243 sec
RG         40.3
DW         60.400 usec
DE         7.50 usec
TE         300.0 K
D1         1.00000000 sec
  
```

```

===== CHANNEL f1 =====
NUC1      1H
P1        9.00 usec
PL1       0.00 dB
SFO1      400.2024714 MHz
SI        32768
SF        400.2000028 MHz
WDW       EM
SSB       0
LB        0.30 Hz
GB        0
PC        1.00
  
```

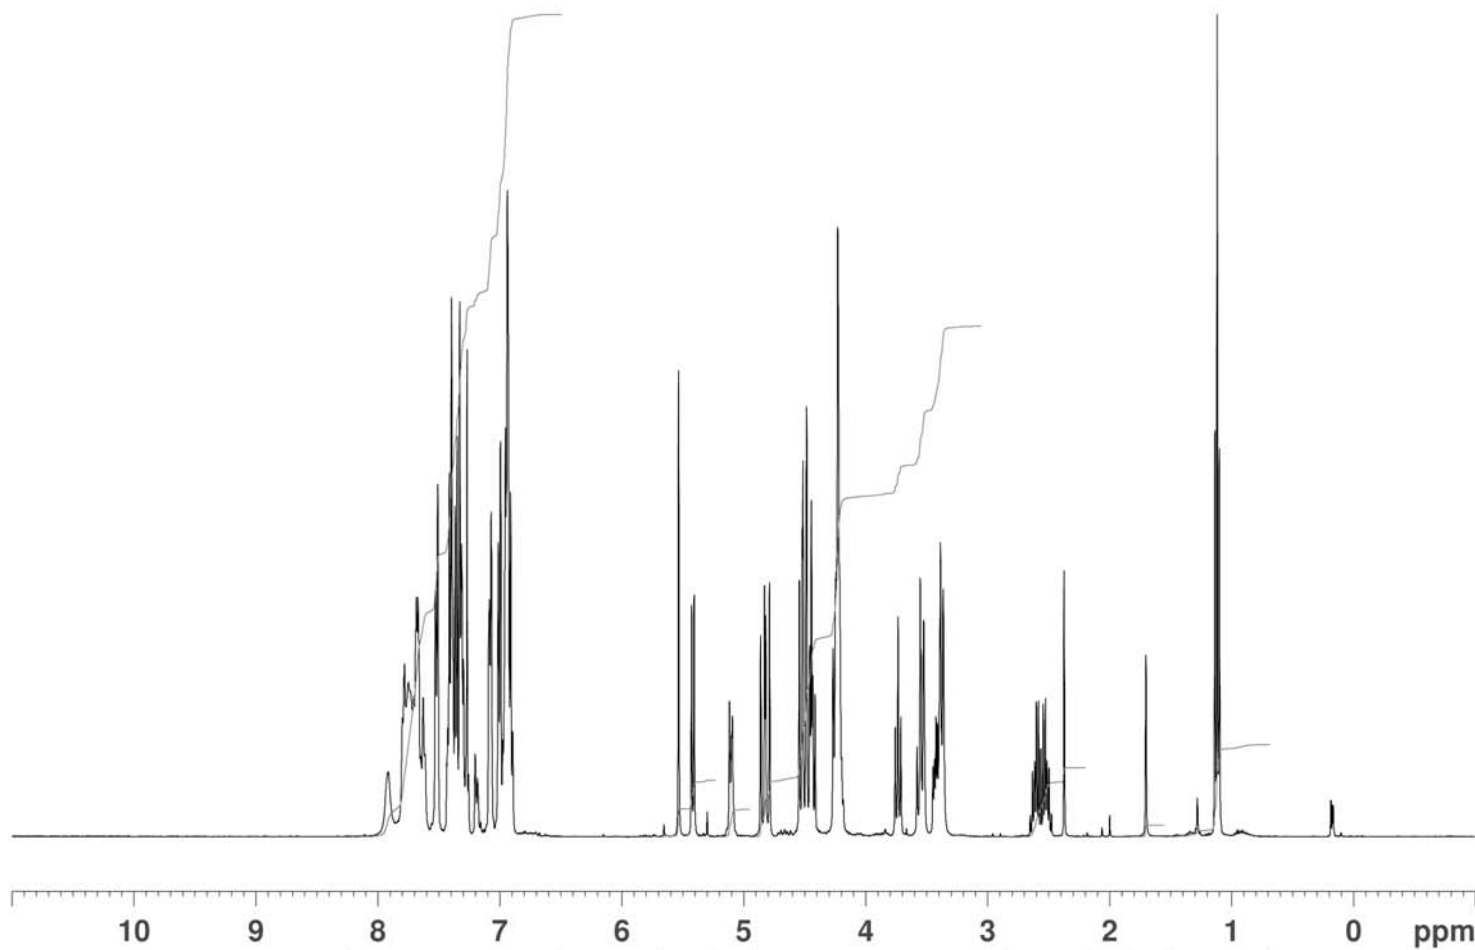

51.79 3.54 1.72 32.13 4.32 0.74 5.76

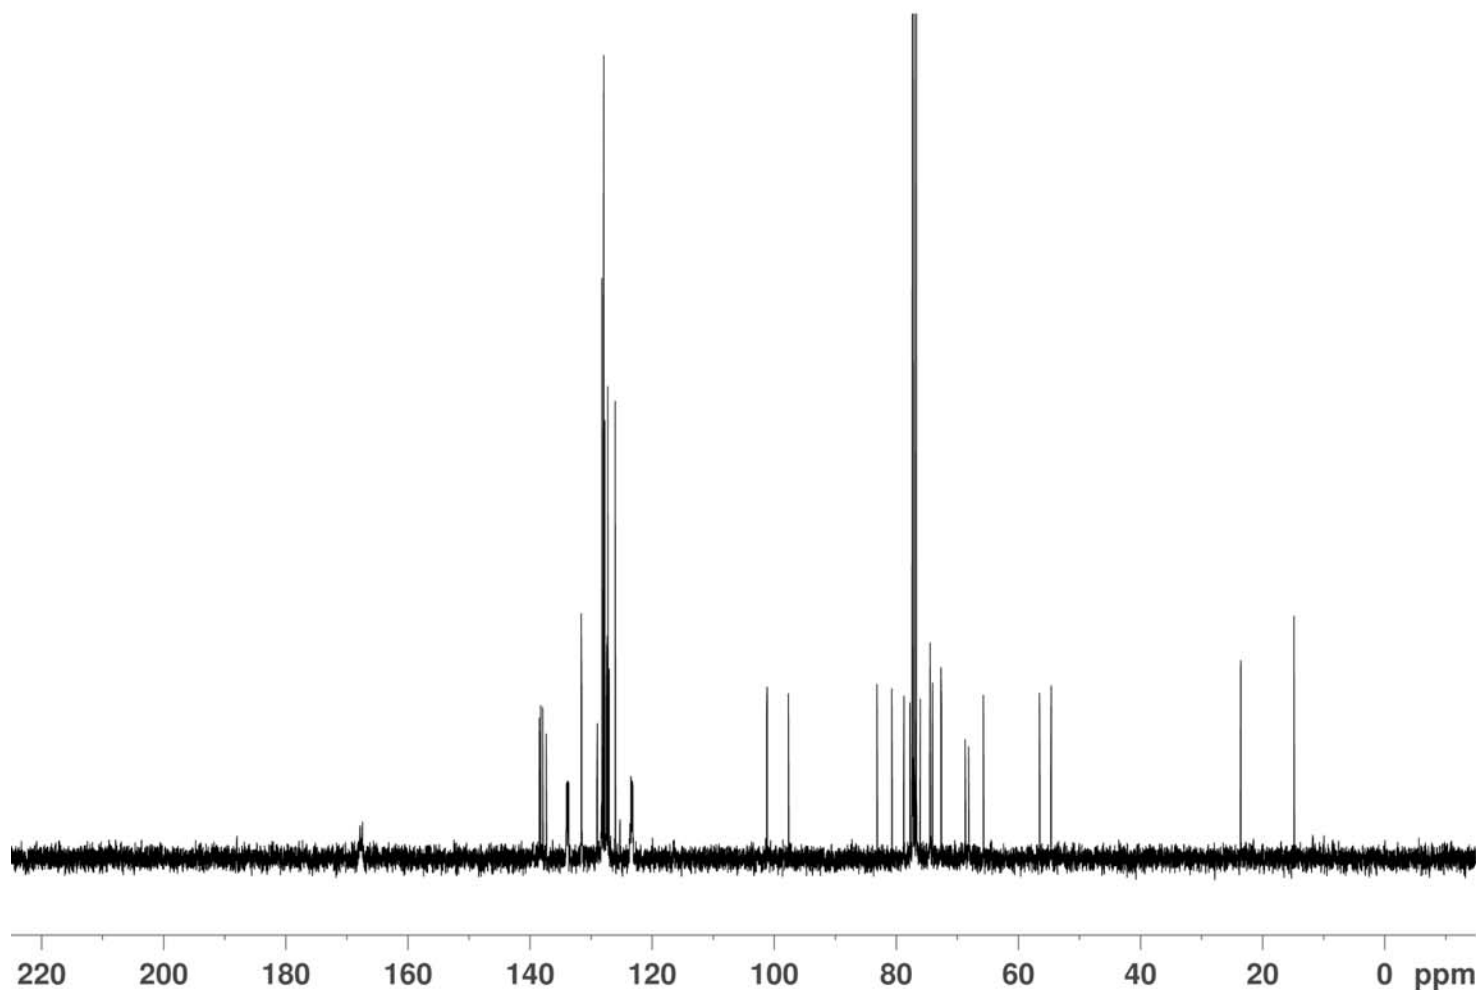

NMR@CHEM.OX

```

NAME      Jan27-2010-1
EXPNO     2
PROCNO    1
Date_     20100127
Time      19.46
INSTRUM   av400
PROBHD    5 mm QNP 1H/13
PULPROG   zgpg30
TD        32768
SOLVENT   CDC13
NS        256
DS        4
SWH       26178.010 Hz
FIDRES    0.798889 Hz
AQ        0.6259188 sec
RG        32768
DW        19.100 usec
DE        7.50 usec
TE        300.0 K
D1        1.00000000 sec
D11       0.03000000 sec
TD0       1
  
```

```

===== CHANNEL f1 =====
NUC1      13C
P1        9.50 usec
PL1       0.00 dB
SFO1      100.6403931 MHz
  
```

```

===== CHANNEL f2 =====
CPDPRG2   waltz16
NUC2      1H
PCPD2     80.00 usec
PL2       0.00 dB
PL12     19.00 dB
PL13     25.00 dB
SFO2      400.2016008 MHz
SI        32768
SF        100.6303718 MHz
WDW       EM
SSB       0
LB        1.00 Hz
GB        0
PC        1.40
  
```

10

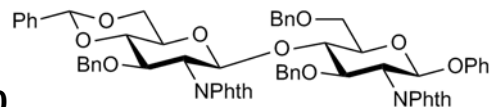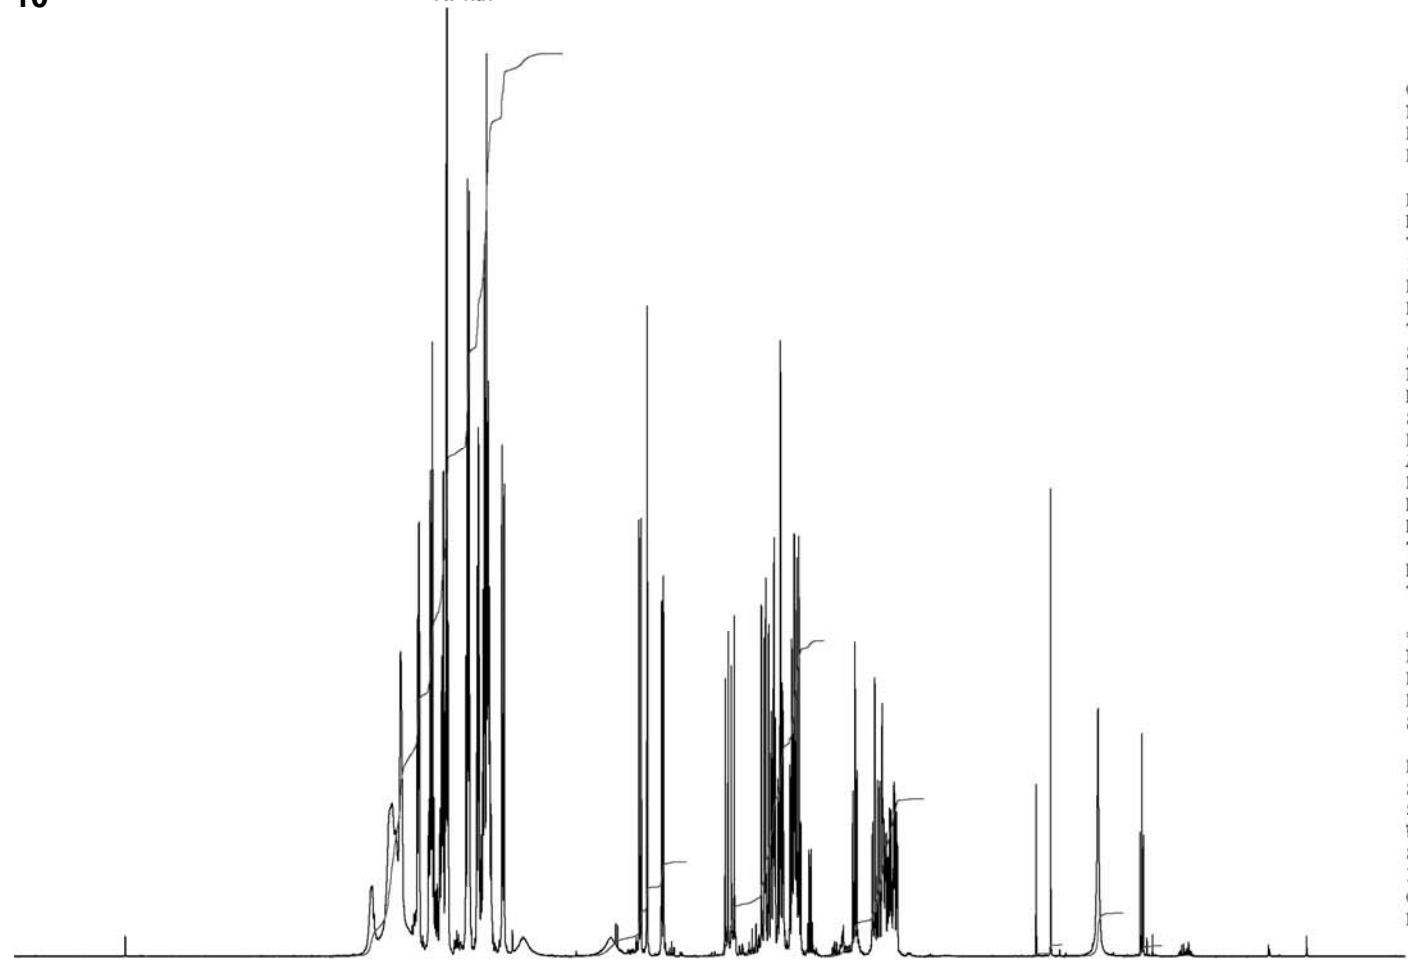

Current Data Parameters  
NAME dg32180311  
EXPNO 1  
PROCNO 1

F2 - Acquisition Parameters  
Date\_ 20051104  
Time 4.37  
INSTRUM avc500  
PROBHD 5 mm CPDUL 13C  
PULPROG zg30  
TD 65536  
SOLVENT CDCl3  
NS 16  
DS 2  
SWH 10330.578 Hz  
FIDRES 0.157632 Hz  
AQ 3.1719923 sec  
RG 4  
DW 48.400 usec  
DE 6.00 usec  
TE 298.0 K  
D1 1.00000000 sec  
TD0 1

----- CHANNEL f1 -----  
NUC1 1H  
P1 9.60 usec  
PL1 -6.00 dB  
SFO1 500.3030896 MHz

F2 - Processing parameters  
SI 32768  
SF 500.3000240 MHz  
WDW EM  
SSB 0  
LB 0.30 Hz  
GB 0  
PC 1.00

10 9 8 7 6 5 4 3 2 1 0 ppm

58.73 6.13 20.49 10.27 0.79 2.86 0.73

10

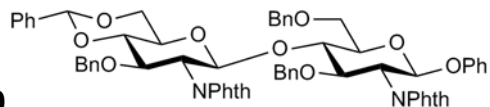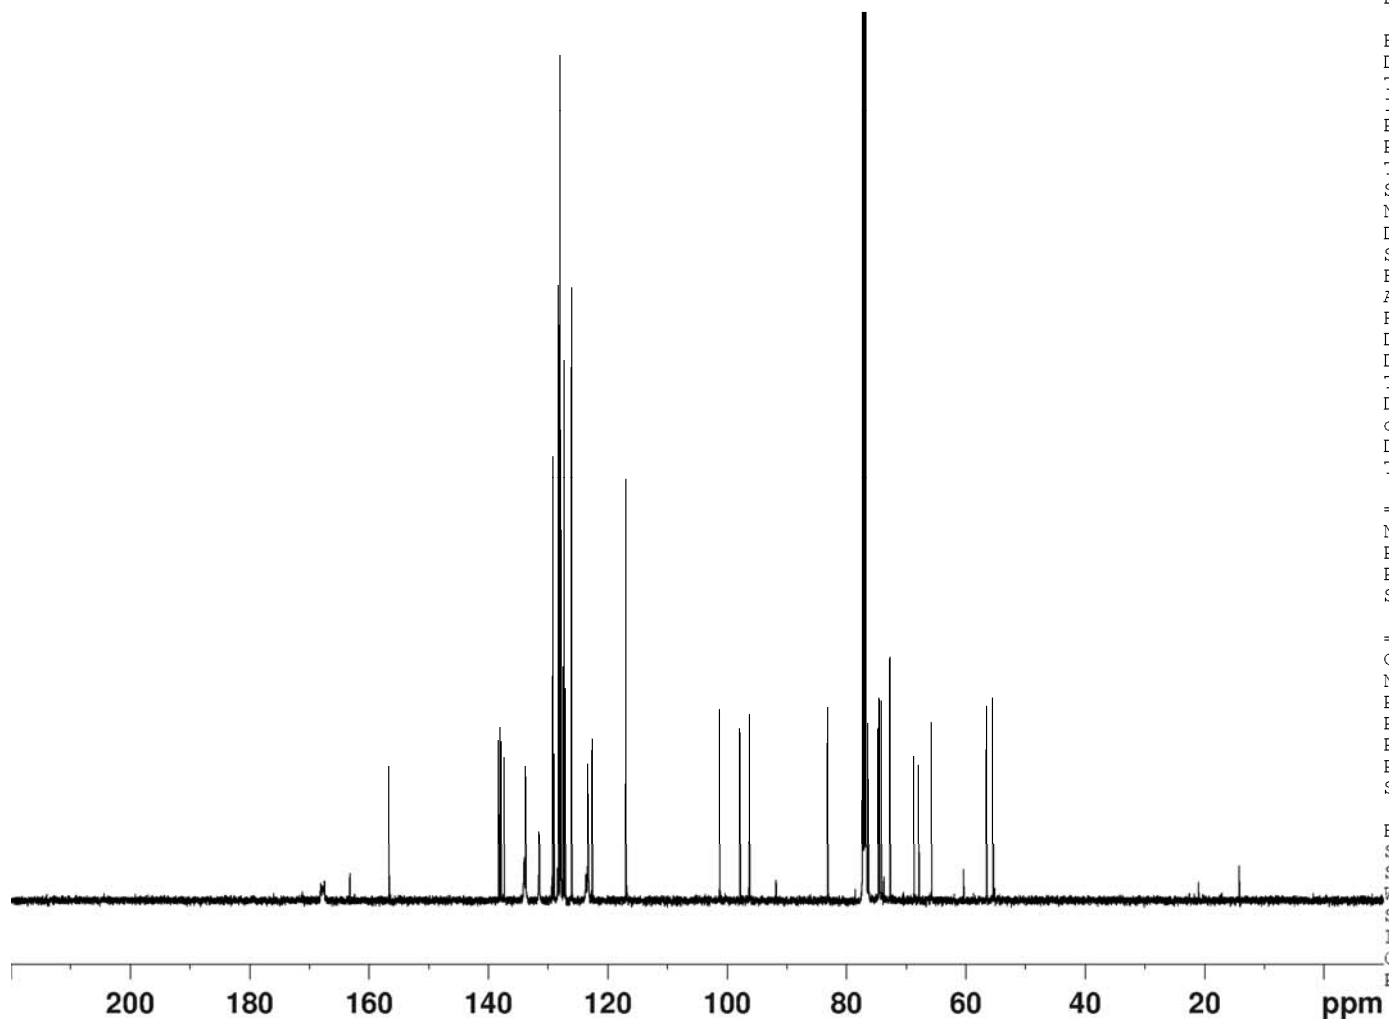

Current Data Parameters  
 NAME dg32180311  
 EXPNO 4  
 PROCNO 1

F2 - Acquisition Parameters  
 Date\_ 20051104  
 Time\_ 5.09  
 INSTRUM avc500  
 PROBHD 5 mm CPDUL 13C  
 PULPROG zgpg30  
 TD 65536  
 SOLVENT CDCl3  
 NS 256  
 DS 2  
 SWH 31250.000 Hz  
 FIDRES 0.476837 Hz  
 AQ 1.0486259 sec  
 RG 1620  
 DW 16.000 usec  
 DE 20.00 usec  
 TE 298.0 K  
 D1 2.00000000 sec  
 d11 0.03000000 sec  
 DELTA 1.89999998 sec  
 TD0 1

==== CHANNEL f1 =====  
 NUC1 13C  
 P1 8.00 usec  
 PL1 -4.40 dB  
 SFO1 125.8131151 MHz

==== CHANNEL f2 =====  
 CPDPRC2 waltz16  
 NUC2 1H  
 PCPD2 80.00 usec  
 PL2 -6.00 dB  
 PL12 12.40 dB  
 PL13 17.00 dB  
 SFO2 500.3020012 MHz

F2 - Processing parameters  
 SI 32768  
 SF 125.8005438 MHz  
 WDW EM  
 SSB 0  
 LB 1.00 Hz  
 GB 0  
 PC 1.40

31

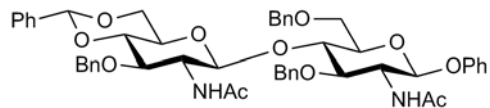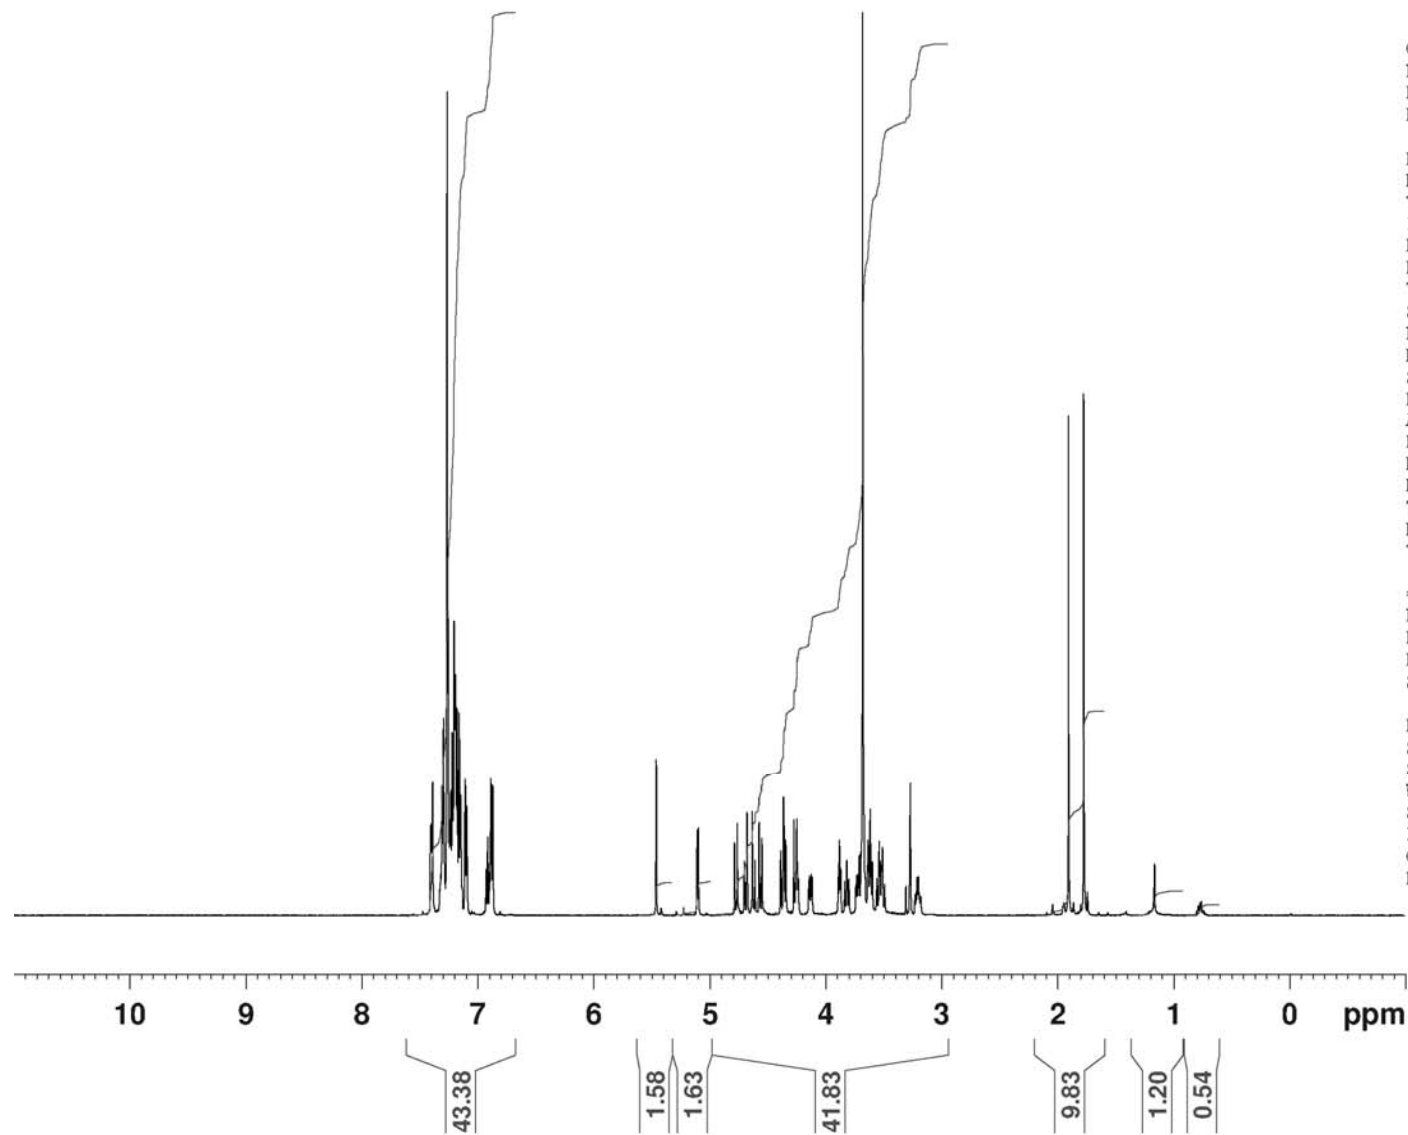

Current Data Parameters  
 NAME dg33532311  
 EXPNO 1  
 PROCNO 1

F2 - Acquisition Parameters  
 Date\_ 20051124  
 Time 18.40  
 INSTRUM avc500  
 PROBHD 5 mm CPDUL 13C  
 PULPROG zg30  
 TD 65536  
 SOLVENT CDCl3  
 NS 16  
 DS 2  
 SWH 10330.578 Hz  
 FIDRES 0.157632 Hz  
 AQ 3.1719923 sec  
 RG 4  
 DW 48.400 usec  
 DE 6.00 usec  
 TE 298.0 K  
 D1 1.00000000 sec  
 TD0 1

===== CHANNEL f1 =====  
 NUC1 1H  
 P1 9.60 usec  
 PL1 -6.00 dB  
 SFO1 500.3030896 MHz

F2 - Processing parameters  
 SI 32768  
 SF 500.3000240 MHz  
 WDW EM  
 SSB 0  
 LB 0.30 Hz  
 GB 0  
 PC 1.00

31



Current Data Parameters  
 NAME dg33532311  
 EXPNO 6  
 PROCNO 1

F2 - Acquisition Parameters  
 Date\_ 20051123  
 Time\_ 12.58  
 INSTRUM avc500  
 PROBHD 5 mm CPDUL 13C  
 PULPROG dept135  
 TD 65536  
 SOLVENT MeOD  
 NS 256  
 DS 2  
 SWH 31250.000 Hz  
 FIDRES 0.476837 Hz  
 AQ 1.0486259 sec  
 RG 1620  
 DW 16.000 usec  
 DE 20.00 usec  
 TE 297.7 K  
 CNST2 145.0000000  
 D1 2.0000000 sec  
 d2 0.00344828 sec  
 d12 0.00002000 sec  
 DELTA 0.00001019 sec  
 TD0 1

===== CHANNEL f1 =====  
 NUC1 13C  
 P1 8.00 usec  
 p2 16.00 usec  
 PL1 -4.40 dB  
 SFO1 125.8131151 MHz

===== CHANNEL f2 =====  
 CPDPRG2 waltz16  
 NUC2 1H  
 P3 10.60 usec  
 p4 21.20 usec  
 PCPD2 80.00 usec  
 PL2 -6.00 dB  
 PL12 12.40 dB  
 SFO2 500.3020012 MHz

F2 Processing parameters  
 SI 32768  
 SF 125.8003564 MHz  
 WDW EM  
 SSB 0  
 LB 1.00 Hz  
 GB 0  
 PC 1.40

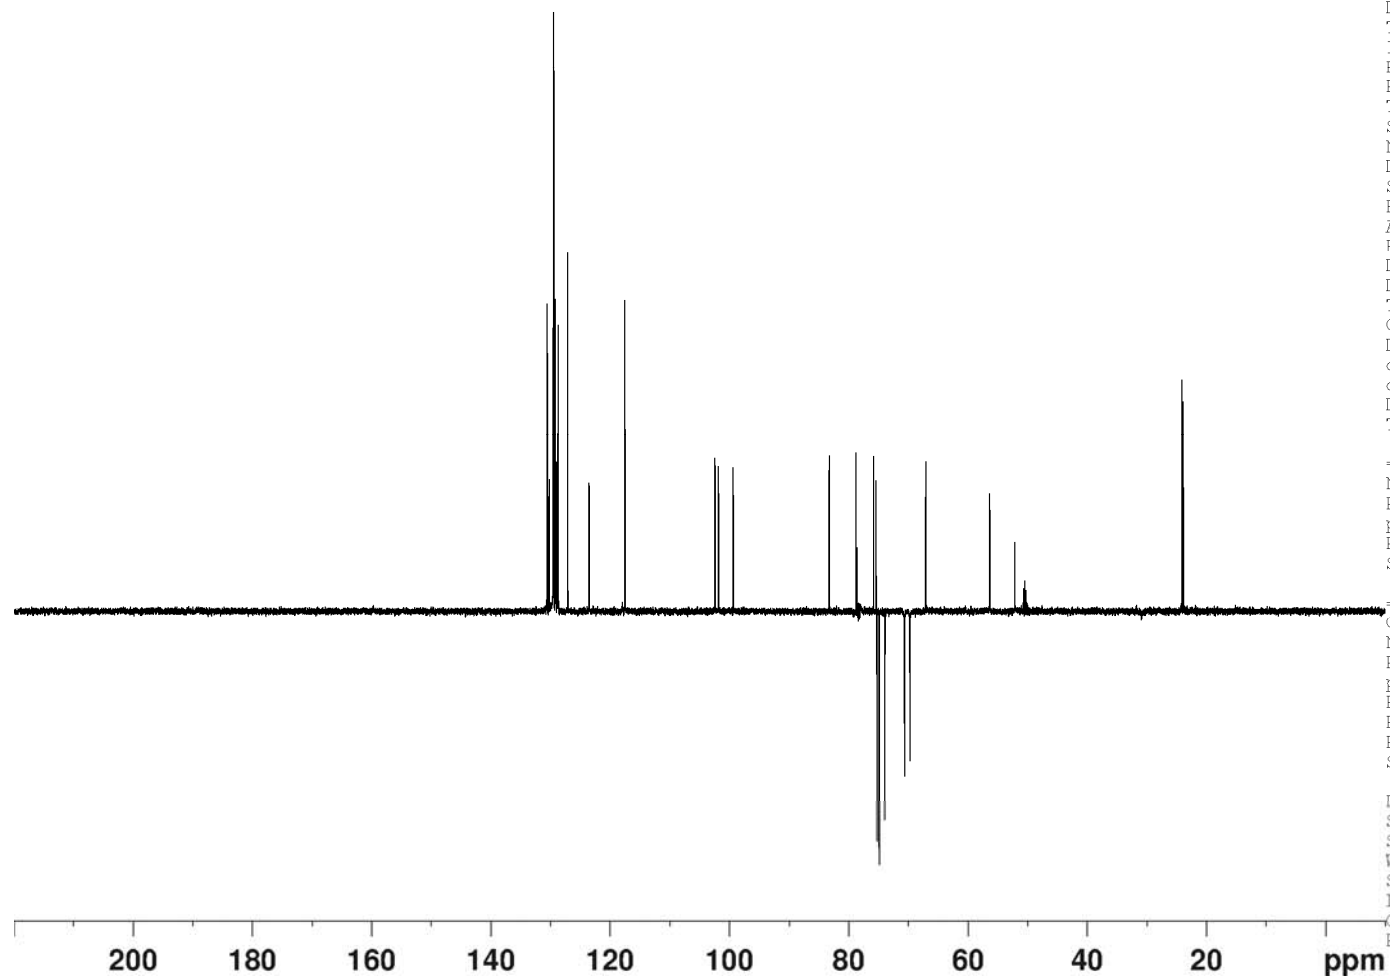

32

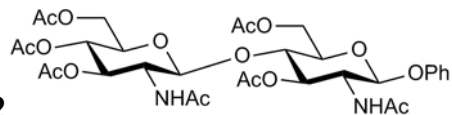

NMR@CHEM.OX

Current Data Parameters  
 NAME dg28852608  
 EXPNO 1  
 PROCNO 1

F2 - Acquisition Parameters  
 Date\_ 20050826  
 Time 12.17  
 INSTRUM avc500  
 PROBEHD 5 mm CPDUL 13C  
 PULPROG zg30  
 TD 65536  
 SOLVENT MeOD  
 NS 16  
 DS 2  
 SWH 10330.578 Hz  
 FIDRES 0.157632 Hz  
 AQ 3.1719923 sec  
 RG 4  
 DW 48.400 usec  
 DE 6.00 usec  
 TE 298.0 K  
 D1 1.00000000 sec  
 TDO 1

==== CHANNEL f1 =====  
 NUC1 1H  
 P1 9.60 usec  
 PL1 -6.00 dB  
 SF01 500.3030896 MHz

F2 - Processing parameters  
 SI 32768  
 SF 500.3000000 MHz  
 WDW EM  
 SSB 0  
 LB 0.30 Hz  
 GB 0  
 PC 1.00

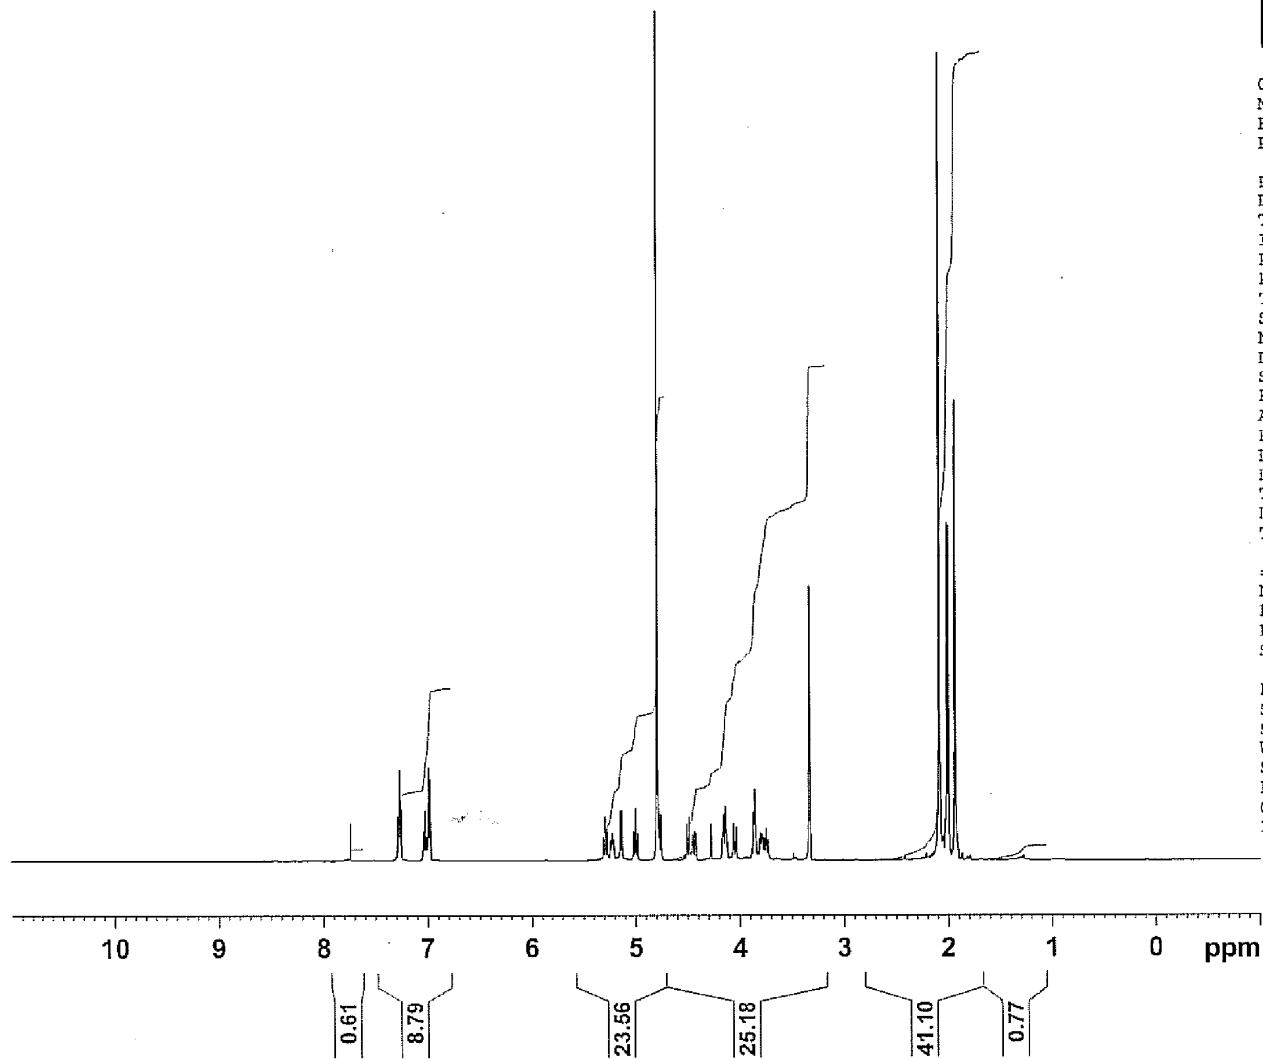



32



NMROCHEM.OX

Current Data Parameters  
 NAME dg28852608  
 EXPNO 3  
 PROCNO 1

F2 - Acquisition Parameters  
 Date\_ 20050826  
 Time 12.36  
 INSTRUM avc500  
 PROBHD 5 mm CPDUL 13C  
 PULPROG zgpg30  
 TD 65536  
 SOLVENT MeOD  
 NS 256  
 DS 2  
 SWH 31250.000 Hz  
 FIDRES 0.476837 Hz  
 AQ 1.0486259 sec  
 RG 1620  
 DW 16.000 usec  
 DE 20.00 usec  
 TE 298.0 K  
 D1 2.00000000 sec  
 d11 0.03000000 sec  
 DELTA 1.89999998 sec  
 TDO 1

===== CHANNEL f1 =====  
 NUC1 13C  
 P1 8.00 usec  
 PL1 -4.40 dB  
 SFO1 125.8131151 MHz

===== CHANNEL f2 =====  
 CPDPRG2 waltz16  
 NUC2 1H  
 PCPD2 80.00 usec  
 PL2 -6.00 dB  
 PL12 12.40 dB  
 PL13 17.00 dB  
 SFO2 500.3020012 MHz

F2 - Processing parameters  
 SI 32768  
 SF 125.8003564 MHz  
 WDW EM  
 SSB 0  
 LB 1.00 Hz  
 GB 0  
 PC 1.40

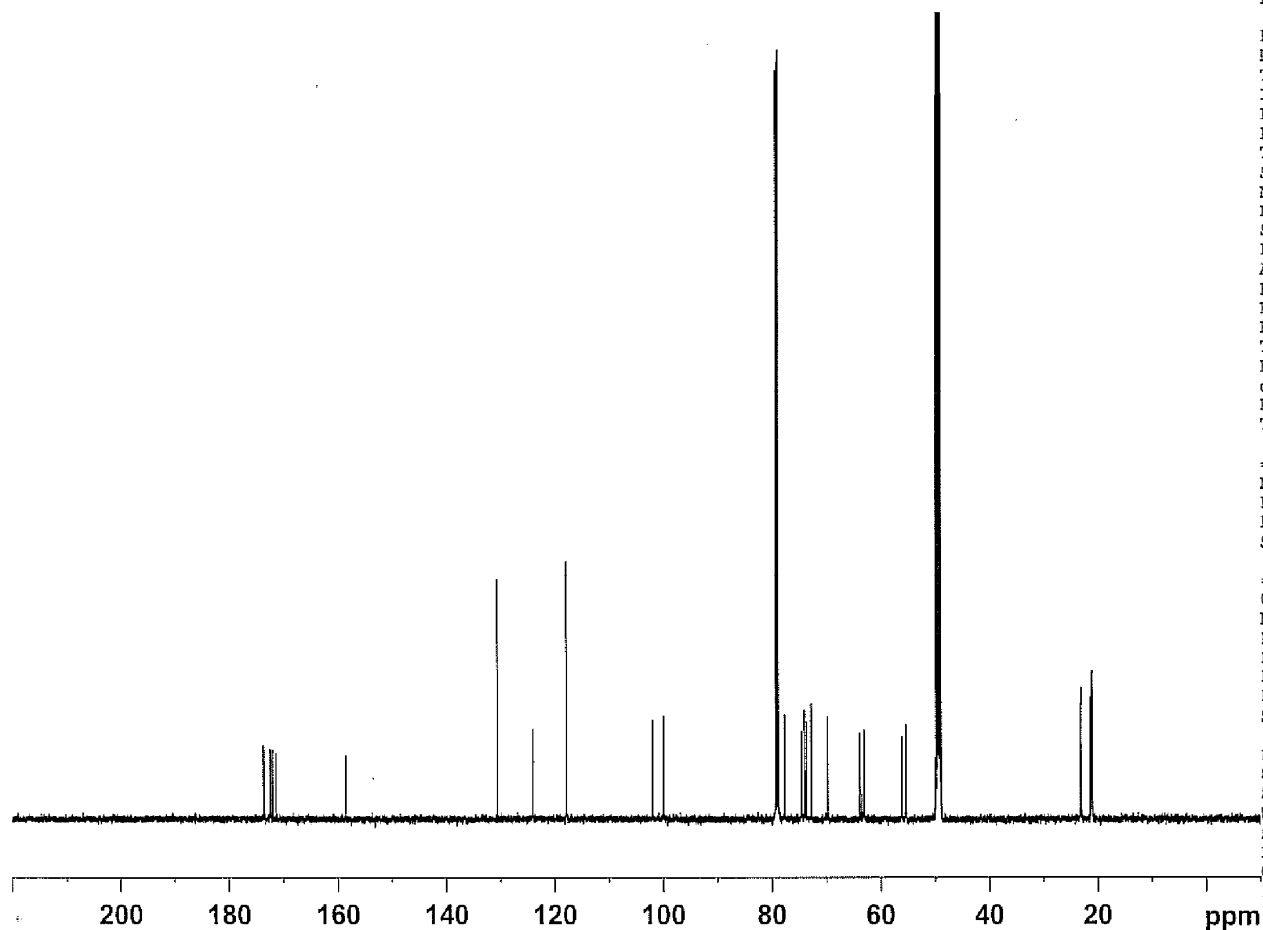

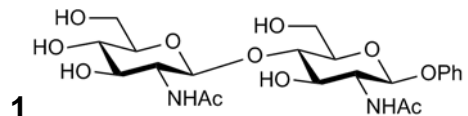

NMR@CHEM.OX

Current Data Parameters  
 NAME dg33722511  
 EXPNO 1  
 PROCNO 1

F2 - Acquisition Parameters  
 Date\_ 20051125  
 Time 10.34  
 INSTRUM avc500  
 PROBHD 5 mm CPDUL 13C  
 PULPROG zg30  
 TD 65536  
 SOLVENT D2O  
 NS 16  
 DS 2  
 SWH 10330.578 Hz  
 FIDRES 0.157632 Hz  
 AQ 3.1719923 sec  
 RG 4  
 DW 48.400 usec  
 DE 6.00 usec  
 TE 298.0 K  
 D1 1.00000000 sec  
 TDO 1

==== CHANNEL f1 =====  
 NUC1 1H  
 P1 9.60 usec  
 PL1 -6.00 dB  
 SFO1 500.3030896 MHz

F2 - Processing parameters  
 SI 32768  
 SF 500.3000000 MHz  
 WDW EM  
 SSB 0  
 LB 0.30 Hz  
 GB 0  
 PC 1.00

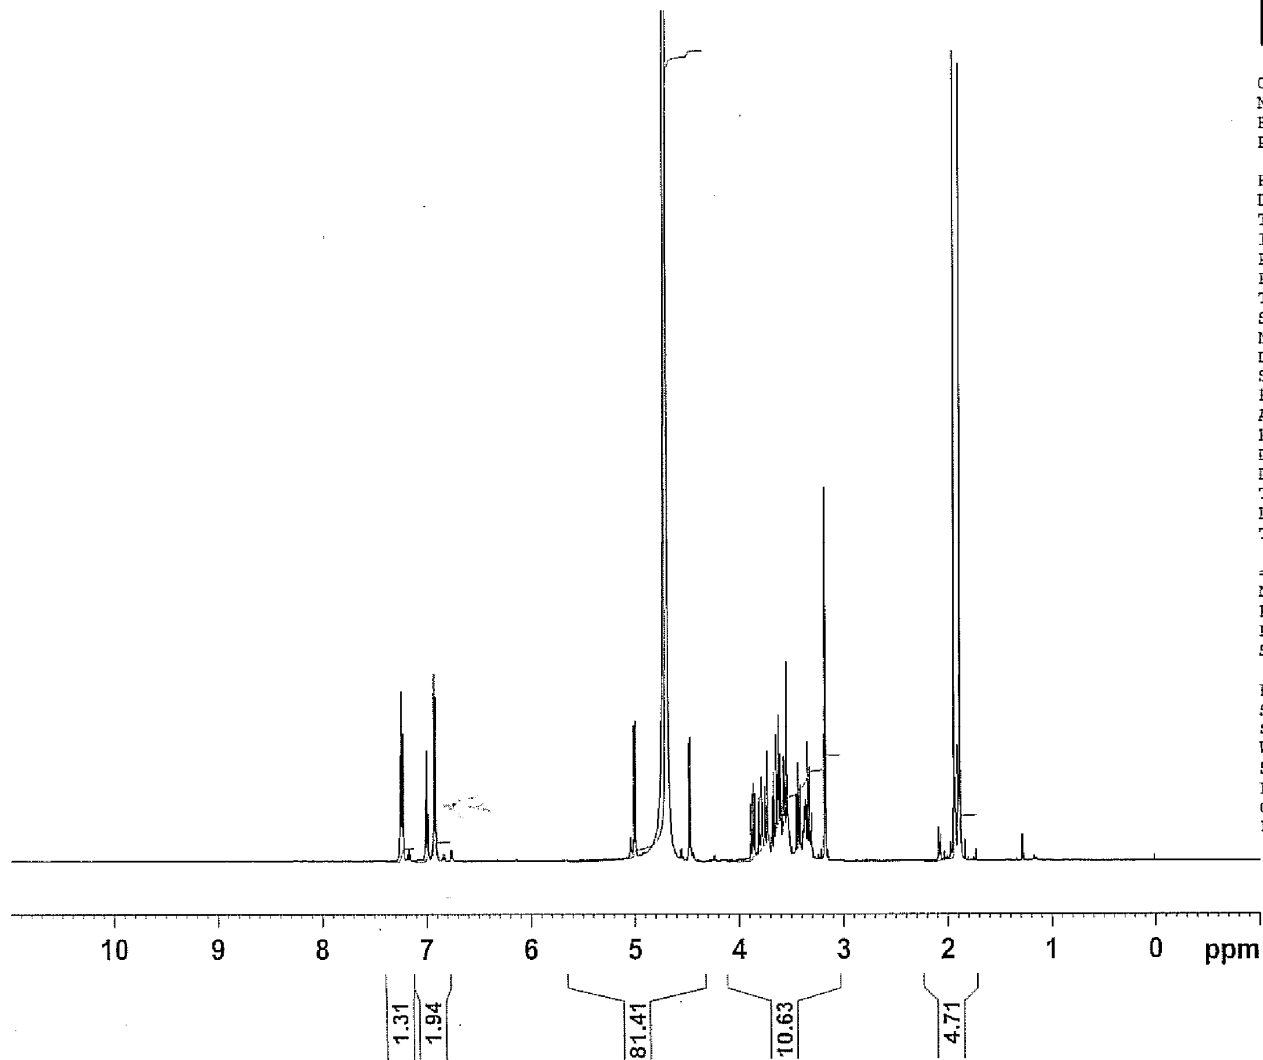

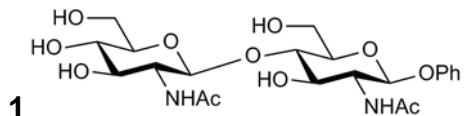

NMR@CHEM.OX

Current Data Parameters

NAME dg33722511  
 EXPNO 2  
 PROCNO 1

F2 - Acquisition Parameters

Date\_ 20051125  
 Time\_ 10.42  
 INSTRUM avc500  
 PROBHD 5 mm CPDUL 13C  
 PULPROG zgpg30  
 TD 65536  
 SOLVENT D2O  
 NS 256  
 DS 2  
 SWH 31250.000 Hz  
 FIDRES 0.476837 Hz  
 AQ 1.0486259 sec  
 RG 812  
 DW 16.000 usec  
 DE 20.00 usec  
 TE 298.0 K  
 D1 2.00000000 sec  
 d11 0.03000000 sec  
 DELTA 1.89999998 sec  
 TDO 1

===== CHANNEL f1 =====

NUC1 13C  
 P1 8.00 usec  
 PL1 -4.40 dB  
 SFO1 125.8131151 MHz

===== CHANNEL f2 =====

CPDPRG2 waltz16  
 NUC2 1H  
 PCPD2 80.00 usec  
 PL2 -6.00 dB  
 PL12 12.40 dB  
 PL13 17.00 dB  
 SFO2 500.3020012 MHz

F2 - Processing parameters

SI 32768  
 SF 125.8005350 MHz  
 WDW EM  
 SSB 0  
 LB 2.00 Hz  
 GB 0  
 PC 1.40

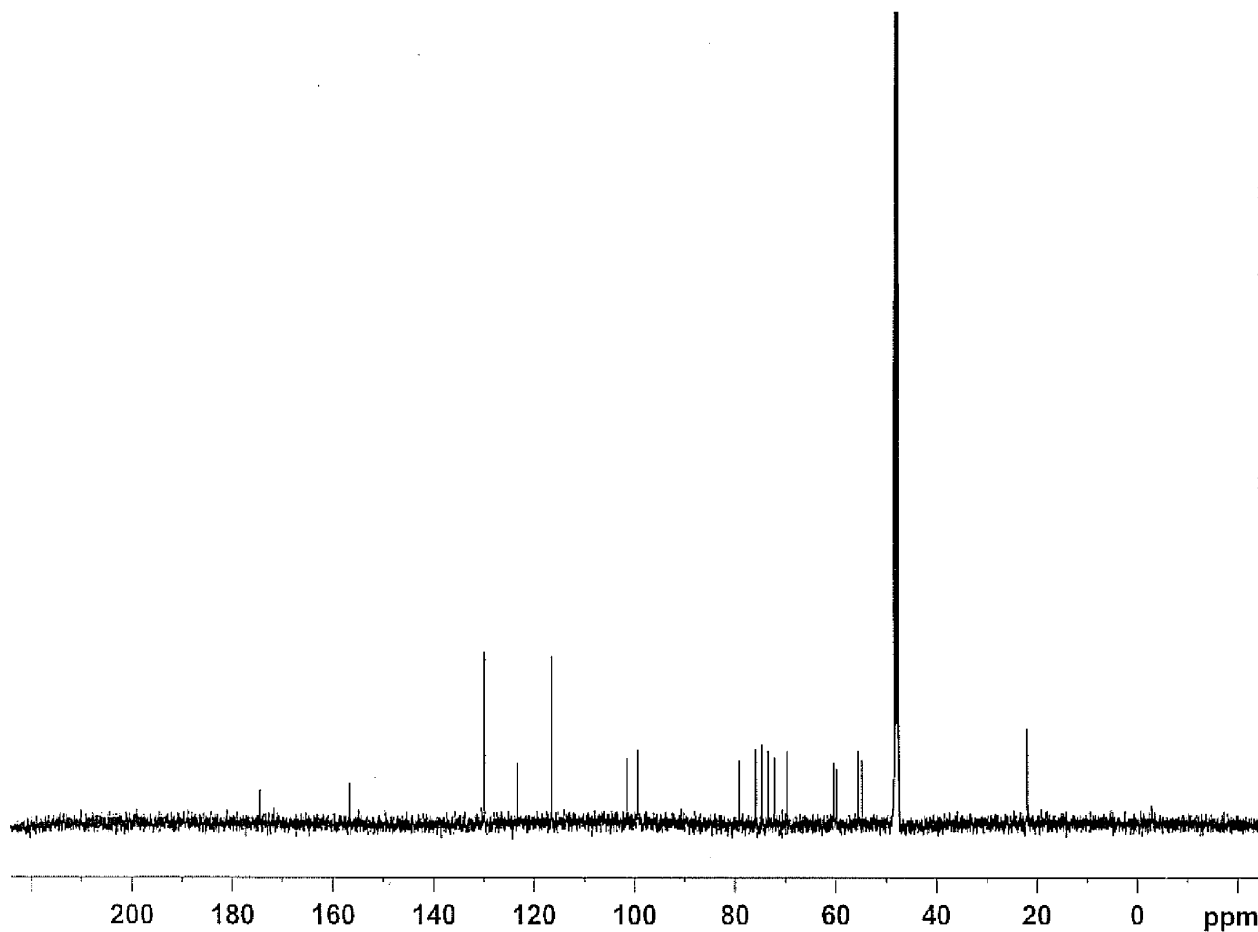

35

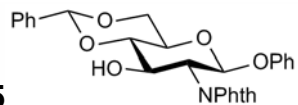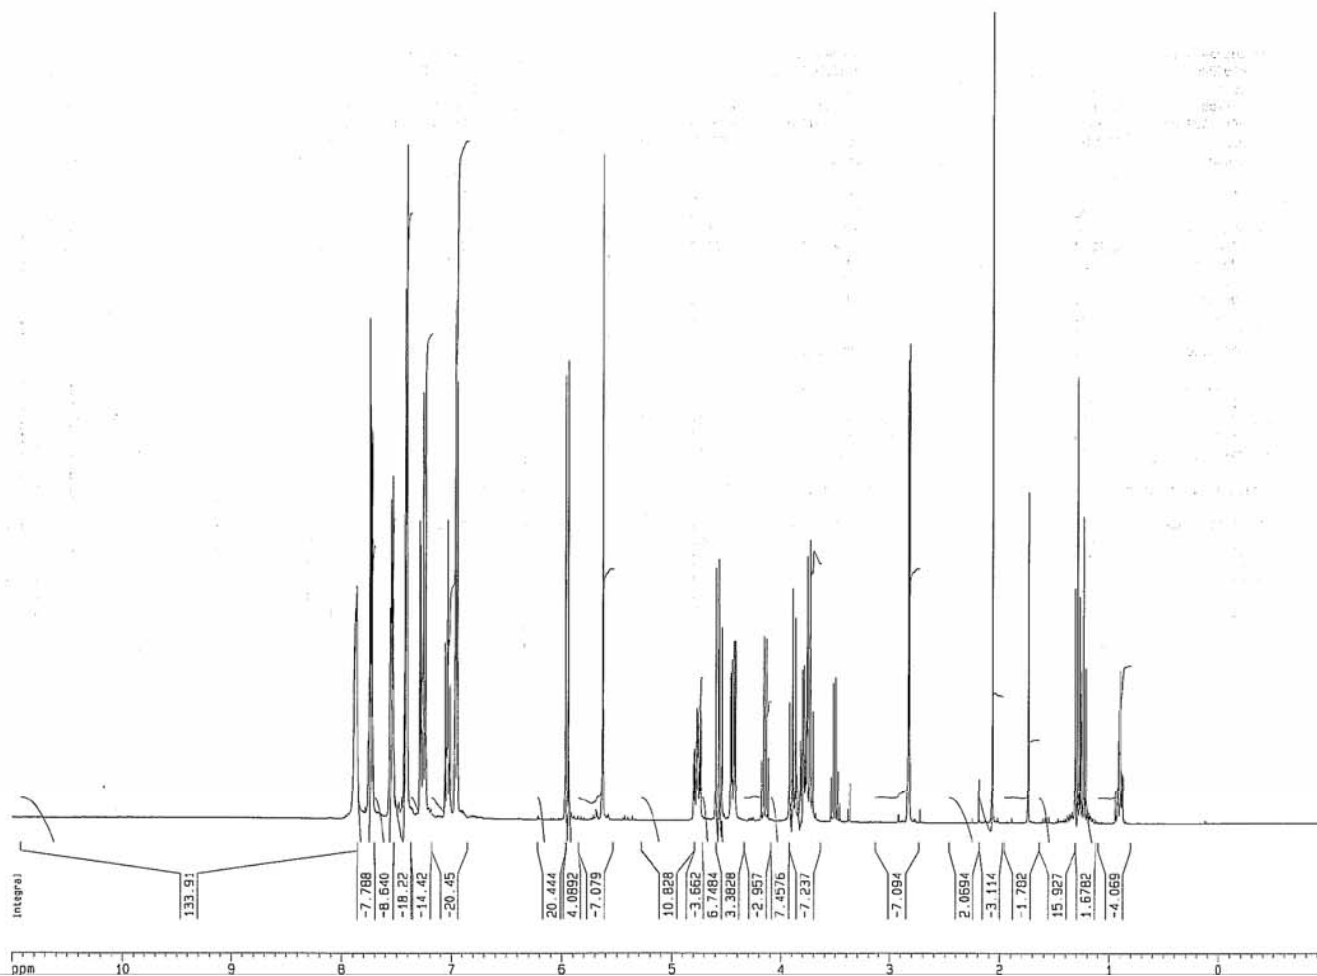

Current Data Parameters  
 NAME Jun14-2005  
 EXPNO 10  
 PROCNO 1

F2 - Acquisition Parameters  
 Date\_ 20050615  
 Time 4.29  
 INSTRUM dpx360  
 PROBHD 5mm DUAL 13C  
 PULPROG zg30  
 TD 65536  
 SOLVENT CDCl3  
 NS 16  
 DS 2  
 SWH 7440.476 Hz  
 FIDRES 0.113533 Hz  
 AQ 4.4040694 sec  
 RG 161.3  
 DW 67.200 usec  
 DE 6.00 usec  
 TE 300.0 K  
 D1 1.0000000 sec

----- CHANNEL f1 -----  
 NUC1 1H  
 P1 9.80 usec  
 PL1 -3.50 dB  
 SFO1 300.1322240 MHz

F2 - Processing parameters  
 SI 32768  
 SF 360.1300000 MHz  
 WDW EM  
 SSB 0  
 LB 0.30 Hz  
 GB 0  
 FC 1.00

1D NMR plot parameters  
 CX 30.00 cm  
 F1P 11.000 ppm  
 F1 3951.43 Hz  
 F2P -1.000 ppm  
 F2 -360.13 Hz  
 PPMCM 0.40000 ppm/cm  
 HZCM 144.05200 Hz/cm

35

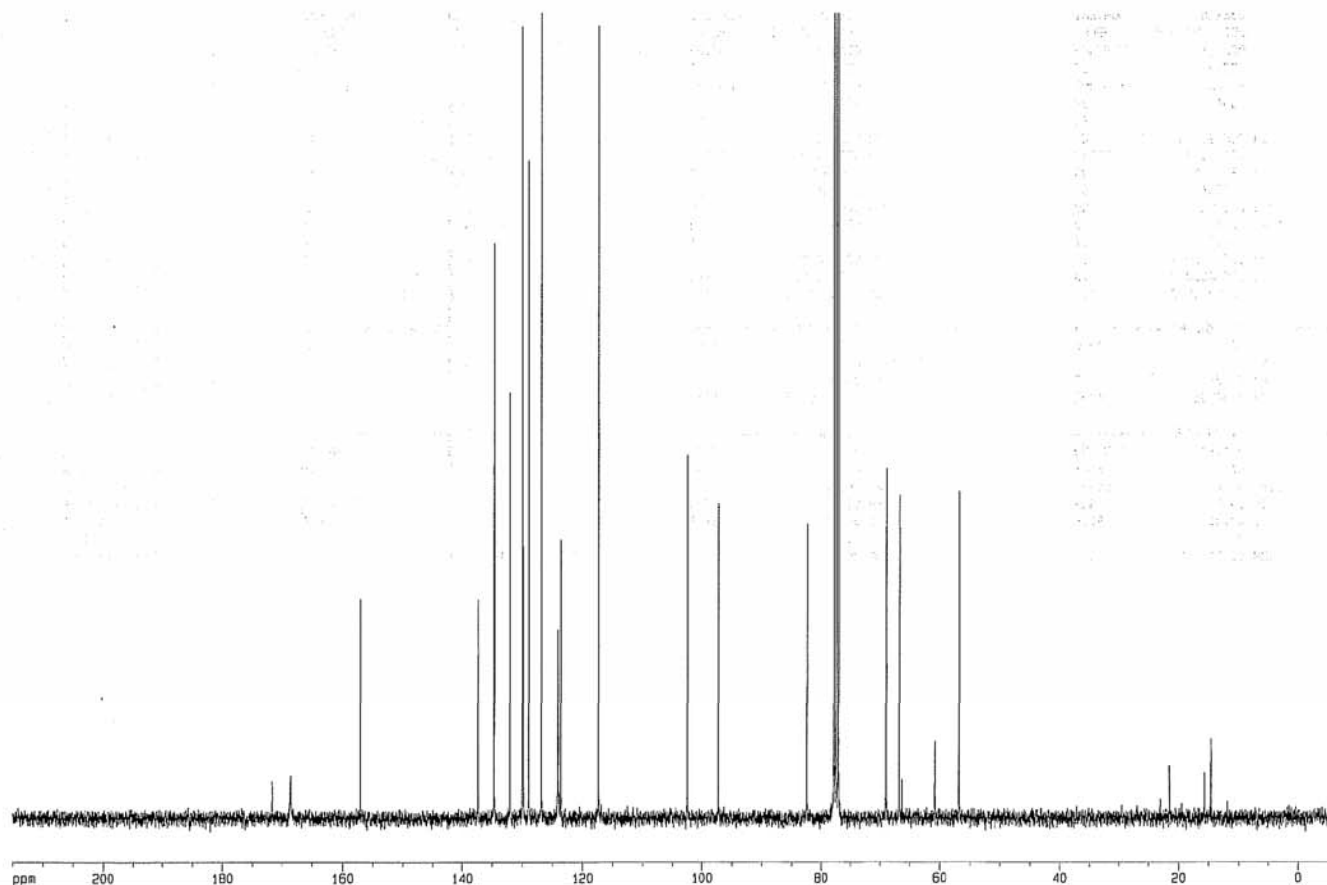

Current Data Parameters  
 NAME Jun14-2005  
 EXPNO 13  
 PROCNO 1

F2 - Acquisition Parameters  
 Date\_ 20050515  
 Time 5.52  
 INSTRUM dpx360  
 PROBHD 5mm DUAL 13C  
 PULPROG zgpg30  
 TD 65536  
 SOLVENT CDCl3  
 NS 1024  
 DS 4  
 SWH 22522.523 Hz  
 FIDRES 0.343666 Hz  
 AQ 1.4549491 sec  
 RG 11585.2  
 DW 22.200 usec  
 DE 6.00 usec  
 TE 300.0 K  
 D1 2.0000000 sec  
 d11 0.0300000 sec  
 d12 0.0002000 sec

\*\*\*\*\* CHANNEL f1 \*\*\*\*\*  
 NUC1 13C  
 P1 6.40 usec  
 PL1 -6.00 dB  
 SF01 90.5646855 MHz

\*\*\*\*\* CHANNEL f2 \*\*\*\*\*  
 CPDPRG2 waltz16  
 NUC2 1H  
 PCPD2 100.00 usec  
 PL2 -3.00 dB  
 PL12 10.00 dB  
 PL13 21.00 dB  
 SF02 360.1314405 MHz

F2 - Processing parameters  
 SI 32768  
 SF 90.5547250 MHz  
 WDW EM  
 SSB 0  
 LB 1.00 Hz  
 GB 0  
 PC 1.40

1D NMR plot parameters  
 CX 30.00 cm  
 F1P 215.000 ppm  
 F1 19469.27 Hz  
 F2P -5.000 ppm  
 F2 -452.77 Hz  
 PPMCM 7.33333 ppm/cm  
 HZCM 664.06799 Hz/cm

36

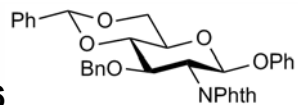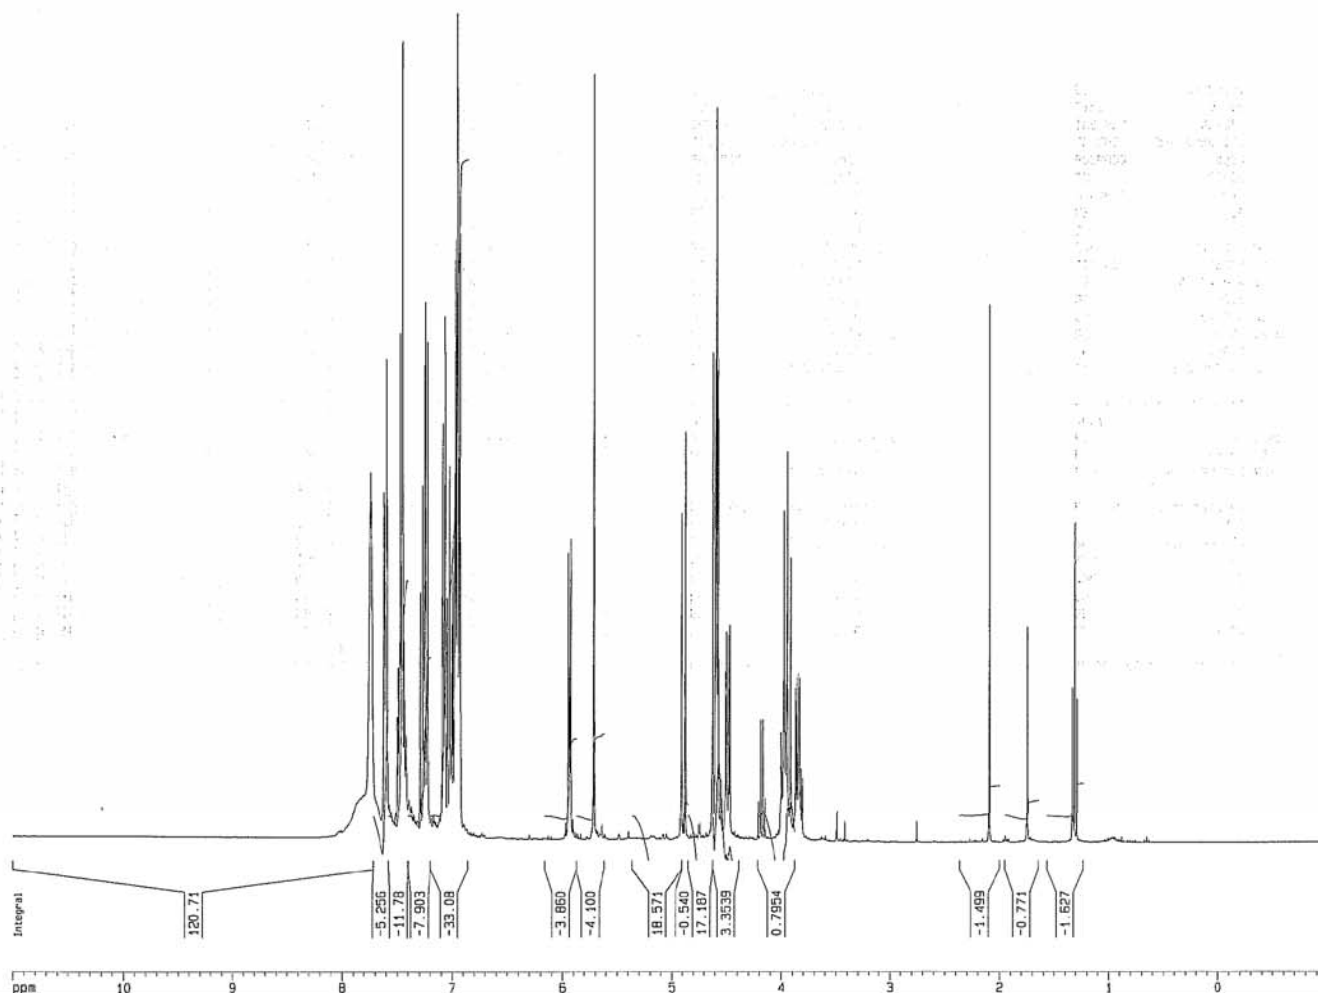

Current Data Parameters  
 NAME Jun21-2005  
 EXPNO 10  
 PROCNO 1

F2 - Acquisition Parameters  
 Date\_ 20050621  
 Time 20.05  
 INSTRUM dpx360  
 PROBHD 5mm DUAL 13C  
 PULPROG zg30  
 TD 65536  
 SOLVENT CDCl3  
 NS 16  
 DS 2  
 SWH 7440.476 Hz  
 FIDRES 0.113533 Hz  
 AQ 4.4040694 sec  
 RG 90.5  
 DW 67.200 usec  
 DE 6.00 usec  
 TE 300.0 K  
 D1 1.00000000 sec

----- CHANNEL f1 -----  
 NUC1 1H  
 P1 9.80 usec  
 PL1 -3.50 dB  
 SFO1 360.1322240 MHz

F2 - Processing parameters  
 SI 32768  
 SF 360.1300000 MHz  
 WDW EM  
 SSB 0  
 LB 0.30 Hz  
 GB 0  
 PC 1.00

1D NMR plot parameters  
 CX 30.00 cm  
 F1P 11.000 ppm  
 F1 3961.43 Hz  
 F2P -1.000 ppm  
 F2 -360.13 Hz  
 PPMCM 0.40000 ppm/cm  
 HZCM 144.05200 Hz/cm

36

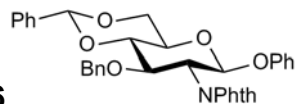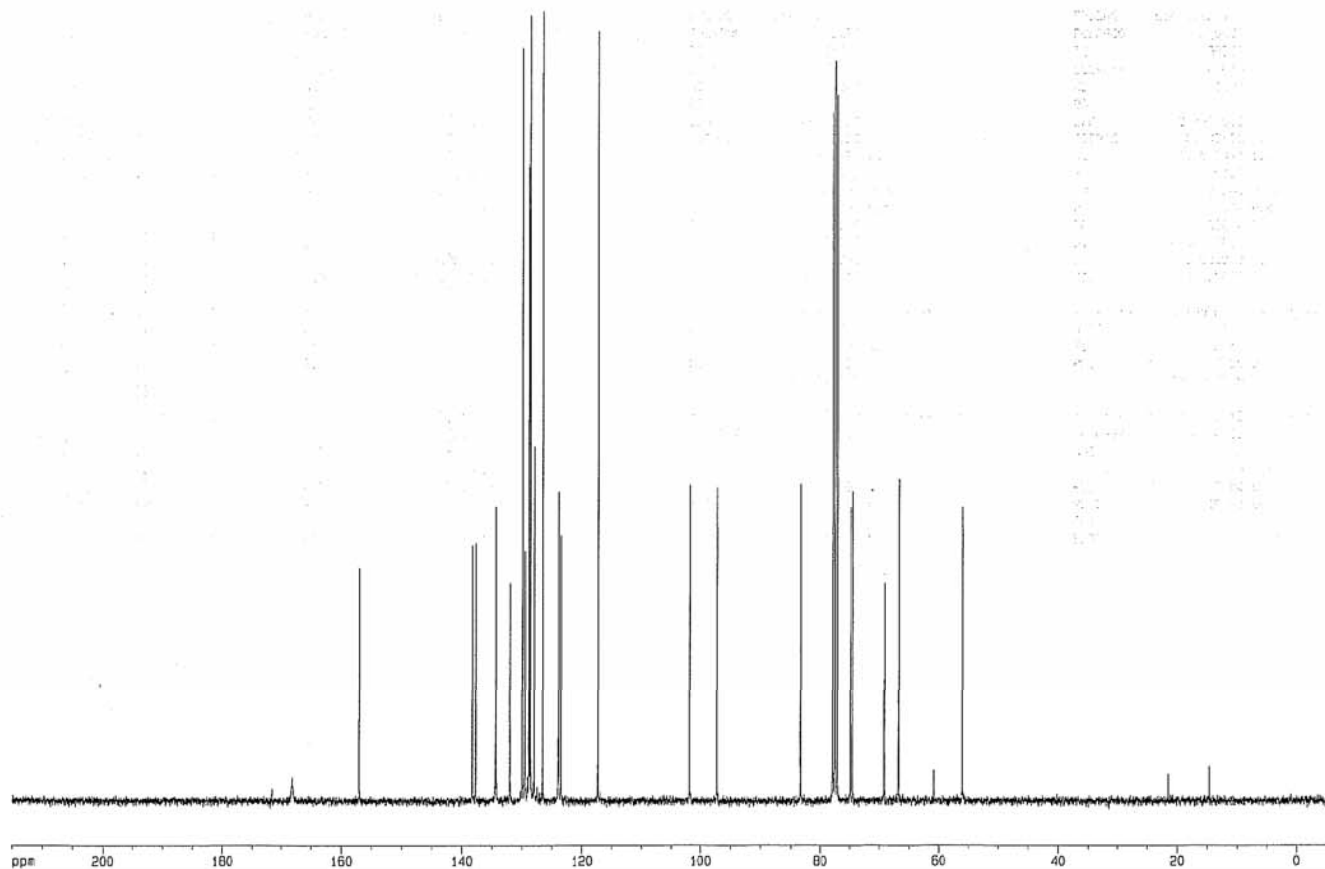

## Current Data Parameters

NAME Jun21-2005  
EXPNO 13  
PROCNO 1

## F2 - Acquisition Parameters

Date\_ 20050621  
Time 21.35  
INSTRUM dpx360  
PROBHD 5mm DUAL 13C  
PULPROG zgpg30  
TD 65536  
SOLVENT CDCl3  
NS 1024  
DS 4  
SWH 22522.523 Hz  
FIDRES 0.343566 Hz  
AQ 1.4549491 sec  
RG 8192  
DM 22.200 usec  
DE 6.00 usec  
TE 300.0 K  
D1 2.00000000 sec  
d11 0.03000000 sec  
d12 0.00020000 sec

## ----- CHANNEL f1 -----

NUC1 13C  
P1 6.40 usec  
PL1 -6.00 dB  
SFO1 90.5646855 MHz

## ----- CHANNEL f2 -----

CPDPRG2 waltz16  
NUC2 1H  
PCPD2 100.00 usec  
PL2 -3.00 dB  
PL12 18.00 dB  
PL13 21.00 dB  
SFO2 360.1314405 MHz

## F2 - Processing parameters

SI 32768  
SF 90.5547250 MHz  
NDW EM  
SSB 0  
LB 1.00 Hz  
GB 0  
PC 1.40

## ID NMR plot parameters

CX 30.00 cm  
F1P 215.000 ppm  
F1 19469.27 Hz  
F2P -5.000 ppm  
F2 -452.77 Hz  
PPMCM 7.33333 ppm/cm  
HZCM 664.06799 Hz/cm

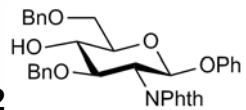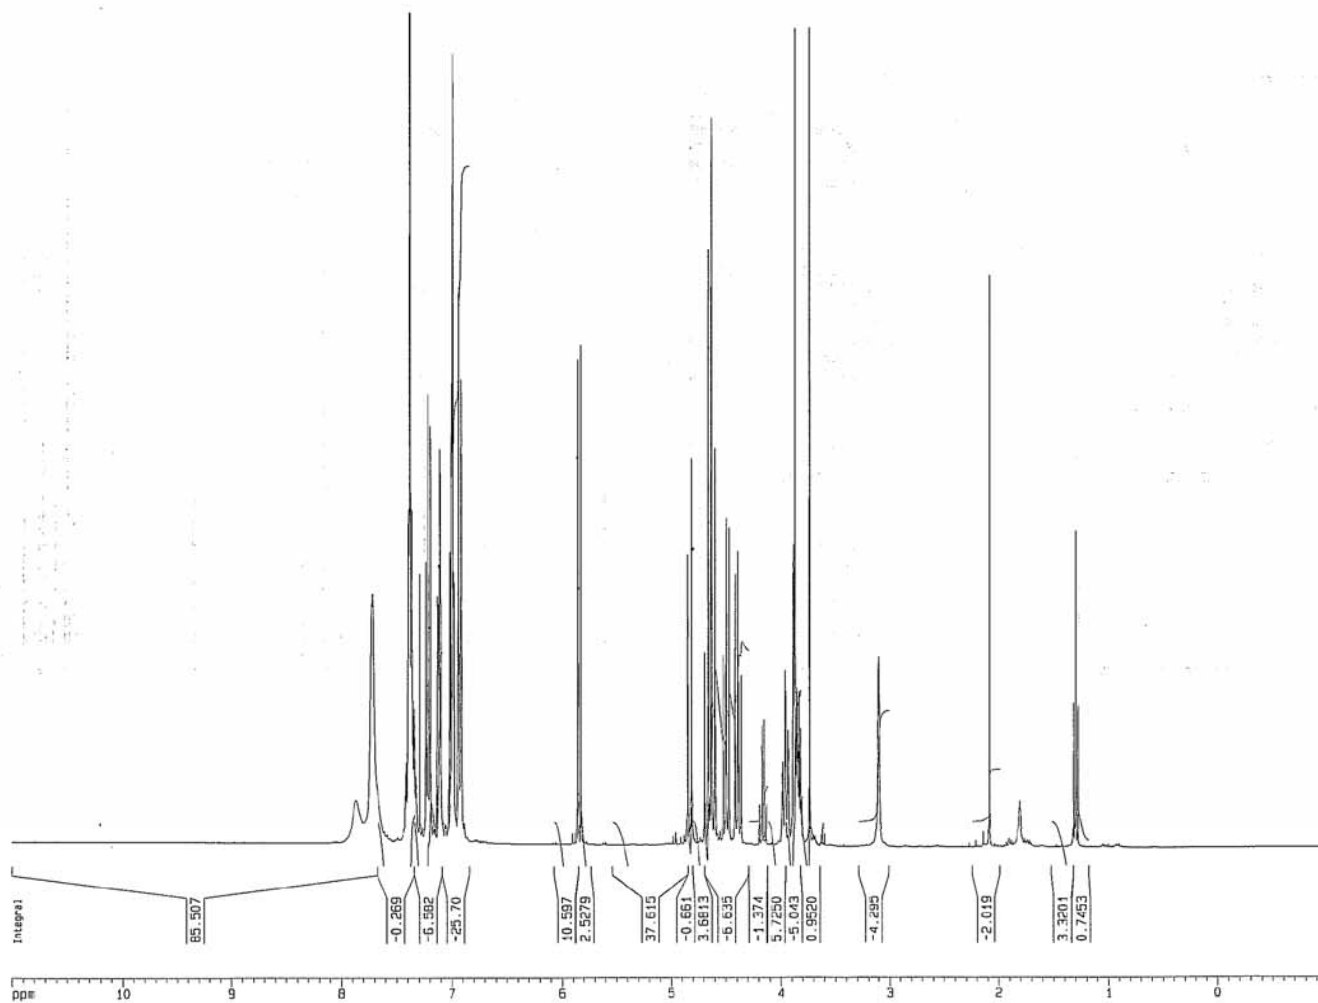

Current Data Parameters  
 NAME Jun30-2005  
 EXPNO 10  
 PROCNO 1

F2 - Acquisition Parameters  
 Date\_ 20050701  
 Time 2.50  
 INSTRUM dpx360  
 PROBHD 5mm DUAL 13C  
 PULPROG zg30  
 TD 65536  
 SOLVENT CDCl3  
 NS 16  
 DS 2  
 SWH 7440.476 Hz  
 FIDRES 0.113533 Hz  
 AQ 4.4040594 sec  
 RG 114  
 DW 67.200 usec  
 DE 6.00 usec  
 TE 300.0 K  
 D1 1.00000000 sec

----- CHANNEL f1 -----  
 NUC1 1H  
 P1 9.80 usec  
 PL1 -3.50 dB  
 SFO1 360.1322240 MHz

F2 - Processing parameters  
 SI 32768  
 SF 360.1300000 MHz  
 WDW EM  
 SSB 0  
 LB 0.30 Hz  
 GB 0  
 PC 1.00

1D NMR plot parameters  
 CX 30.00 cm  
 F1P 11.000 ppm  
 F1 3961.43 Hz  
 F2P -1.000 ppm  
 F2 -360.13 Hz  
 PPMCM 0.40000 ppm/cm  
 HZCM 144.05200 Hz/cm



12

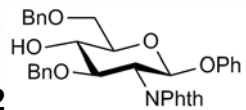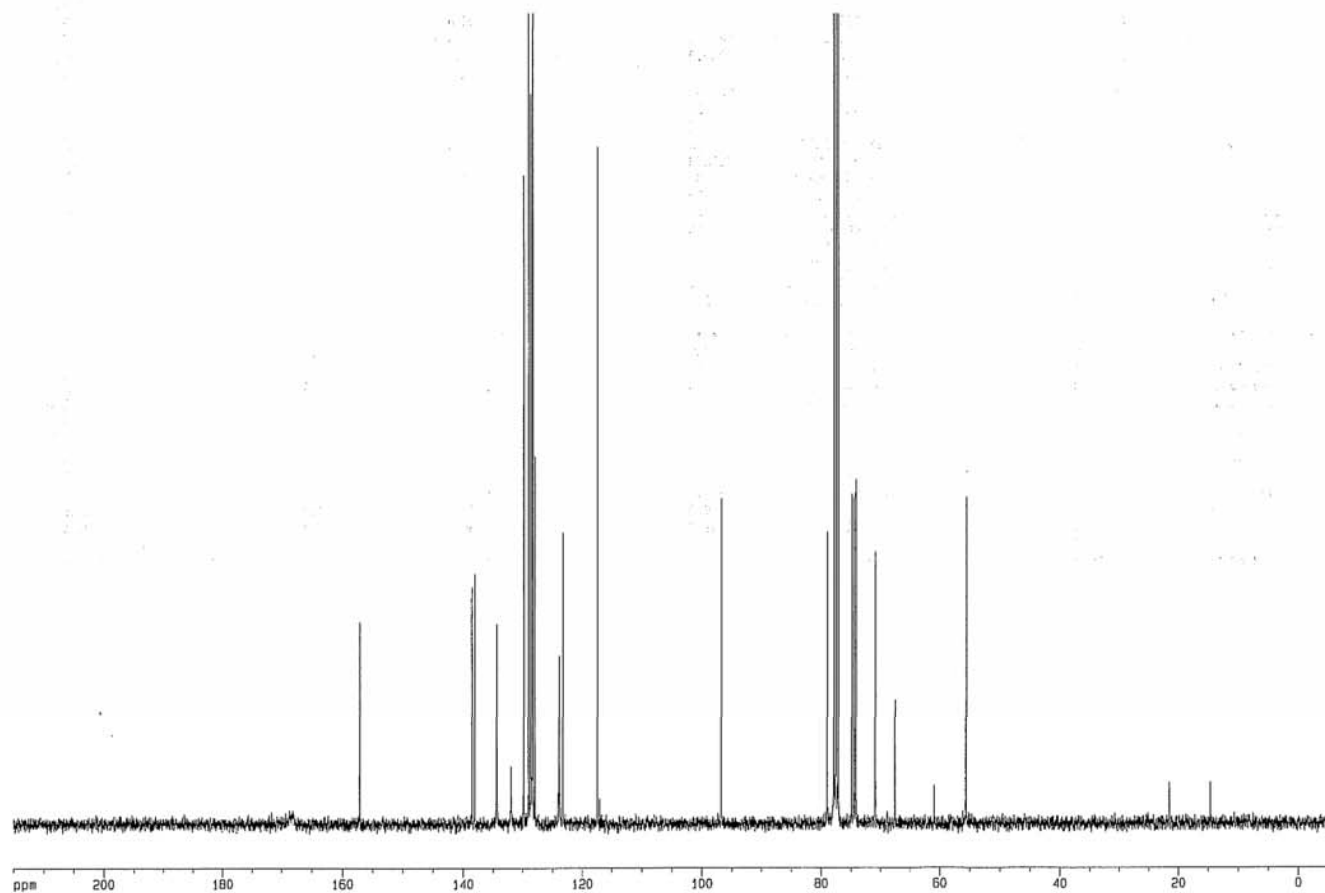

Current Data Parameters  
 NAME Jun30-2005  
 EXPNO 13  
 PROCNO 1

F2 - Acquisition Parameters  
 Date\_ 20050701  
 Time 4.12  
 INSTRUM dpx360  
 PROBHD 5mm QUAL 13C  
 PULPROG zgpg30  
 TD 65536  
 SOLVENT COC13  
 NS 1024  
 DS 4  
 SWH 22522.523 Hz  
 FIDRES 0.343666 Hz  
 AQ 1.4549491 sec  
 RG 11585.2  
 DW 22.200 usec  
 DE 6.00 usec  
 TE 300.0 K  
 D1 2.0000000 sec  
 d11 0.0300000 sec  
 d12 0.0002000 sec

===== CHANNEL f1 =====  
 NUC1 13C  
 P1 6.40 usec  
 PL1 -6.00 dB  
 SFO1 90.5646855 MHz

===== CHANNEL f2 =====  
 CPDPRG2 waltz16  
 NUC2 1H  
 PCPD2 100.00 usec  
 PL2 -3.00 dB  
 PL12 18.00 dB  
 PL13 21.00 dB  
 SFO2 360.1314405 MHz

F2 - Processing parameters  
 S1 32768  
 SF 90.5547250 MHz  
 WDW EM  
 SSB 0  
 LB 1.00 Hz  
 GB 0  
 PC 1.40

1D NMR plot parameters  
 CX 30.00 cm  
 F1P 215.000 ppm  
 F1 19469.27 Hz  
 F2P -5.000 ppm  
 F2 -452.77 Hz  
 PPMCM 7.33333 ppm/cm  
 HZCM 664.06799 Hz/cm

13

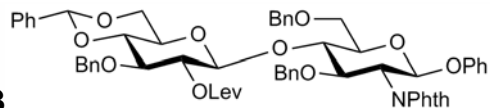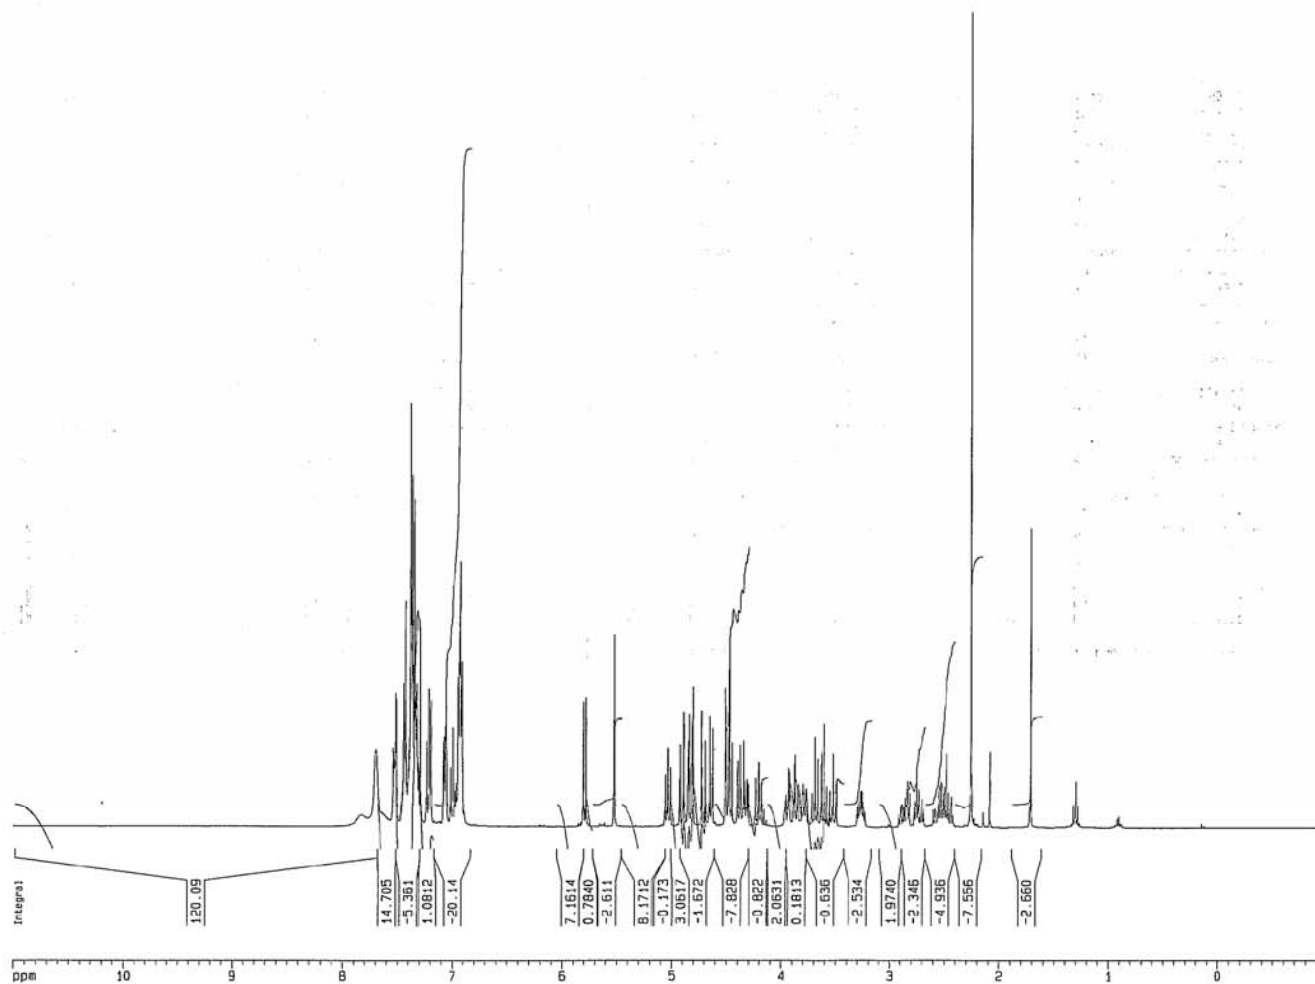

## Current Data Parameters

NAME Aug31-2005  
EXPNO 10  
PROCNO 1

## F2 - Acquisition Parameters

Date\_ 20050831  
Time 20.05  
INSTRUM dpx360  
PROBHD 5mm DUAL 13C  
PULPROG zg30  
TD 65536  
SOLVENT CDCl3  
NS 16  
DS 2  
SWH 7440.476 Hz  
FIDRES 0.113533 Hz  
AQ 4.4040694 sec  
RG 143.7  
DM 67.200 usec  
DE 6.00 usec  
TE 300.0 K  
D1 1.00000000 sec

## \*\*\*\*\* CHANNEL f1 \*\*\*\*\*

NUC1 1H  
P1 9.80 usec  
PL1 -3.50 dB  
SFO1 360.1322240 MHz

## F2 - Processing parameters

SI 32768  
SF 360.1300000 MHz  
WDW EM  
SSB 0  
LB 0.30 Hz  
GB 0  
PC 1.00

## 1D NMR plot parameters

CX 30.00 cm  
F1P 11.000 ppm  
F1 3961.43 Hz  
F2P -1.000 ppm  
F2 -360.13 Hz  
PPMCM 0.40000 ppm/cm  
HZCM 144.05200 Hz/cm

13

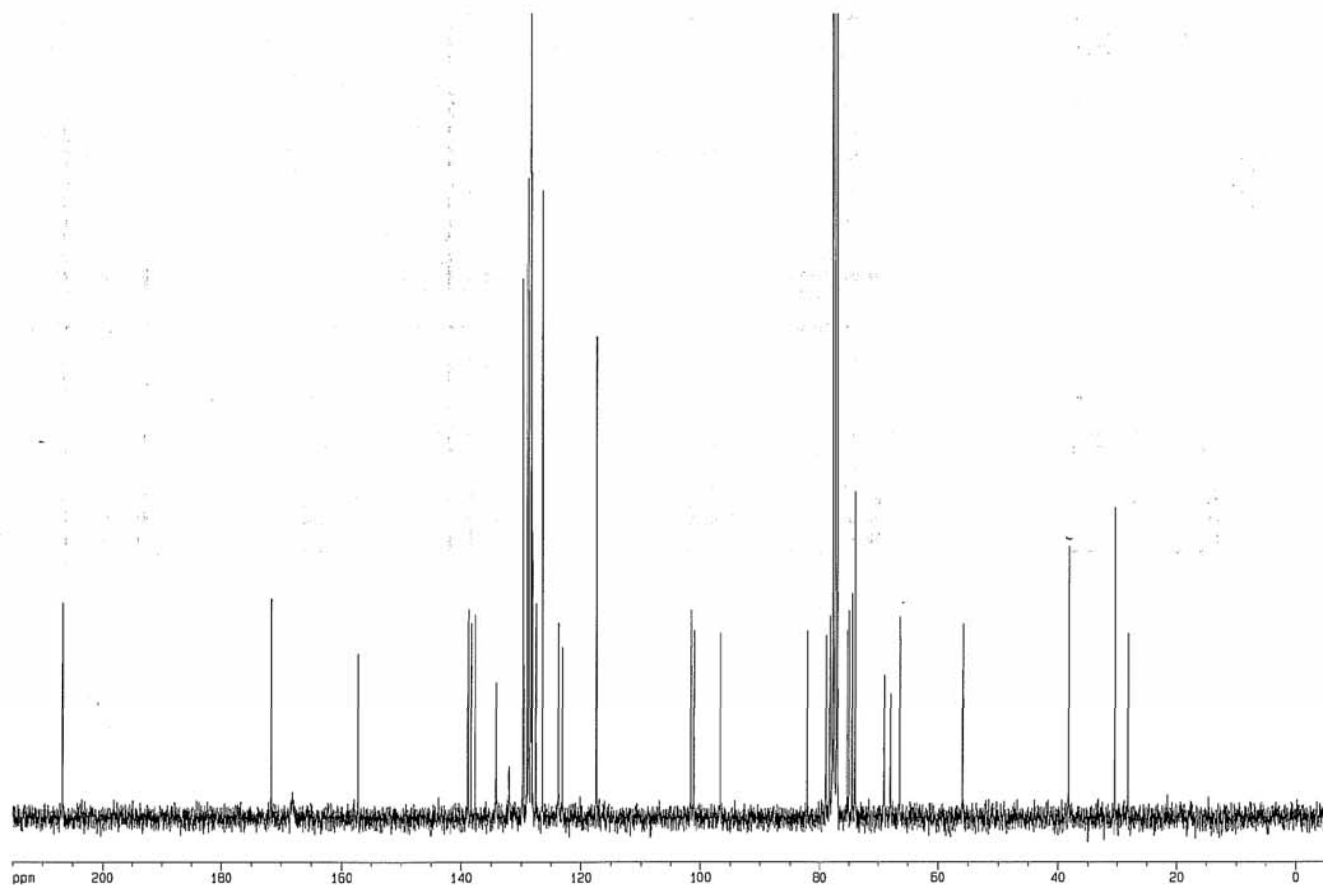

## Current Data Parameters

NAME Aug31-2005  
EXPNO 13  
PROCNO 1

## F2 - Acquisition Parameters

Date\_ 20050831  
Time 21.41  
INSTRUM dpx360  
PROBHD 5mm DUAL 13C  
PULPROG zgpg30  
TD 65536  
SOLVENT CDC13  
NS 1024  
DS 4  
SWH 22522.523 Hz  
FIDRES 0.343666 Hz  
AQ 1.4549491 sec  
RG 16384  
DW 22.200 usec  
DE 6.00 usec  
TE 300.0 K  
D1 2.0000000 sec  
d11 0.0300000 sec  
d12 0.0002000 sec

## ----- CHANNEL f1 -----

NUC1 13C  
P1 6.40 usec  
PL1 -6.00 dB  
SFO1 90.5646955 MHz

## ----- CHANNEL f2 -----

CPOPRG2 waltz16  
NUC2 1H  
PCPD2 100.00 usec  
PL2 -3.00 dB  
PL12 18.00 dB  
PL13 21.00 dB  
SFO2 360.1314405 MHz

## F2 - Processing parameters

SI 32768  
SF 90.5547250 MHz  
WDW EM  
SSB 0  
LB 1.00 Hz  
GB 0  
PC 1.40

## 1D NMR plot parameters

CX 30.00 cm  
F1P 215.000 ppm  
F1 19469.27 Hz  
F2P -5.000 ppm  
F2 -452.77 Hz  
PPMCM 7.33333 ppm/cm  
HZCM 664.06799 Hz/cm

37

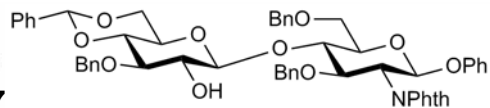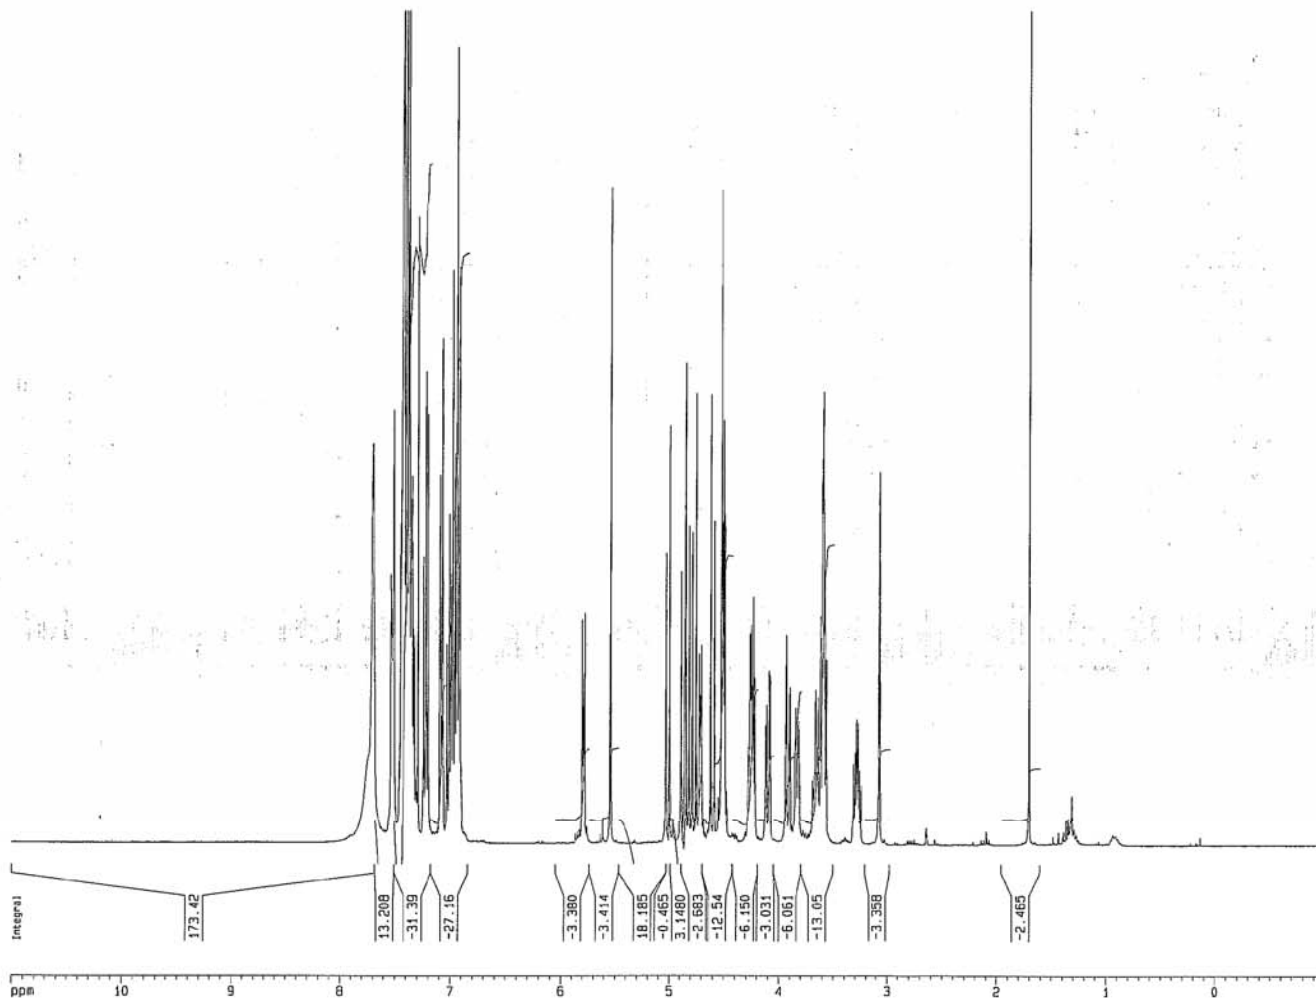

Current Data Parameters  
 NAME Sep07-2005  
 EXPNO 20  
 PROCNO 1

F2 - Acquisition Parameters  
 Date\_ 20050907  
 Time 21.18  
 INSTRUM dpx360  
 PROBHD 5mm DUAL 13C  
 PULPROG zg30  
 TD 65536  
 SOLVENT CDC13  
 NS 16  
 DS 2  
 SWH 7440.476 Hz  
 FIDRES 0.113533 Hz  
 AQ 4.4040694 sec  
 RG 114  
 DW 67.200 usec  
 DE 6.00 usec  
 TE 300.0 K  
 D1 1.00000000 sec

----- CHANNEL f1 -----  
 NUC1 1H  
 P1 9.80 usec  
 PL1 -3.50 dB  
 SFO1 360.1322240 MHz

F2 - Processing parameters  
 SI 32768  
 SF 360.1300000 MHz  
 WDW EM  
 SSB 0  
 LB 0.30 Hz  
 GB 0  
 PC 1.00

1D NMR plot parameters  
 CX 30.00 cm  
 F1P 11.000 ppm  
 F1 3961.43 Hz  
 F2P -1.000 ppm  
 F2 -360.13 Hz  
 PPMCM 0.40000 ppm/cm  
 HZCM 144.05200 Hz/cm

37

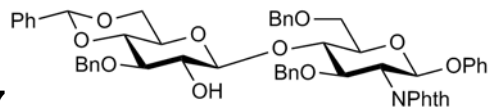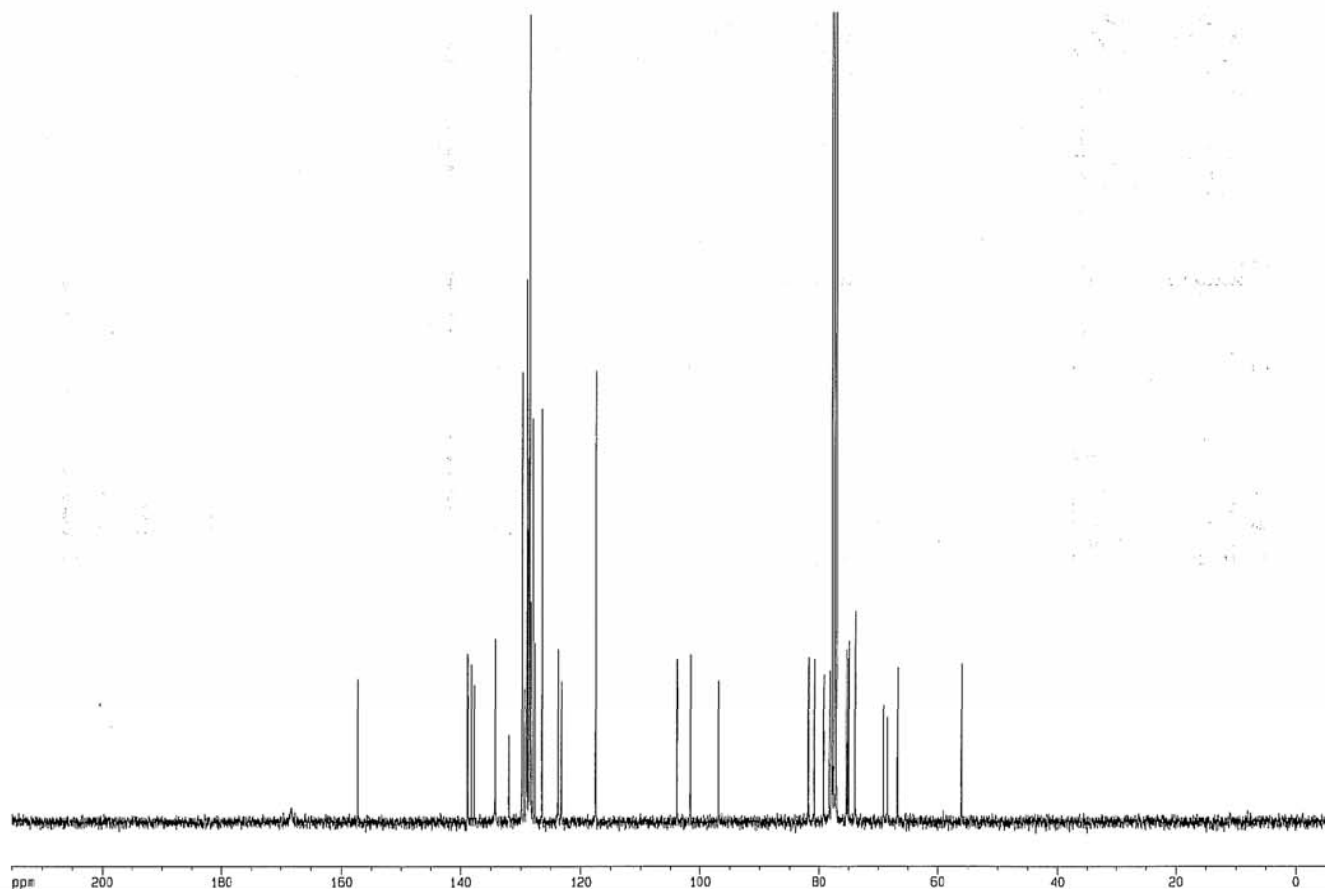

Current Data Parameters  
 NAME Sep07-2005  
 EXPNO 24  
 PROCNO 1

F2 - Acquisition Parameters  
 Date\_ 20050907  
 Time 23.04  
 INSTRUM dpx360  
 PROBHD 5mm QNAL 13C  
 PULPROG zgpg30  
 TD 65536  
 SOLVENT CDCl3  
 NS 1024  
 DS 4  
 SWH 22522.523 Hz  
 FIDRES 0.343666 Hz  
 AQ 1.4549491 sec  
 RG 11585.2  
 DW 22.200 usec  
 DE 6.00 usec  
 TE 300.0 K  
 O1 2.0000000 sec  
 d11 0.0300000 sec  
 d12 0.0002000 sec

----- CHANNEL f1 -----  
 NUC1 13C  
 P1 6.40 usec  
 PL1 -6.00 dB  
 SFO1 90.5646855 MHz

----- CHANNEL f2 -----  
 CPDPRG2 waltz16  
 NUC2 1H  
 PCPD2 100.00 usec  
 PL2 -3.00 dB  
 PL12 18.00 dB  
 PL13 21.00 dB  
 SFO2 360.1314405 MHz

F2 - Processing parameters  
 SI 32768  
 SF 90.5547250 MHz  
 WDW EM  
 SSB 0  
 LB 1.00 Hz  
 GB 0  
 PC 1.40

1D NMR plot parameters  
 CX 30.00 cm  
 F1P 215.000 ppm  
 F1 19469.27 Hz  
 F2P -5.000 ppm  
 F2 -452.77 Hz  
 PPMCM 7.33333 ppm/cm  
 HZCM 664.06799 Hz/cm

14

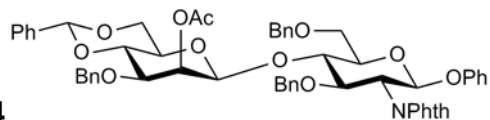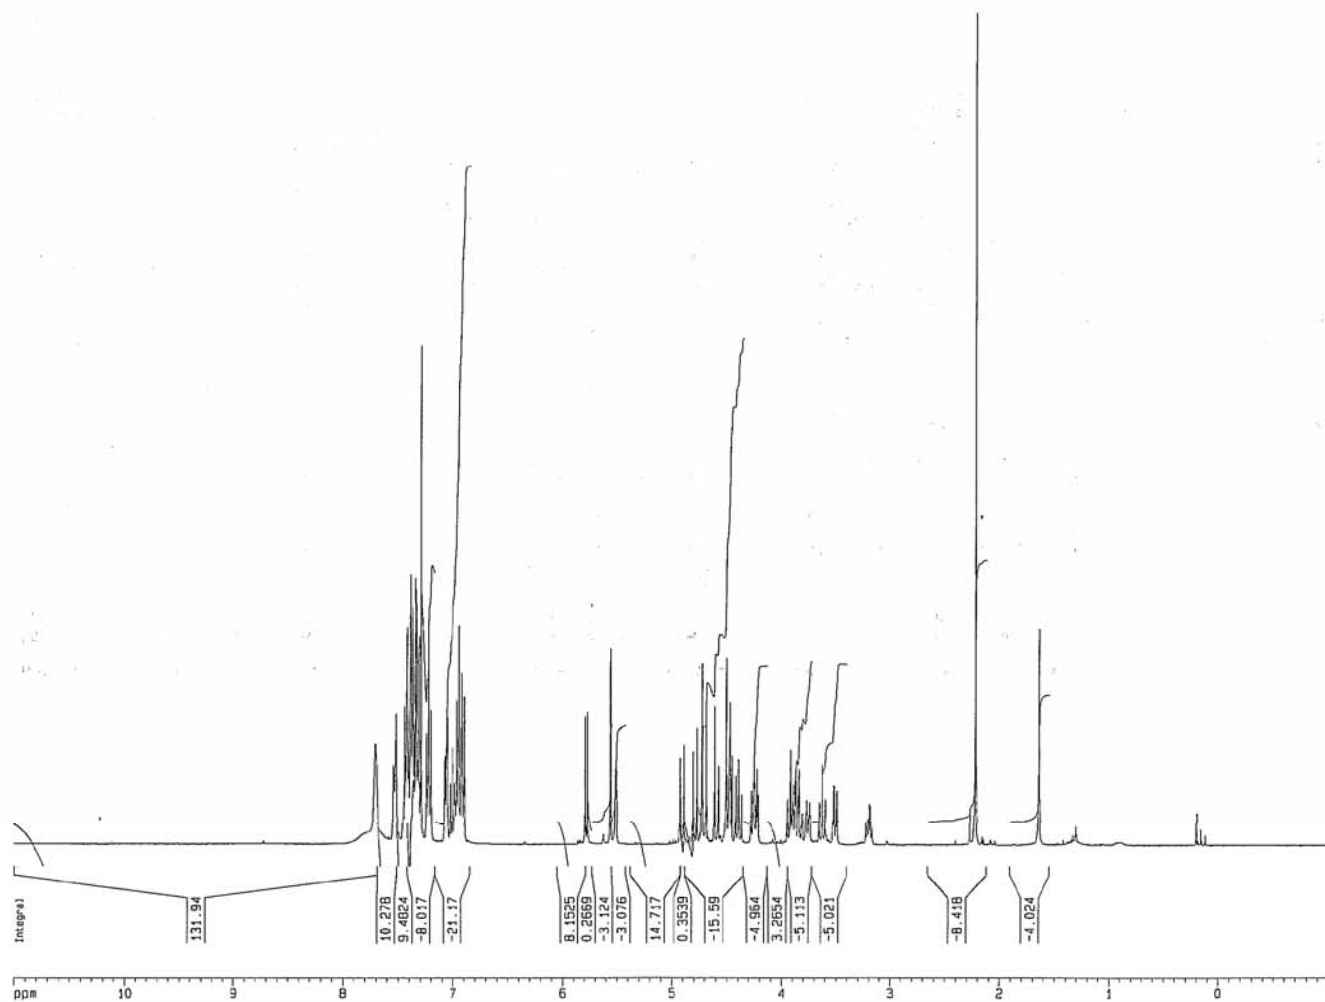

## Current Data Parameters

NAME Sep07-2005  
EXPNO 30  
PROCNO 1

## F2 - Acquisition Parameters

Date\_ 20050907  
Time 23.25  
INSTRUM dpx360  
PROBHD 5mm DUAL 13C  
PULPROG zg30  
TD 65536  
SOLVENT CDCl3  
NS 16  
DS 2  
SWH 7440.476 Hz  
FIDRES 0.113533 Hz  
AQ 4.4040694 sec  
RG 203.2  
DN 67.200 usec  
DE 6.00 usec  
TE 300.0 K  
D1 1.00000000 sec

## ===== CHANNEL f1 =====

NUC1 1H  
P1 9.60 usec  
PL1 -3.50 dB  
SFO1 360.1322240 MHz

## F2 - Processing parameters

SI 32768  
SF 360.1300000 MHz  
WDW EM  
SSB 0  
LB 0.30 Hz  
GB 0  
PC 1.00

## 1D NMR plot parameters

CX 30.00 cm  
F1P 11.000 ppm  
F1 3961.43 Hz  
F2P -1.000 ppm  
F2 -360.13 Hz  
PPNCH 0.40000 ppm/cm  
HZCM 144.05200 Hz/cm

14

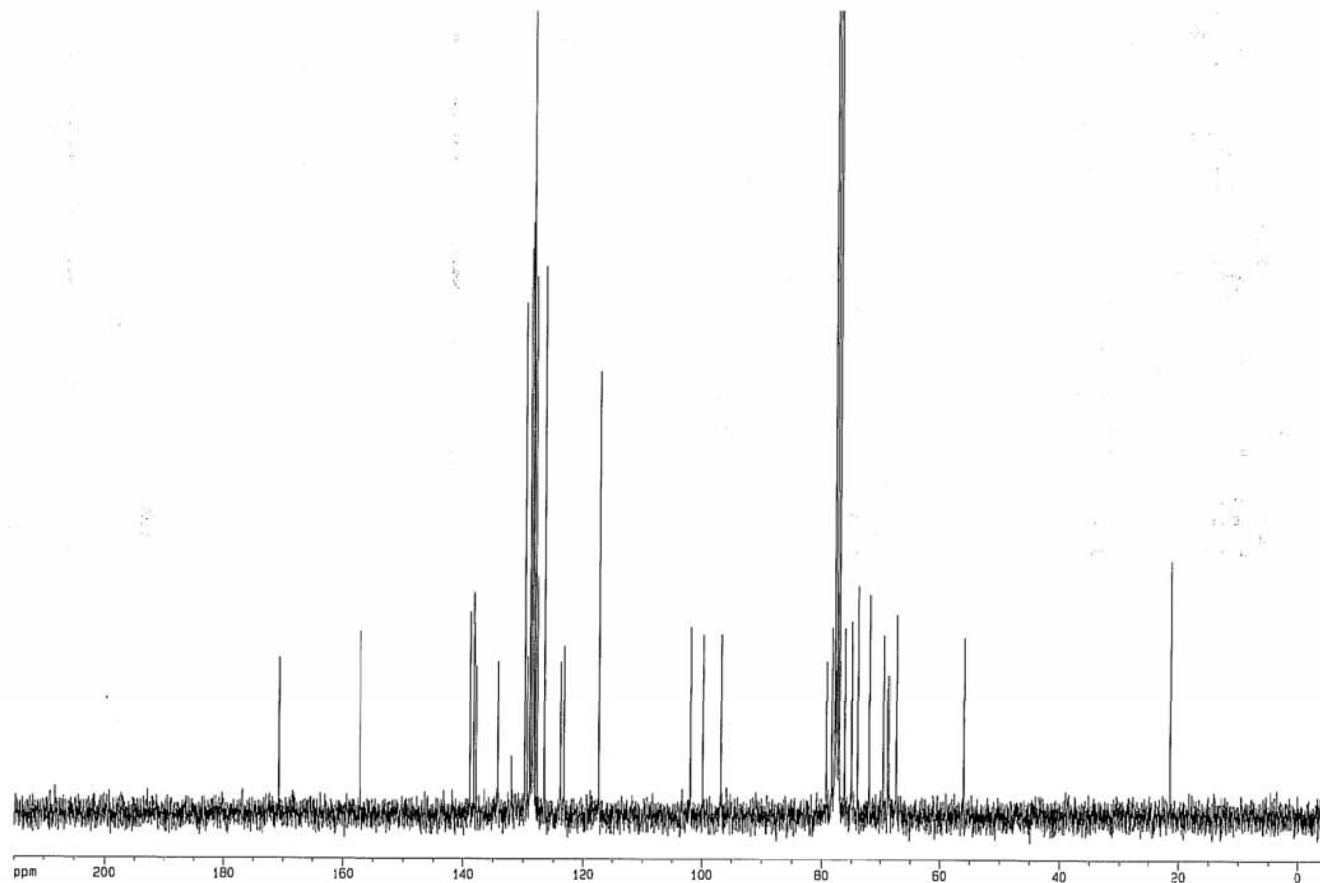

Current Data Parameters  
 NAME Sep07-2005  
 EXPNO 34  
 PROCNO 1

F2 - Acquisition Parameters  
 Date\_ 20050908  
 Time 1.24  
 INSTRUM dpx360  
 PROBHD 5mm DUAL 13C  
 PULPROG zgpg30  
 TD 65536  
 SOLVENT CDCl3  
 NS 1024  
 DS 4  
 SWH 22522.523 Hz  
 FIDRES 0.343666 Hz  
 AQ 1.4549491 sec  
 RG 11585.2  
 DM 22.200 usec  
 DE 6.00 usec  
 TE 300.0 K  
 D1 2.0000000 sec  
 d11 0.0300000 sec  
 d12 0.00002000 sec

===== CHANNEL f1 =====  
 NUC1 13C  
 P1 6.40 usec  
 PL1 -6.00 dB  
 SFO1 90.5646855 MHz

===== CHANNEL f2 =====  
 CPDPRG2 waltz16  
 NUC2 1H  
 PCPD2 100.00 usec  
 PL2 -3.00 dB  
 PL12 18.00 dB  
 PL13 21.00 dB  
 SFO2 360.1314405 MHz

F2 - Processing parameters  
 SI 32768  
 SF 90.5647250 MHz  
 WDM EM  
 SSB 0  
 LB 1.00 Hz  
 GB 0  
 PC 1.40

1D NMR plot parameters  
 CX 30.00 cm  
 F1P 215.000 ppm  
 F1 19469.27 Hz  
 F2P -5.000 ppm  
 F2 -452.77 Hz  
 PPMCM 7.33333 ppm/cm  
 HZCM 654.06799 Hz/cm

38

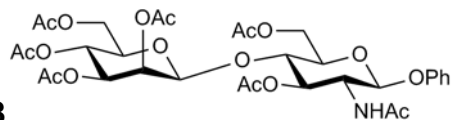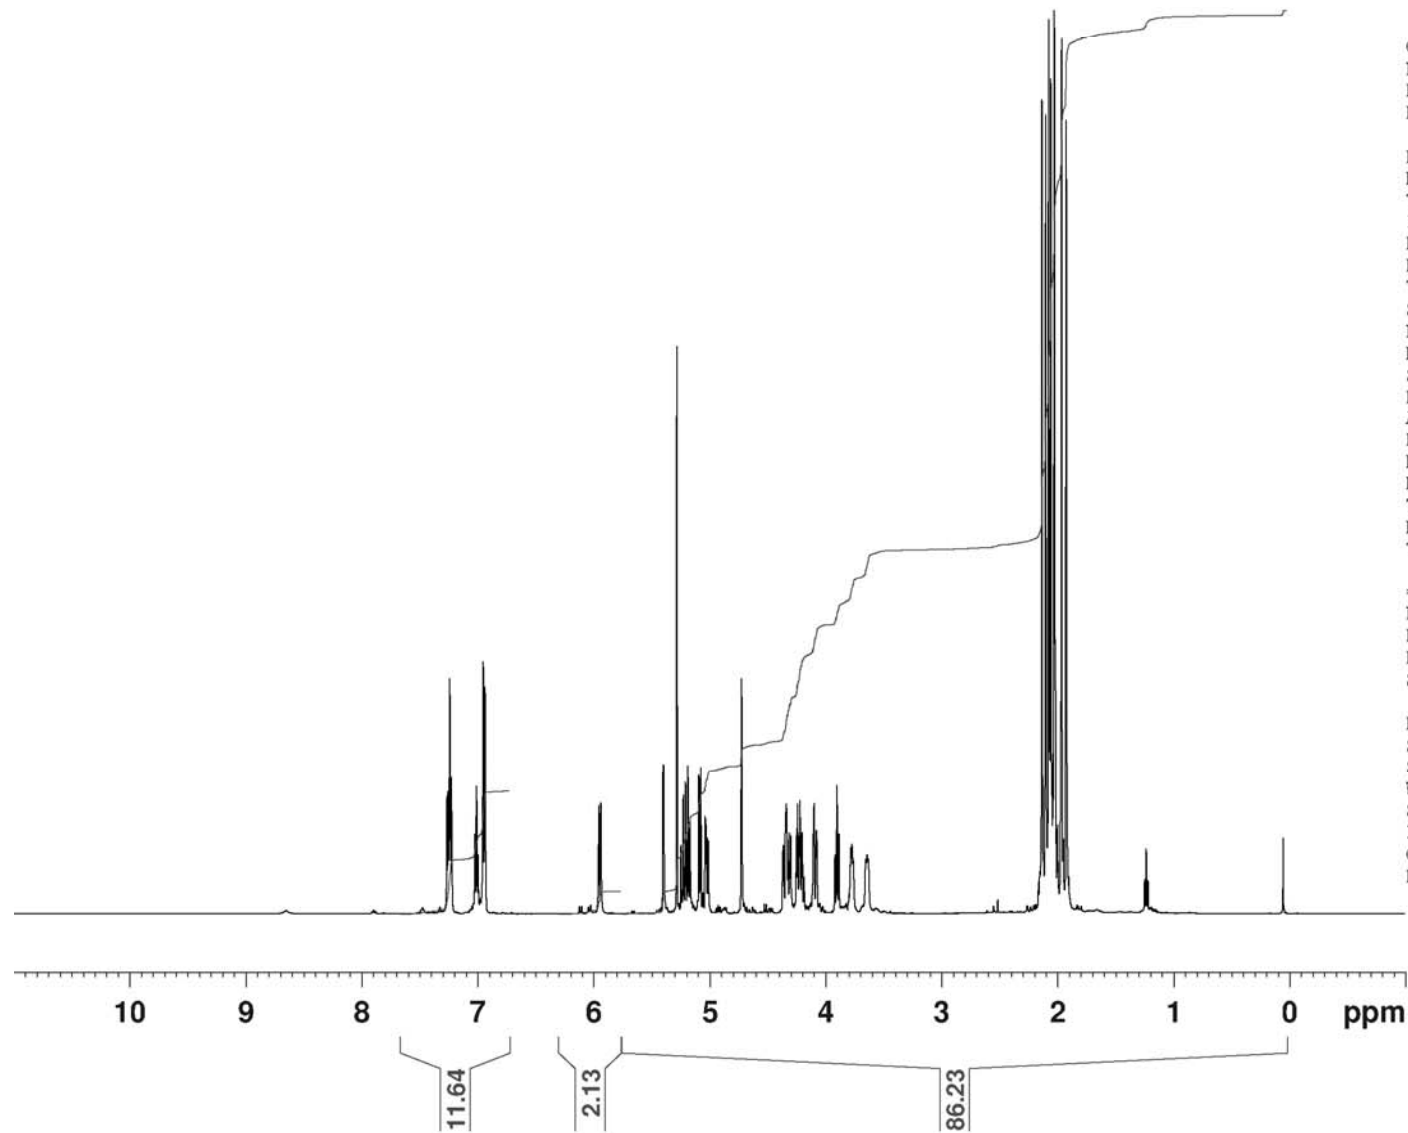

Current Data Parameters  
 NAME dg30500410  
 EXPNO 1  
 PROCNO 1

F2 - Acquisition Parameters  
 Date\_ 20051004  
 Time 12.34  
 INSTRUM avc500  
 PROBHD 5 mm CPDUL 13C  
 PULPROG zg30  
 TD 65536  
 SOLVENT CDCl3  
 NS 16  
 DS 2  
 SWH 10330.578 Hz  
 FIDRES 0.157632 Hz  
 AQ 3.1719923 sec  
 RG 4  
 DW 48.400 usec  
 DE 6.00 usec  
 TE 298.0 K  
 D1 1.00000000 sec  
 TD0 1

===== CHANNEL f1 =====  
 NUC1 1H  
 P1 9.60 usec  
 PL1 -6.00 dB  
 SFO1 500.3030896 MHz

F2 - Processing parameters  
 SI 32768  
 SF 500.3000240 MHz  
 WDW EM  
 SSB 0  
 LB 0.30 Hz  
 GB 0  
 PC 1.00



38



Current Data Parameters  
 NAME dg30500410  
 EXPNO 3  
 PROCNO 1

F2 - Acquisition Parameters  
 Date\_ 20051004  
 Time\_ 12.53  
 INSTRUM avc500  
 PROBHD 5 mm CPDUL 13C  
 PULPROG zgpg30  
 TD 65536  
 SOLVENT CDCl3  
 NS 256  
 DS 2  
 SWH 31250.000 Hz  
 FIDRES 0.476837 Hz  
 AQ 1.0486259 sec  
 RG 1620  
 DW 16.000 usec  
 DE 20.00 usec  
 TE 298.0 K  
 D1 2.00000000 sec  
 d11 0.03000000 sec  
 DELTA 1.89999998 sec  
 TD0 1

==== CHANNEL f1 =====  
 NUC1 13C  
 P1 8.00 usec  
 PL1 -4.40 dB  
 SFO1 125.8131151 MHz

==== CHANNEL f2 =====  
 CPDPRC2 waltz16  
 NUC2 1H  
 PCPD2 80.00 usec  
 PL2 -6.00 dB  
 PL12 12.40 dB  
 PL13 17.00 dB  
 SFO2 500.3020012 MHz

F2 - Processing parameters  
 SI 32768  
 SF 125.8005438 MHz  
 WDW EM  
 SSB 0  
 LB 1.00 Hz  
 GB 0  
 PC 1.40

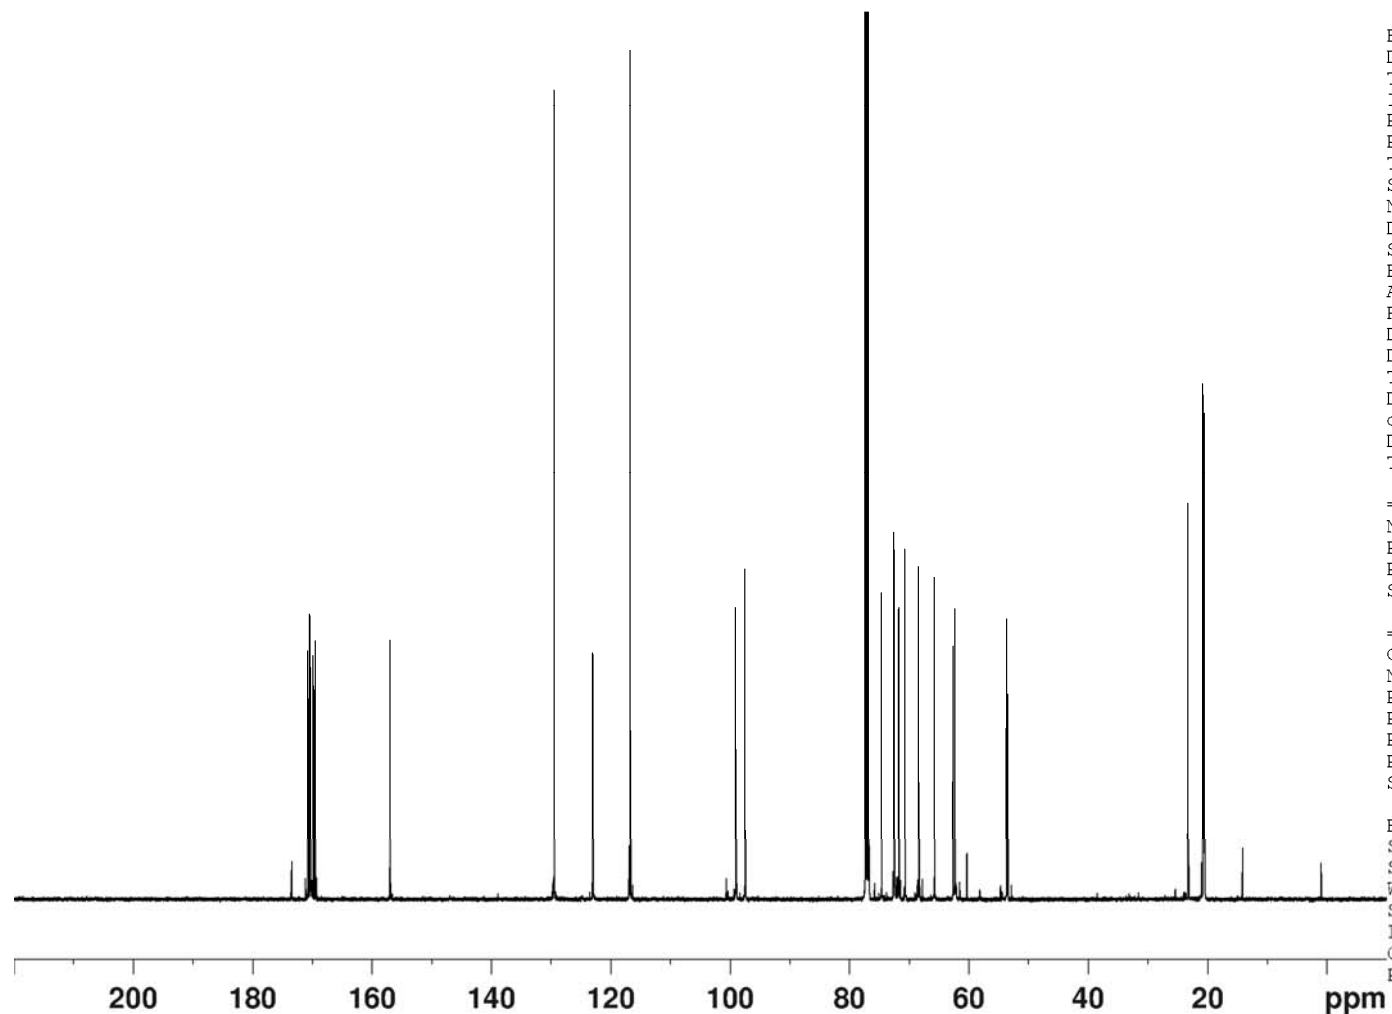

|                               |                      |                          |                                                                        |                               |                      |
|-------------------------------|----------------------|--------------------------|------------------------------------------------------------------------|-------------------------------|----------------------|
| <b>Acquisition Time (sec)</b> | 3.1719               | <b>Comment</b>           | Instrument AVC500 D P GAMBLIN 3409 30/11/05                            | <b>Date</b>                   | 01 Dec 2005 12:37:20 |
| <b>Date Stamp</b>             | 01 Dec 2005 12:37:20 | <b>File Name</b>         | \\CHEM-DS4\VICTORIA\LAB10\CONOR\AA_DAVE_NMR\2_DG34093011\15\PDATA\1\1R |                               |                      |
| <b>Frequency (MHz)</b>        | 500.30               | <b>Nucleus</b>           | 1H                                                                     | <b>Number of Transients</b>   | 9                    |
| <b>Original Points Count</b>  | 32768                | <b>Owner</b>             | dp-nmrgroup                                                            | <b>Points Count</b>           | 32768                |
| <b>Receiver Gain</b>          | 5.00                 | <b>SW(cyclical) (Hz)</b> | 10330.58                                                               | <b>Solvent</b>                | DEUTERIUM OXIDE      |
| <b>Spectrum Offset (Hz)</b>   | 3089.5557            | <b>Spectrum Type</b>     | STANDARD                                                               | <b>Sweep Width (Hz)</b>       | 10330.26             |
|                               |                      |                          |                                                                        | <b>Temperature (degree C)</b> | 24.970               |

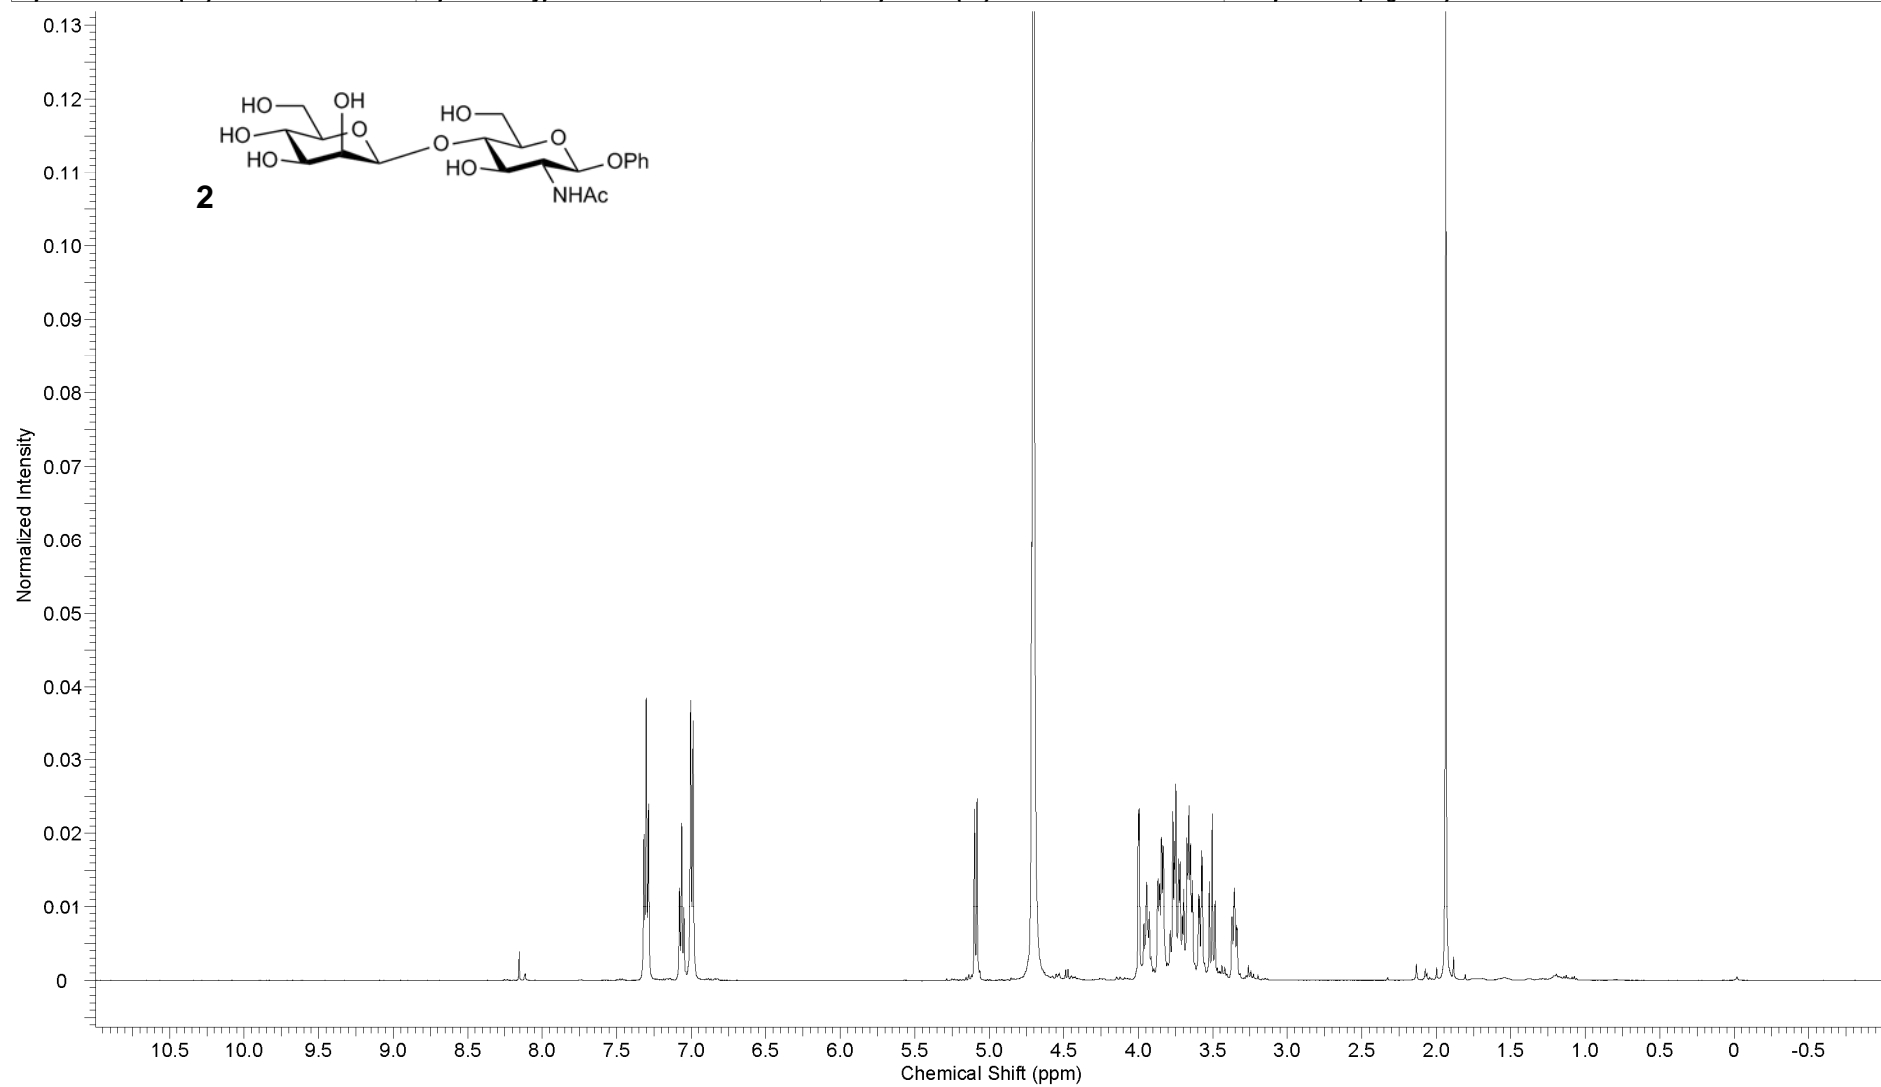

2

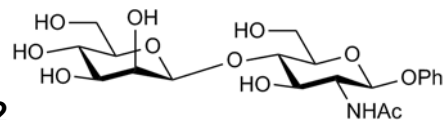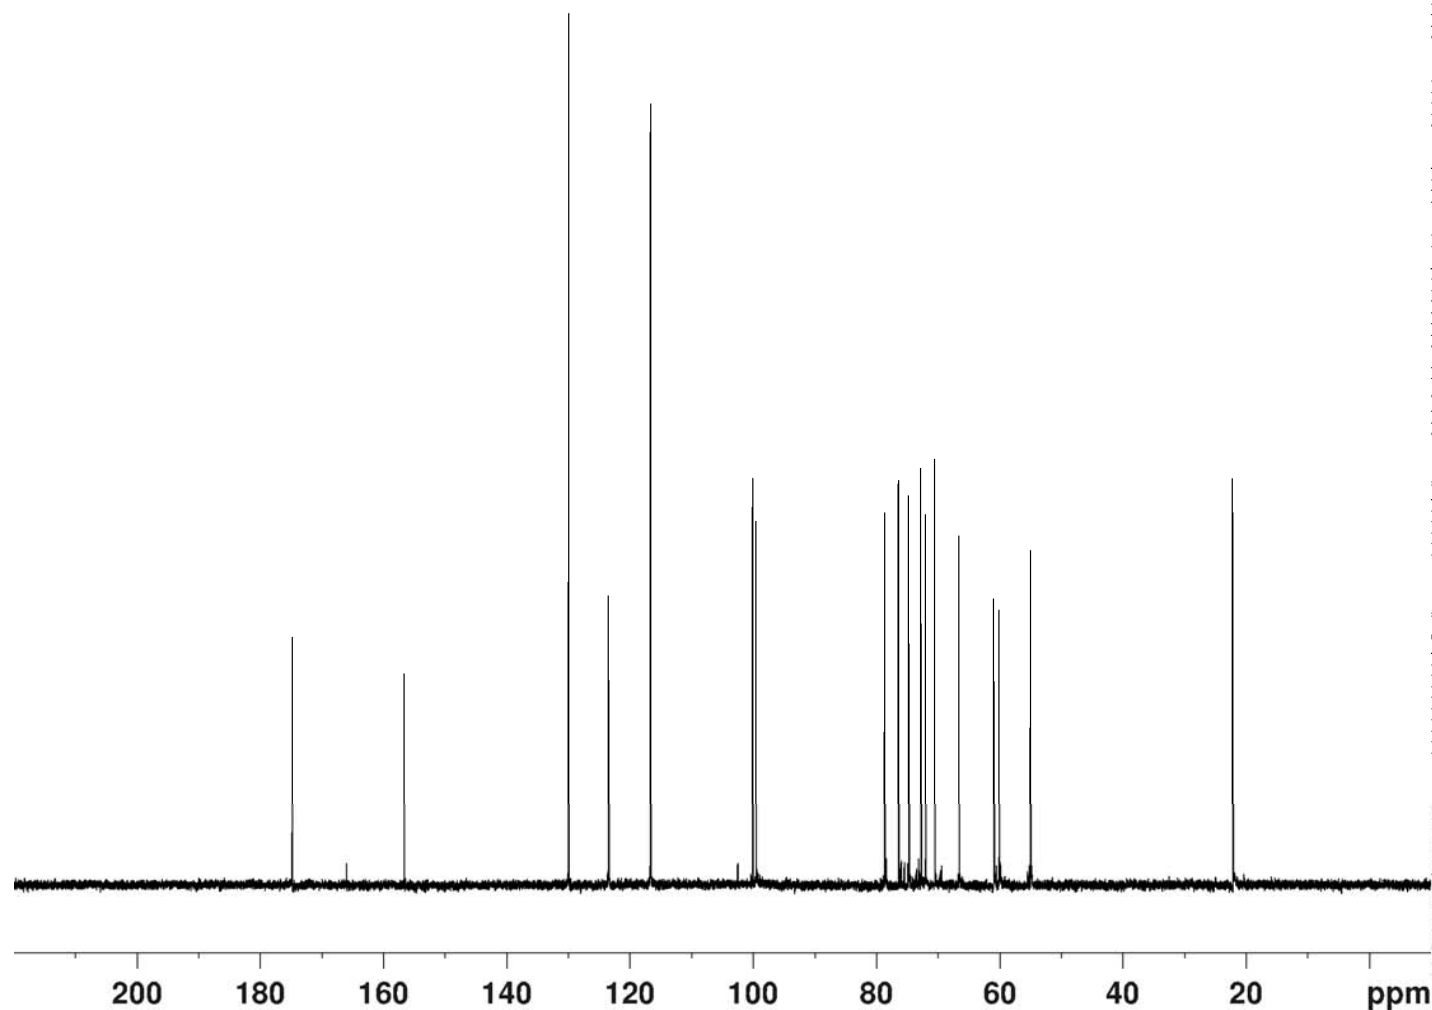

Current Data Parameters  
 NAME dg34093011  
 EXPNO 1  
 PROCNO 1

F2 - Acquisition Parameters  
 Date\_ 20051130  
 Time\_ 18.24  
 INSTRUM avc500  
 PROBHD 5 mm CPDUL 13C  
 PULPROG zgpg30  
 TD 65536  
 SOLVENT D2O  
 NS 256  
 DS 2  
 SWH 31250.000 Hz  
 FIDRES 0.476837 Hz  
 AQ 1.0486259 sec  
 RG 912  
 DW 16.000 usec  
 DE 20.00 usec  
 TE 298.0 K  
 D1 2.00000000 sec  
 d11 0.03000000 sec  
 DELTA 1.89999998 sec  
 TD0 1

==== CHANNEL f1 =====  
 NUC1 13C  
 P1 8.00 usec  
 PL1 -4.40 dB  
 SFO1 125.8131151 MHz

==== CHANNEL f2 =====  
 CPDPRG2 waltz16  
 NUC2 1H  
 PCPD2 80.00 usec  
 PL2 -6.00 dB  
 PL12 12.40 dB  
 PL13 17.00 dB  
 SFO2 500.3020012 MHz

F2 - Processing parameters  
 SI 32768  
 SF 125.8005350 MHz  
 WDW EM  
 SSB 0  
 LB 1.00 Hz  
 GB 0  
 PC 1.40

15

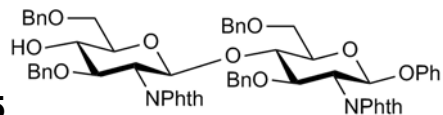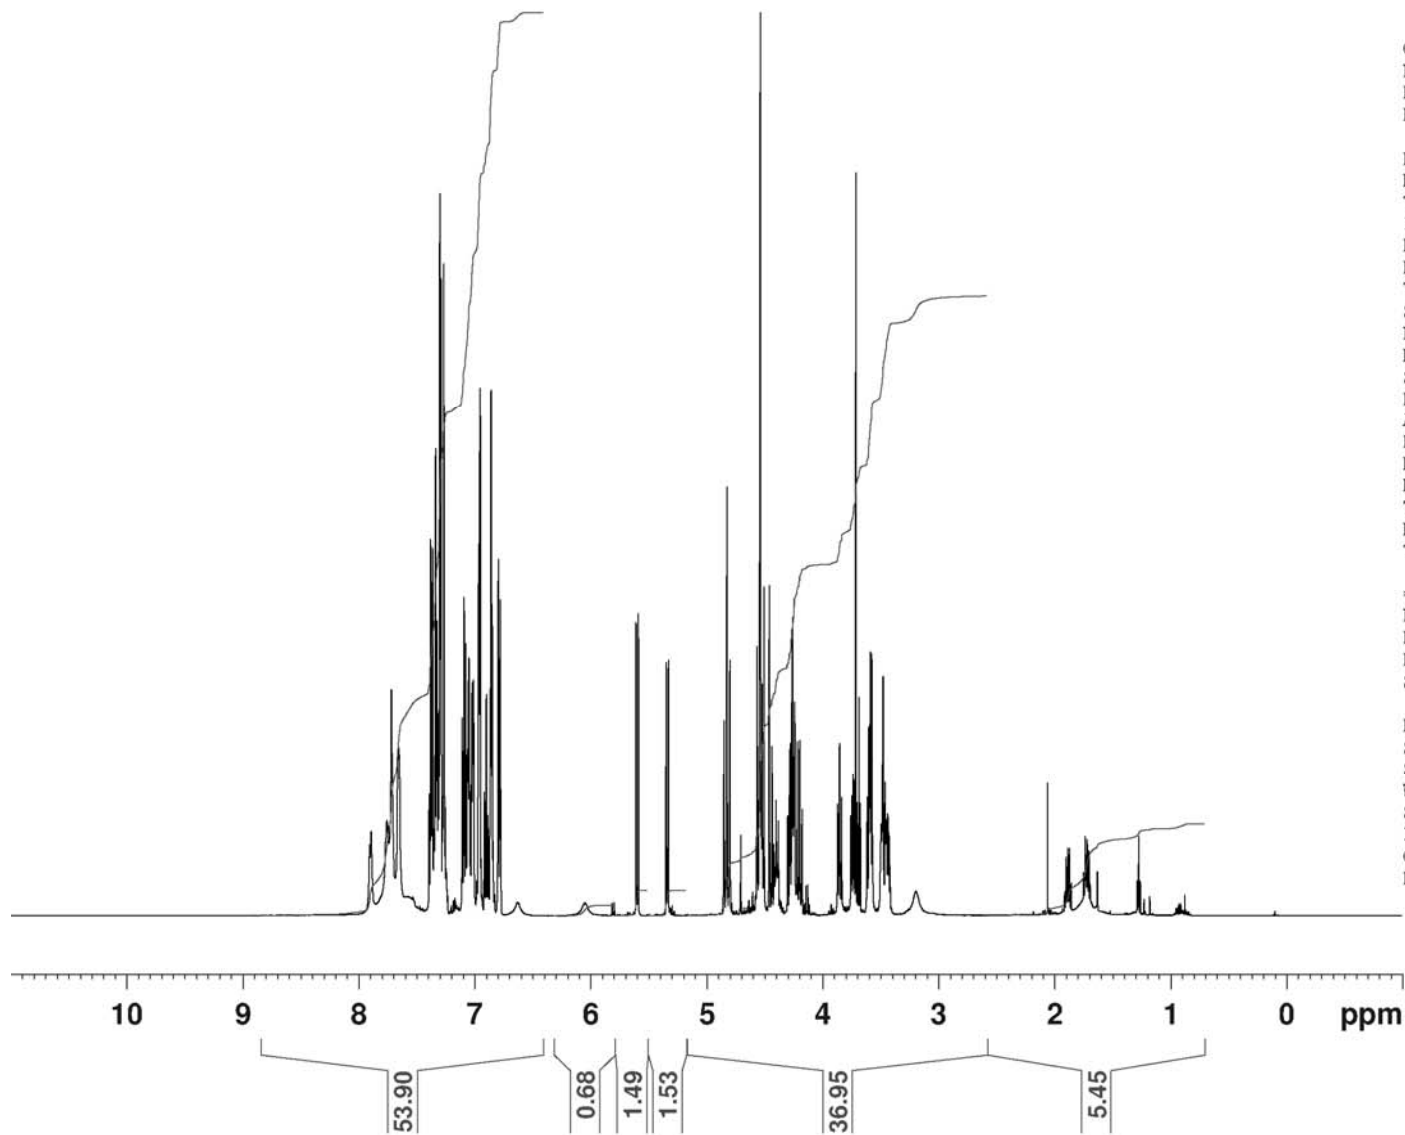

Current Data Parameters  
 NAME dg32901511  
 EXPNO 1  
 PROCNO 1

F2 - Acquisition Parameters  
 Date\_ 20051115  
 Time 15.32  
 INSTRUM avc500  
 PROBHD 5 mm CPDUL 13C  
 PULPROG zg30  
 TD 65536  
 SOLVENT CDC13  
 NS 16  
 DS 2  
 SWH 10330.578 Hz  
 FIDRES 0.157632 Hz  
 AQ 3.1719923 sec  
 RG 4  
 DW 48.400 usec  
 DE 6.00 usec  
 TE 298.0 K  
 D1 1.00000000 sec  
 TD0 1

===== CHANNEL f1 =====  
 NUC1 1H  
 P1 9.60 usec  
 PL1 -6.00 dB  
 SFO1 500.3030896 MHz

F2 - Processing parameters  
 SI 32768  
 SF 500.3000240 MHz  
 WDW EM  
 SSB 0  
 LB 0.30 Hz  
 GB 0  
 PC 1.00

15

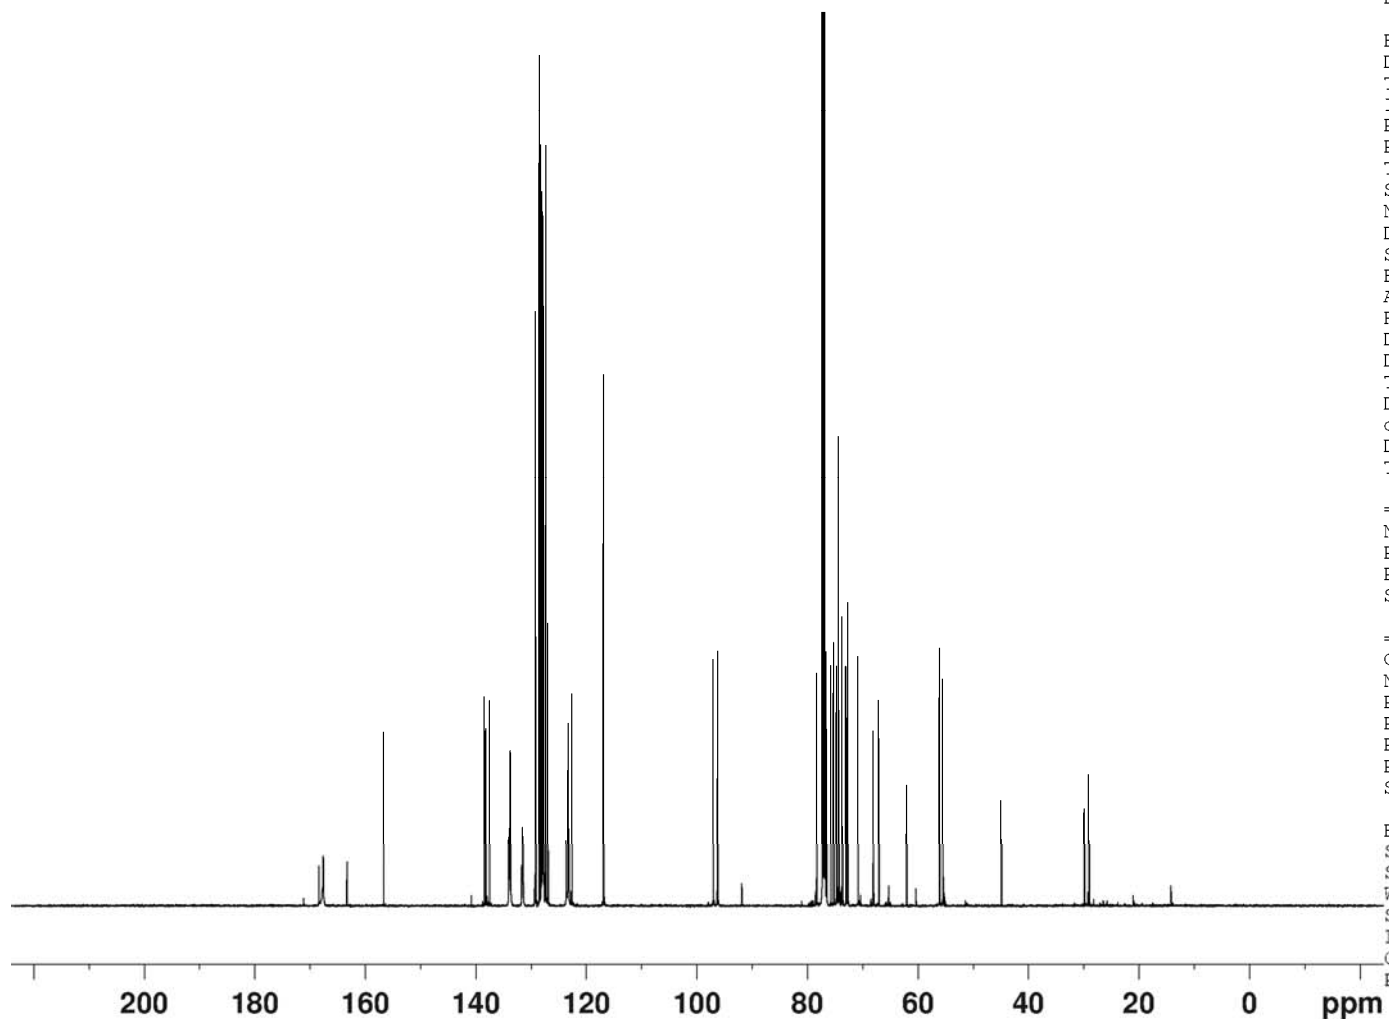

Current Data Parameters  
 NAME dg32901511  
 EXPNO 3  
 PROCNO 1

F2 - Acquisition Parameters  
 Date\_ 20051115  
 Time\_ 17.24  
 INSTRUM avc500  
 PROBHD 5 mm CPDUL 13C  
 PULPROG zgpg30  
 TD 65536  
 SOLVENT CDCl3  
 NS 2048  
 DS 2  
 SWH 31250.000 Hz  
 FIDRES 0.476837 Hz  
 AQ 1.0486259 sec  
 RG 1820  
 DW 16.000 usec  
 DE 20.00 usec  
 TE 298.0 K  
 D1 2.00000000 sec  
 d11 0.03000000 sec  
 DELTA 1.89999998 sec  
 TD0 1

==== CHANNEL f1 =====  
 NUC1 13C  
 P1 8.00 usec  
 PL1 -4.40 dB  
 SFO1 125.8131151 MHz

==== CHANNEL f2 =====  
 CPDPRC2 waltz16  
 NUC2 1H  
 PCPD2 80.00 usec  
 PL2 -6.00 dB  
 PL12 12.40 dB  
 PL13 17.00 dB  
 SFO2 500.3020012 MHz

F2 - Processing parameters  
 SI 32768  
 SF 125.8005438 MHz  
 WDW EM  
 SSB 0  
 LB 1.00 Hz  
 GB 0  
 PC 1.40

16

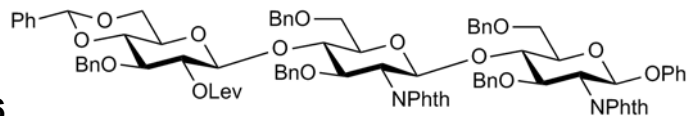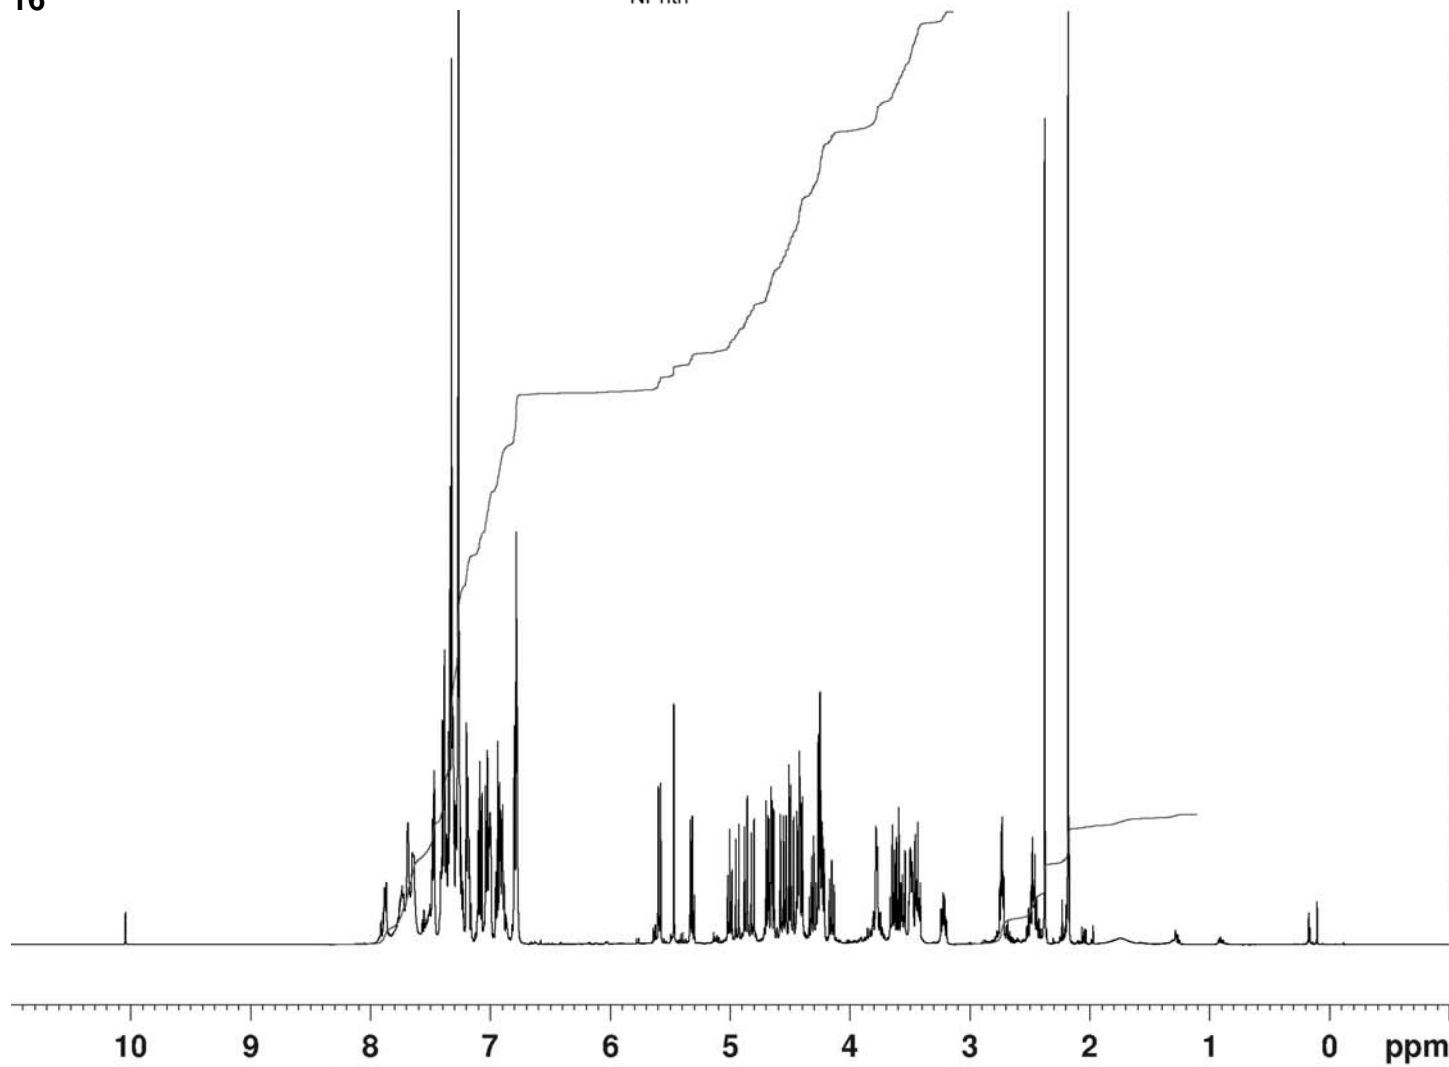

Current Data Parameters  
 NAME dg34560712  
 EXPNO 1  
 PROCNO 1

## F2 - Acquisition Parameters

Date\_ 20051208  
 Time 19.40  
 INSTRUM avc500  
 PROBHD 5 mm CPDUL 13C  
 PULPROG zg30  
 TD 65536  
 SOLVENT CDC13  
 NS 16  
 DS 2  
 SWH 10330.578 Hz  
 FIDRES 0.157632 Hz  
 AQ 3.1719923 sec  
 RG 4  
 DW 48.400 usec  
 DE 6.00 usec  
 TE 298.0 K  
 D1 1.00000000 sec  
 TD0 1

## ===== CHANNEL f1 =====

NUC1 1H  
 P1 9.60 usec  
 PL1 -6.00 dB  
 SFO1 500.3030896 MHz

## F2 - Processing parameters

SI 32768  
 SF 500.3000240 MHz  
 WDW EM  
 SSB 0  
 LB 0.30 Hz  
 GB 0  
 PC 1.00

16

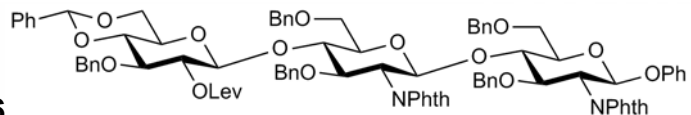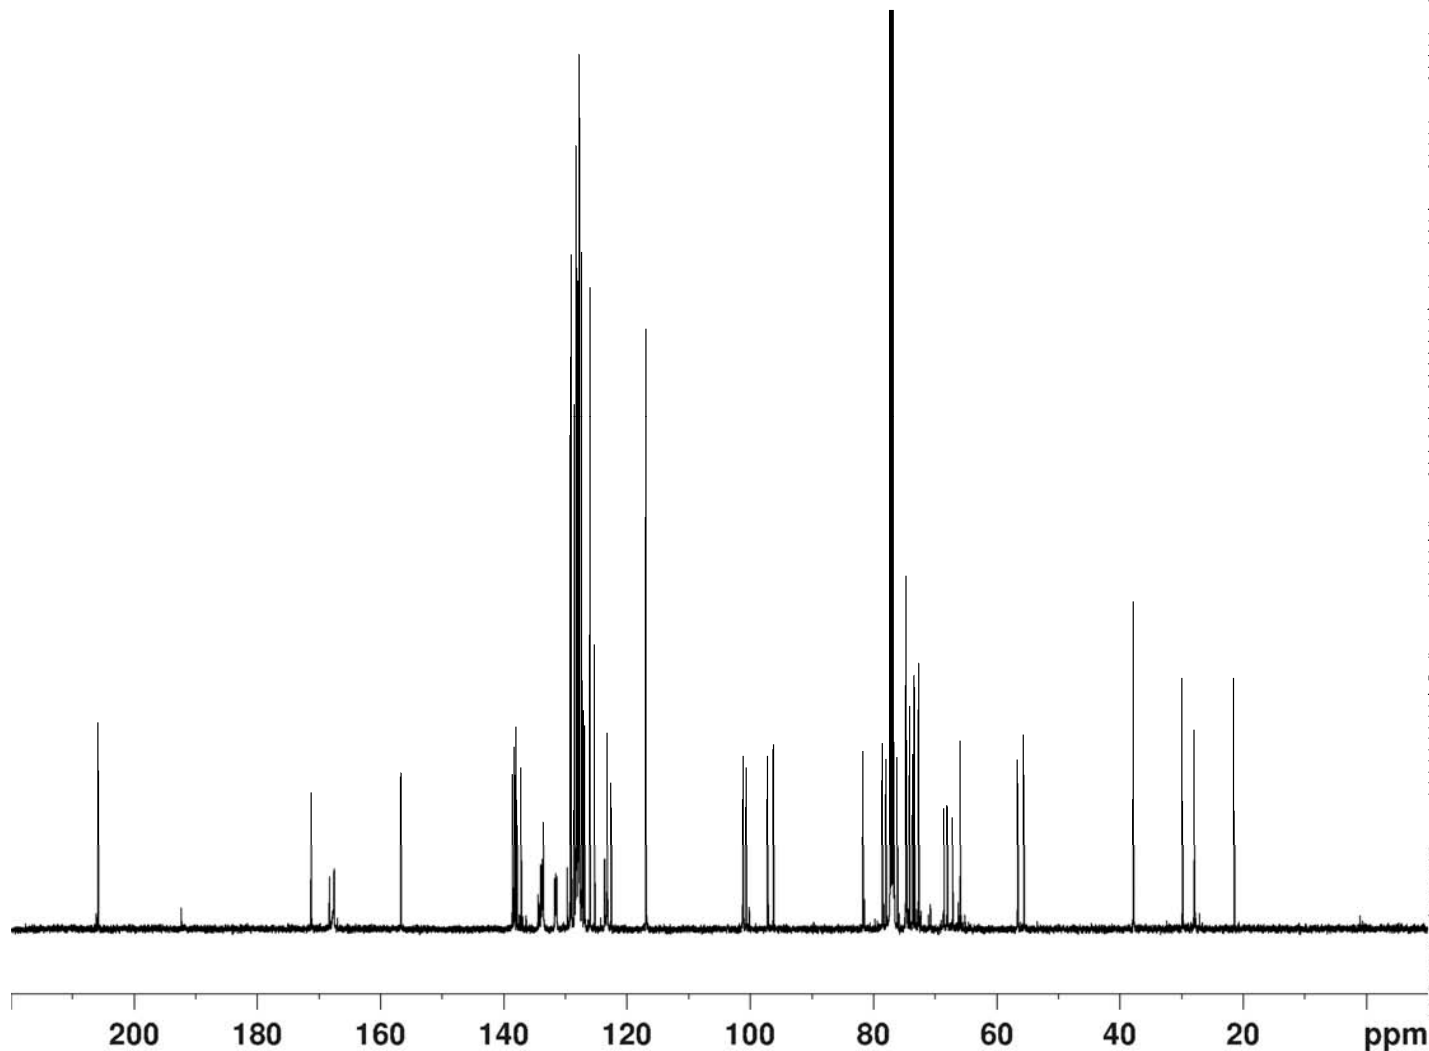

Current Data Parameters  
 NAME dg34560712  
 EXPNO 6  
 PROCNO 1

F2 - Acquisition Parameters  
 Date\_ 20051208  
 Time\_ 20.32  
 INSTRUM avc500  
 PROBHD 5 mm CPDUL 13C  
 PULPROG zgpg30  
 TD 65536  
 SOLVENT CDC13  
 NS 256  
 DS 2  
 SWH 31250.000 Hz  
 FIDRES 0.476837 Hz  
 AQ 1.0486259 sec  
 RG 1620  
 DW 16.000 usec  
 DE 20.00 usec  
 TE 298.0 K  
 D1 2.00000000 sec  
 d11 0.03000000 sec  
 DELTA 1.89999998 sec  
 TD0 1

==== CHANNEL f1 =====  
 NUC1 13C  
 P1 8.00 usec  
 PL1 -4.40 dB  
 SFO1 125.8131151 MHz

==== CHANNEL f2 =====  
 CPDPRG2 waltz16  
 NUC2 1H  
 PCPD2 80.00 usec  
 PL2 -6.00 dB  
 PL12 12.40 dB  
 PL13 17.00 dB  
 SFO2 500.3020012 MHz

F2 - Processing parameters  
 SI 32768  
 SF 125.8005438 MHz  
 WDW EM  
 SSB 0  
 LB 1.00 Hz  
 GB 0  
 PC 1.40

17

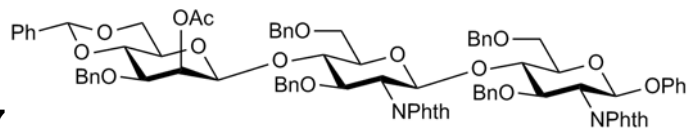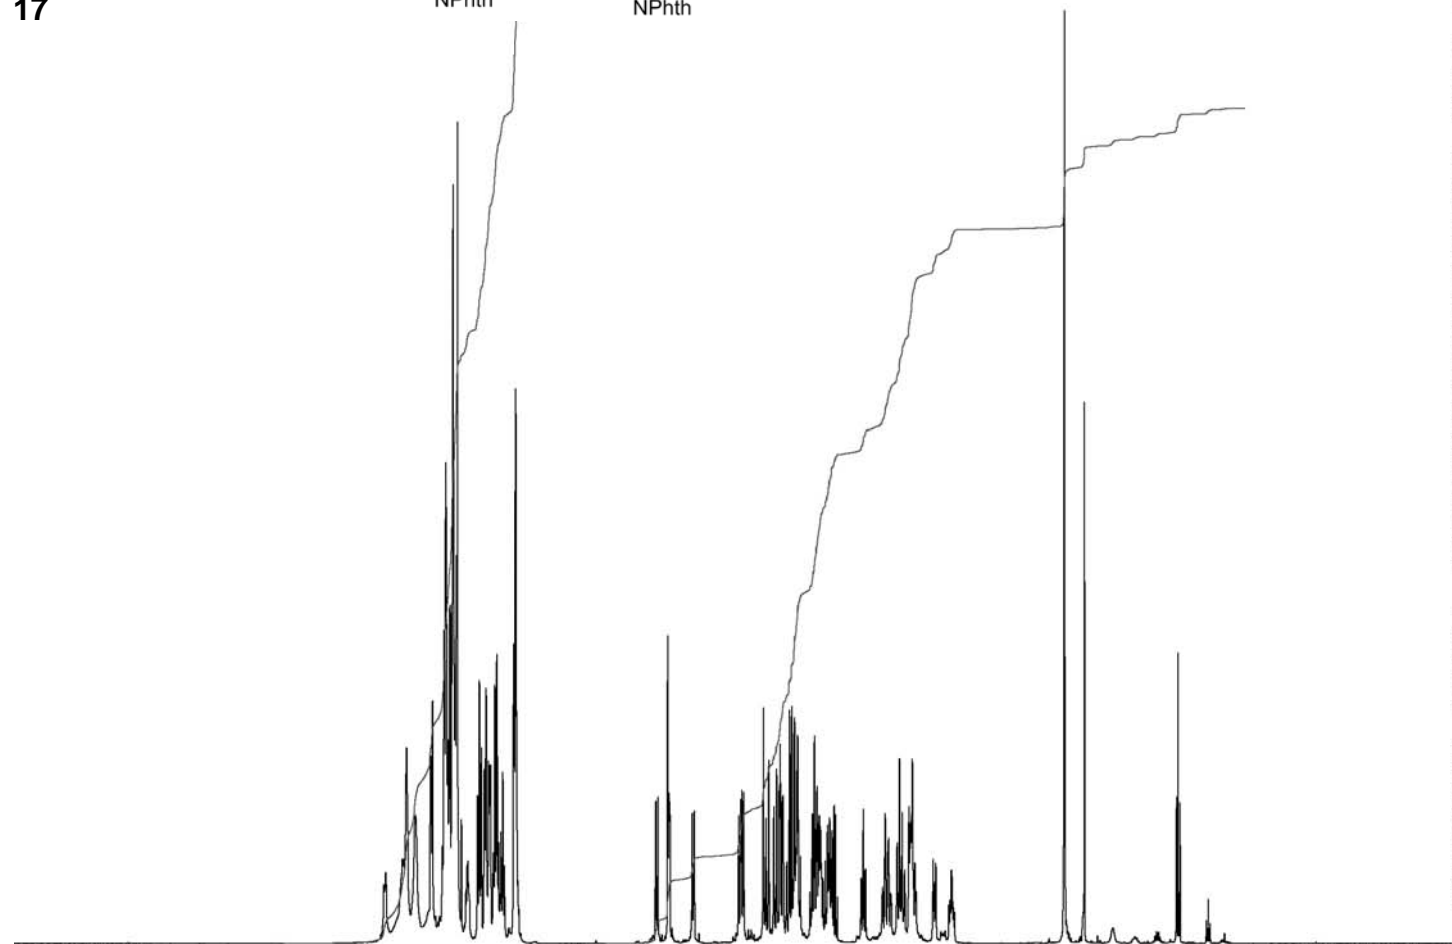

10 9 8 7 6 5 4 3 2 1 0 ppm

52.76

47.24

# NMR@CHEM.OX

Current Data Parameters  
 NAME dg38191502  
 EXPNO 1  
 PROCNO 1

F2 - Acquisition Parameters  
 Date\_ 20060215  
 Time 8.11  
 INSTRUM avc500  
 PROBHD 5 mm CPDUL 13C  
 PULPROG zg30  
 TD 65536  
 SOLVENT CDC13  
 NS 16  
 DS 2  
 SWH 10330.578 Hz  
 FIDRES 0.157632 Hz  
 AQ 3.1719923 sec  
 RG 4  
 DW 48.400 usec  
 DE 6.00 usec  
 TE 298.0 K  
 D1 1.00000000 sec  
 TD0 1

===== CHANNEL f1 =====  
 NUC1 1H  
 P1 9.60 usec  
 PL1 -6.00 dB  
 SFO1 500.3030896 MHz

F2 - Processing parameters  
 SI 32768  
 SF 500.3000240 MHz  
 WDW EM  
 SSB 0  
 LB 0.30 Hz  
 GB 0  
 PC 1.00



NMR@CHEM.OX

Current Data Parameters  
NAME dg38191502  
EXPNO 2  
PROCNO 1

F2 - Acquisition Parameters  
Date\_ 20060215  
Time 8.26  
INSTRUM avc500  
PROBHD 5 mm CPDUL 13C  
PULPROG zgpg30  
TD 65536  
SOLVENT CDC13  
NS 256  
DS 2  
SWH 31250.000 Hz  
FIDRES 0.476837 Hz  
AQ 1.0486259 sec  
RG 1150  
DW 16.000 usec  
DE 20.00 usec  
TE 298.0 K  
D1 2.00000000 sec  
d11 0.03000000 sec  
DELTA 1.89999998 sec  
TD0 1

==== CHANNEL f1 =====  
NUC1 13C  
P1 8.00 usec  
PL1 -4.40 dB  
SFO1 125.8131151 MHz

==== CHANNEL f2 =====  
CPDPRG2 waltz16  
NUC2 1H  
PCPD2 80.00 usec  
PL2 -6.00 dB  
PL12 12.40 dB  
PL13 17.00 dB  
SFO2 500.3020012 MHz

F2 - Processing parameters  
SI 32768  
SF 125.8005438 MHz  
WDW EM  
SSB 0  
LB 1.00 Hz  
GB 0  
PC 1.40

17

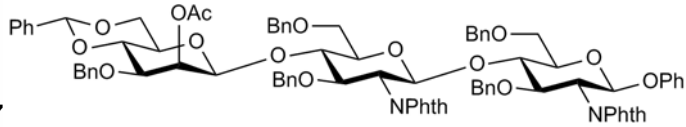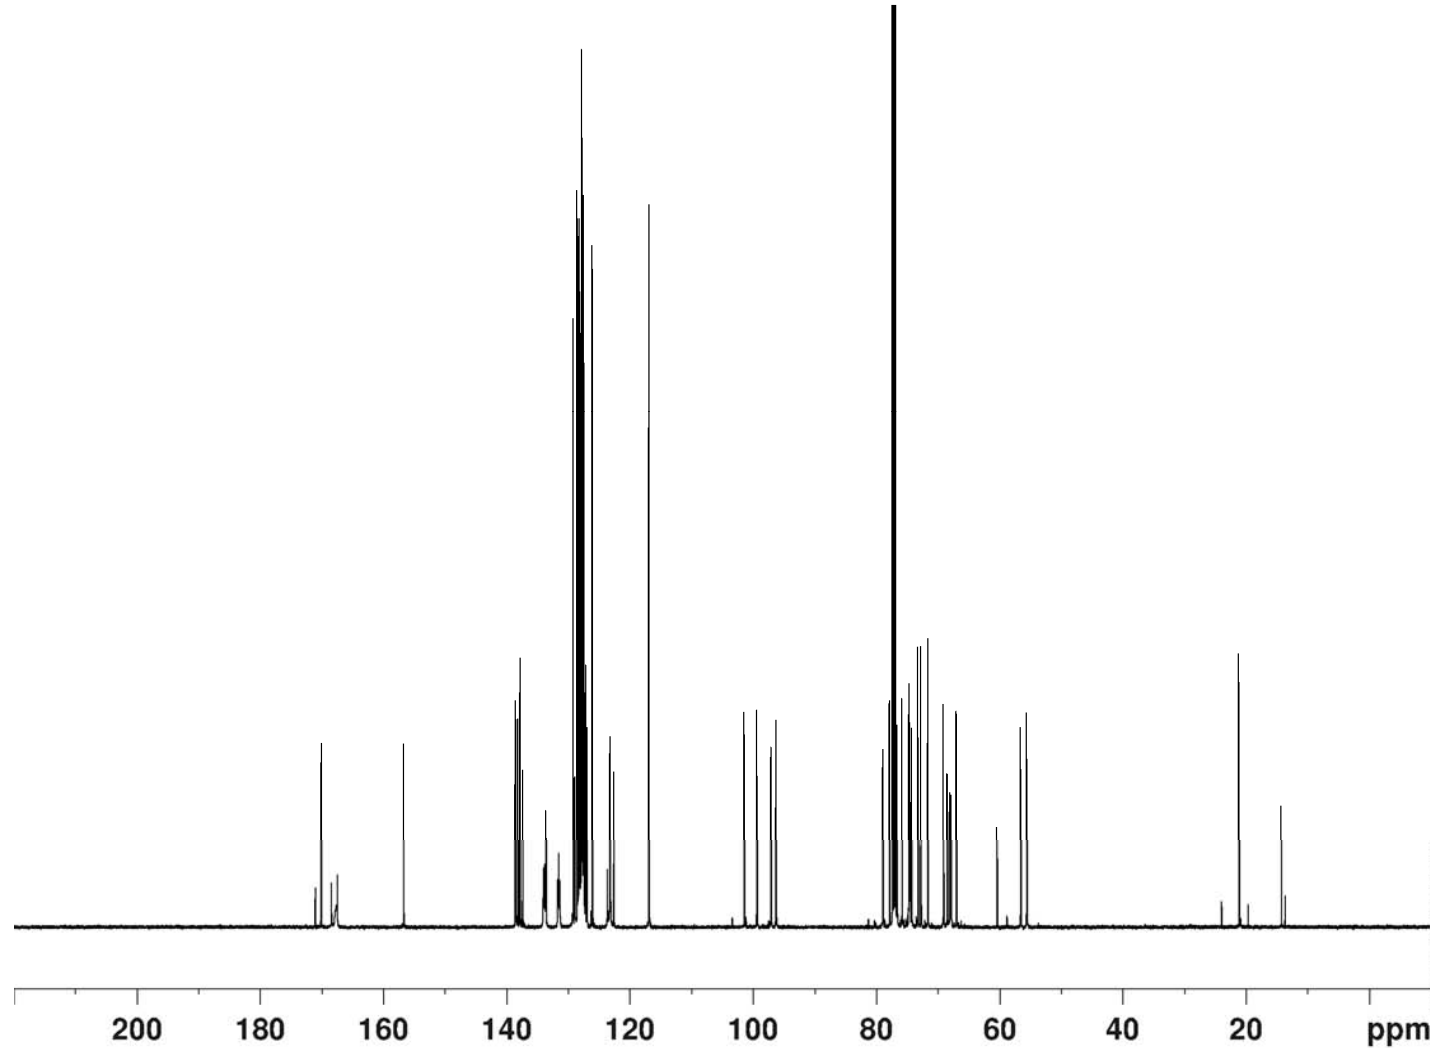

39

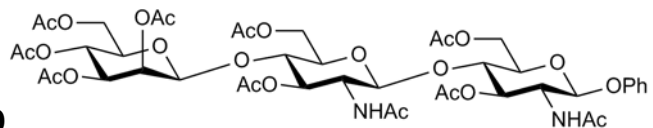

NMR@CHEM.OX

Current Data Parameters  
 NAME dg40762703  
 EXPNO 1  
 PROCNO 1

F2 - Acquisition Parameters  
 Date\_ 20060327  
 Time 11.15  
 INSTRUM avc500  
 PROBHD 5 mm CPDUL 13C  
 PULPROG zg30  
 TD 65536  
 SOLVENT CDC13  
 NS 16  
 DS 2  
 SWH 10330.578 Hz  
 FIDRES 0.157632 Hz  
 AQ 3.1719923 sec  
 RG 4  
 DW 48.400 usec  
 DE 6.00 usec  
 TE 298.0 K  
 D1 1.00000000 sec  
 TD0 1

==== CHANNEL f1 =====  
 NUC1 1H  
 P1 9.60 usec  
 PL1 -6.00 dB  
 SFO1 500.3030896 MHz

F2 - Processing parameters  
 SI 32768  
 SF 500.3000240 MHz  
 WDW EM  
 SSB 0  
 LB 0.30 Hz  
 GB 0  
 PC 1.00

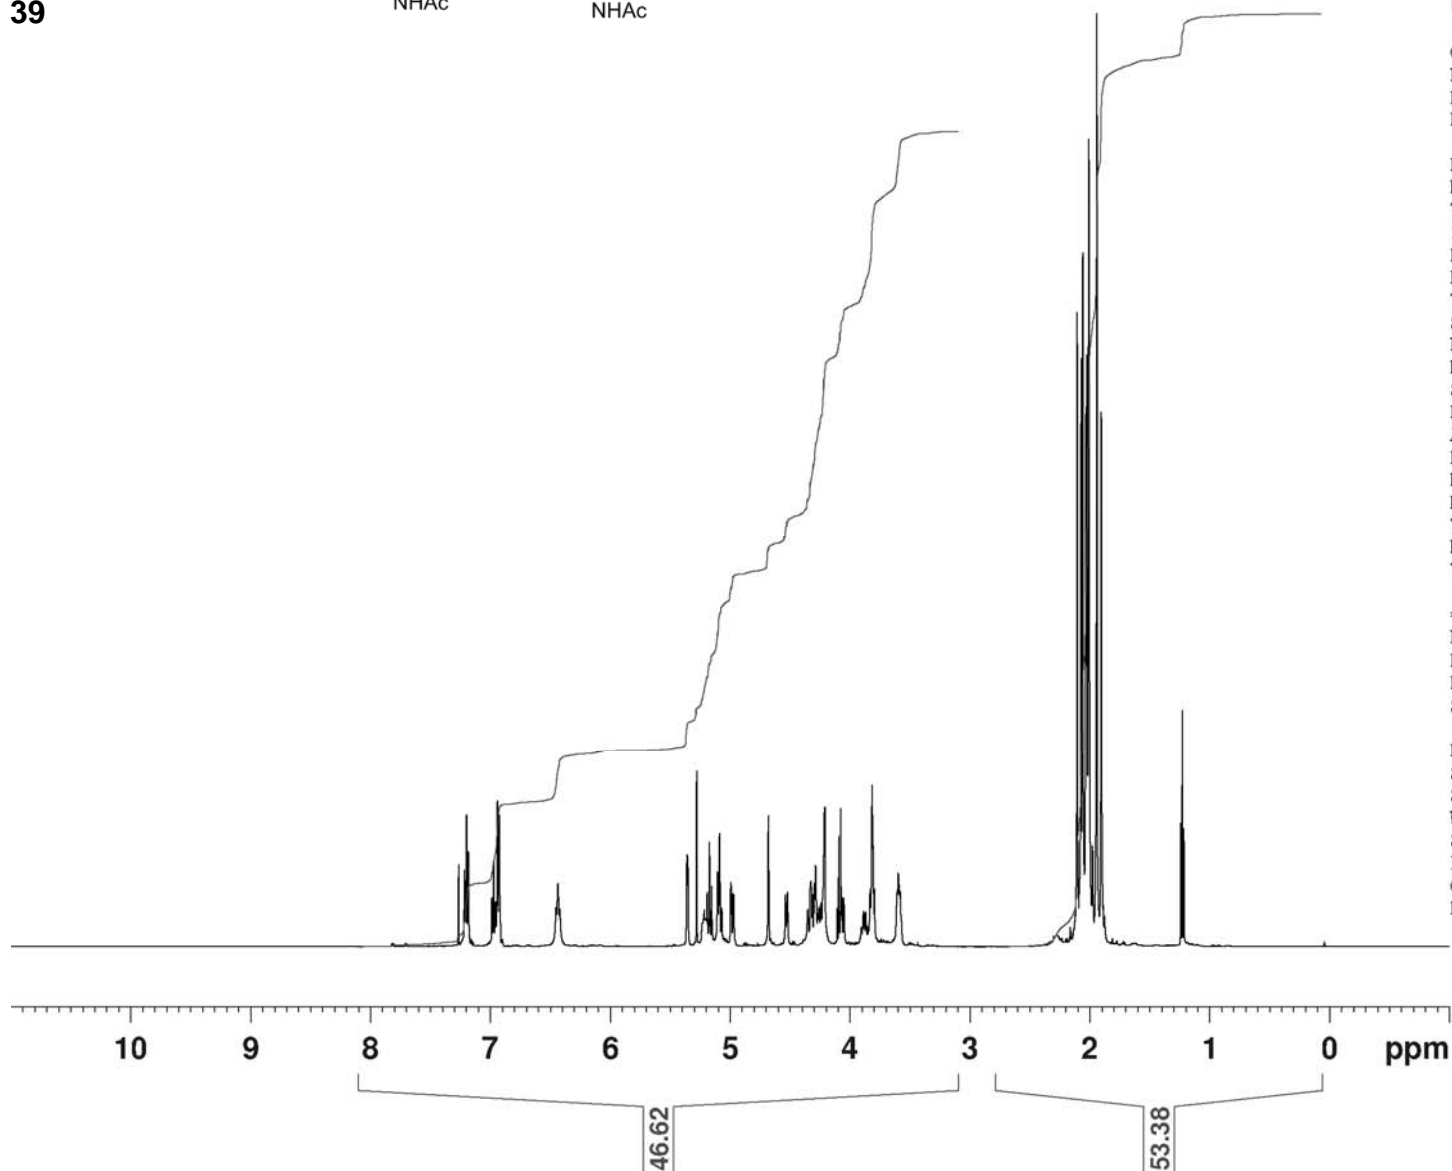

NMR@CHEM.OX

14.14

Current Data Parameters  
NAME dg40762703  
EXPNO 4  
PROCNO 1

F2 - Acquisition Parameters  
Date\_ 20060327  
Time 11.45  
INSTRUM avc5000  
PROBHD 5 mm CPDUL 13C  
PULPROG zgpg30  
TD 65536  
SOLVENT CDC13  
NS 256  
DS 2  
SWH 31250.000 Hz  
FIDRES 0.476837 Hz  
AQ 1.0486259 sec  
RG 1620  
DW 16.000 usec  
DE 20.00 usec  
TE 298.0 K  
D1 2.00000000 sec  
d11 0.03000000 sec  
DELTA 1.89999998 sec  
TD0 1

==== CHANNEL f1 =====  
NUC1 13C  
P1 8.00 usec  
PL1 -4.40 dB  
SFO1 125.8131151 MHz

==== CHANNEL f2 =====  
CPDPRG2 waltz16  
NUC2 1H  
PCPD2 80.00 usec  
PL2 -6.00 dB  
PL12 12.40 dB  
PL13 17.00 dB  
SFO2 500.3020012 MHz

F2 - Processing parameters  
SI 32768  
SF 125.8005438 MHz  
WDW EM  
SSB 0  
LB 1.00 Hz  
GB 0  
PC 1.40

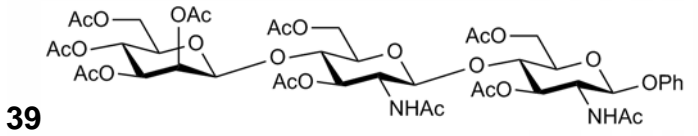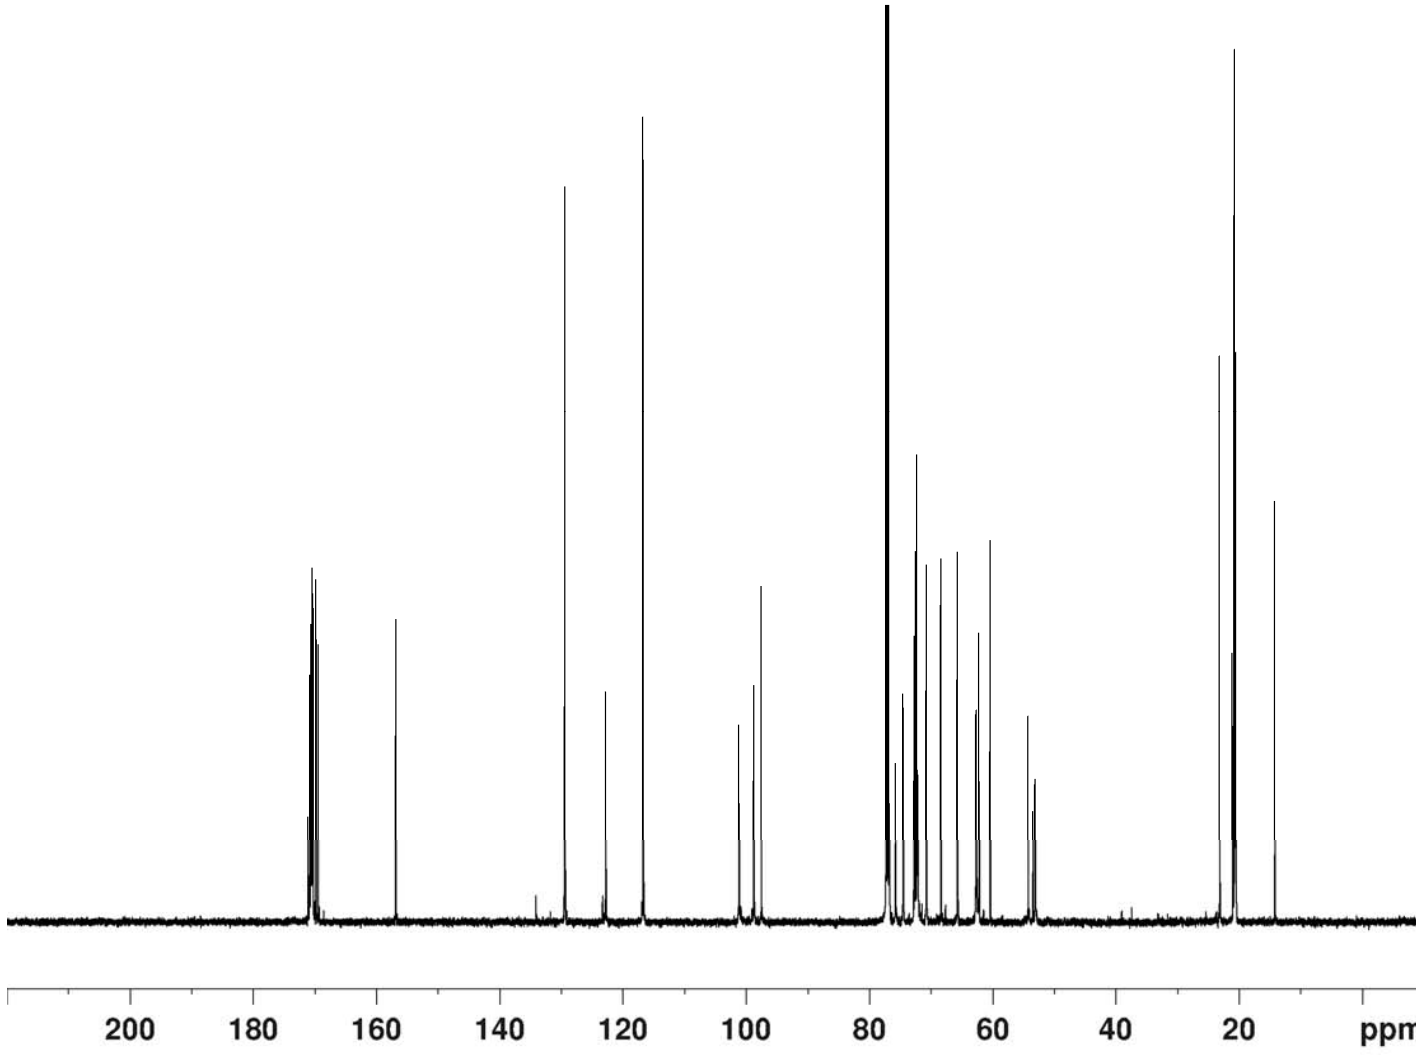

NMR@CHEM.OX

Current Data Parameters  
NAME dg41620604  
EXPNO 3  
PROCNO 1

F2 - Acquisition Parameters  
Date\_ 20060406  
Time 17.42  
INSTRUM avc500  
PROBHD 5 mm CPDUL 13C  
PULPROG zg30  
TD 65536  
SOLVENT D2O  
NS 16  
DS 2  
SWH 10330.578 Hz  
FIDRES 0.157632 Hz  
AQ 3.1719923 sec  
RG 12.7  
DW 48.400 usec  
DE 6.00 usec  
TE 298.0 K  
D1 1.00000000 sec  
TD0 1

==== CHANNEL f1 =====  
NUC1 1H  
P1 9.60 usec  
PL1 -6.00 dB  
SFO1 500.3030896 MHz

F2 - Processing parameters  
SI 32768  
SF 500.300000 MHz  
WDW EM  
SSB 0  
LB 0.30 Hz  
GB 0  
PC 1.00

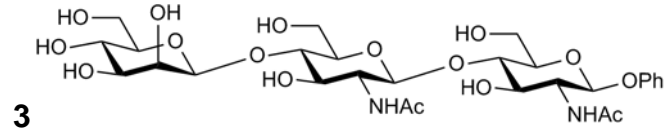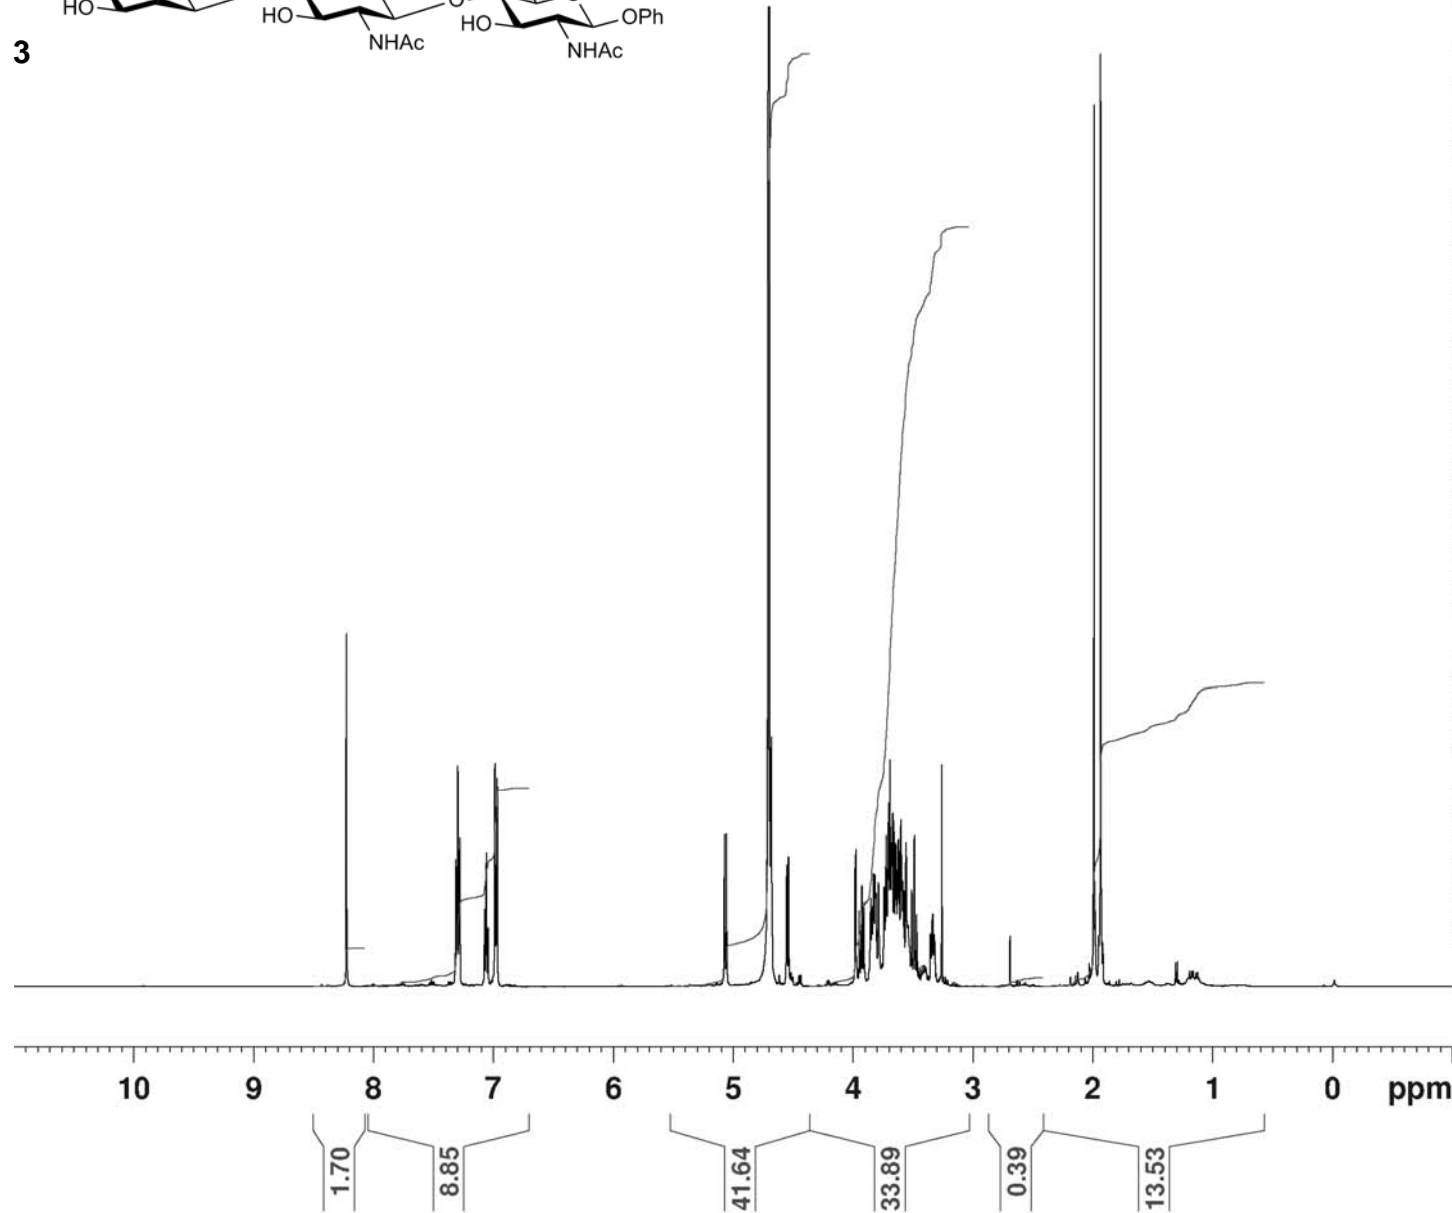

NMR@CHEM.OX

Current Data Parameters  
NAME dg41620604  
EXPNO 1  
PROCNO 1

F2 - Acquisition Parameters  
Date\_ 20060406  
Time\_ 17.27  
INSTRUM avc500  
PROBHD 5 mm CPDUL 13C  
PULPROG zgpg30  
TD 65536  
SOLVENT D2O  
NS 256  
DS 2  
SWH 31250.000 Hz  
FIDRES 0.476837 Hz  
AQ 1.0486259 sec  
RG 1620  
DW 16.000 usec  
DE 20.00 usec  
TE 298.0 K  
D1 2.00000000 sec  
d11 0.03000000 sec  
DELTA 1.89999998 sec  
TD0 1

==== CHANNEL f1 =====  
NUC1 13C  
P1 8.00 usec  
PL1 -4.40 dB  
SFO1 125.8131151 MHz

==== CHANNEL f2 =====  
CPDPRG2 waltz16  
NUC2 1H  
PCPD2 80.00 usec  
PL2 -6.00 dB  
PL12 12.40 dB  
PL13 17.00 dB  
SFO2 500.3020012 MHz

F2 - Processing parameters  
SI 32768  
SF 125.8005350 MHz  
WDW EM  
SSB 0  
LB 1.00 Hz  
GB 0  
PC 1.40

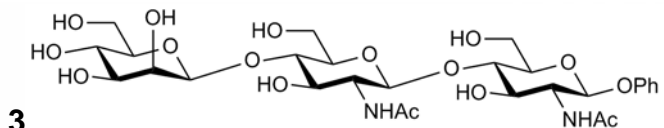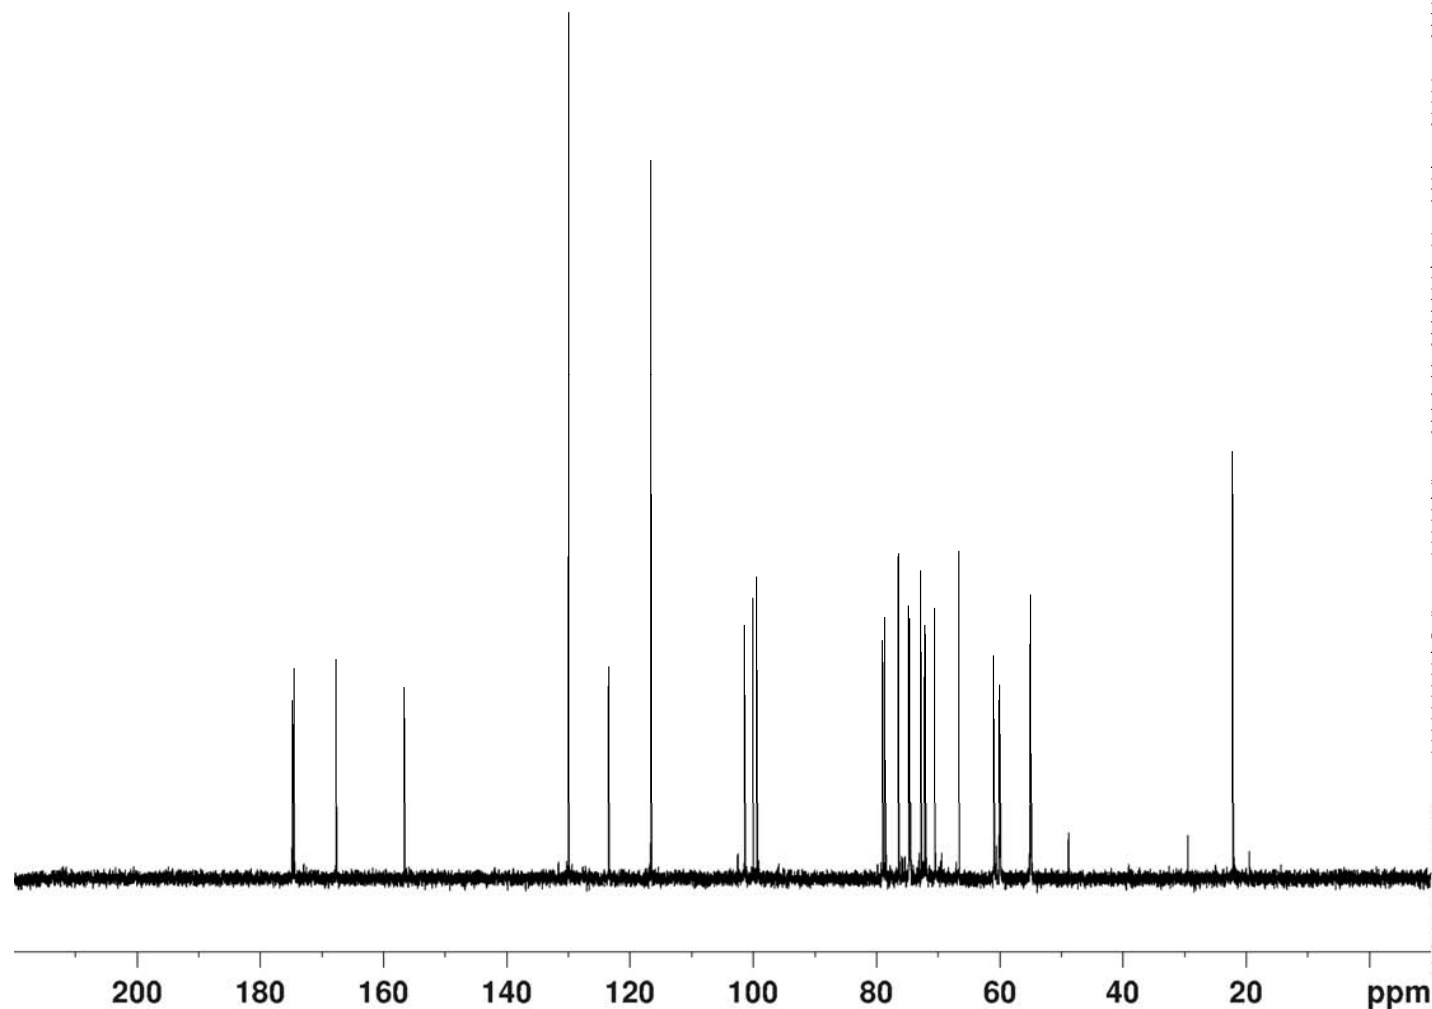

33

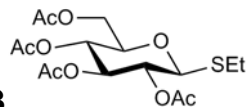

NMR@CHEM.OX

NAME Jan08-2010-21  
 EXPNO 1  
 PROCNO 1  
 Date\_ 20100109  
 Time 5.28  
 INSTRUM av400  
 PROBHD 5 mm QNP 1H/13  
 PULPROG zg60  
 TD 65536  
 SOLVENT CDC13  
 NS 16  
 DS 2  
 SWH 8278.146 Hz  
 FIDRES 0.126314 Hz  
 AQ 3.9584243 sec  
 RG 90.5  
 DW 60.400 usec  
 DE 7.50 usec  
 TE 300.0 K  
 D1 1.00000000 sec

===== CHANNEL f1 =====  
 NUC1 1H  
 P1 9.00 usec  
 PL1 0.00 dB  
 SFO1 400.2024714 MHz  
 SI 32768  
 SF 400.2000028 MHz  
 WDW EM  
 SSB 0  
 LB 0.30 Hz  
 GB 0  
 PC 1.00

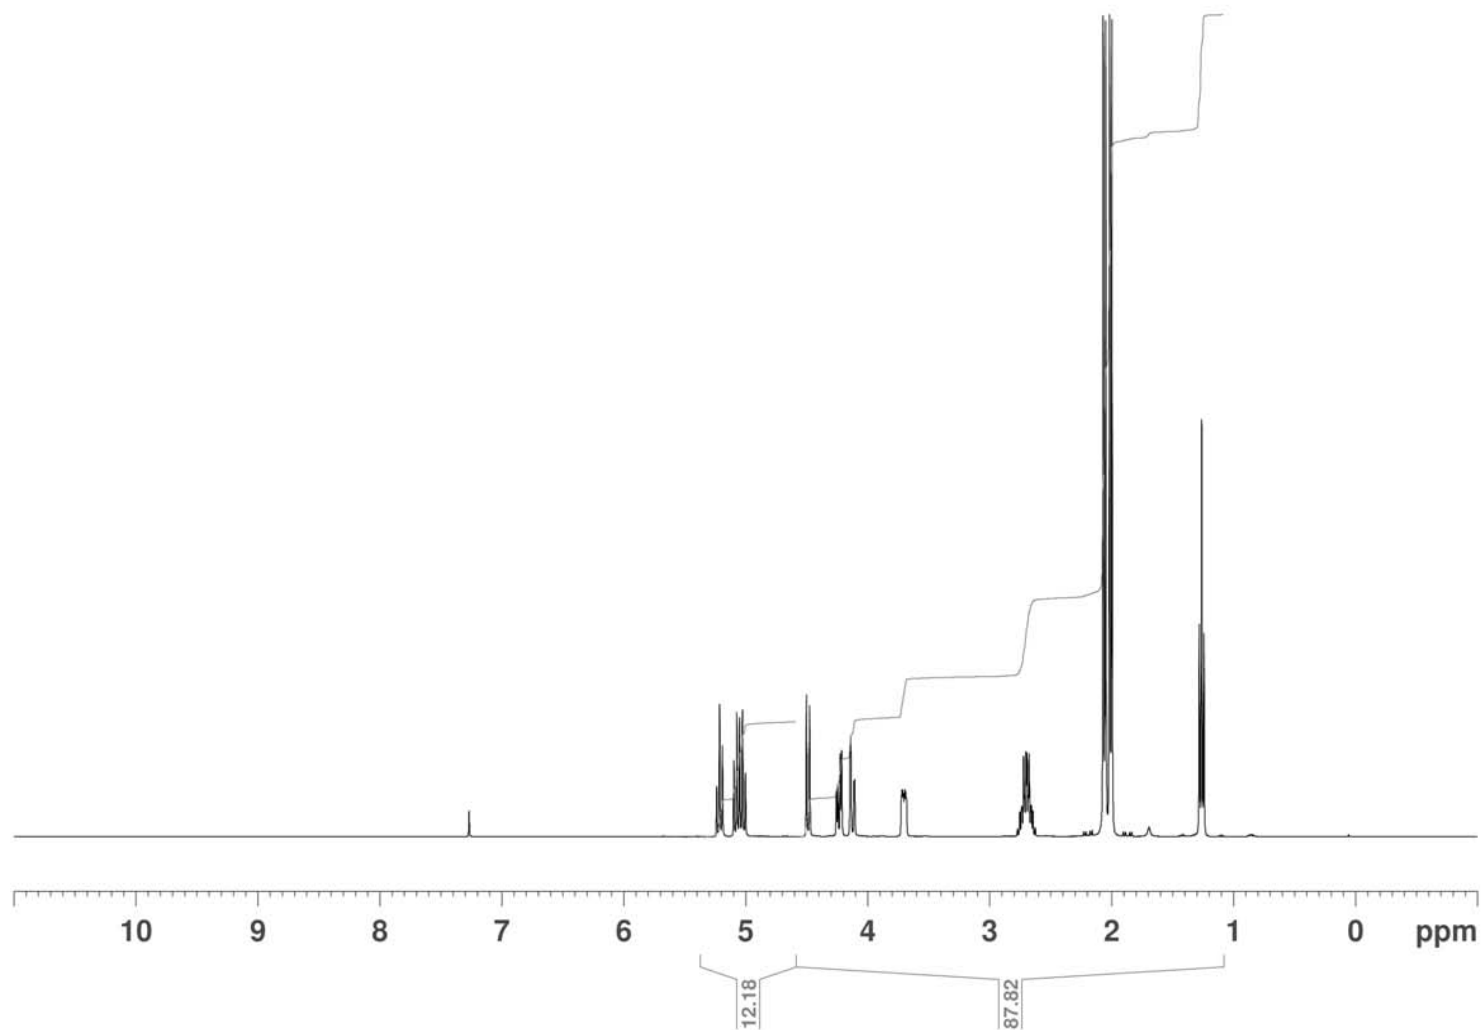

33

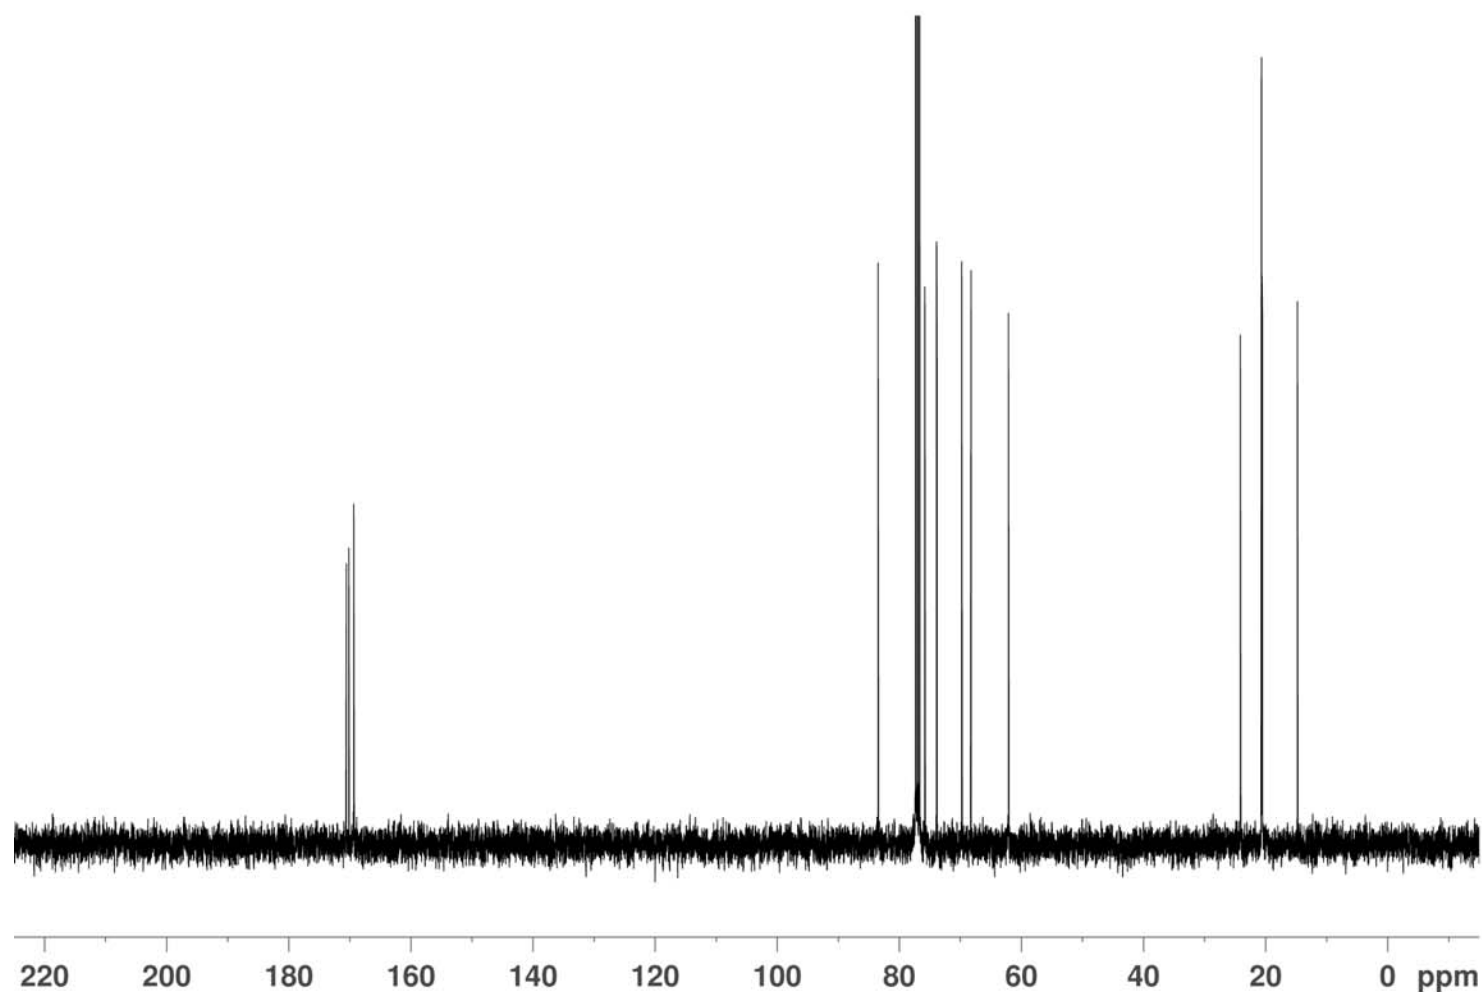

NMR@CHEM.OX

```

NAME      Jan08-2010-21
EXPNO     2
PROCNO    1
Date_     20100109
Time      5.35
INSTRUM   av400
PROBHD    5 mm QNP 1H/13
PULPROG   zgpg30
TD        32768
SOLVENT   CDC13
NS        256
DS        4
SWH       26178.010 Hz
FIDRES    0.798889 Hz
AQ        0.6259188 sec
RG        32768
DW        19.100 usec
DE        7.50 usec
TE        300.0 K
D1        1.00000000 sec
D11       0.03000000 sec
TD0       1
  
```

```

===== CHANNEL f1 =====
NUC1      13C
P1        9.50 usec
PL1       0.00 dB
SFO1     100.6403931 MHz
  
```

```

===== CHANNEL f2 =====
CPDPRG2   waltz16
NUC2      1H
PCPD2     80.00 usec
PL2       0.00 dB
PL12     19.00 dB
PL13     25.00 dB
SFO2     400.2016008 MHz
SI        32768
SF       100.6303718 MHz
WDW       EM
SSB       0
LB        1.00 Hz
GB        0
PC        1.40
  
```

19

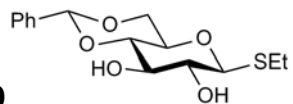

# NMR@CHEM.OX

Current Data Parameters  
 NAME May17-2010-9  
 EXPNO 1  
 PROCNO 1

F2 - Acquisition Parameters  
 Date\_ 20100517  
 Time 9.12  
 INSTRUM dpx400  
 PROBHD 5 mm Dual 1H/1  
 PULPROG zg60  
 TD 32768  
 SOLVENT CDCl3  
 NS 16  
 DS 2  
 SWH 5592.841 Hz  
 FIDRES 0.170680 Hz  
 AQ 2.9295092 sec  
 RG 45.3  
 DW 89.400 usec  
 DE 17.00 usec  
 TE 300.0 K  
 D1 1.00000000 sec

==== CHANNEL f1 =====  
 NUC1 1H  
 P1 7.30 usec  
 PL1 0.00 dB  
 SFO1 400.1320007 MHz

F2 - Processing parameters  
 SI 32768  
 SF 400.1300182 MHz  
 WDW EM  
 SSB 0  
 LB 0.30 Hz  
 GB 0  
 PC 0.60

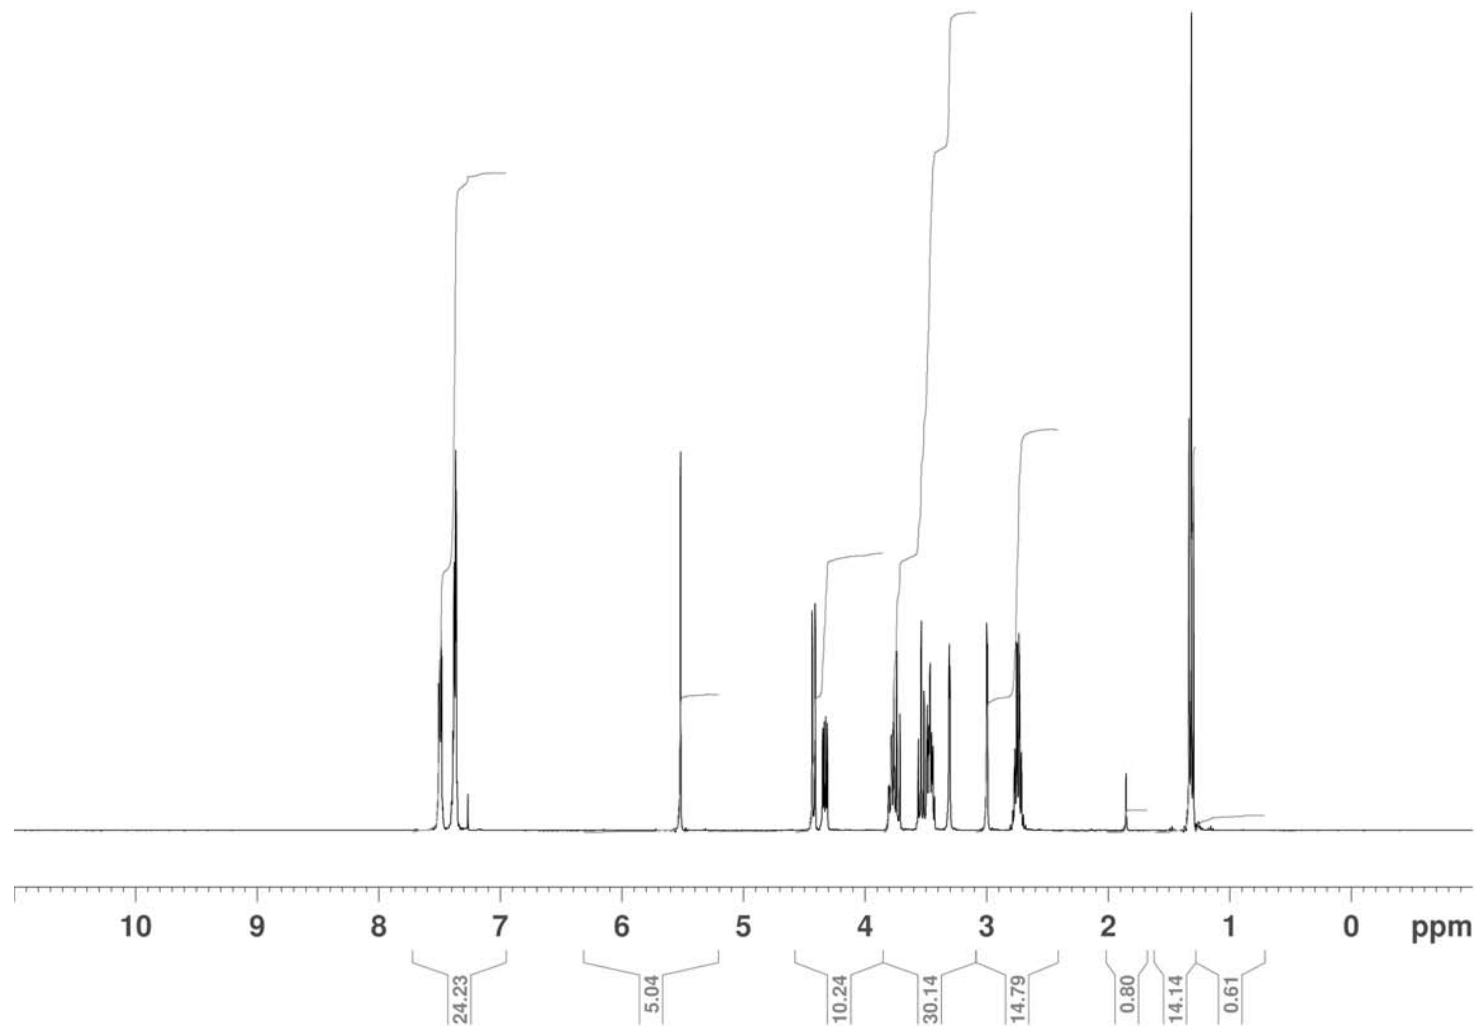



19

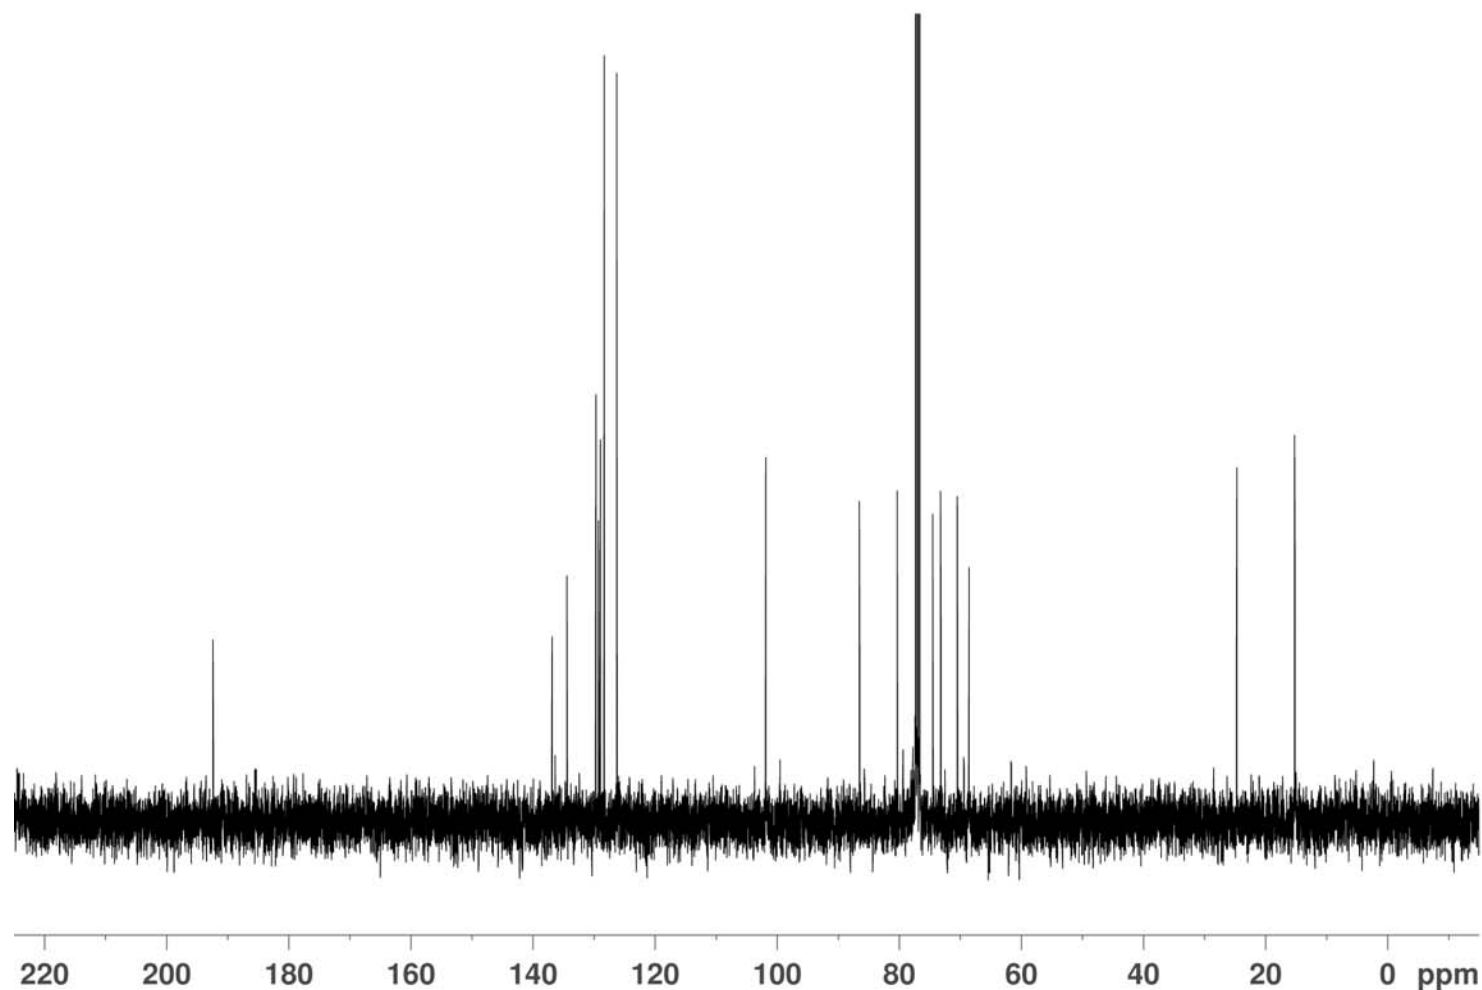

# NMR@CHEM.OX

```

NAME      Feb10-2010-36
EXPNO     2
PROCNO    1
Date_     20100210
Time      20.34
INSTRUM   av400
PROBHD    5 mm QNP 1H/13
PULPROG   zgpg30
TD         32768
SOLVENT   CDC13
NS         256
DS         4
SWH        26178.010 Hz
FIDRES     0.798889 Hz
AQ         0.6259188 sec
RG         32768
DW         19.100 usec
DE         7.50 usec
TE         300.0 K
D1         1.00000000 sec
D11        0.03000000 sec
TD0        1
  
```

```

===== CHANNEL f1 =====
NUC1      13C
P1         9.50 usec
PL1        0.00 dB
SFO1      100.6403931 MHz
  
```

```

===== CHANNEL f2 =====
CPDPRG2   waltz16
NUC2       1H
PCPD2      80.00 usec
PL2         0.00 dB
PL12        19.00 dB
PL13        25.00 dB
SFO2      400.2016008 MHz
SI         32768
SF         100.6303718 MHz
WDW         EM
SSB         0
LB          1.00 Hz
GB          0
PC          1.40
  
```

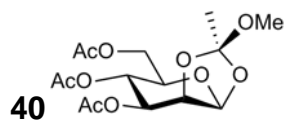

NMR@CHEM.OX

Current Data Parameters  
 NAME Feb25-2009-20  
 EXPNO 1  
 PROCNO 1

F2 - Acquisition Parameters  
 Date\_ 20090225  
 Time 12.20  
 INSTRUM dpx400  
 PROBHD 5 mm Dual 1H/1  
 PULPROG zg60  
 TD 32768  
 SOLVENT CDCl3  
 NS 16  
 DS 2  
 SWH 5592.841 Hz  
 FIDRES 0.170680 Hz  
 AQ 2.9295092 sec  
 RG 80.6  
 DW 89.400 usec  
 DE 17.00 usec  
 TE 300.0 K  
 D1 1.00000000 sec

===== CHANNEL f1 =====  
 NUC1 1H  
 P1 7.30 usec  
 PL1 0.00 dB  
 SFO1 400.1320007 MHz

F2 - Processing parameters  
 SI 32768  
 SF 400.1300182 MHz  
 WDW EM  
 SSB 0  
 LB 0.30 Hz  
 GB 0  
 PC 0.60

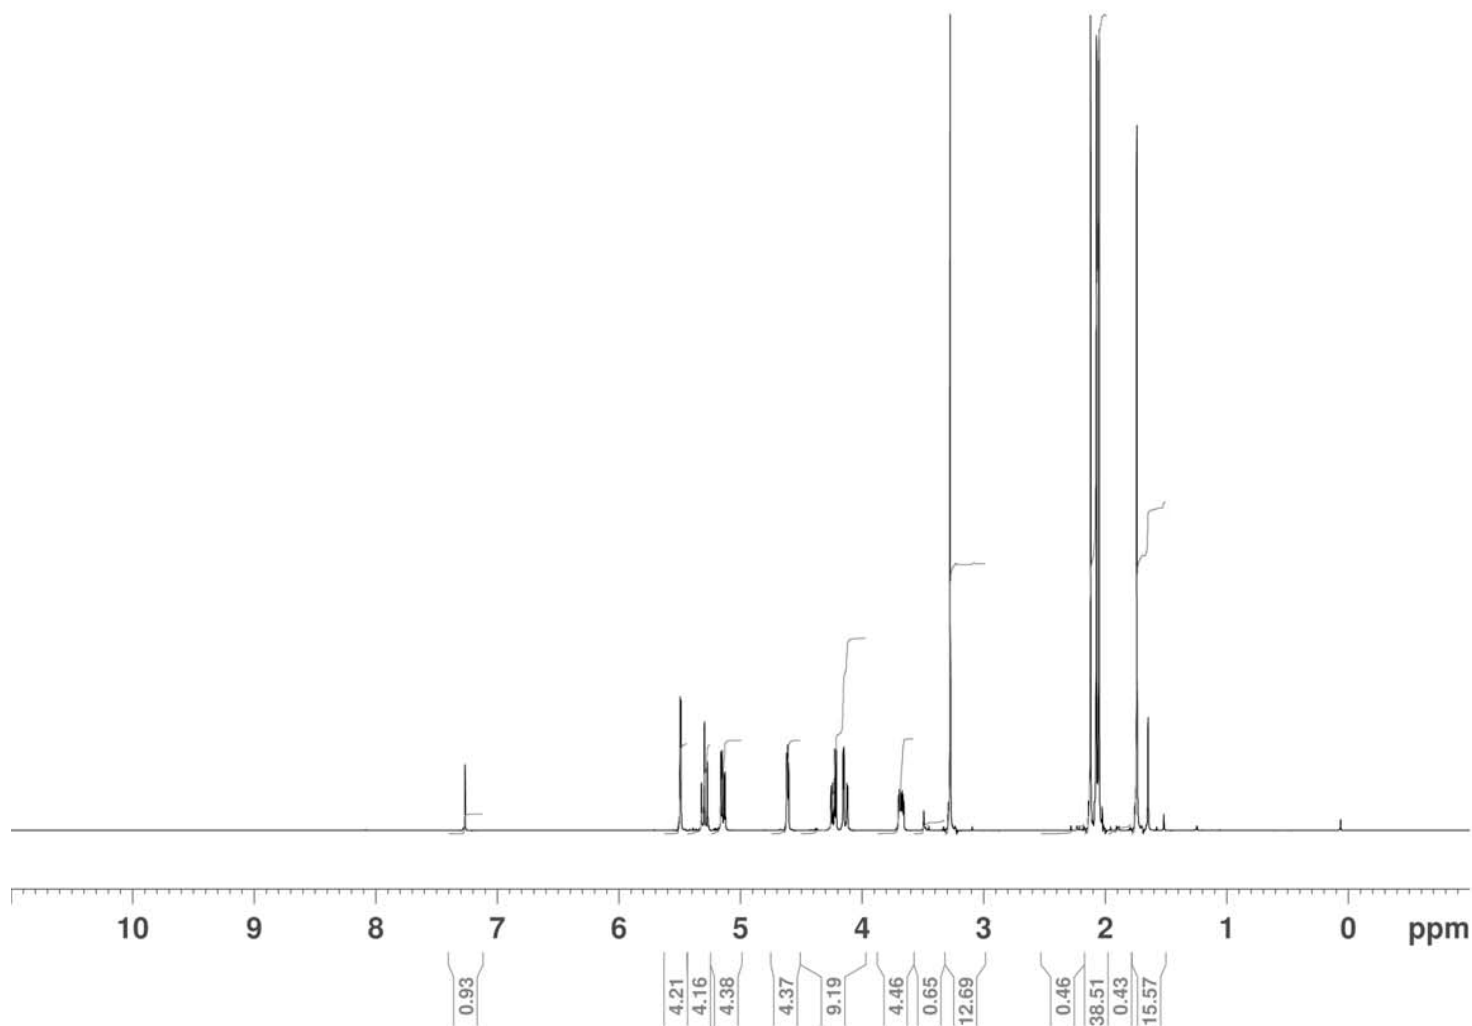

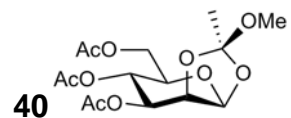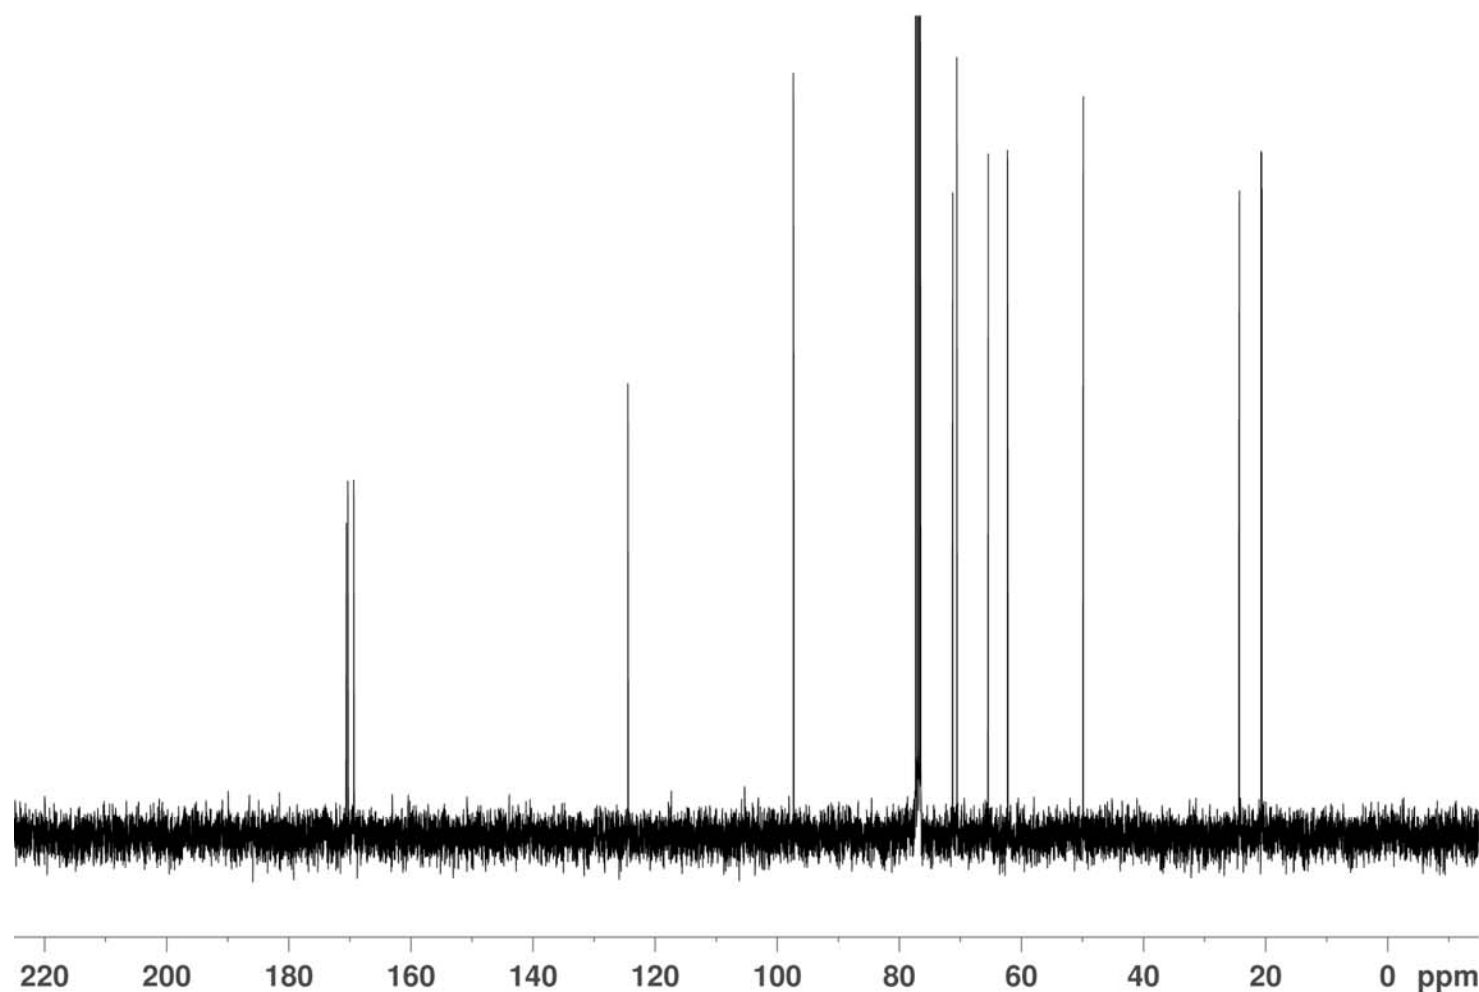

NMR@CHEM.OX

```

NAME      Mar30-2010-23
EXPNO     2
PROCNO    1
Date_     20100330
Time      10.37
INSTRUM   av400
PROBHD    5 mm QNP 1H/13
PULPROG   zgpg30
TD         32768
SOLVENT   CDC13
NS         256
DS         4
SWH        26178.010 Hz
FIDRES     0.798889 Hz
AQ         0.6259188 sec
RG         32768
DW         19.100 usec
DE         7.50 usec
TE         300.0 K
D1         1.00000000 sec
D11        0.03000000 sec
TD0        1
  
```

```

===== CHANNEL f1 =====
NUC1      13C
P1         9.50 usec
PL1        0.00 dB
SFO1      100.6403931 MHz
  
```

```

===== CHANNEL f2 =====
CPDPRG2   waltz16
NUC2      1H
PCPD2     80.00 usec
PL2        0.00 dB
PL12      19.00 dB
PL13      25.00 dB
SFO2      400.2016008 MHz
SI         32768
SF         100.6303718 MHz
WDW        EM
SSB         0
LB         1.00 Hz
GB          0
PC         1.40
  
```

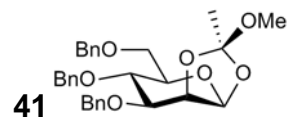

NMRO@CHEM.OX

NAME Mar30-2010-22  
 EXPNO 1  
 PROCNO 1  
 Date\_ 20100330  
 Time 10.04  
 INSTRUM av400  
 PROBHD 5 mm QNP 1H/13  
 PULPROG zg60  
 TD 65536  
 SOLVENT CDC13  
 NS 16  
 DS 2  
 SWH 8278.146 Hz  
 FIDRES 0.126314 Hz  
 AQ 3.9584243 sec  
 RG 90.5  
 DW 60.400 usec  
 DE 7.50 usec  
 TE 300.0 K  
 D1 1.00000000 sec

===== CHANNEL f1 =====  
 NUC1 1H  
 P1 9.00 usec  
 PL1 0.00 dB  
 SFO1 400.2024714 MHz  
 SI 32768  
 SF 400.2000028 MHz  
 WDW EM  
 SSB 0  
 LB 0.30 Hz  
 GB 0  
 PC 1.00

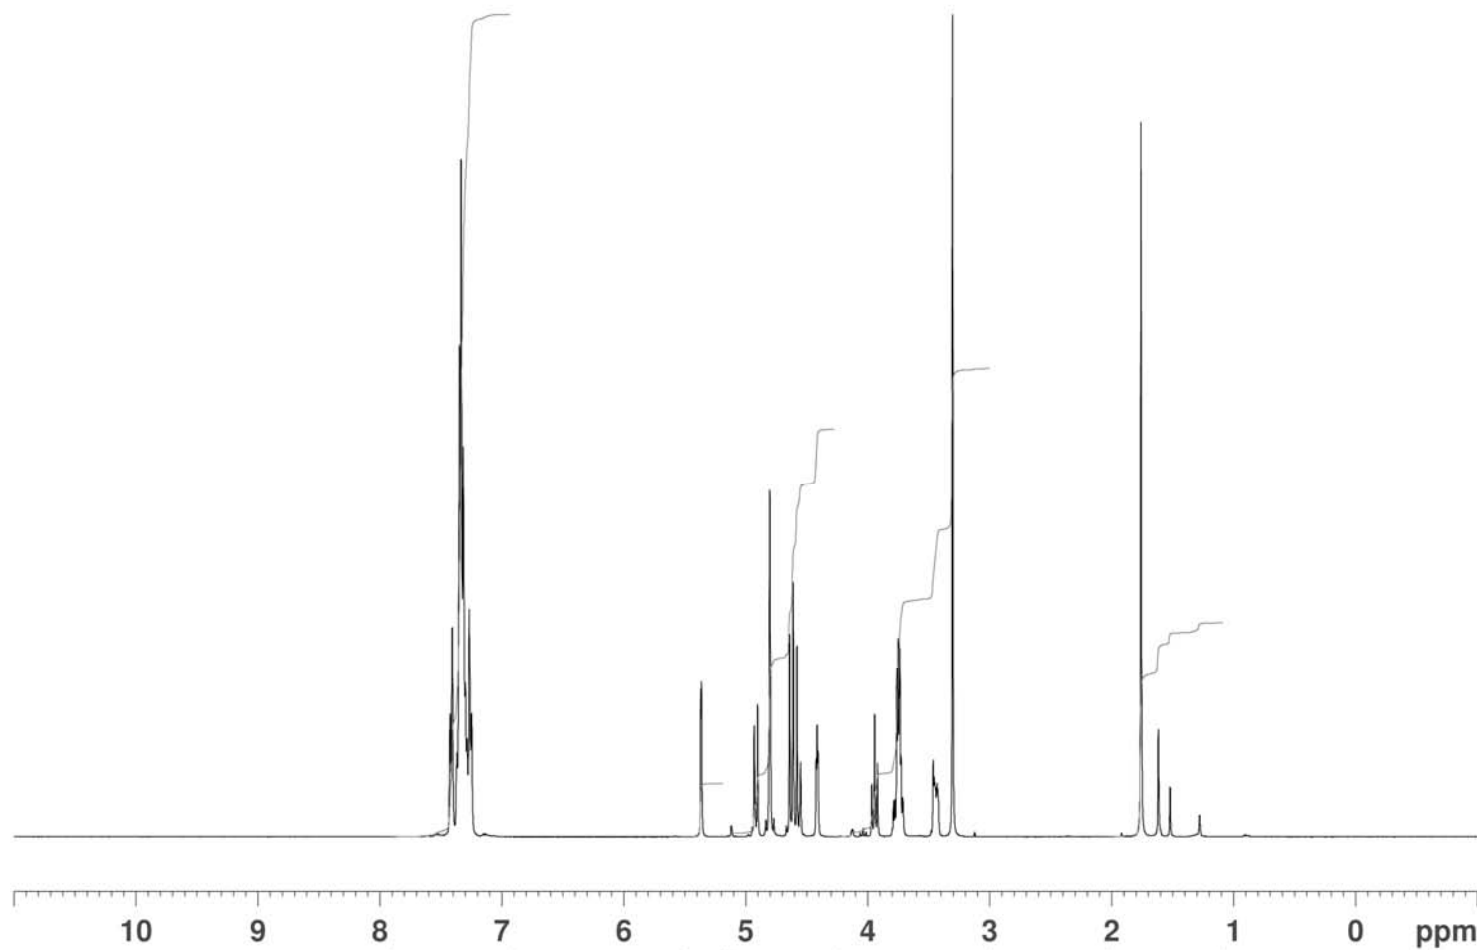

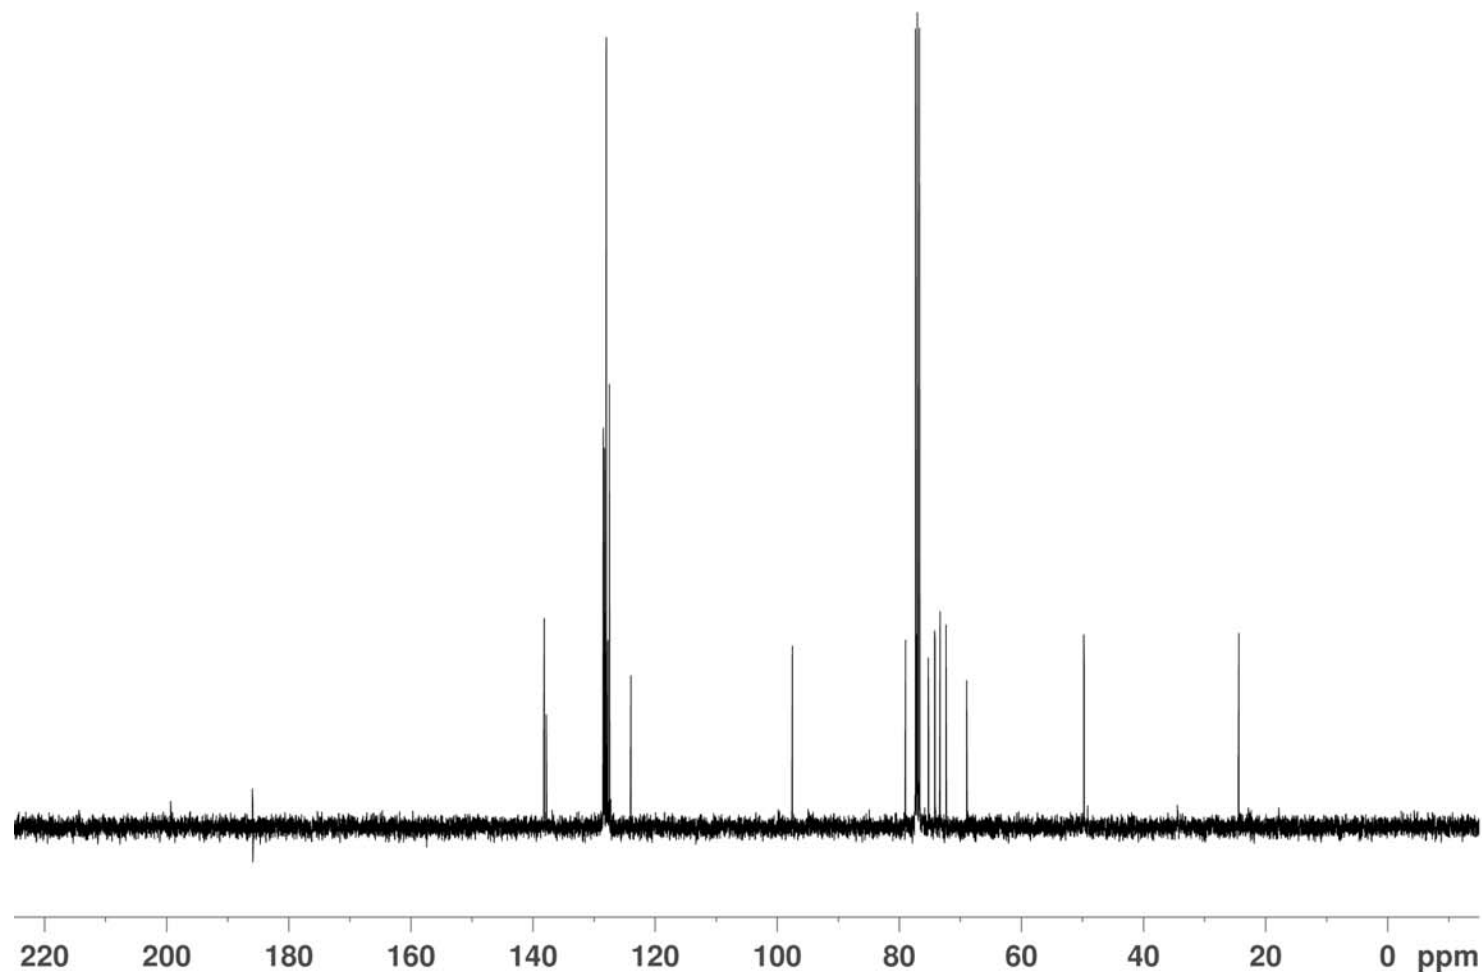

NMR@CHEM.OX

```

NAME      Mar30-2010-22
EXPNO     2
PROCNO    1
Date_     20100330
Time      10.12
INSTRUM   av400
PROBHD    5 mm QNP 1H/13
PULPROG   zgpg30
TD         32768
SOLVENT   CDC13
NS         256
DS         4
SWH        26178.010 Hz
FIDRES     0.798889 Hz
AQ         0.6259188 sec
RG         32768
DW         19.100 usec
DE         7.50 usec
TE         300.0 K
D1         1.00000000 sec
D11        0.03000000 sec
TD0        1
  
```

```

===== CHANNEL f1 =====
NUC1      13C
P1         9.50 usec
PL1        0.00 dB
SFO1      100.6403931 MHz
  
```

```

===== CHANNEL f2 =====
CPDPRG2   waltz16
NUC2       1H
PCPD2     80.00 usec
PL2        0.00 dB
PL12      19.00 dB
PL13      25.00 dB
SFO2      400.2016008 MHz
SI         32768
SF         100.6303718 MHz
WDW        EM
SSB        0
LB         1.00 Hz
GB         0
PC         1.40
  
```

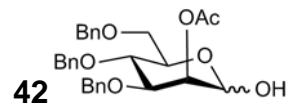

NMROCHEM.OX

NAME Apr21-2010-60  
 EXPNO 1  
 PROCNO 1  
 Date\_ 20100421  
 Time 20.44  
 INSTRUM av400  
 PROBHD 5 mm QNP 1H/13  
 PULPROG zg60  
 TD 65536  
 SOLVENT CDC13  
 NS 16  
 DS 2  
 SWH 8278.146 Hz  
 FIDRES 0.126314 Hz  
 AQ 3.9584243 sec  
 RG 35.9  
 DW 60.400 usec  
 DE 7.50 usec  
 TE 300.0 K  
 D1 1.00000000 sec

===== CHANNEL f1 =====  
 NUC1 1H  
 P1 9.00 usec  
 PL1 0.00 dB  
 SFO1 400.2024714 MHz  
 SI 32768  
 SF 400.2000028 MHz  
 WDW EM  
 SSB 0  
 LB 0.30 Hz  
 GB 0  
 PC 1.00

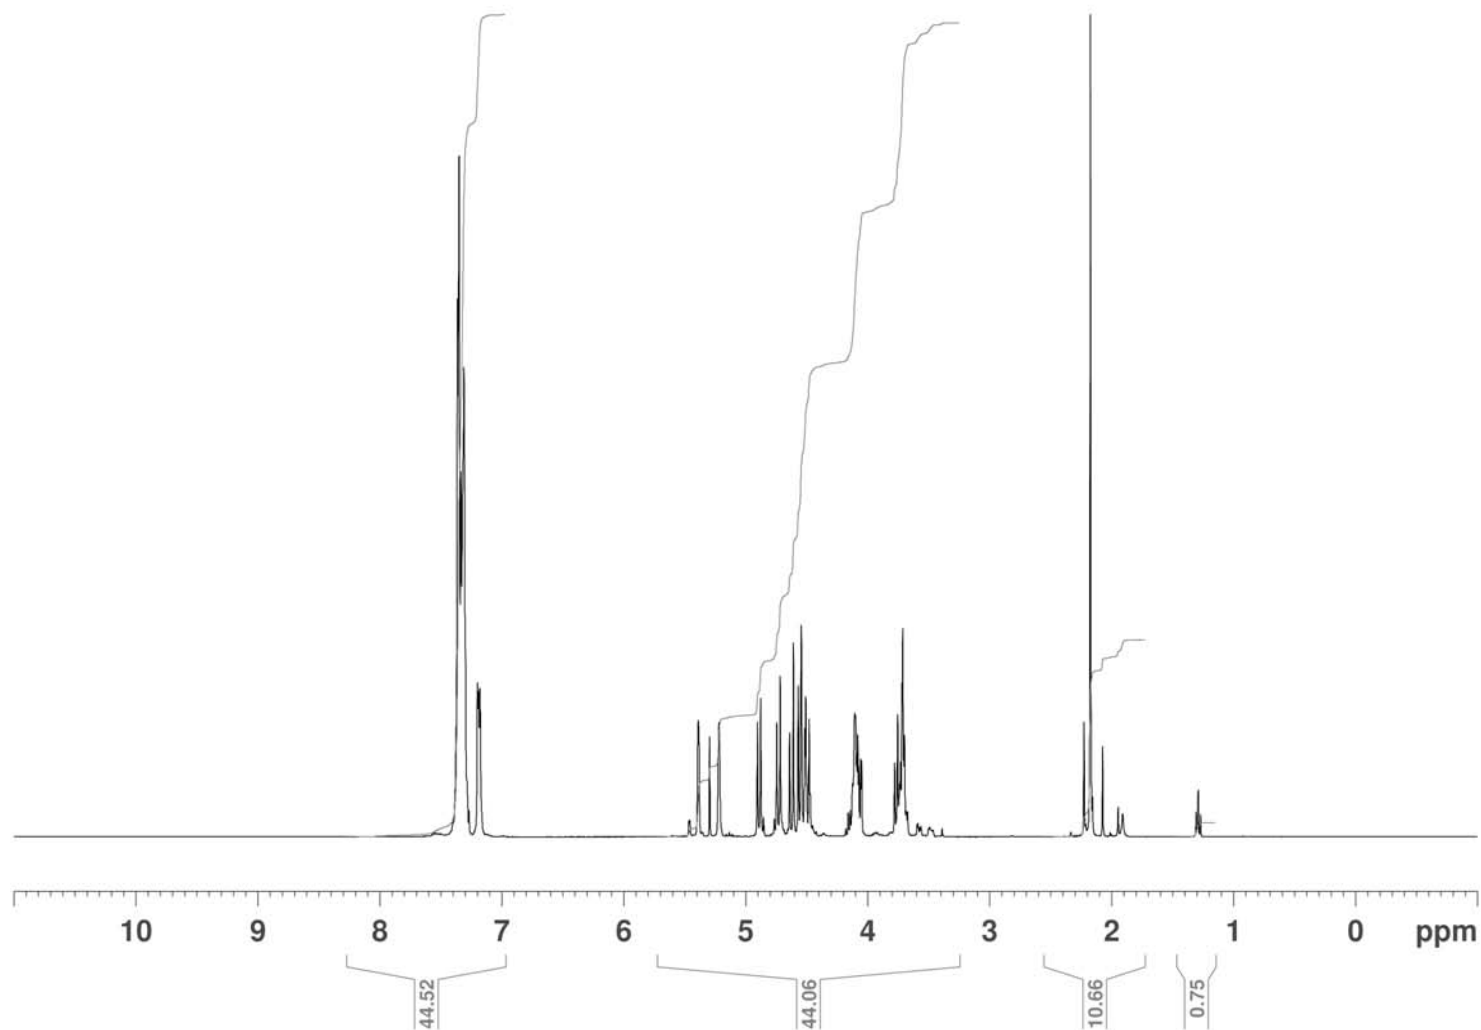



NMR@CHEM.OX

```

NAME      Apr21-2010-60
EXPNO     2
PROCNO    1
Date_     20100421
Time      20.51
INSTRUM   av400
PROBHD    5 mm QNP 1H/13
PULPROG   zgpg30
TD         32768
SOLVENT   CDC13
NS         256
DS         4
SWH        26178.010 Hz
FIDRES     0.798889 Hz
AQ         0.6259188 sec
RG         32768
DW         19.100 usec
DE         7.50 usec
TE         300.0 K
D1         1.0000000 sec
D11        0.0300000 sec
TD0        1
  
```

```

===== CHANNEL f1 =====
NUC1      13C
P1         9.50 usec
PL1        0.00 dB
SFO1      100.6403931 MHz
  
```

```

===== CHANNEL f2 =====
CPDPRG2   waltz16
NUC2       1H
PCPD2     80.00 usec
PL2        0.00 dB
PL12       19.00 dB
PL13       25.00 dB
SFO2      400.2016008 MHz
SI         32768
SF         100.6303718 MHz
WDW        EM
SSB         0
LB         1.00 Hz
GB         0
PC         1.40
  
```

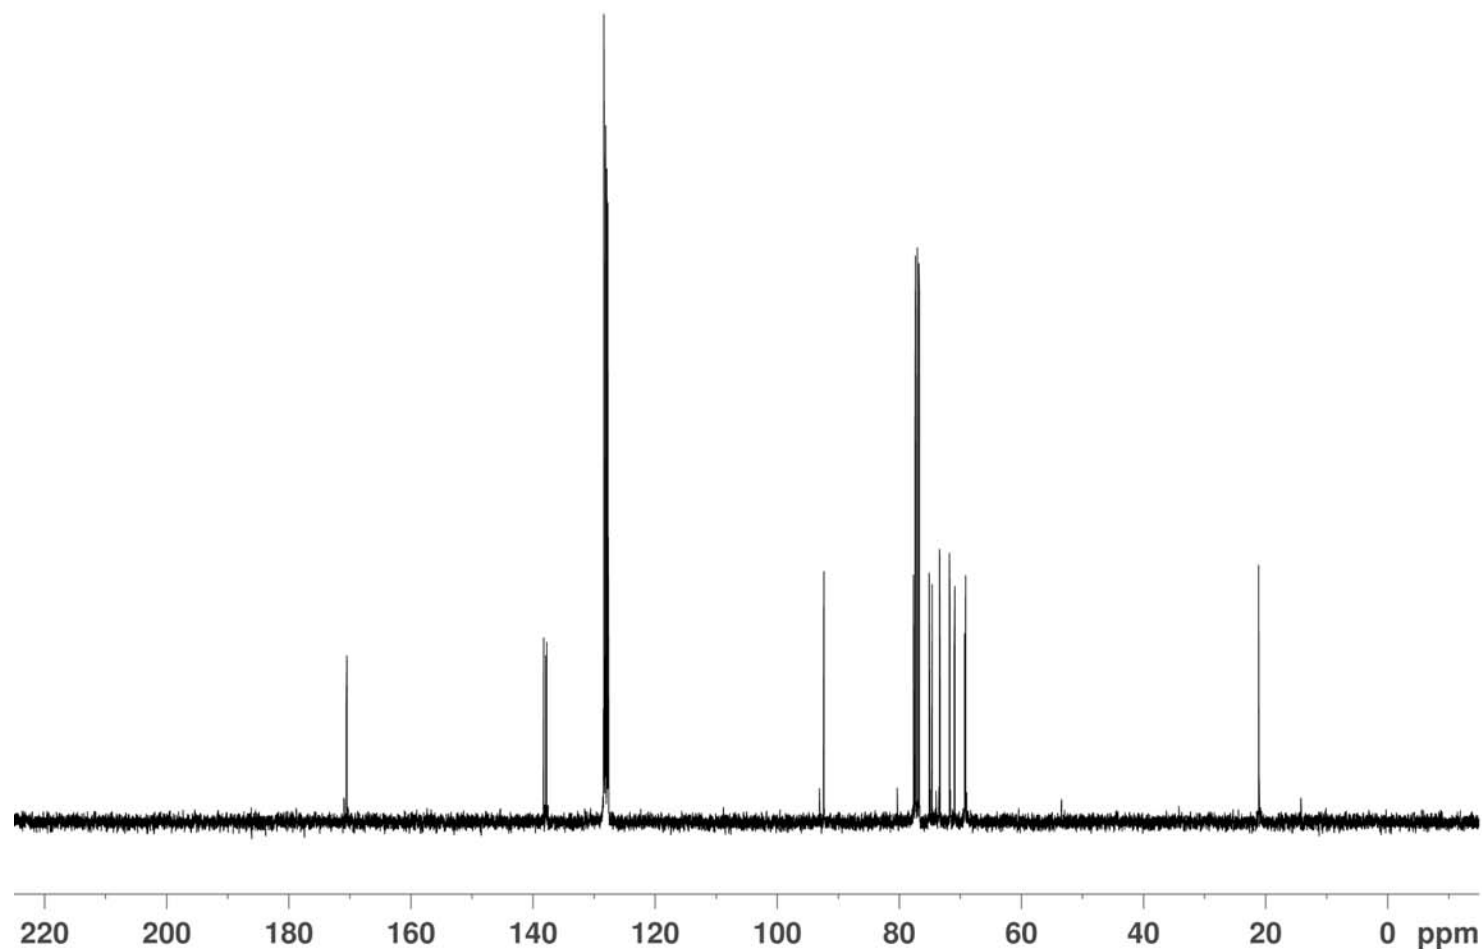

18

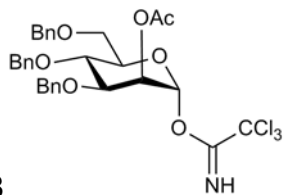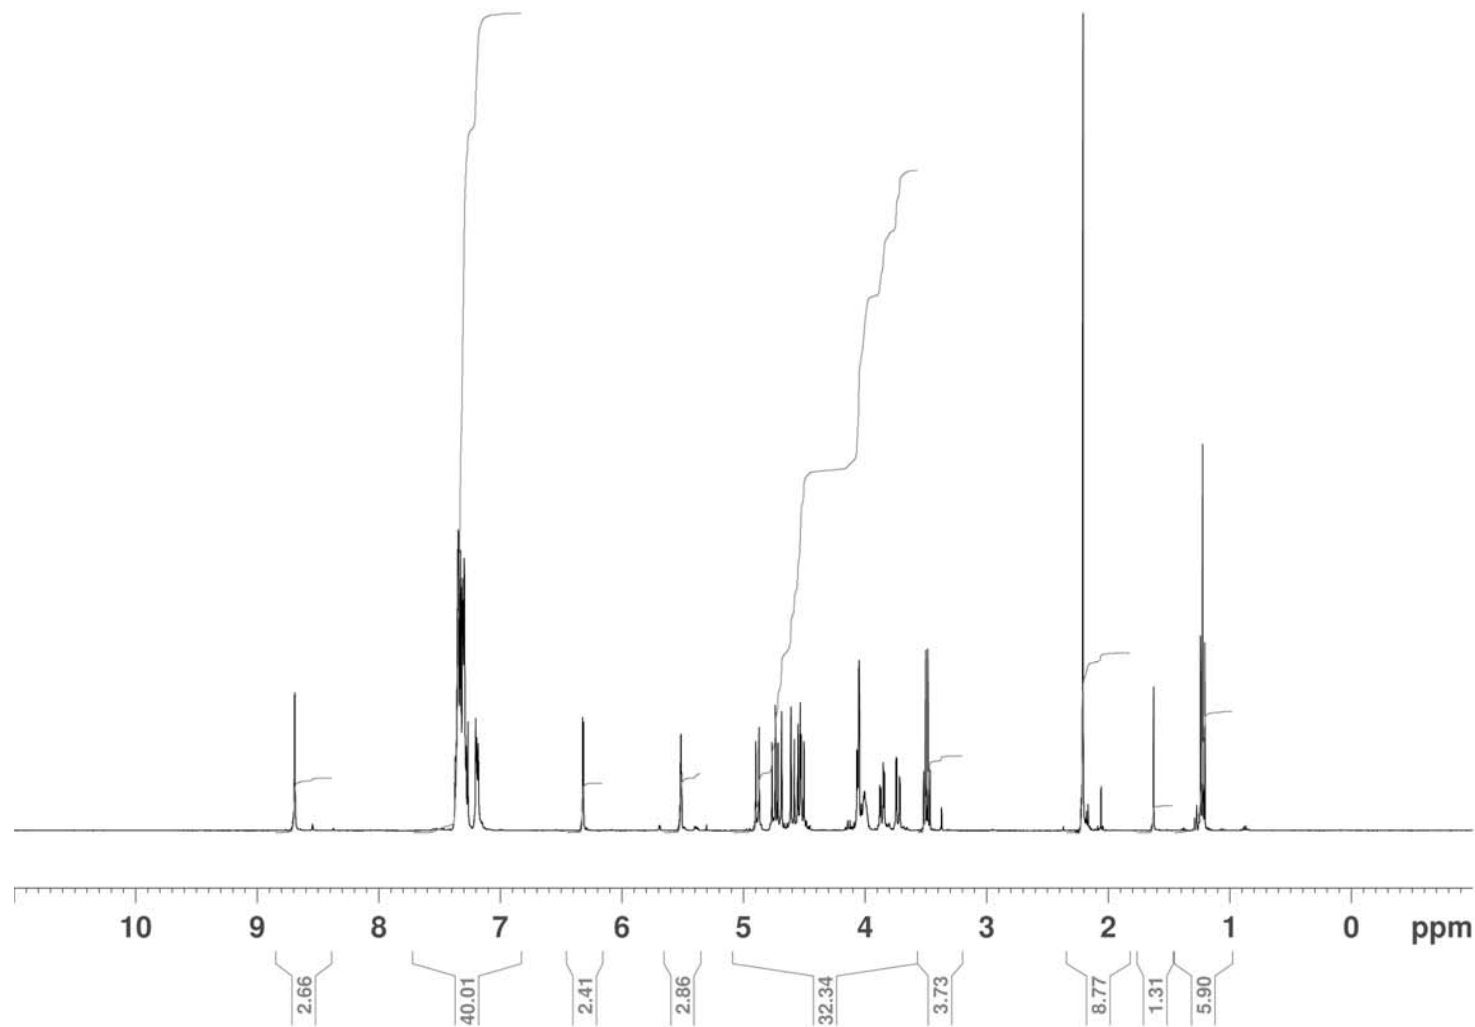

# NMR@CHEM.OX

Current Data Parameters  
 NAME Sep17-2009-20  
 EXPNO 1  
 PROCNO 1

F2 - Acquisition Parameters  
 Date\_ 20090917  
 Time 19.38  
 INSTRUM dpx400  
 PROBHD 5 mm Dual 1H/1  
 PULPROG zg60  
 TD 32768  
 SOLVENT CDCl3  
 NS 16  
 DS 2  
 SWH 5592.841 Hz  
 FIDRES 0.170680 Hz  
 AQ 2.9295092 sec  
 RG 45.3  
 DW 89.400 usec  
 DE 17.00 usec  
 TE 300.0 K  
 D1 1.00000000 sec

===== CHANNEL f1 =====  
 NUC1 1H  
 P1 7.30 usec  
 PL1 0.00 dB  
 SFO1 400.1320007 MHz

F2 - Processing parameters  
 SI 32768  
 SF 400.1300182 MHz  
 WDW EM  
 SSB 0  
 LB 0.30 Hz  
 GB 0  
 PC 0.60



18

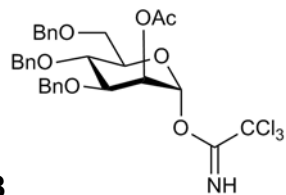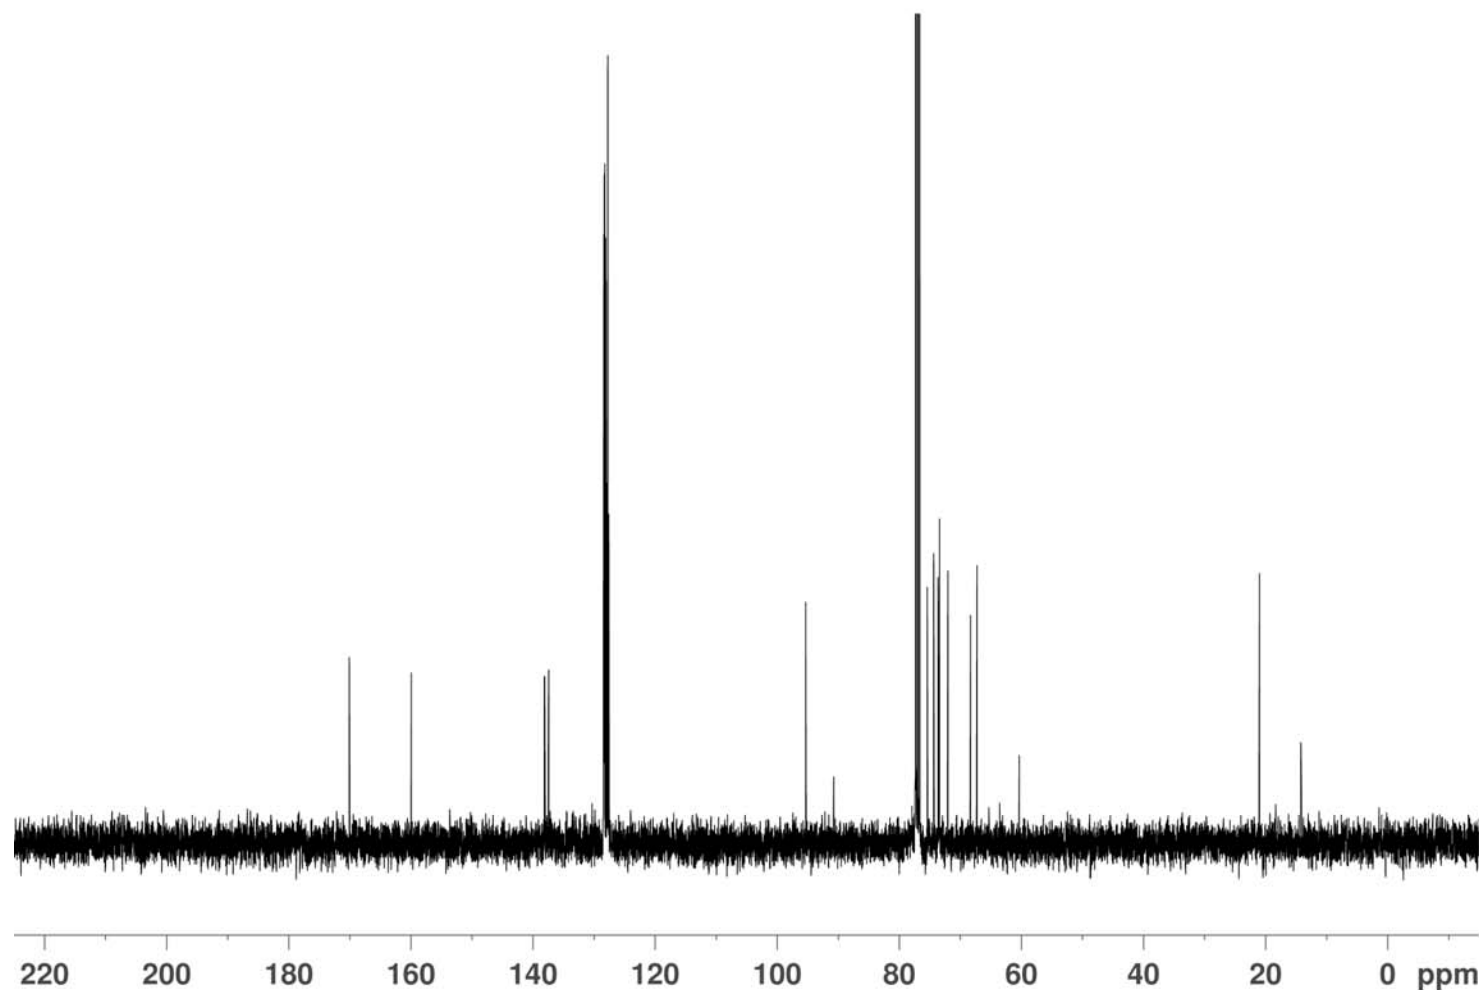

NMR@CHEM.OX

```

NAME      Feb10-2010-35
EXPNO     2
PROCNO    1
Date_     20100210
Time      20.09
INSTRUM   av400
PROBHD    5 mm QNP 1H/13
PULPROG   zgpg30
TD         32768
SOLVENT   CDCl3
NS         256
DS         4
SWH        26178.010 Hz
FIDRES     0.798889 Hz
AQ         0.6259188 sec
RG         32768
DW         19.100 usec
DE         7.50 usec
TE         300.0 K
D1         1.00000000 sec
D11        0.03000000 sec
TD0        1
  
```

```

===== CHANNEL f1 =====
NUC1      13C
P1         9.50 usec
PL1        0.00 dB
SFO1      100.6403931 MHz
  
```

```

===== CHANNEL f2 =====
CPDPRG2   waltz16
NUC2       1H
PCPD2     80.00 usec
PL2        0.00 dB
PL12      19.00 dB
PL13      25.00 dB
SFO2      400.2016008 MHz
SI         32768
SF         100.6303718 MHz
WDW        EM
SSB        0
LB         1.00 Hz
GB         0
PC         1.40
  
```

NMRO@CHEM.OX

```

NAME          cb97160807
EXPNO         1
PROCNO        1
Date_         20100708
Time          19.07
INSTRUM       avc500
PROBHD        5 mm CPDUL 13C
PULPROG       zg30
TD            65536
SOLVENT       CDC13
NS            16
DS            2
SWH           10330.578 Hz
FIDRES        0.157632 Hz
AQ            3.1719923 sec
RG            4
DW            48.400 usec
DE            6.00 usec
TE            298.0 K
D1            1.00000000 sec
TDO           1
  
```

```

===== CHANNEL f1 =====
NUC1          1H
P1            9.60 usec
PL1           -6.00 dB
PL1W         15.19999981 W
SFO1         500.3030896 MHz
SI           32768
SF           500.3000240 MHz
WDW           EM
SSB           0
LB            0.30 Hz
GB            0
PC            1.00
  
```

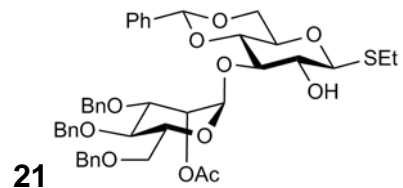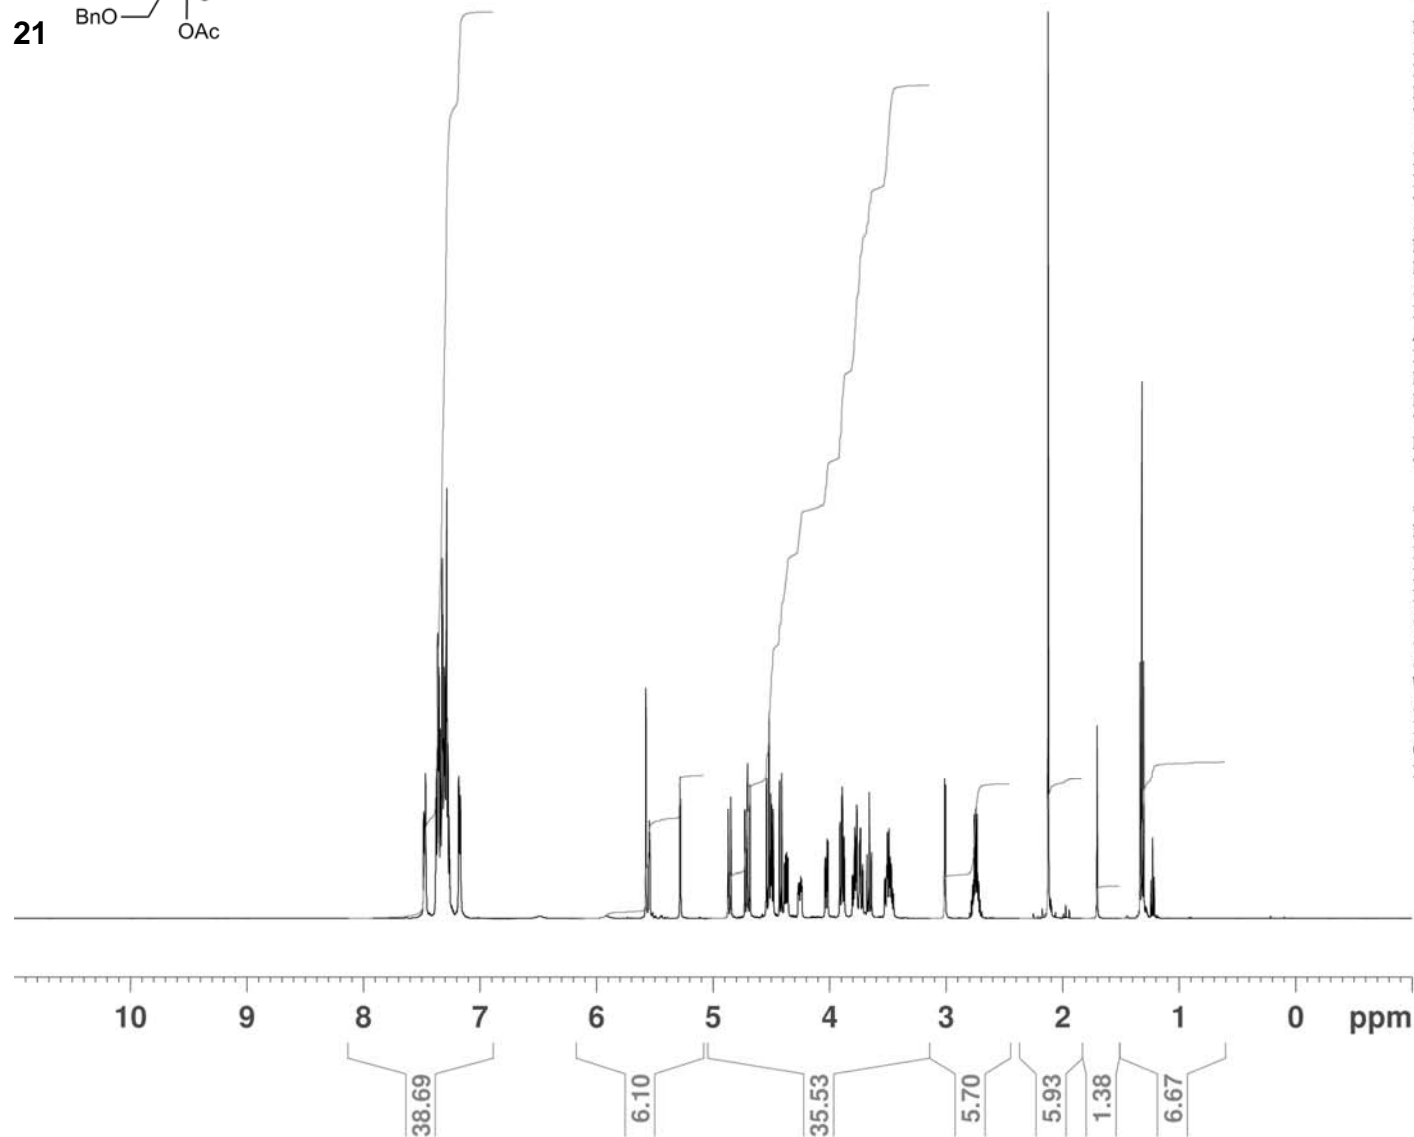

NMROCHEM.OX

```

NAME          cb97160807
EXPNO         4
PROCNO        1
Date_         20100708
Time          20.16
INSTRUM       avc500
PROBHD        5 mm CPDUL 13C
PULPROG       zgpg30
TD            65536
SOLVENT       CDC13
NS            1024
DS            2
SWH           31250.000 Hz
FIDRES        0.476837 Hz
AQ            1.0486259 sec
RG            1820
DW            16.000 usec
DE            20.00 usec
TE            298.0 K
D1            2.00000000 sec
D11           0.03000000 sec
TD0           1
  
```

```

===== CHANNEL f1 =====
NUC1          13C
P1            9.50 usec
PL1           -4.40 dB
PL1W          28.15752029 W
SFO1          125.8131151 MHz
  
```

```

===== CHANNEL f2 =====
CPDPRG2       waltz16
NUC2          1H
PCPD2         80.00 usec
PL2           -6.00 dB
PL12          12.42 dB
PL13          120.00 dB
PL2W          15.19999981 W
PL12W         0.21869738 W
PL13W         0.00000000 W
SFO2          500.3020012 MHz
SI            32768
SF            125.8005438 MHz
WDW           EM
SSB           0
LB            1.00 Hz
GB            0
PC            1.40
  
```

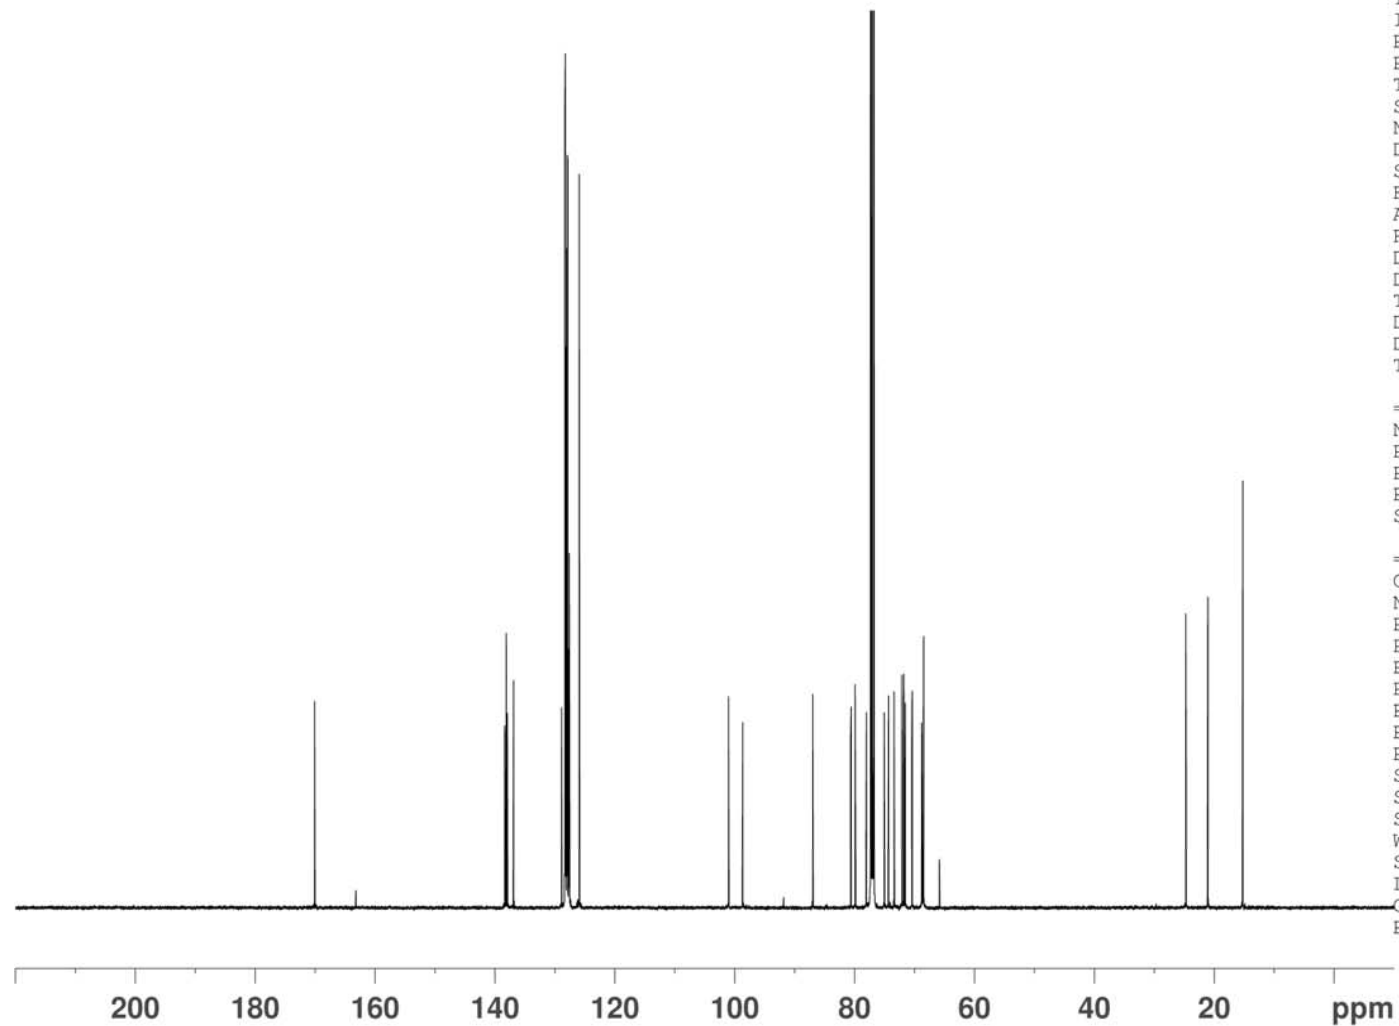

22

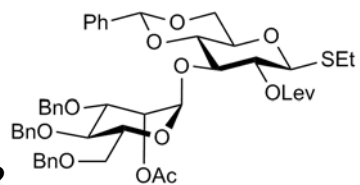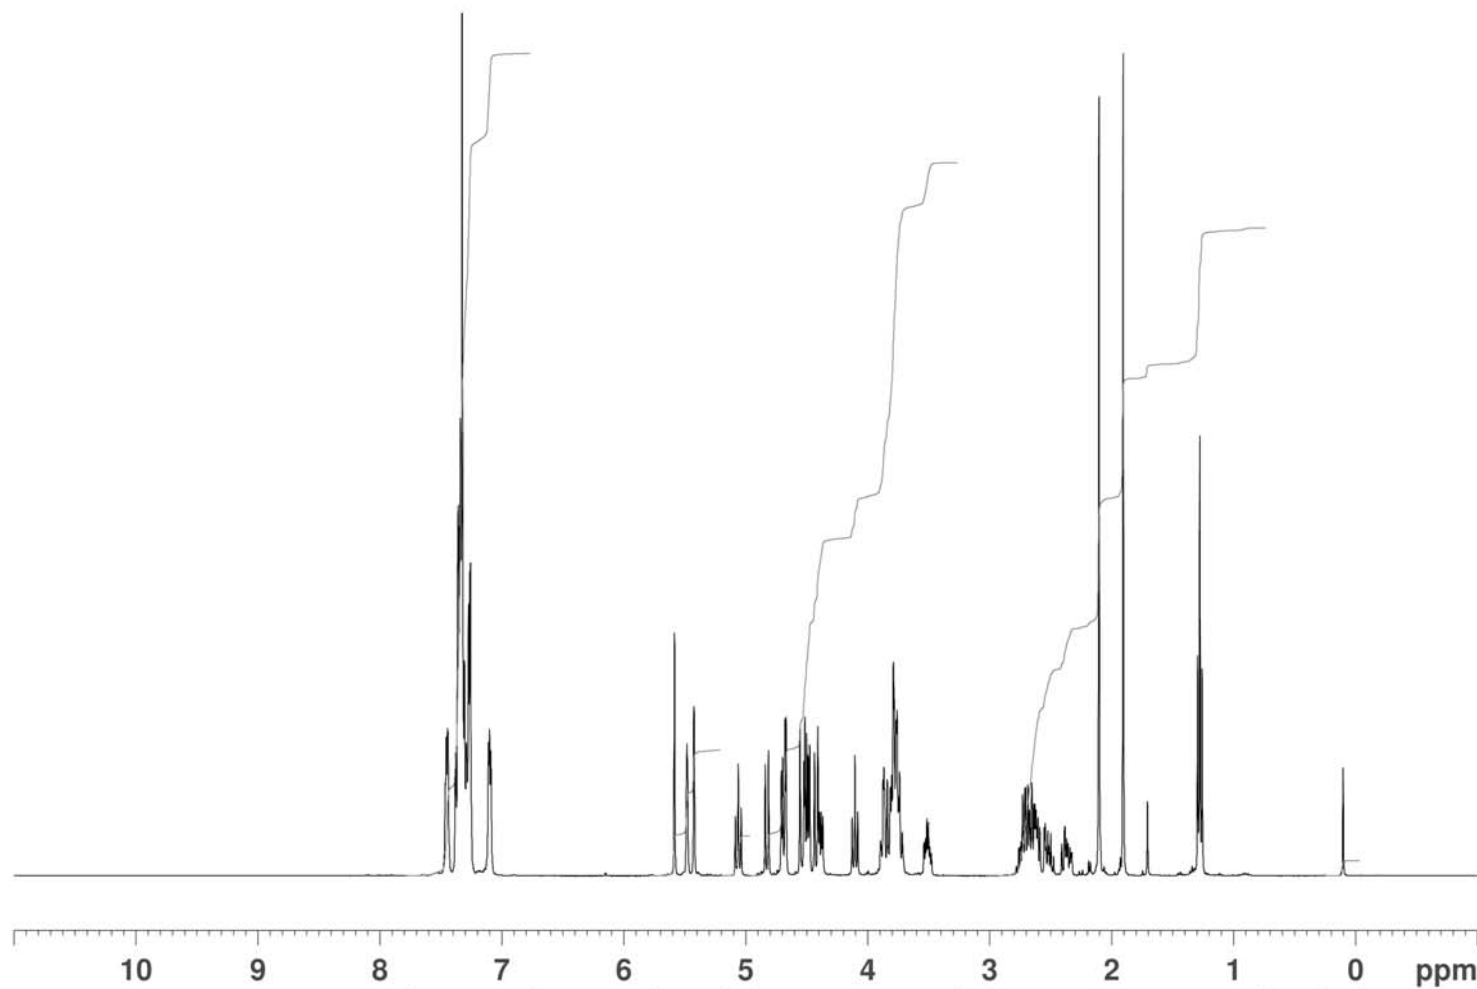

# NMR@CHEM.OX

NAME Apr21-2010-59  
 EXPNO 1  
 PROCNO 1  
 Date\_ 20100421  
 Time 20.18  
 INSTRUM av400  
 PROBHD 5 mm QNP 1H/13  
 PULPROG zg60  
 TD 65536  
 SOLVENT CDCl3  
 NS 16  
 DS 2  
 SWH 8278.146 Hz  
 FIDRES 0.126314 Hz  
 AQ 3.9584243 sec  
 RG 35.9  
 DW 60.400 usec  
 DE 7.50 usec  
 TE 300.0 K  
 D1 1.00000000 sec

===== CHANNEL f1 =====  
 NUC1 1H  
 P1 9.00 usec  
 PL1 0.00 dB  
 SFO1 400.2024714 MHz  
 SI 32768  
 SF 400.2000028 MHz  
 WDW EM  
 SSB 0  
 LB 0.30 Hz  
 GB 0  
 PC 1.00

22

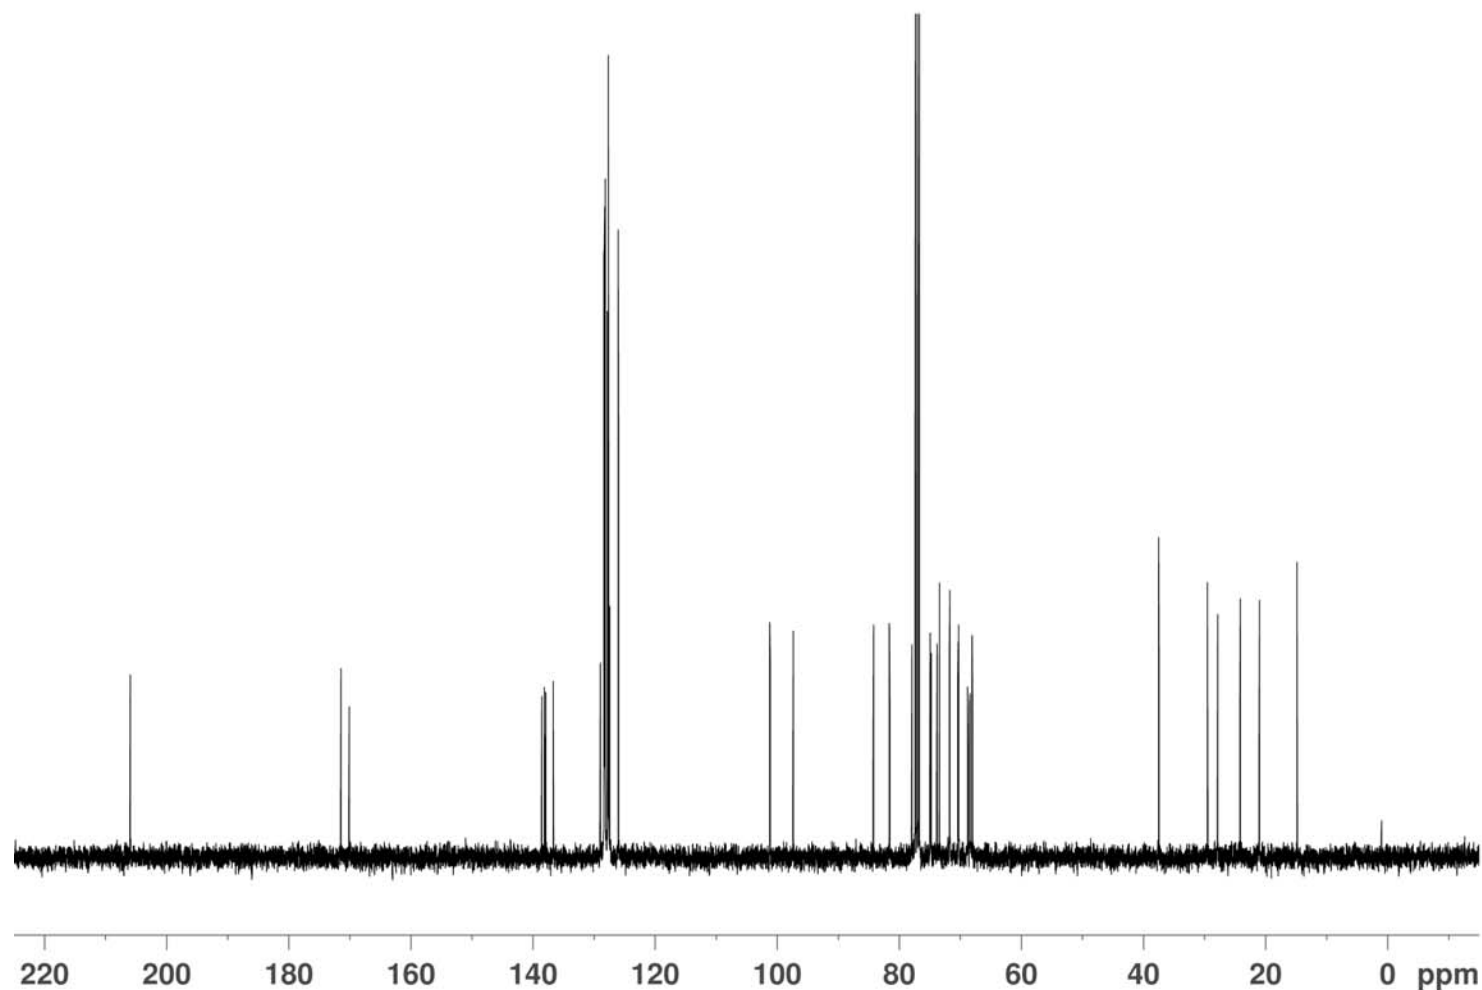

# NMR@CHEM.OX

```

NAME      Apr21-2010-59
EXPNO     2
PROCNO    1
Date_     20100421
Time      20.26
INSTRUM   av400
PROBHD    5 mm QNP 1H/13
PULPROG   zgpg30
TD         32768
SOLVENT   CDC13
NS         256
DS         4
SWH        26178.010 Hz
FIDRES     0.798889 Hz
AQ         0.6259188 sec
RG         32768
DW         19.100 usec
DE         7.50 usec
TE         300.0 K
D1         1.00000000 sec
D11        0.03000000 sec
TD0        1
  
```

```

===== CHANNEL f1 =====
NUC1      13C
P1         9.50 usec
PL1        0.00 dB
SFO1      100.6403931 MHz
  
```

```

===== CHANNEL f2 =====
CPDPRG2   waltz16
NUC2      1H
PCPD2     80.00 usec
PL2        0.00 dB
PL12      19.00 dB
PL13      25.00 dB
SFO2      400.2016008 MHz
SI         32768
SF         100.6303718 MHz
WDW        EM
SSB         0
LB         1.00 Hz
GB         0
PC         1.40
  
```

NMRO@CHEM.OX

NAME           cb97150807  
 EXPNO           1  
 PROCNO          1  
 Date\_           20100708  
 Time            16.50  
 INSTRUM         avc500  
 PROBHD         5 mm CPDUL 13C  
 PULPROG         zg30  
 TD              65536  
 SOLVENT         CDC13  
 NS              16  
 DS              2  
 SWH             10330.578 Hz  
 FIDRES          0.157632 Hz  
 AQ              3.1719923 sec  
 RG              4  
 DW              48.400 usec  
 DE              6.00 usec  
 TE              298.0 K  
 D1              1.00000000 sec  
 TD0             1

===== CHANNEL f1 =====  
 NUC1            1H  
 P1              9.60 usec  
 PL1             -6.00 dB  
 PL1W            15.19999981 W  
 SFO1            500.3030896 MHz  
 SI              32768  
 SF              500.3000240 MHz  
 WDW             EM  
 SSB             0  
 LB              0.30 Hz  
 GB              0  
 PC              1.00

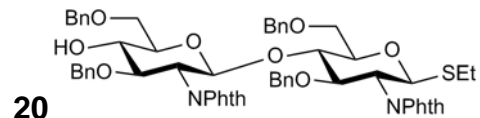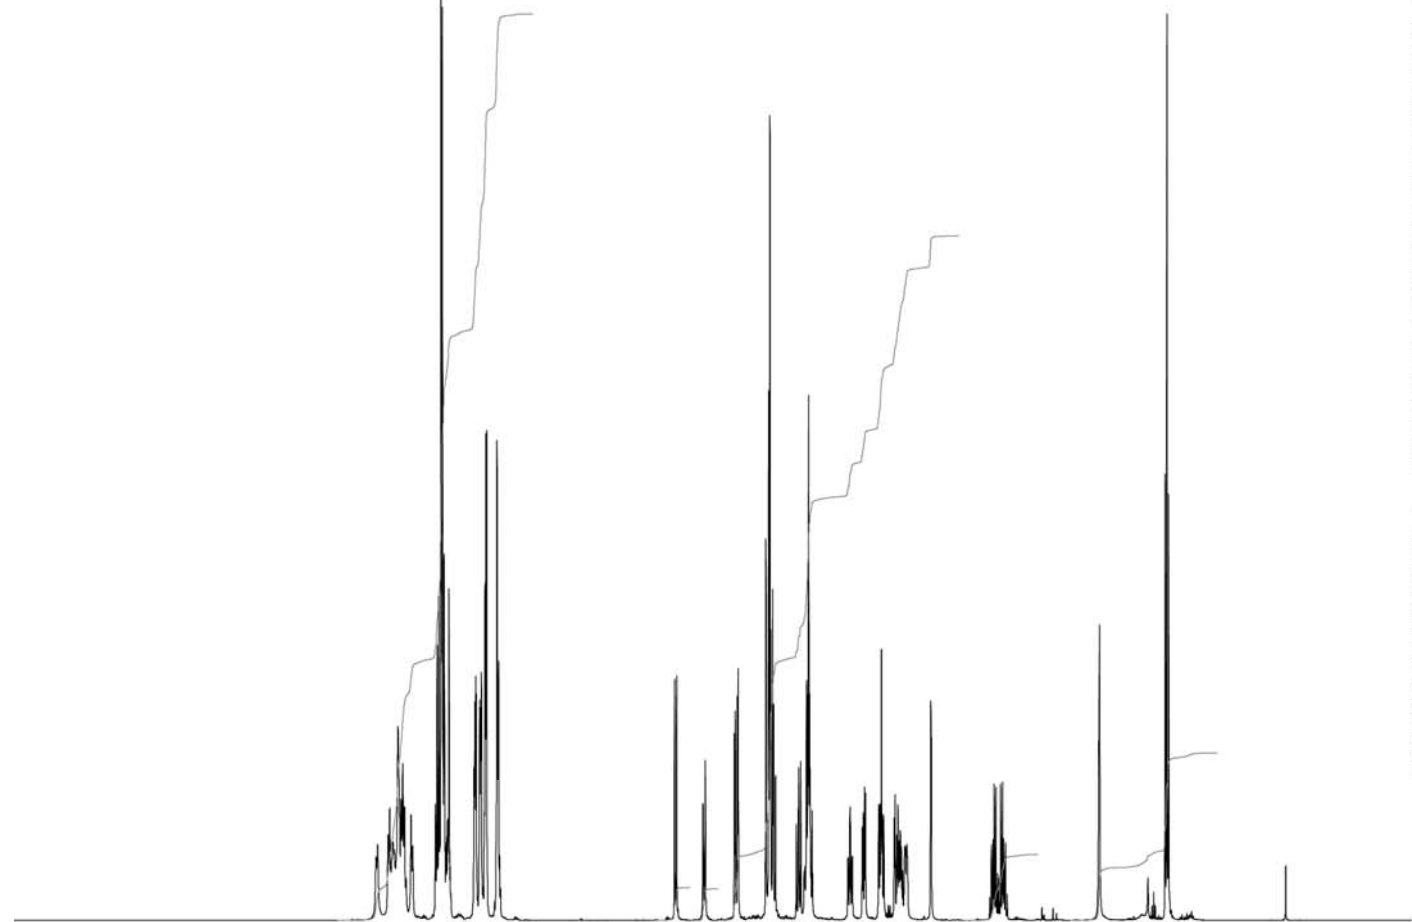

10    9    8    7    6    5    4    3    2    1    0 ppm

48.02  
 1.74  
 1.68  
 36.24  
 3.45  
 8.87

20

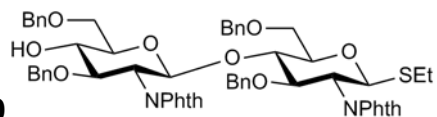

NMROCHEM.OX

```

NAME          cb97150807
EXPNO         4
PROCNO       1
Date_        20100708
Time         18.00
INSTRUM      avc500
PROBHD       5 mm CPDUL 13C
PULPROG      zgpg30
TD           65536
SOLVENT      CDC13
NS           1024
DS           2
SWH          31250.000 Hz
FIDRES       0.476837 Hz
AQ           1.0486259 sec
RG           1820
DW           16.000 usec
DE           20.00 usec
TE           298.0 K
D1           2.00000000 sec
D11          0.03000000 sec
TD0          1
  
```

```

===== CHANNEL f1 =====
NUC1          13C
P1            9.50 usec
PL1           -4.40 dB
PL1W          28.15752029 W
SFO1          125.8131151 MHz
  
```

```

===== CHANNEL f2 =====
CPDPRG2      waltz16
NUC2          1H
PCPD2        80.00 usec
PL2           -6.00 dB
PL12          12.42 dB
PL13          120.00 dB
PL2W          15.19999981 W
PL12W         0.21869738 W
PL13W         0.00000000 W
SFO2          500.3020012 MHz
SI            32768
SF            125.8005438 MHz
WDW           EM
SSB           0
LB            1.00 Hz
GB            0
PC            1.40
  
```

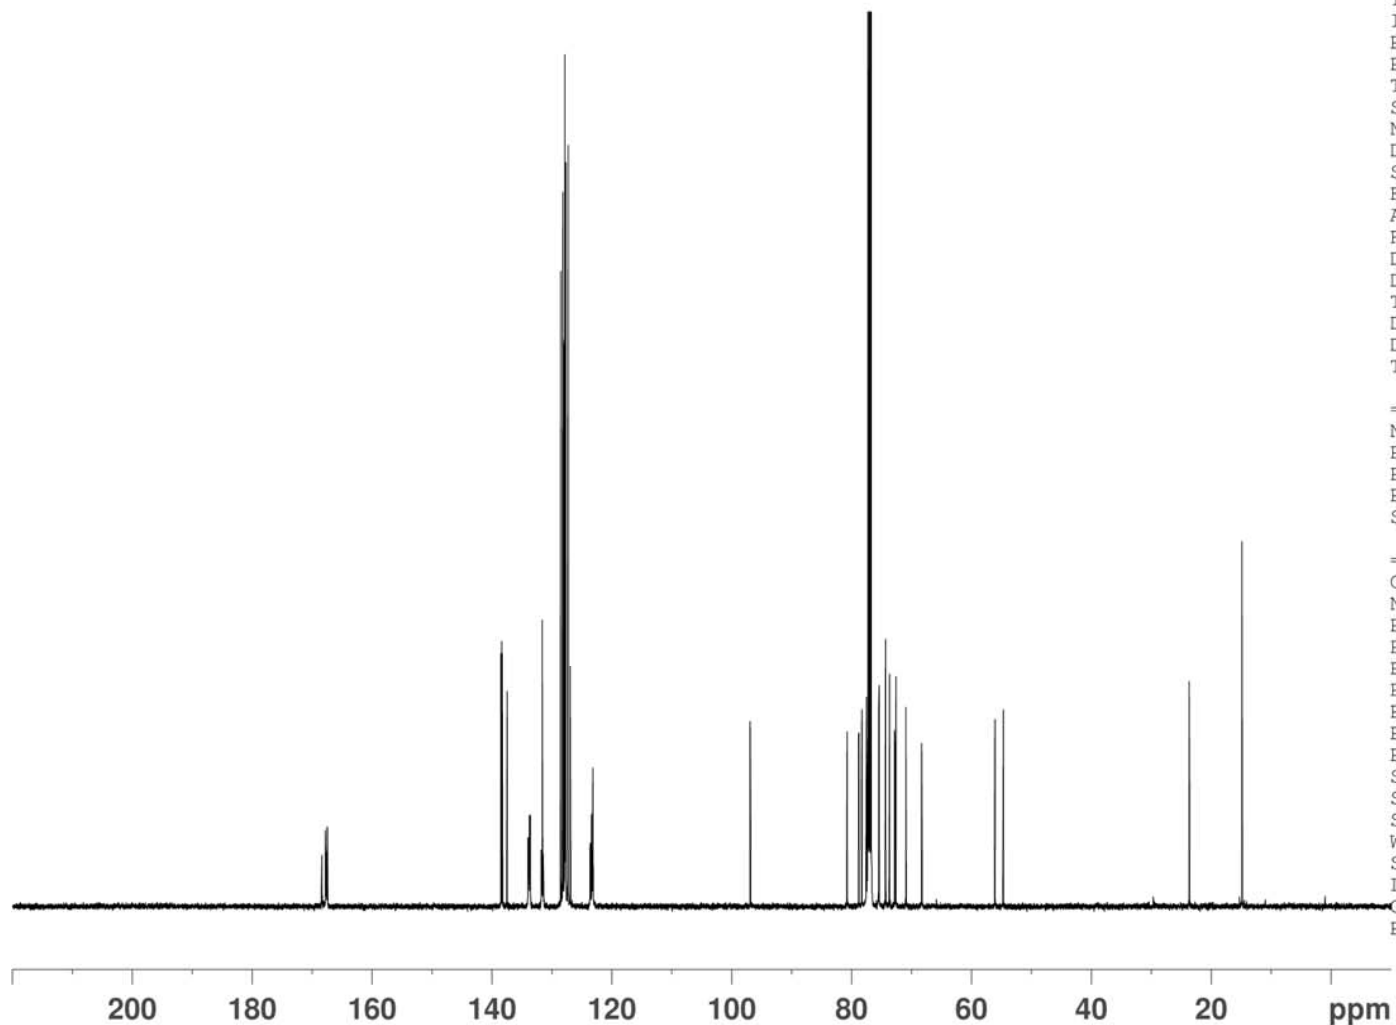

NMRO@CHEM.OX

```

NAME          cb97170807
EXPNO         1
PROCNO        1
Date_         20100708
Time          21.23
INSTRUM       avc500
PROBHD        5 mm CPDUL 13C
PULPROG       zg30
TD            65536
SOLVENT       CDC13
NS            16
DS            2
SWH           10330.578 Hz
FIDRES        0.157632 Hz
AQ            3.1719923 sec
RG            4
DW            48.400 usec
DE            6.00 usec
TE            298.0 K
D1            1.00000000 sec
TD0           1
  
```

```

===== CHANNEL f1 =====
NUC1          1H
P1            9.60 usec
PL1           -6.00 dB
PL1W          15.19999981 W
SFO1          500.3030896 MHz
SI            32768
SF            500.3000240 MHz
WDW           EM
SSB           0
LB            0.30 Hz
GB            0
PC            1.00
  
```

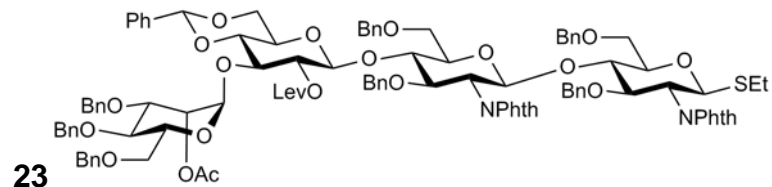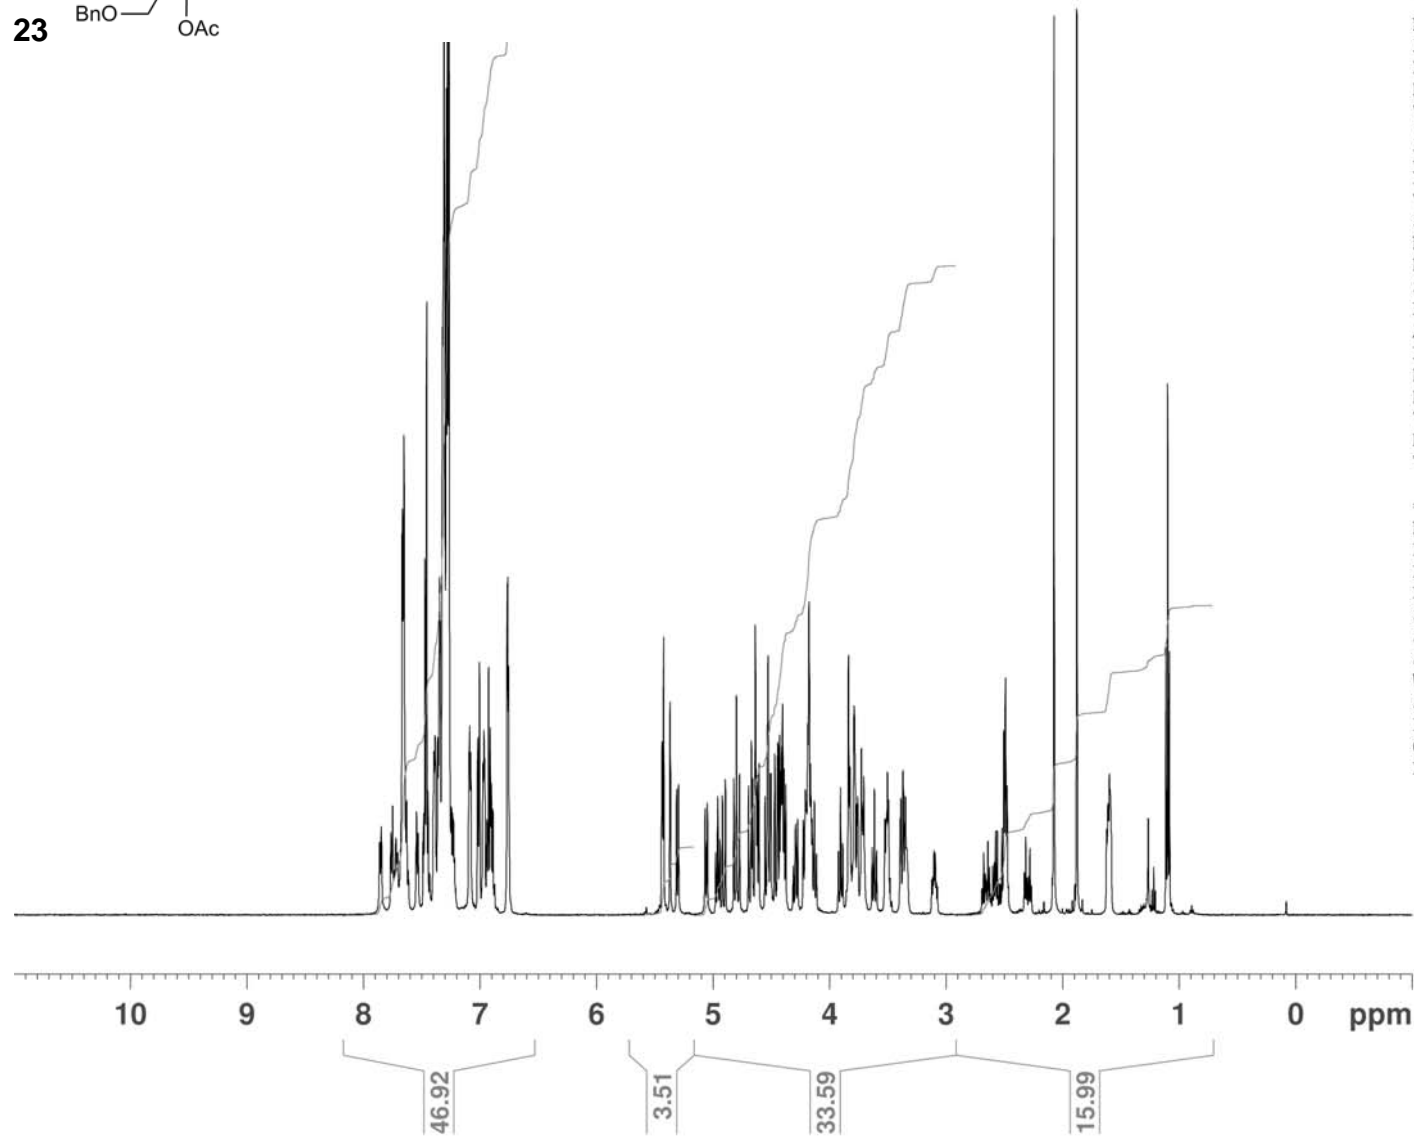



NMROCHEM.OX

23

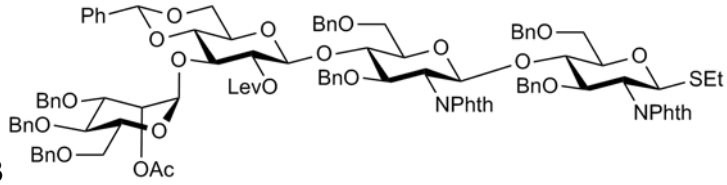

```

NAME          cb97170807
EXPNO         4
PROCNO       1
Date_        20100708
Time         22.33
INSTRUM     avc500
PROBHD      5 mm CPDUL 13C
PULPROG     zgpg30
TD          65536
SOLVENT     CDC13
NS          1024
DS          2
SWH         31250.000 Hz
FIDRES      0.476837 Hz
AQ          1.0486259 sec
RG          1820
DW          16.000 usec
DE          20.00 usec
TE          298.0 K
D1          2.00000000 sec
D11         0.03000000 sec
TD0         1
  
```

```

===== CHANNEL f1 =====
NUC1         13C
P1           9.50 usec
PL1         -4.40 dB
PL1W        28.15752029 W
SFO1        125.8131151 MHz
  
```

```

===== CHANNEL f2 =====
CPDPRG2     waltz16
NUC2         1H
PCPD2       80.00 usec
PL2         -6.00 dB
PL12        12.42 dB
PL13        120.00 dB
PL2W        15.19999981 W
PL12W       0.21869738 W
PL13W       0.00000000 W
SFO2        500.3020012 MHz
SI          32768
SF          125.8005438 MHz
WDW         EM
SSB         0
LB          1.00 Hz
GB          0
PC          1.40
  
```

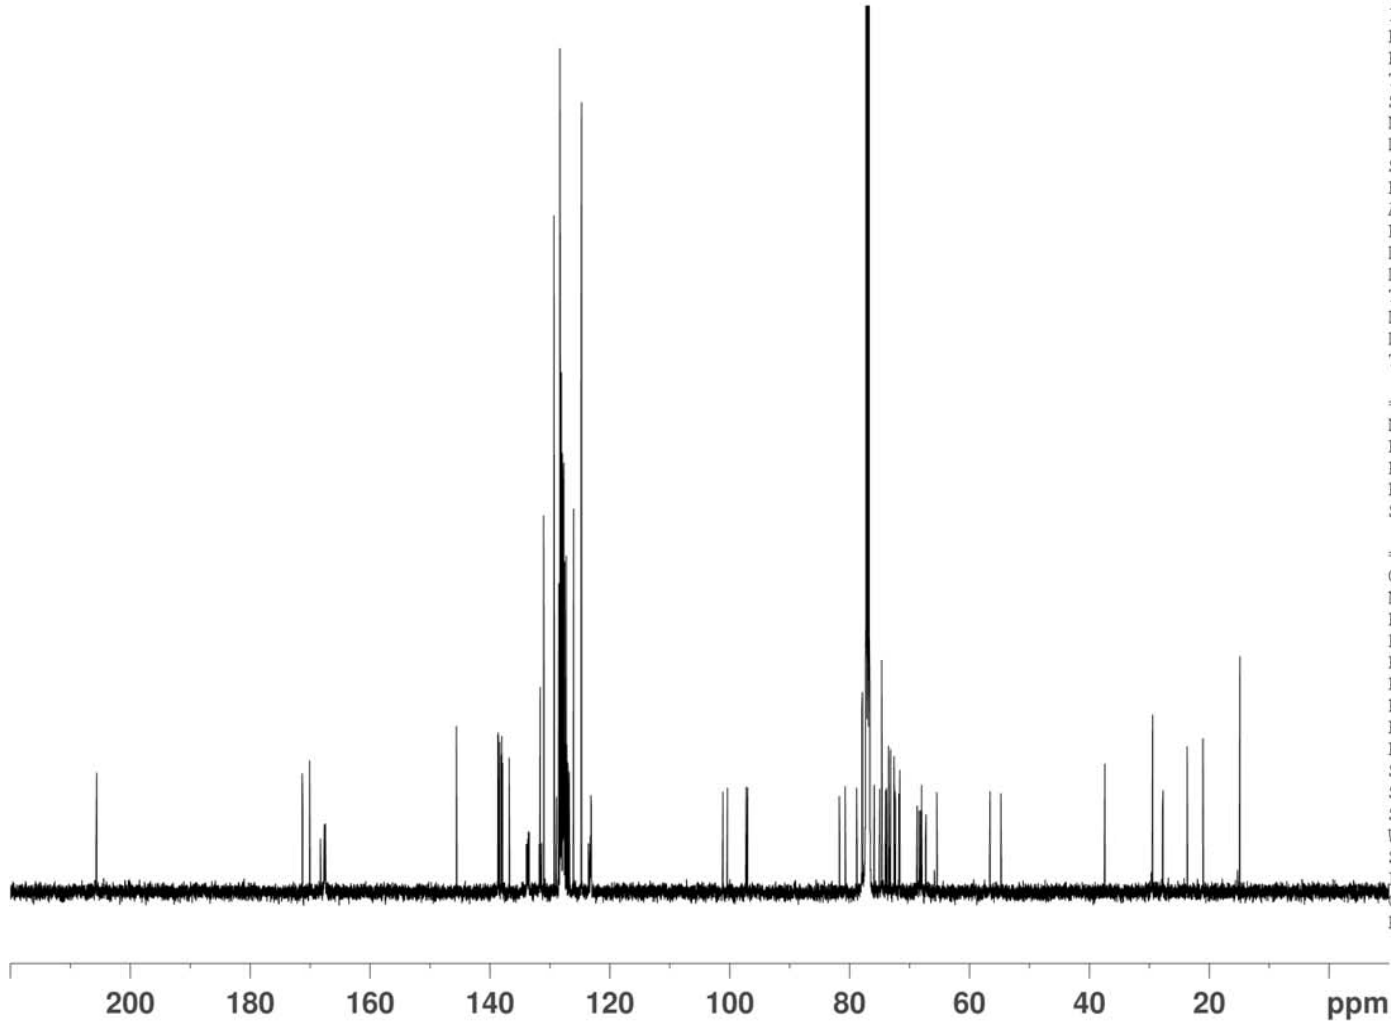

NMRO@CHEM.OX

NAME            cb97180807  
EXPNO           1  
PROCNO          1  
Date\_           20100708  
Time            23.40  
INSTRUM         avc500  
PROBHD         5 mm CPDUL 13C  
PULPROG         zg30  
TD              65536  
SOLVENT         CDCl3  
NS              16  
DS              2  
SWH             10330.578 Hz  
FIDRES          0.157632 Hz  
AQ              3.1719923 sec  
RG              4  
DW              48.400 usec  
DE              6.00 usec  
TE              298.0 K  
D1              1.00000000 sec  
TD0             1

===== CHANNEL f1 =====  
NUC1            1H  
P1              9.60 usec  
PL1             -6.00 dB  
PL1W            15.19999981 W  
SFO1            500.3030896 MHz  
SI              32768  
SF              500.3000240 MHz  
WDW             EM  
SSB             0  
LB              0.30 Hz  
GB              0  
PC              1.00

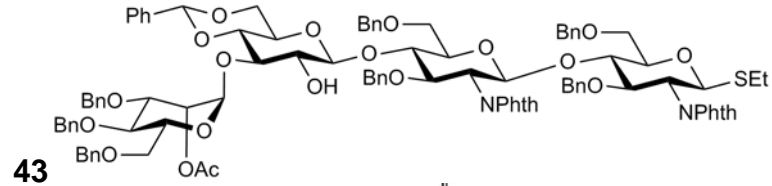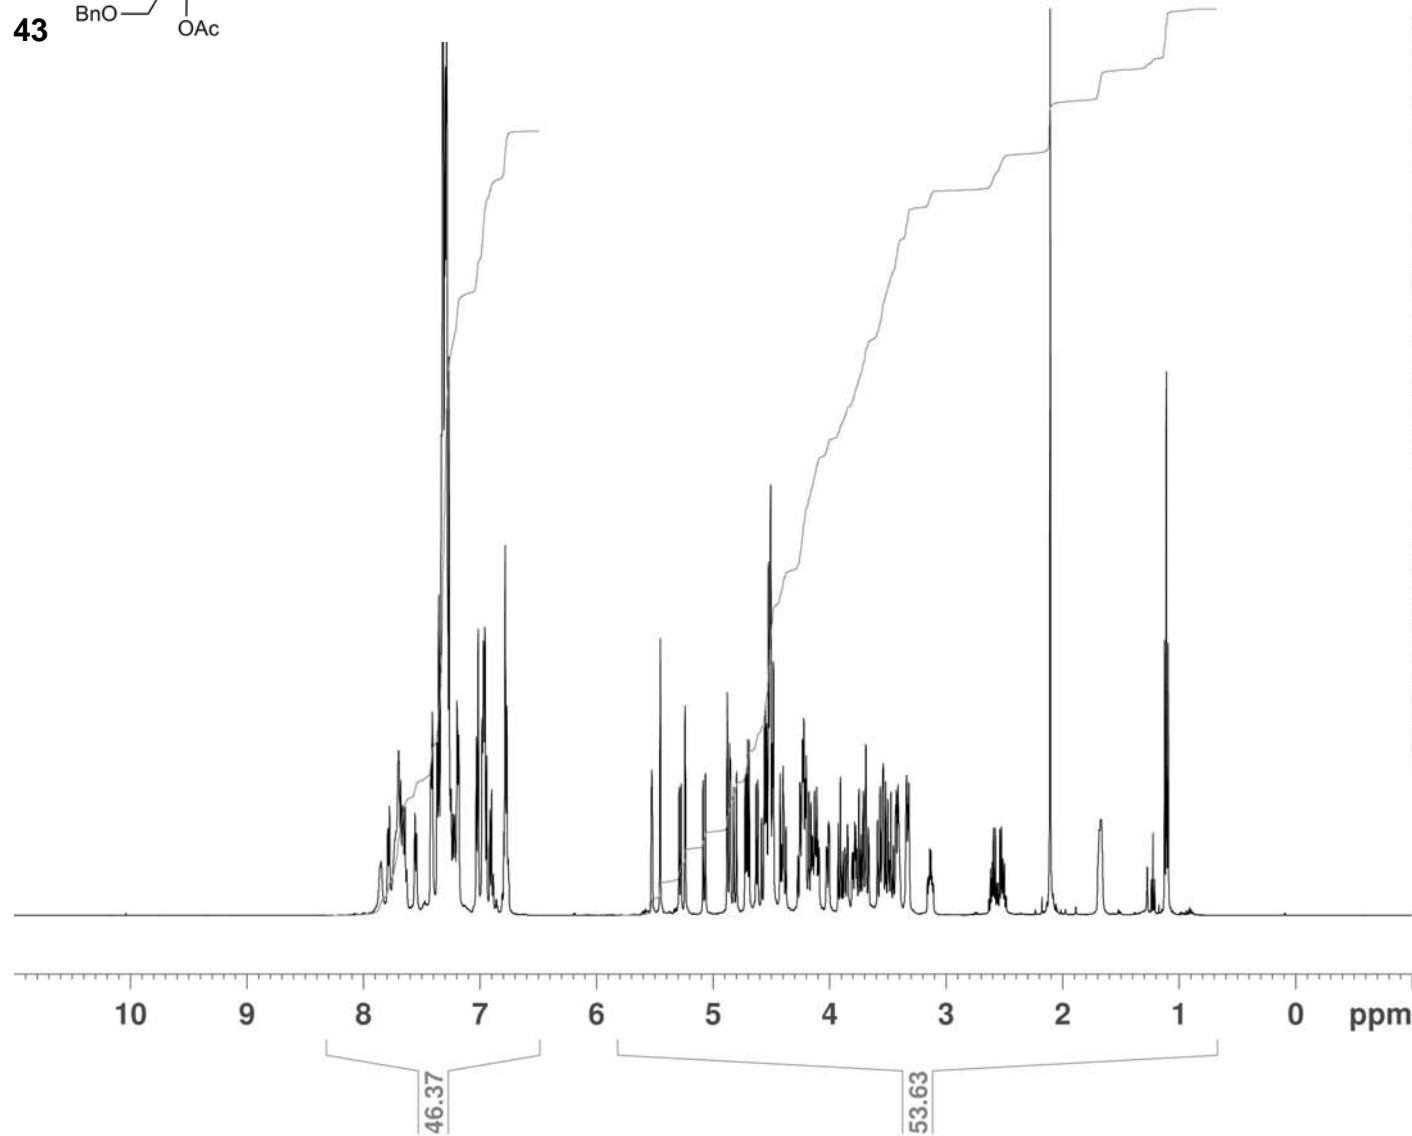

NMROCHEM.OX

43

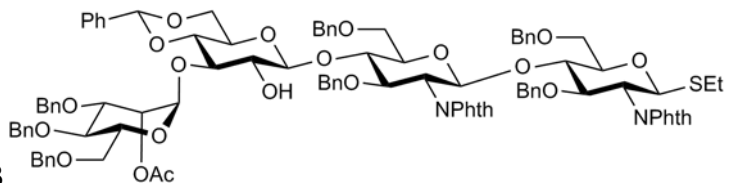

```

NAME          cb97180807
EXPNO         4
PROCNO        1
Date_         20100709
Time          0.50
INSTRUM       avc500
PROBHD        5 mm CPDUL 13C
PULPROG       zgpg30
TD            65536
SOLVENT       CDC13
NS            1024
DS            2
SWH           31250.000 Hz
FIDRES        0.476837 Hz
AQ            1.0486259 sec
RG            1820
DW            16.000 usec
DE            20.00 usec
TE            298.0 K
D1            2.00000000 sec
D11           0.03000000 sec
TD0           1
  
```

```

===== CHANNEL f1 =====
NUC1          13C
P1            9.50 usec
PL1           -4.40 dB
PL1W          28.15752029 W
SFO1          125.8131151 MHz
  
```

```

===== CHANNEL f2 =====
CPDPRG2       waltz16
NUC2          1H
PCPD2         80.00 usec
PL2           -6.00 dB
PL12          12.42 dB
PL13          120.00 dB
PL2W          15.19999981 W
PL12W         0.21869738 W
PL13W         0.00000000 W
SFO2          500.3020012 MHz
SI            32768
SF            125.8005438 MHz
WDW           EM
SSB           0
LB            1.00 Hz
GB            0
PC            1.40
  
```

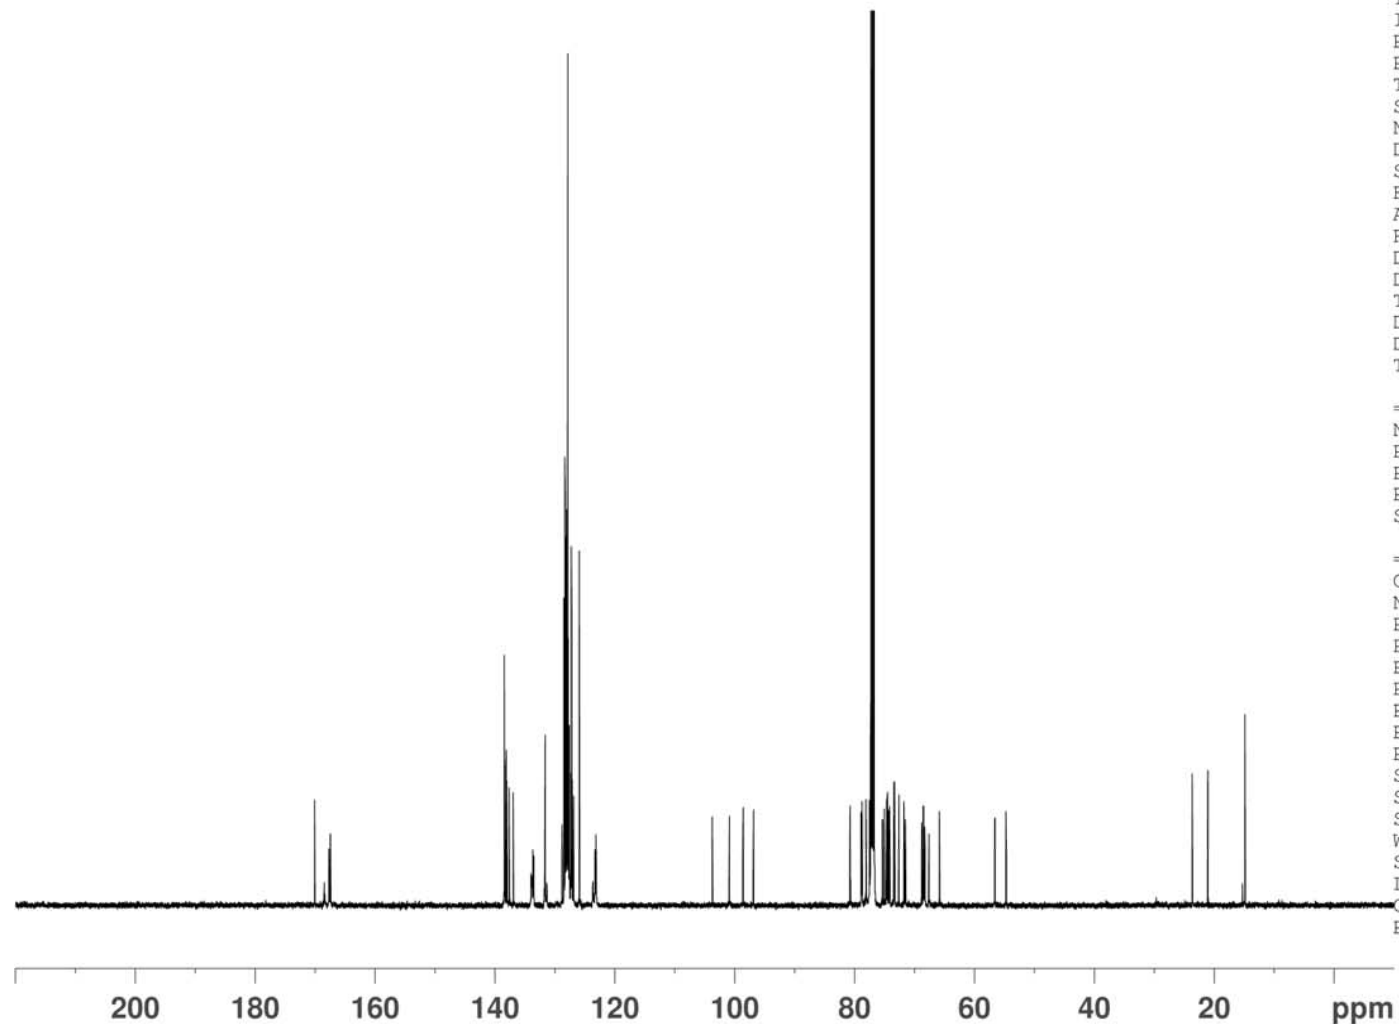

24

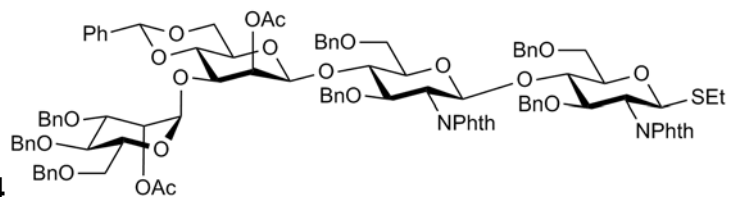

# NMR@CHEM.OX

```

NAME      Jun26-2010-48
EXPNO     1
PROCNO    1
Date_     20100626
Time      12.30
INSTRUM   av400
PROBHD    5 mm QNP 1H/13
PULPROG   zg60
TD         65536
SOLVENT   CDC13
NS         16
DS         2
SWH        8278.146 Hz
FIDRES     0.126314 Hz
AQ         3.9584243 sec
RG         20.2
DW         60.400 usec
DE         7.50 usec
TE         300.0 K
D1         1.00000000 sec
  
```

```

===== CHANNEL f1 =====
NUC1      1H
P1        9.00 usec
PL1       0.00 dB
SFO1      400.2024714 MHz
SI        32768
SF        400.2000028 MHz
WDW       EM
SSB       0
LB        0.30 Hz
GB        0
PC        1.00
  
```

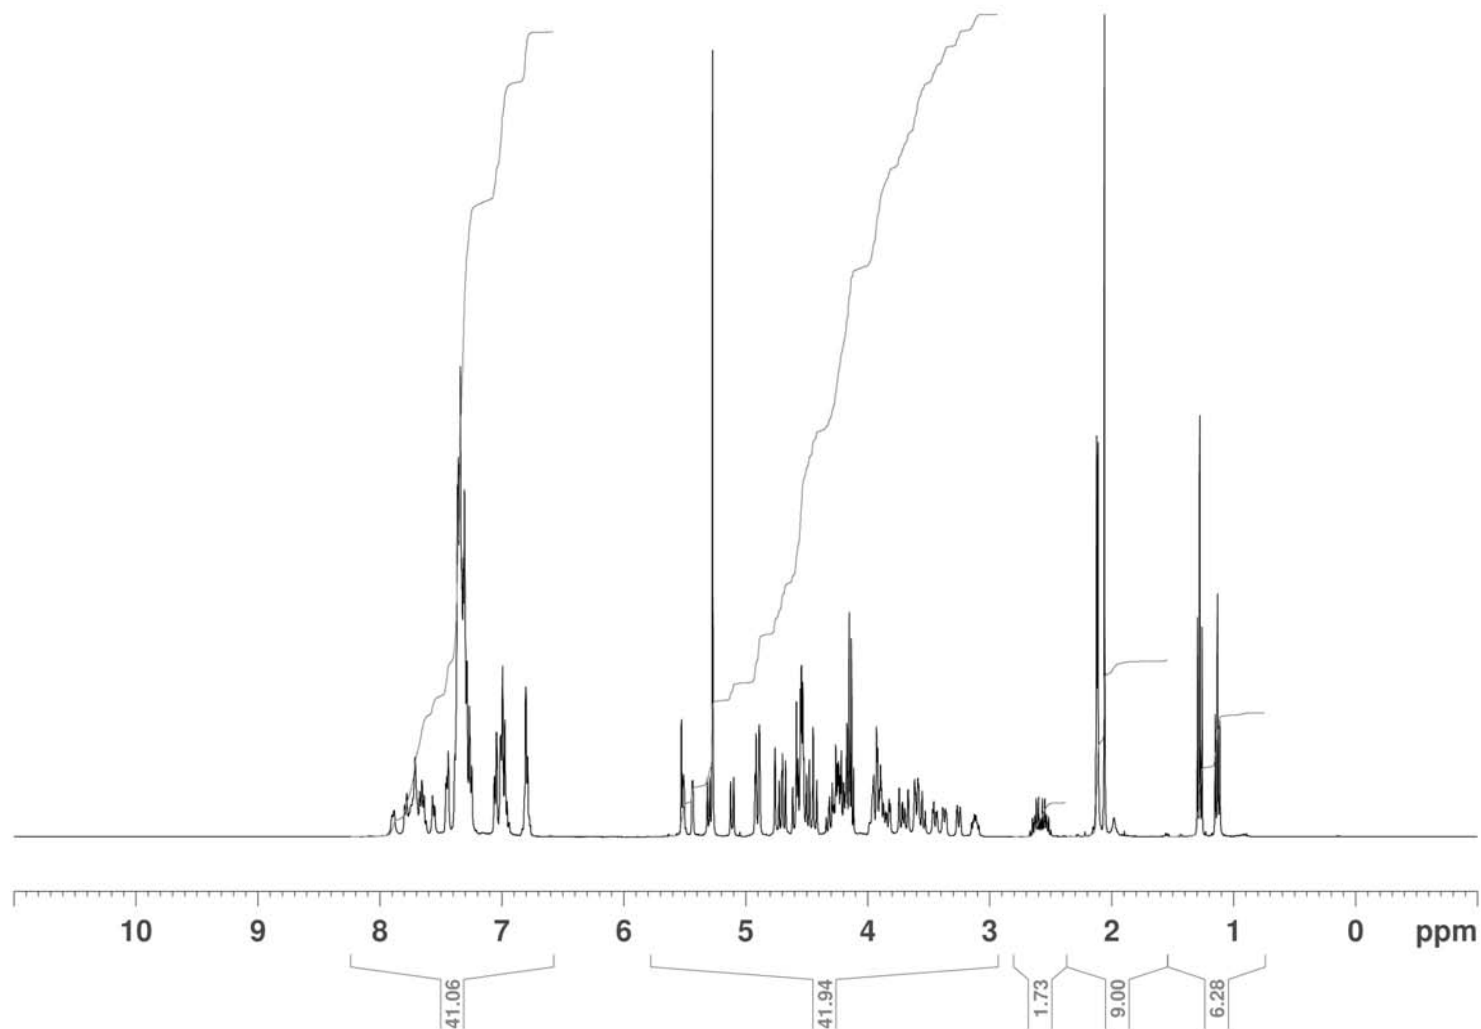

24

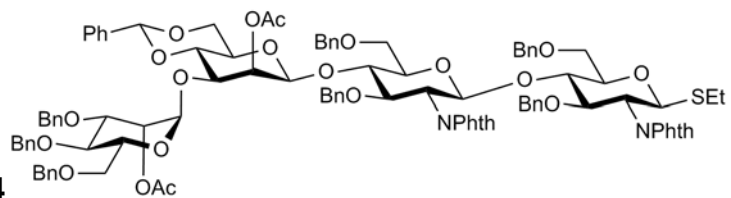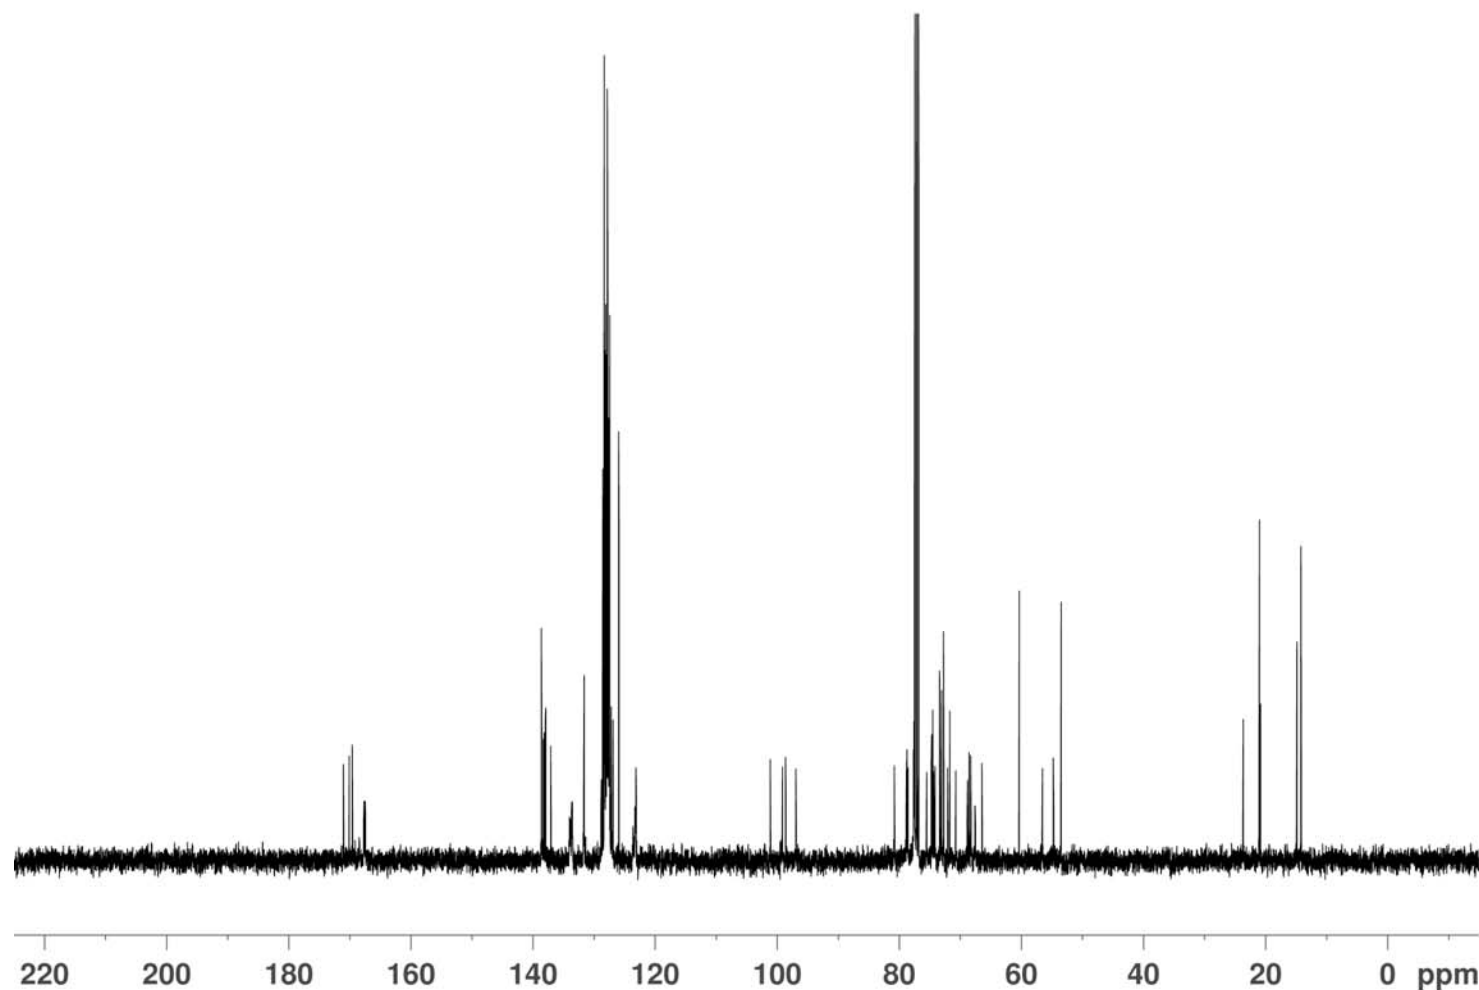

NMR@CHEM.OX

NAME Jun26-2010-48  
 EXPNO 2  
 PROCNO 1  
 Date\_ 20100626  
 Time 12.38  
 INSTRUM av400  
 PROBHD 5 mm QNP 1H/13  
 PULPROG zgpg30  
 TD 32768  
 SOLVENT CDC13  
 NS 256  
 DS 4  
 SWH 26178.010 Hz  
 FIDRES 0.798889 Hz  
 AQ 0.6259188 sec  
 RG 32768  
 DW 19.100 usec  
 DE 7.50 usec  
 TE 300.0 K  
 D1 1.00000000 sec  
 D11 0.03000000 sec  
 TD0 1

==== CHANNEL f1 =====  
 NUC1 13C  
 P1 9.50 usec  
 PL1 0.00 dB  
 SFO1 100.6403931 MHz

==== CHANNEL f2 =====  
 CPDPRG2 waltz16  
 NUC2 1H  
 PCPD2 80.00 usec  
 PL2 0.00 dB  
 PL12 19.00 dB  
 PL13 25.00 dB  
 SFO2 400.2016008 MHz  
 SI 32768  
 SF 100.6303718 MHz  
 WDW EM  
 SSB 0  
 LB 1.00 Hz  
 GB 0  
 PC 1.40

NMRO@CHEM.OX

```

NAME          cb97190807
EXPNO         1
PROCNO       1
Date_        20100709
Time         1.58
INSTRUM      avc500
PROBHD       5 mm CPDUL 13C
PULPROG      zg30
TD           65536
SOLVENT      CDC13
NS           16
DS           2
SWH          10330.578 Hz
FIDRES       0.157632 Hz
AQ           3.1719923 sec
RG           4
DW           48.400 usec
DE           6.00 usec
TE           298.0 K
D1           1.00000000 sec
TD0          1
  
```

```

===== CHANNEL f1 =====
NUC1          1H
P1            9.60 usec
PL1          -6.00 dB
PL1W         15.19999981 W
SFO1         500.3030896 MHz
SI           32768
SF           500.3000240 MHz
WDW          EM
SSB          0
LB           0.30 Hz
GB           0
PC           1.00
  
```

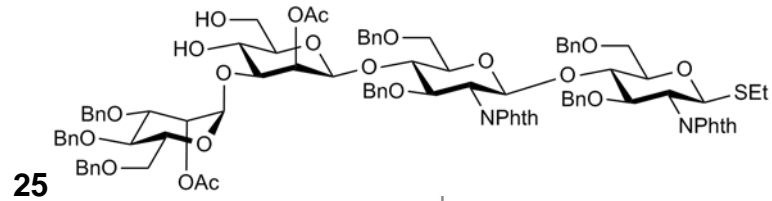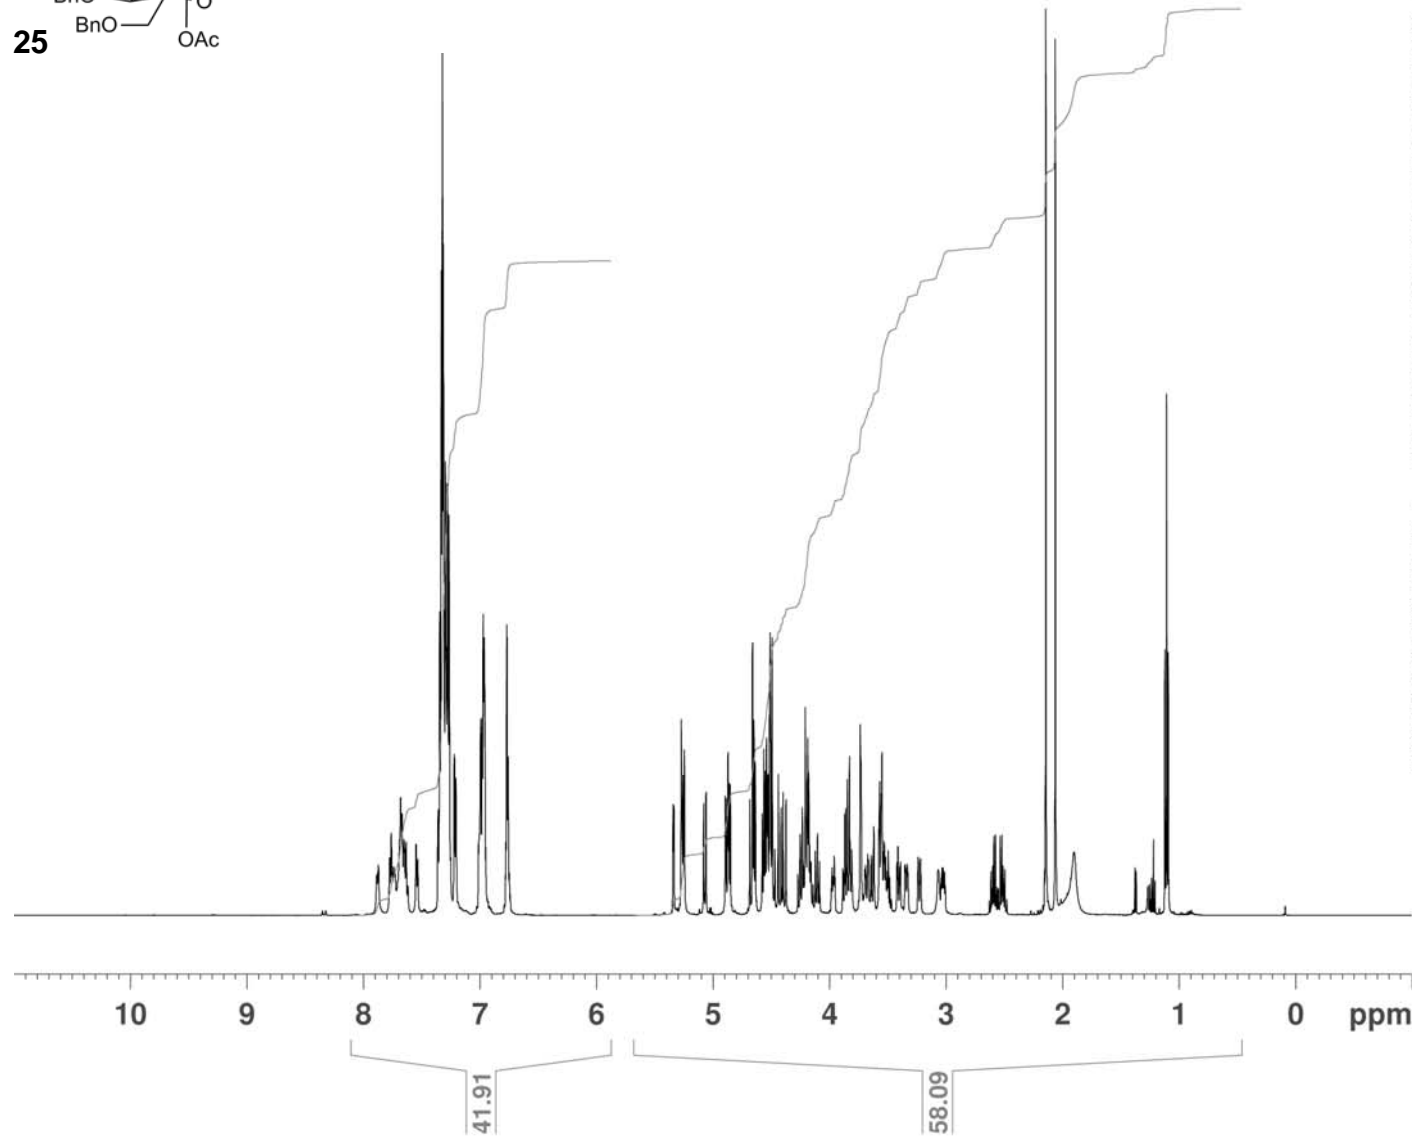

NMROCHEM.OX

```

NAME          cb97190807
EXPNO         4
PROCNO        1
Date_         20100709
Time          3.07
INSTRUM       avc500
PROBHD        5 mm CPDUL 13C
PULPROG       zgpg30
TD            65536
SOLVENT       CDC13
NS            1024
DS            2
SWH           31250.000 Hz
FIDRES        0.476837 Hz
AQ            1.0486259 sec
RG            1820
DW            16.000 usec
DE            20.00 usec
TE            300.0 K
D1            2.00000000 sec
D11           0.03000000 sec
TD0           1
  
```

```

===== CHANNEL f1 =====
NUC1          13C
P1            9.50 usec
PL1           -4.40 dB
PL1W          28.15752029 W
SFO1          125.8131151 MHz
  
```

```

===== CHANNEL f2 =====
CPDPRG2       waltz16
NUC2          1H
PCPD2         80.00 usec
PL2           -6.00 dB
PL12          12.42 dB
PL13          120.00 dB
PL2W          15.19999981 W
PL12W         0.21869738 W
PL13W         0.00000000 W
SFO2          500.3020012 MHz
SI            32768
SF            125.8005438 MHz
WDW           EM
SSB           0
LB            1.00 Hz
GB            0
PC            1.40
  
```

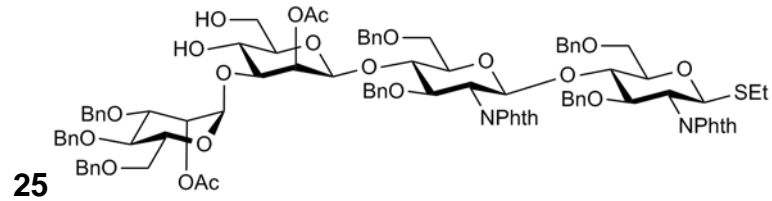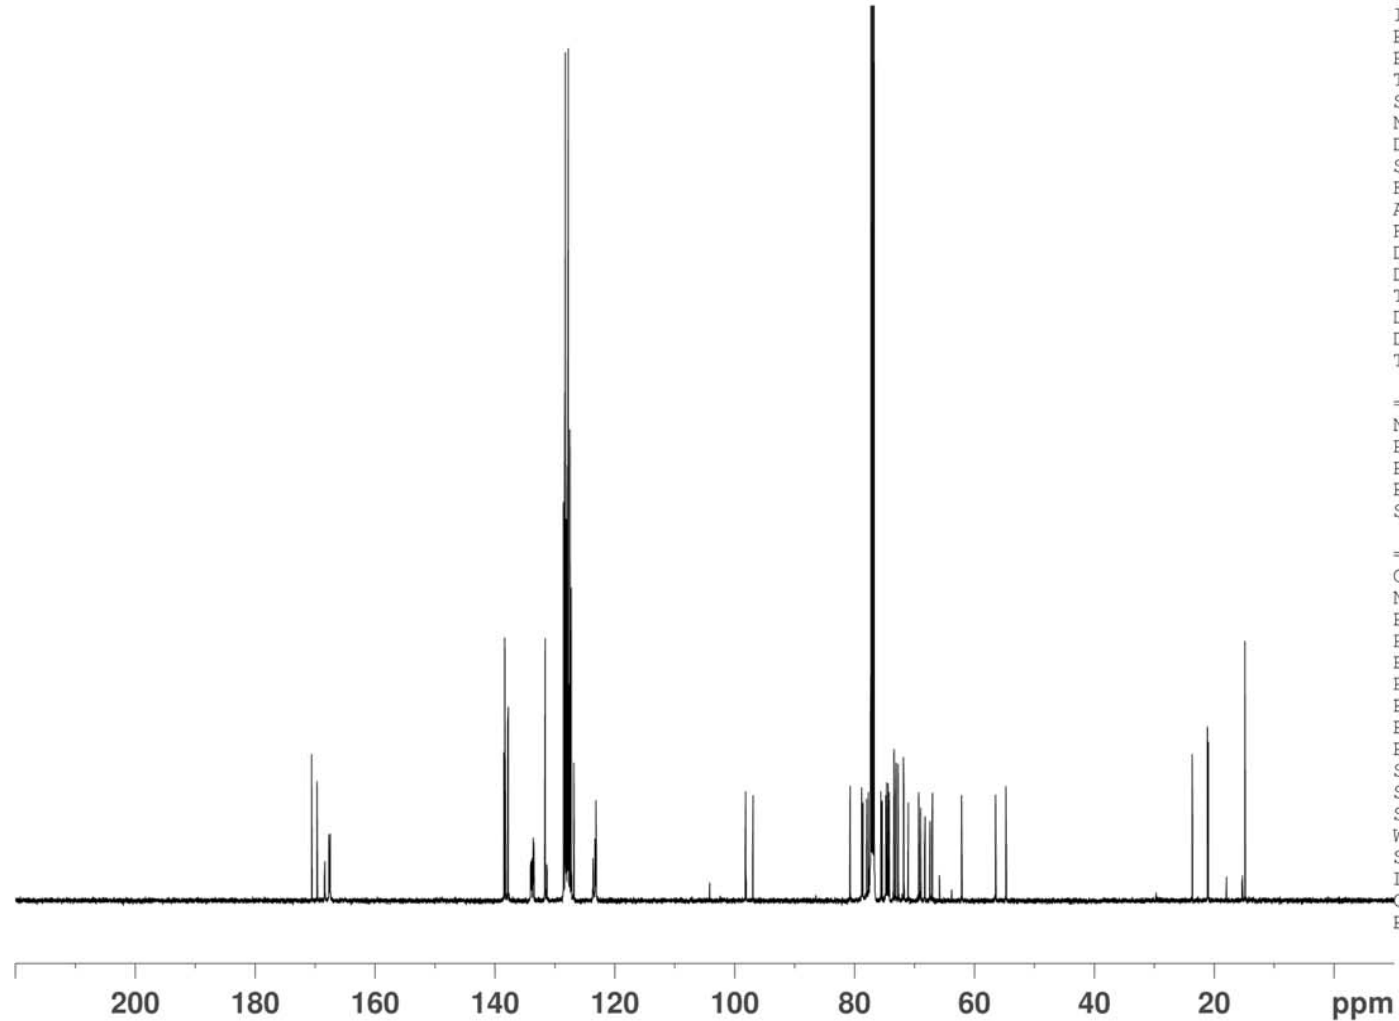

|                               |                      |                          |                                                                   |                               |                      |
|-------------------------------|----------------------|--------------------------|-------------------------------------------------------------------|-------------------------------|----------------------|
| <b>Acquisition Time (sec)</b> | 2.9360               | <b>Comment</b>           | AV700 1H CONNOR BARRY 2751 25/2/11                                | <b>Date</b>                   | 25 Feb 2011 10:01:36 |
| <b>Date Stamp</b>             | 25 Feb 2011 10:01:36 | <b>File Name</b>         | C:\WORK DRIVE\DATA\NMR\FIDS\CB414-4_AV700_CB27512502\1\PDATA\1\1R |                               |                      |
| <b>Frequency (MHz)</b>        | 699.99               | <b>Nucleus</b>           | 1H                                                                | <b>Number of Transients</b>   | 16                   |
| <b>Original Points Count</b>  | 32768                | <b>Owner</b>             | dp-nmrgroup                                                       | <b>Points Count</b>           | 65536                |
| <b>Receiver Gain</b>          | 4.00                 | <b>SW(cyclical) (Hz)</b> | 11160.71                                                          | <b>Solvent</b>                | CHLOROFORM-d         |
| <b>Spectrum Offset (Hz)</b>   | 3499.9480            | <b>Spectrum Type</b>     | STANDARD                                                          | <b>Sweep Width (Hz)</b>       | 11160.54             |
|                               |                      |                          |                                                                   | <b>Temperature (degree C)</b> | 25.020               |

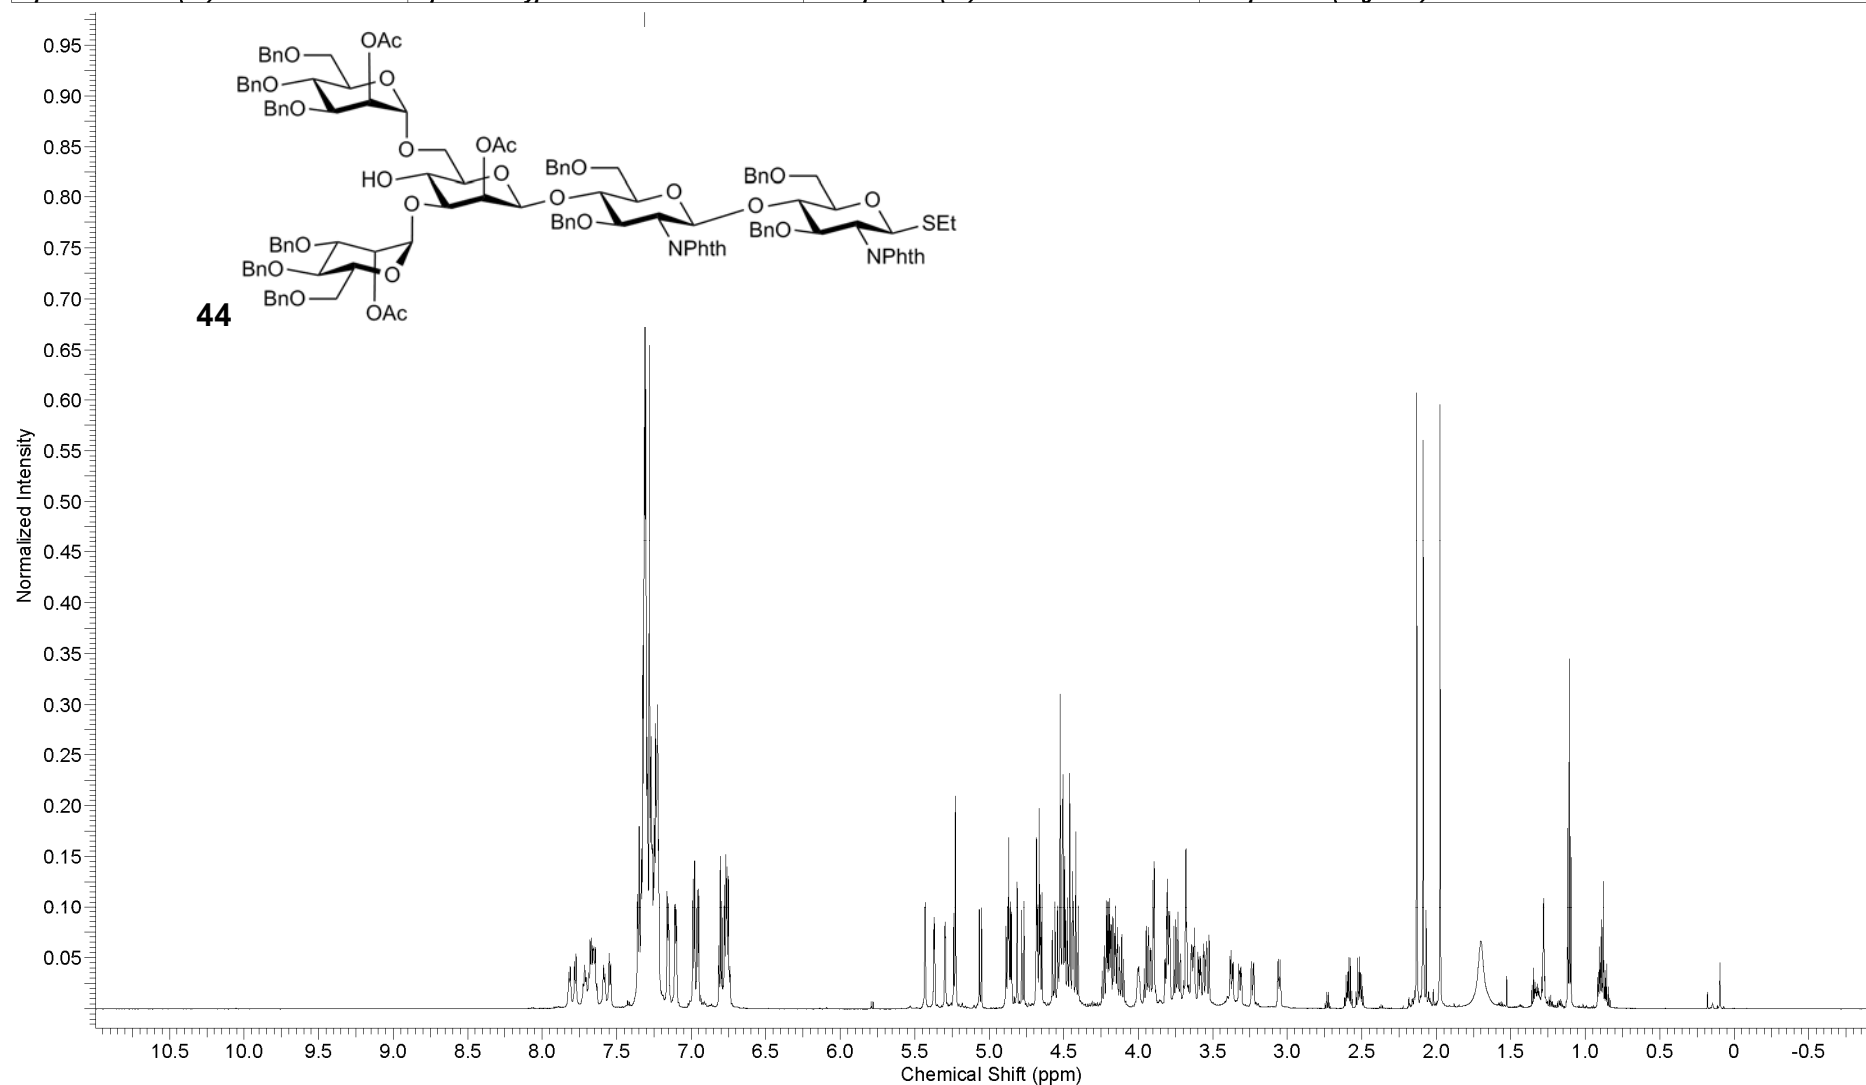



|                               |                      |                          |                                     |                                |                      |
|-------------------------------|----------------------|--------------------------|-------------------------------------|--------------------------------|----------------------|
| <b>Acquisition Time (sec)</b> | 0.7864               | <b>Comment</b>           | AV700 13C CONNOR BARRY 2751 25/2/11 | <b>Date</b>                    | 25 Feb 2011 14:38:56 |
| <b>Date Stamp</b>             | 25 Feb 2011 14:38:56 | <b>File Name</b>         | C:\WORK DRIVE\DATA\NMR\FIDS\CB414-4 | AVC700_CB27512502\7\PDATA\1\1R |                      |
| <b>Frequency (MHz)</b>        | 176.01               | <b>Nucleus</b>           | 13C                                 | <b>Number of Transients</b>    | 2902                 |
| <b>Original Points Count</b>  | 32768                | <b>Owner</b>             | dp-nmrgroup                         | <b>Points Count</b>            | 65536                |
| <b>Receiver Gain</b>          | 2050.00              | <b>SW(cyclical) (Hz)</b> | 41666.67                            | <b>Solvent</b>                 | CHLOROFORM-d         |
| <b>Spectrum Type</b>          | STANDARD             | <b>Sweep Width (Hz)</b>  | 41666.03                            | <b>Temperature (degree C)</b>  | 25.020               |
|                               |                      |                          |                                     | <b>Spectrum Offset (Hz)</b>    | 17600.7637           |

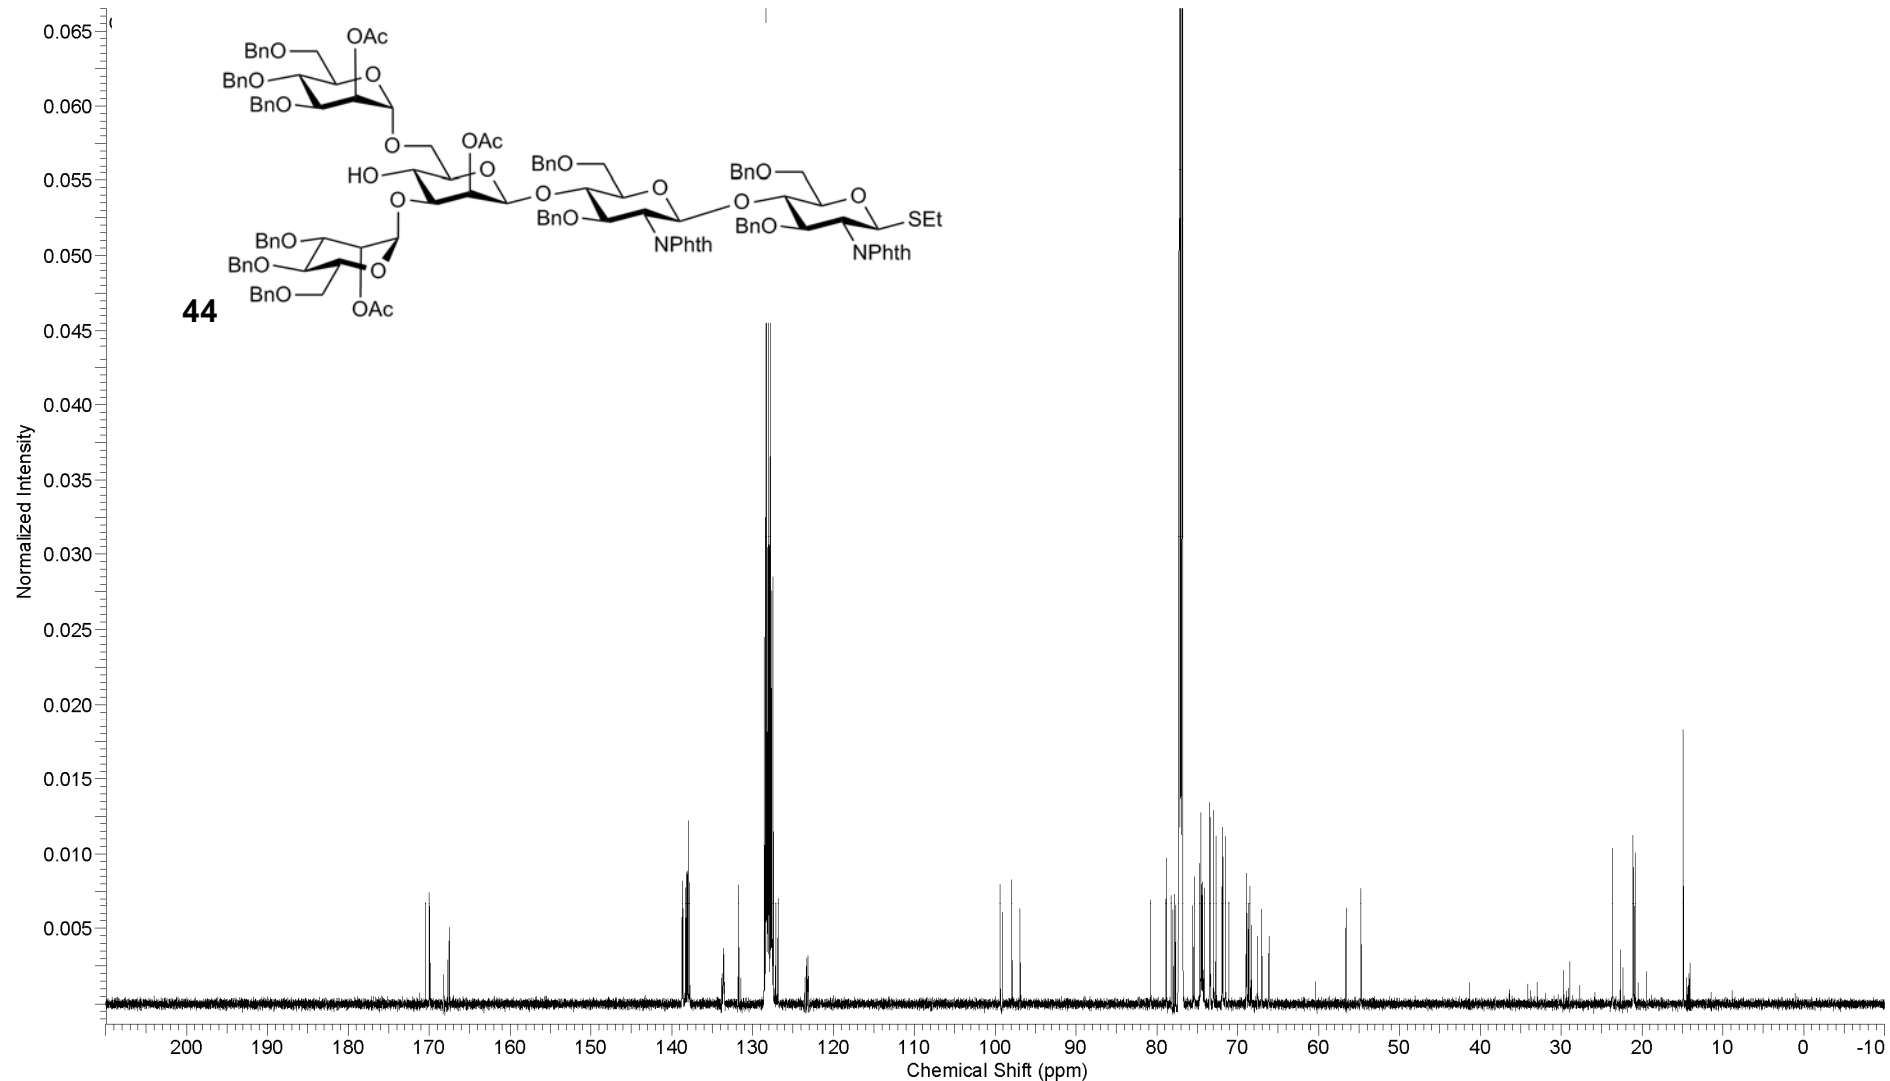

NMR@CHEM.OX

NAME            cb04880109  
 EXPNO           1  
 PROCNO          1  
 Date\_           20100901  
 Time            17.54  
 INSTRUM         avc500  
 PROBHD         5 mm CPDUL 13C  
 PULPROG         zg30  
 TD               65536  
 SOLVENT         CDCl3  
 NS               16  
 DS               2  
 SWH             10330.578 Hz  
 FIDRES          0.157632 Hz  
 AQ               3.1719923 sec  
 RG               4  
 DW               48.400 usec  
 DE               6.00 usec  
 TE               302.5 K  
 D1               1.00000000 sec  
 TDO              1

===== CHANNEL f1 =====  
 NUC1            1H  
 P1               9.60 usec  
 PL1             -6.00 dB  
 PL1W            15.19999981 W  
 SFO1            500.3030896 MHz  
 SI               32768  
 SF               500.3000240 MHz  
 WDW             EM  
 SSB             0  
 LB               0.30 Hz  
 GB               0  
 PC               1.00

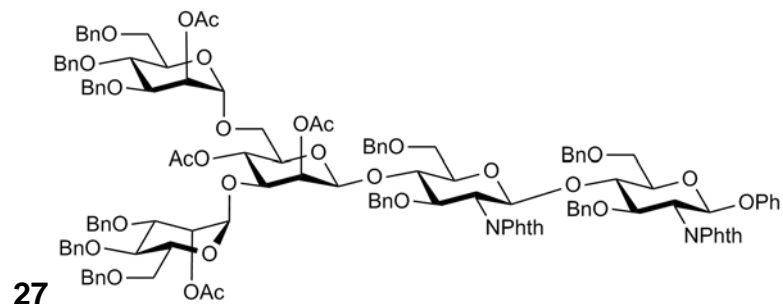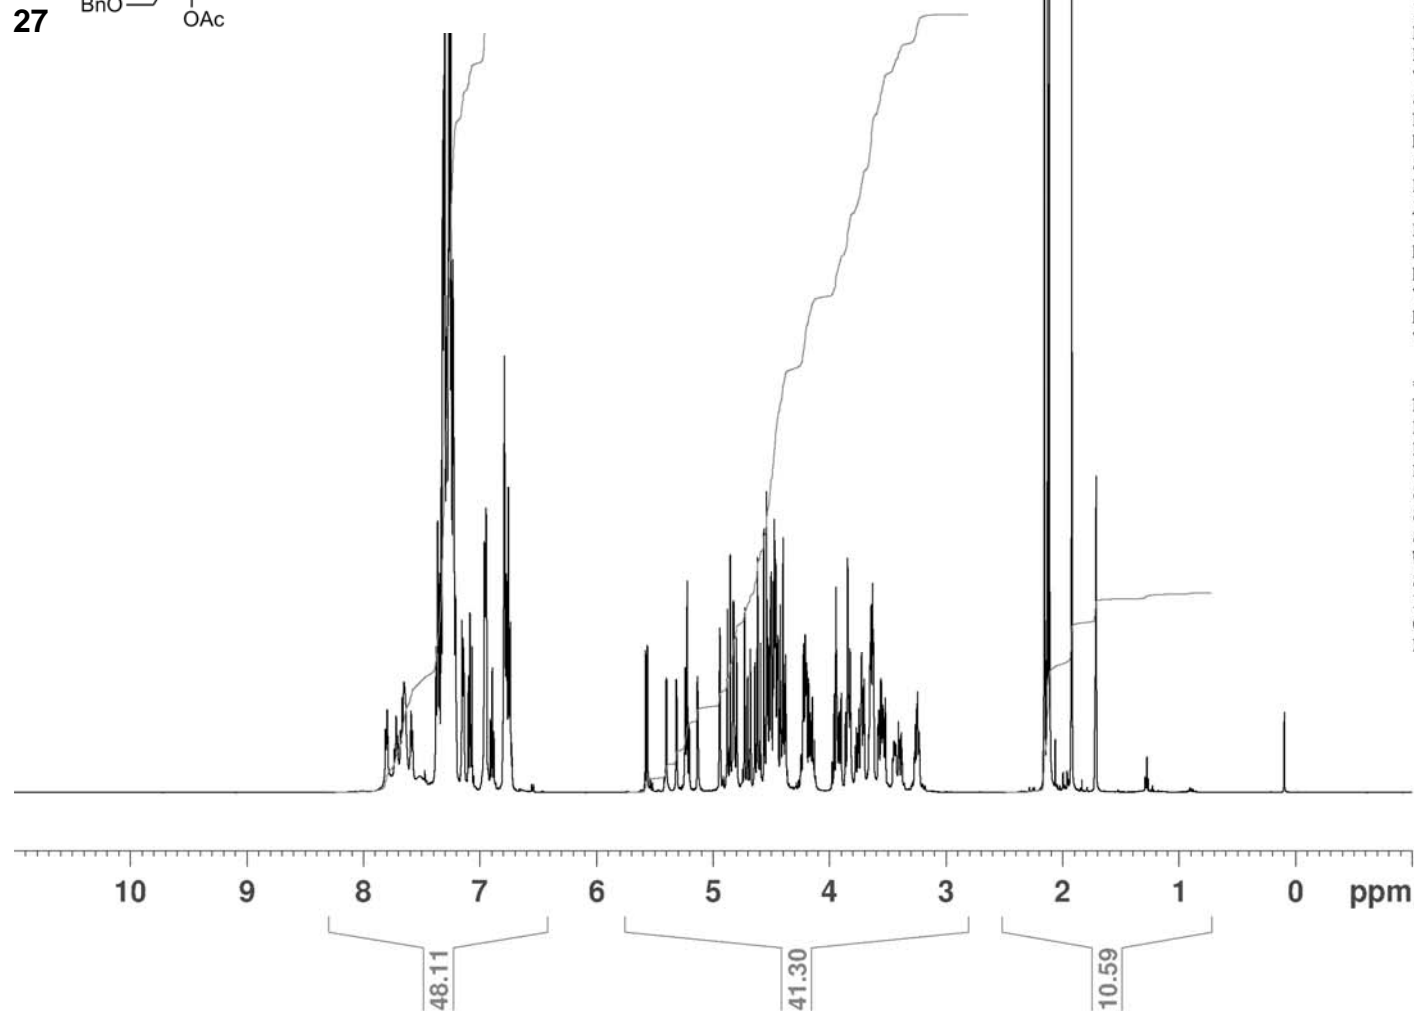

NMROCHEM.OX

NAME cb04880109  
 EXPNO 4  
 PROCNO 1  
 Date\_ 20100901  
 Time 19.03  
 INSTRUM avc500  
 PROBHD 5 mm CPDUL 13C  
 PULPROG zgpg30  
 TD 65536  
 SOLVENT CDCl3  
 NS 1024  
 DS 2  
 SWH 31250.000 Hz  
 FIDRES 0.476837 Hz  
 AQ 1.0486259 sec  
 RG 1820  
 DW 16.000 usec  
 DE 20.00 usec  
 TE 302.5 K  
 D1 2.00000000 sec  
 D11 0.03000000 sec  
 TD0 1

==== CHANNEL f1 =====  
 NUC1 13C  
 P1 9.50 usec  
 PL1 -4.40 dB  
 PL1W 28.15752029 W  
 SFO1 125.8131151 MHz

==== CHANNEL f2 =====  
 CPDPRG2 waltz16  
 NUC2 1H  
 PCPD2 80.00 usec  
 PL2 -6.00 dB  
 PL12 12.42 dB  
 PL13 120.00 dB  
 PL2W 15.19999981 W  
 PL12W 0.21869738 W  
 PL13W 0.00000000 W  
 SFO2 500.3020012 MHz  
 SI 32768  
 SF 125.8005438 MHz  
 WDW EM  
 SSB 0  
 LB 1.00 Hz  
 GB 0  
 PC 1.40

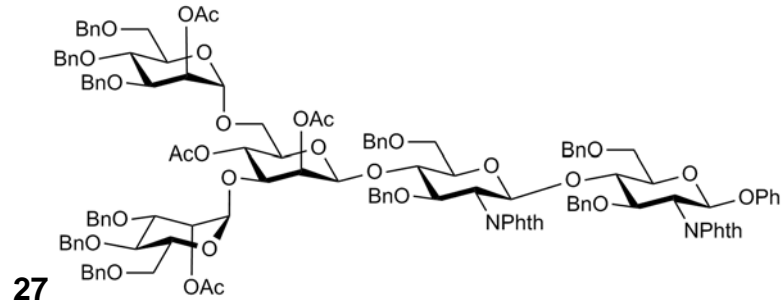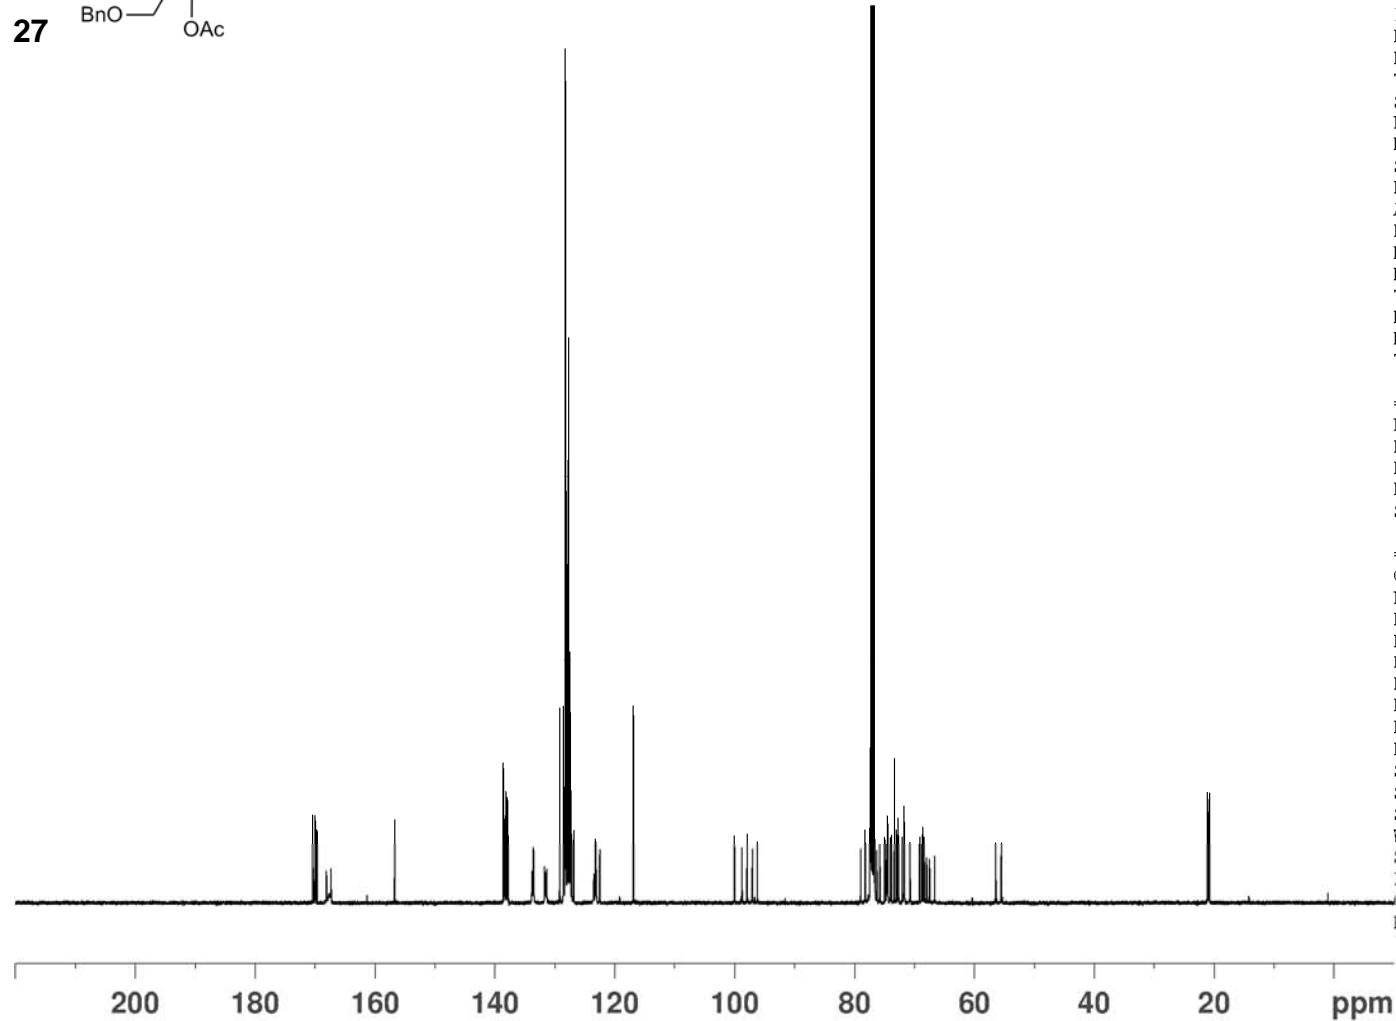

NMRO@CHEM.OX

NAME           cb04950109  
 EXPNO           1  
 PROCNO          1  
 Date\_           20100902  
 Time            4.48  
 INSTRUM        avc500  
 PROBHD         5 mm CPDUL 13C  
 PULPROG        zg30  
 TD              65536  
 SOLVENT        CDCl3  
 NS              16  
 DS              2  
 SWH            10330.578 Hz  
 FIDRES         0.157632 Hz  
 AQ              3.1719923 sec  
 RG              4  
 DW              48.400 usec  
 DE              6.00 usec  
 TE              302.5 K  
 D1              1.00000000 sec  
 TDO             1

===== CHANNEL f1 =====  
 NUC1            1H  
 P1              9.60 usec  
 PL1             -6.00 dB  
 PL1W            15.19999981 W  
 SFO1            500.3030896 MHz  
 SI              32768  
 SF              500.3000240 MHz  
 WDW             EM  
 SSB             0  
 LB              0.30 Hz  
 GB              0  
 PC              1.00

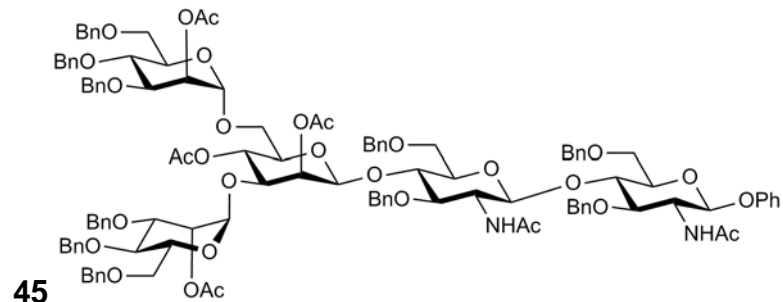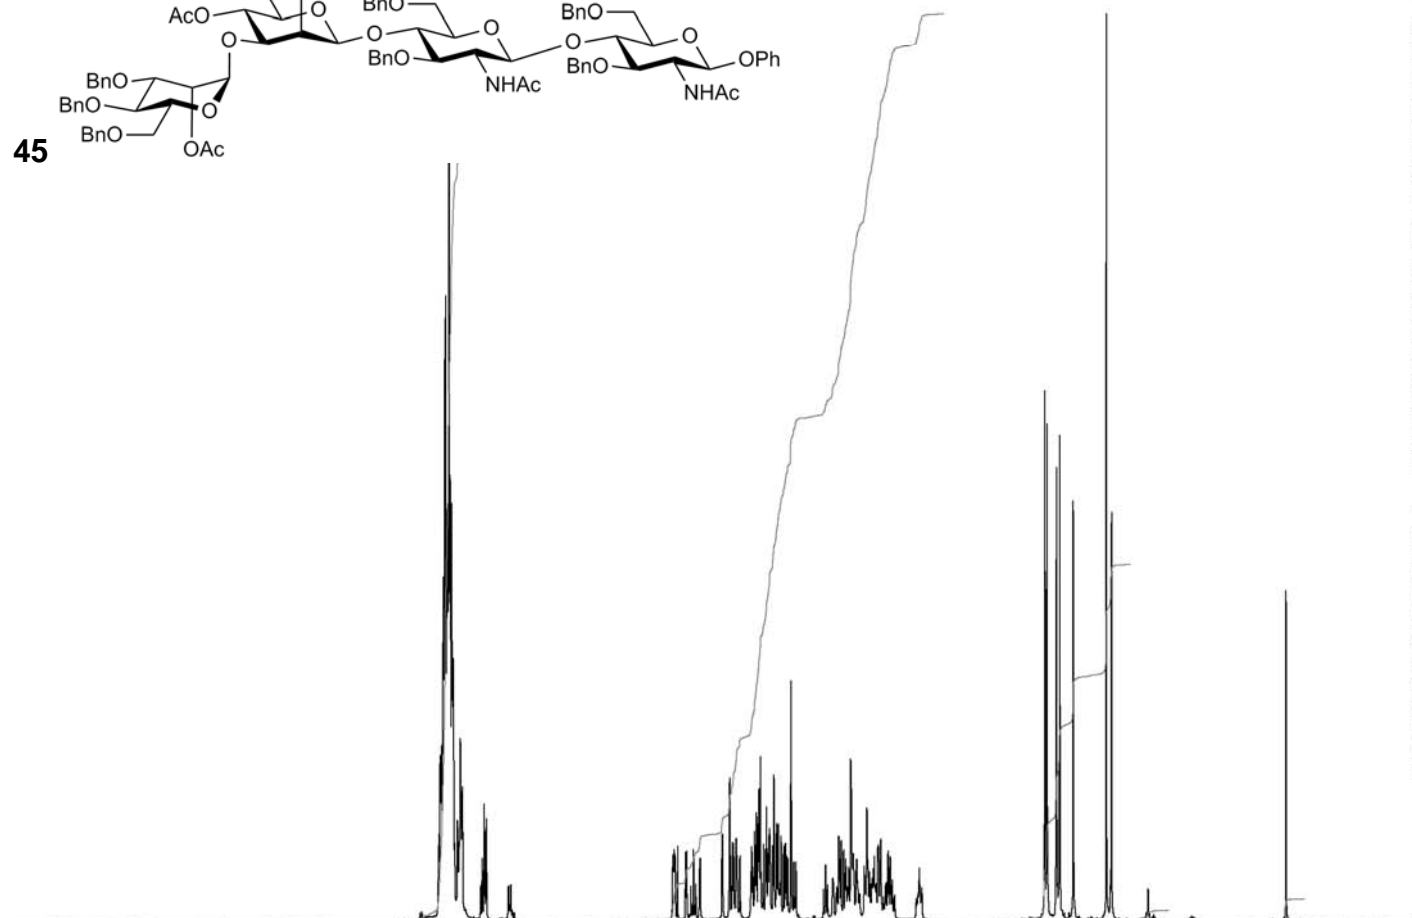

10    9    8    7    6    5    4    3    2    1    0    ppm

41.16    41.22    16.20    0.46    0.97

NMROCHEM.OX

NAME cb04950109  
 EXPNO 4  
 PROCNO 1  
 Date\_ 20100902  
 Time 5.58  
 INSTRUM avc500  
 PROBHD 5 mm CPDUL 13C  
 PULPROG zgpg30  
 TD 65536  
 SOLVENT CDCl3  
 NS 1024  
 DS 2  
 SWH 31250.000 Hz  
 FIDRES 0.476837 Hz  
 AQ 1.0486259 sec  
 RG 1820  
 DW 16.000 usec  
 DE 20.00 usec  
 TE 302.5 K  
 D1 2.00000000 sec  
 D11 0.03000000 sec  
 TD0 1

==== CHANNEL f1 =====  
 NUC1 13C  
 P1 9.50 usec  
 PL1 -4.40 dB  
 PL1W 28.15752029 W  
 SFO1 125.8131151 MHz

==== CHANNEL f2 =====  
 CPDPRG2 waltz16  
 NUC2 1H  
 PCPD2 80.00 usec  
 PL2 -6.00 dB  
 PL12 12.42 dB  
 PL13 120.00 dB  
 PL2W 15.19999981 W  
 PL12W 0.21869738 W  
 PL13W 0.00000000 W  
 SFO2 500.3020012 MHz  
 SI 32768  
 SF 125.8005438 MHz  
 WDW EM  
 SSB 0  
 LB 1.00 Hz  
 GB 0  
 PC 1.40

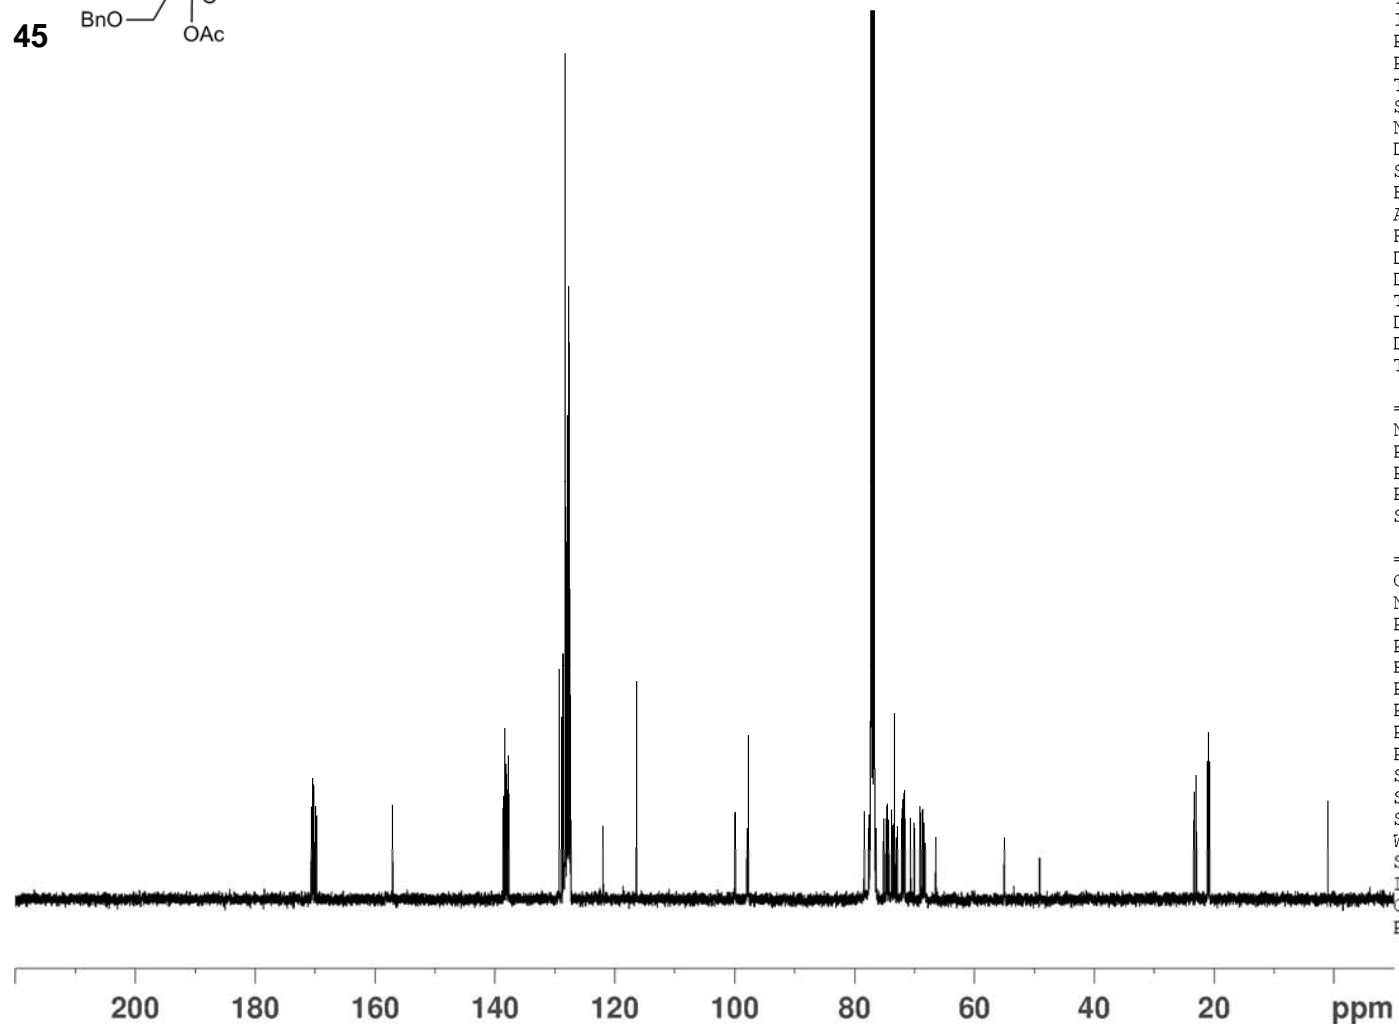

|                               |                      |                          |                                                        |                               |                      |
|-------------------------------|----------------------|--------------------------|--------------------------------------------------------|-------------------------------|----------------------|
| <b>Acquisition Time (sec)</b> | 2.9360               | <b>Comment</b>           | AV700 1H Conor Barry 20547 17/9./10                    | <b>Date</b>                   | 17 Sep 2010 11:10:08 |
| <b>Date Stamp</b>             | 17 Sep 2010 11:10:08 | <b>File Name</b>         | C:\WORK DRIVE\DATA\NMR\FIDS\CB404-1_AV700\1\PDATA\1\1R |                               |                      |
| <b>Frequency (MHz)</b>        | 699.99               | <b>Nucleus</b>           | 1H                                                     | <b>Number of Transients</b>   | 16                   |
| <b>Original Points Count</b>  | 32768                | <b>Owner</b>             | dp-nmrgroup                                            | <b>Points Count</b>           | 65536                |
| <b>Receiver Gain</b>          | 6.35                 | <b>SW(cyclical) (Hz)</b> | 11160.71                                               | <b>Solvent</b>                | DEUTERIUM OXIDE      |
| <b>Spectrum Offset (Hz)</b>   | 3499.9480            | <b>Spectrum Type</b>     | STANDARD                                               | <b>Sweep Width (Hz)</b>       | 11160.54             |
|                               |                      |                          |                                                        | <b>Temperature (degree C)</b> | 25.020               |

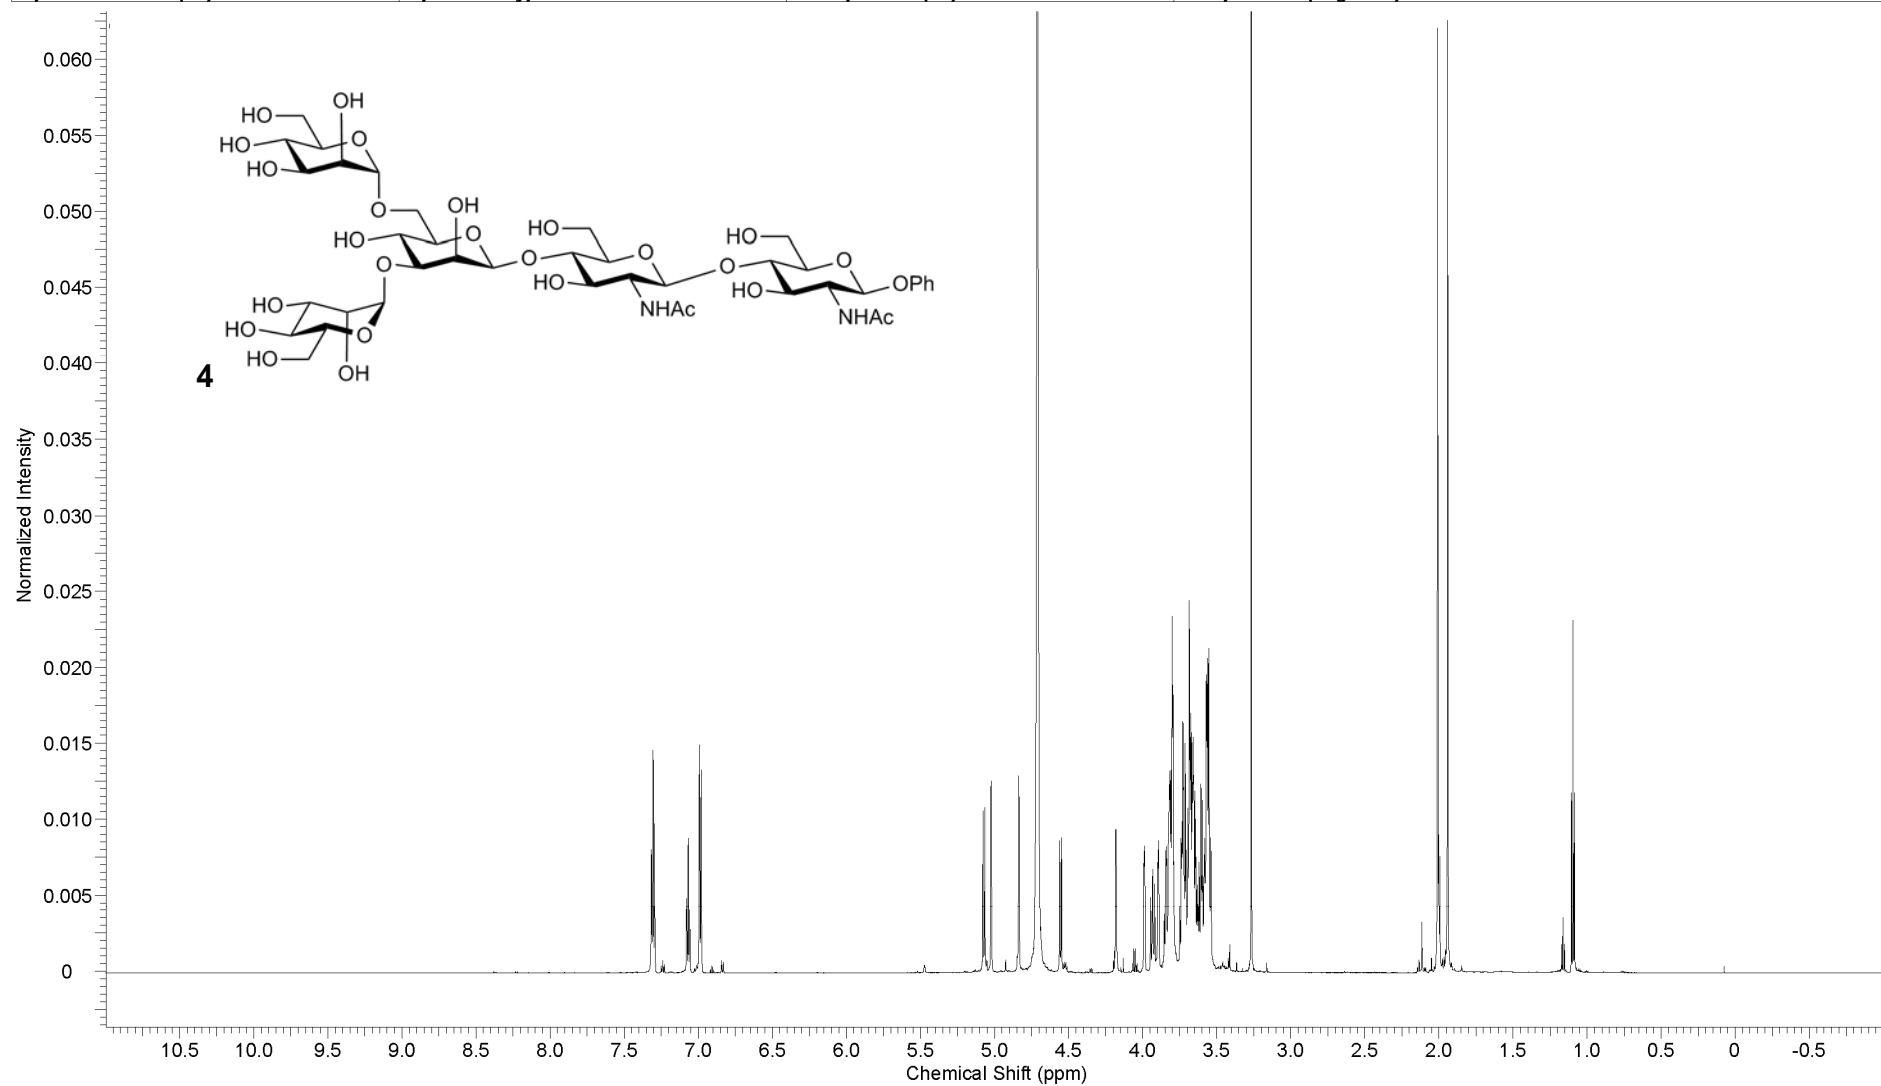

|                               |                      |                          |                                                        |                               |                      |
|-------------------------------|----------------------|--------------------------|--------------------------------------------------------|-------------------------------|----------------------|
| <b>Acquisition Time (sec)</b> | 0.7864               | <b>Comment</b>           | AV700 13C CONNOR BARRY 0547 17/9/10                    | <b>Date</b>                   | 17 Sep 2010 15:36:48 |
| <b>Date Stamp</b>             | 17 Sep 2010 15:36:48 | <b>File Name</b>         | C:\WORK DRIVE\DATA\NMR\FIDS\CB404-1_AV700\7\PDATA\1\1R |                               |                      |
| <b>Frequency (MHz)</b>        | 176.01               | <b>Nucleus</b>           | 13C                                                    | <b>Number of Transients</b>   | 1525                 |
| <b>Original Points Count</b>  | 32768                | <b>Owner</b>             | dp-nmrgroup                                            | <b>Points Count</b>           | 65536                |
| <b>Receiver Gain</b>          | 2050.00              | <b>SW(cyclical) (Hz)</b> | 41666.67                                               | <b>Solvent</b>                | DEUTERIUM OXIDE      |
| <b>Spectrum Offset (Hz)</b>   | 17600.7637           | <b>Spectrum Type</b>     | STANDARD                                               | <b>Sweep Width (Hz)</b>       | 41666.03             |
|                               |                      |                          |                                                        | <b>Temperature (degree C)</b> | 25.020               |

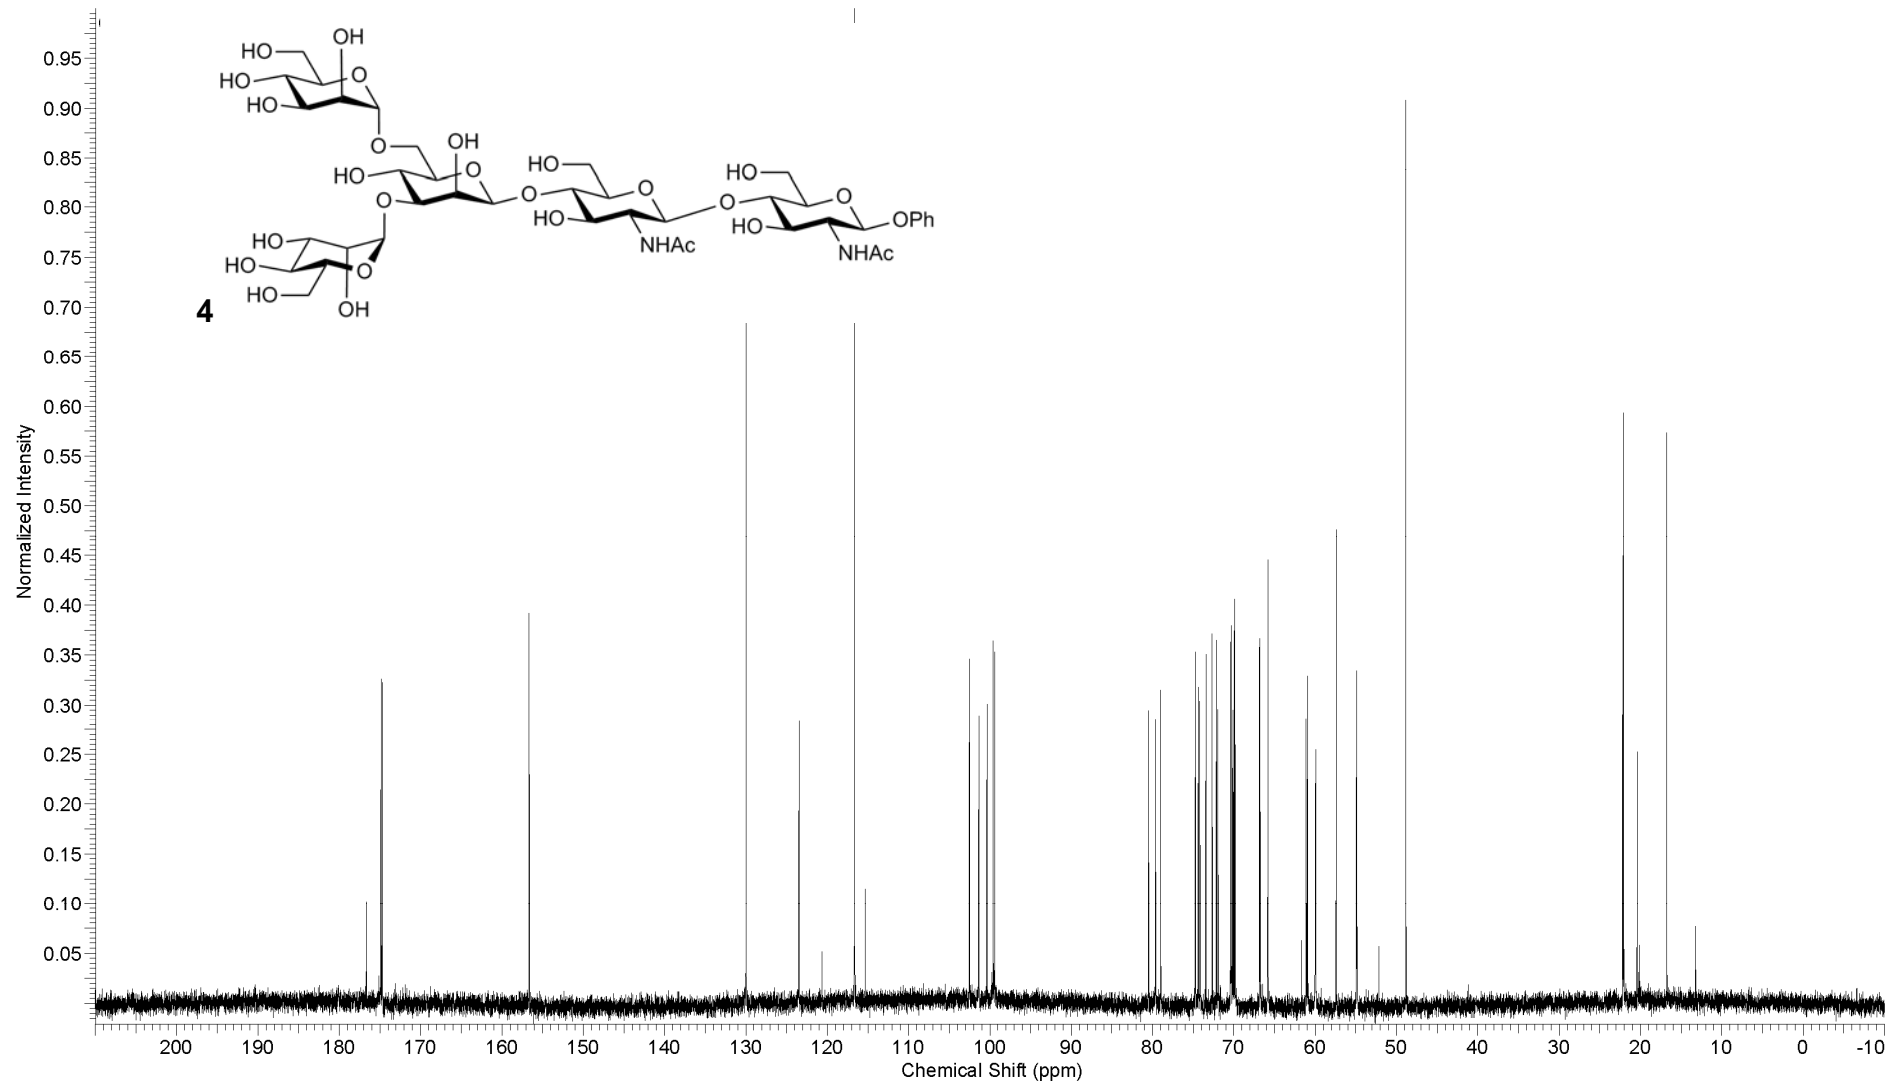

Supplement: ja4056678_si_001.pdf [file ja4056678_si_001.pdf]
